# Supplementary material for: Analysis of the Mouse Hepatic Peroxisome Proteome—Identification of Novel Protein Constituents Using a Semi-Quantitative SWATH-MS Approach
Source: MDPI journal article supplement (doi:10.3390/cells13020176), 2024-01-17
Supplement: s1 [file s1]

**Table S1: List of primary antibodies**

| Target                      | Source                                                                                | Immunogen                                        | Dilution | Host<br>Species   | Applica<br>tion |
|-----------------------------|---------------------------------------------------------------------------------------|--------------------------------------------------|----------|-------------------|-----------------|
| <b>ABCD3</b>                | Sigma-Aldrich,<br>SAB4200181<br>Schnelldorf,<br>Germany                               | ATP-binding cassette (ABC)<br>transporter        | 1:1200   | Mouse<br><br>mAb  | WB              |
| <b>ACBD5</b>                | Abcam (ab100910)<br>Cambridge, UK                                                     | Acyl-CoA-binding domain-<br>containing protein 5 | 1:1000   | RabbitpA<br>b     | WB              |
| <b>ACAD11</b>               | Gift from G.<br>Vockley, Pittsburg<br>University, USA                                 | Acyl-CoA dehydrogenase 11                        | 1:2000   | Rabbit<br><br>pAb | WB              |
| <b>ACOX1</b>                | Gift from T.<br>Hashimoto, Shinshu<br>University School of<br>Medicine, Nagano,<br>JP | Peroxisomal acyl-coenzyme A<br>oxidase 1         | 1:10.000 | Rabbit            | WB              |
| <b>ATPA</b>                 | BD Transduction<br>Laboratories<br>612517 San Diego,<br>USA                           | ATP synthase subunit alpha,<br>mitochondrial     | 1:10.000 | Mouse<br>mAb      | WB              |
| <b>ATPB</b>                 | Proteintech (66600)<br>Rosemont IL, USA                                               | $\beta$ -subunit of ATP synthase                 | 1:5000   | Mouse<br><br>mAb  | WB              |
| <b>BiP/GRP78</b>            | BD Transduction<br>Laboratories<br>610978 San Diego<br>USA                            | Endoplasmic reticulum<br>chaperone BiP           | 1:1000   | Mouse<br>mAb      | WB              |
| <b>Catalase</b>             | Gift from A. Völkl,<br>University of<br>Heidelberg,<br>Germany                        | Catalase                                         | 10 ug/ml | Rabbit            | WB              |
| <b>c-myc tag<br/>(9B11)</b> | Cell Signaling #2276<br>Danvers,<br>Massachusetts USA                                 | myc epitope tag                                  | 1:500    | Mouse<br><br>mAb  | IF              |
| <b>ERP29 (LY1C6)</b>        | Abcam ab11420-<br>50 Cambridge, UK                                                    | Endoplasmic reticulum<br>resident protein 29     | 1:5000   | Rabbit<br>pAb     | WB              |
| <b>FATP4</b>                | Abcam ab200353<br>Cambridge, UK                                                       | Fatty acid protein 4                             | 1:1000   | Rabbit<br>mAb     | WB              |
| <b>LAMP1</b>                | Santa Cruz<br>Biotechnology sc-<br>17768 Santa<br>Cruz, USA                           | Lysosome-associated<br>membrane proteins         | 1:500    | Mouse<br>mAb      | IF              |
| <b>OCIAD1</b>               | Novus biotechnie<br>NBP1-76242<br>Abingdon UK                                         | OCIA-domain containing<br>protein 1              | 1:100    | Rabbit<br><br>pAb | IF              |
| <b>PEX3</b>                 | Gift from G. Dodt,<br>University of<br>Tübingen, Germany                              | Peroxisomal Biogenesis Factor<br>3               | 1:1000   | Rabbit            | WB              |

|               |                                                                  |                                                       |        |            |        |
|---------------|------------------------------------------------------------------|-------------------------------------------------------|--------|------------|--------|
| <b>PEX14</b>  | Proteogenix, selfmade (7790-03107-A02)<br>Oberhausbergen, France | Peroxisomal Biogenesis Factor 14                      | 1:2000 | Guinea pig | IF     |
| <b>PMP22</b>  | Gift from A. Vökl, University of Heidelberg, Germany             | Peroxisomal membrane protein 22                       | 1:500  | Rabbit     | WB     |
| <b>RAB5A</b>  | Proteintech 11974-1-AP<br>Rosemont IL, USA                       | The small GTPase Rab                                  | 1:1000 | Rabbit pAb | IF     |
| <b>SAR1B</b>  | Proteintech/ptglab 22292-1-AP<br>Rosemont IL, USA                | Secretion Associated Ras Related GTPase 1B            | 1:200  | Rabbit pAb | IF     |
| <b>SCP-X</b>  | MyBio Source MBS 1495100 San Diego, USA                          | Serol Carrier Protein                                 | 1:500  | Rabbit pAb | WB     |
| <b>TOMM20</b> | BD Transduction Laboratories 612278 San Diego, USA               | Translocase of the Outer Membrane of the mitochondria | 1:1000 | Mouse mAb  | WB, IF |

**Table S2: List of secondary antibodies**

| <b>Conjugated Molecule</b> | <b>Source</b>     | <b>Dilution</b> | <b>Reactivity</b>        | <b>Use</b> |
|----------------------------|-------------------|-----------------|--------------------------|------------|
| <b>Alexa Fluor® 488</b>    | Invitrogen A32723 | 1:1000          | Goat anti mouse IgG      | IF         |
| <b>Alexa Fluor® 488</b>    | Invitrogen A32723 | 1:1000          | Goat anti mouse IgG      | IF         |
| <b>Alexa Fluor® 568</b>    | Invitrogen A11041 | 1:1000          | Goat anti chicken IgG    | IF         |
| <b>Alexa Fluor® 568</b>    | Invitrogen A11011 | 1:1000          | Goat anti rabbit IgG     | IF         |
| <b>Alexa Fluor® 568</b>    | Invitrogen A11036 | 1:1000          | Goat anti rat IgG        | IF         |
| <b>Alexa Fluor® 647</b>    | Invitrogen A21450 | 1:500           | Goat anti guinea pig IgG | IF         |
| <b>Alexa Fluor® 647</b>    | Invitrogen A32733 | 1:500           | Goat anti rabbit IgG     | IF         |
| <b>HRP IgG</b>             | DAKO (P0447),     | 1:5000          | Goat anti mouse          | WB         |
| <b>HRP IgG</b>             | DAKO (P0448),     | 1:5000          | Goat anti rabbit         | WB         |

**Table S3: Primer list**

| Gene     | Forward               | Reverse               | Product Size | Tm    |
|----------|-----------------------|-----------------------|--------------|-------|
| mPDCD6   | CTTGGATCCCATGGCTGCCTA | GGGAAGCTTTTATACAATGCT | 573 base     | 66 °C |
|          | CTCCTACCG             | GAAGACC               | pair         |       |
| mOCIAD1  | CTTGAATTCGATGAATGGGA  | CCTCTCGAGTTACTCATCCCA | 1529 base    | 64 °C |
|          | GGGCTG                | AGTATC                | pair         |       |
| mPAFAH2  | CTTGAATTCGATGGGGGCCG  | GGGAAGCTTCTATAGACTAG  | 1173 base    | 66 °C |
|          | GCCAGT                | ACAGATAGTGCGG         | pair         |       |
| mHTATIP2 | CTTGAATTCGATGGCGGACAA | CCTCTCGAGTTATCACAGTTT | 729 base     | 66 °C |
|          | GGAAGC                | GGGC                  | pair         |       |
