# Supplementary material for: Analysis of the Mouse Hepatic Peroxisome Proteome—Identification of Novel Protein Constituents Using a Semi-Quantitative SWATH-MS Approach
Source: Cells. 2024 Jan 17;13(2):176. doi: 10.3390/cells13020176 (PMC10814758; doi:10.3390/cells13020176)
Supplement: Supplementary file 1 [file cells-13-00176-s001.zip]

Archive with 7 entries (7 files):
- Fig. S1.pdf
- Fig. S2.pdf
- Fig. S3.pdf
- Suppl. data_1_rev.xlsx
- Suppl. Tables S1-3.pdf
- WBs Fig. 2A_rev.pdf
- WBs Fig. 2B_rev.pdf
