# Supplementary material for: Analysis of the Mouse Hepatic Peroxisome Proteome—Identification of Novel Protein Constituents Using a Semi-Quantitative SWATH-MS Approach
Source: Cells. 2024 Jan 17;13(2):176. doi: 10.3390/cells13020176 (PMC10814758; doi:10.3390/cells13020176)
Supplement: Supplementary file 1 [file cells-13-00176-s001.zip › Suppl. data_1_rev.xlsx]

## Sheet: Quantification LM-Top_LM-PO
Peak Name	Group	t-value	p-value	Log (p-value)	Mean LM-Top	Mean LM-PO	Median LM-Top	Median LM-PO	Sigma LM-Top	Sigma LM-PO	Delta	LM-PO/LM-Top	Fold Change	Log (Fold Change)
P35762|CD81_MOUSE	CD81 antigen OS=Mus musculus OX=10090 GN=Cd81 PE=1 SV=2	2.90619	0.0271147	-1.5668	623.188	0	437.836	0	428.869	0	623.188	#DIV/0!	0	0
Q8BM55|TM214_MOUSE	Transmembrane protein 214 OS=Mus musculus OX=10090 GN=Tmem214 PE=1 SV=1	2.69229	0.0359429	-1.44439	1426.27	0	1577.24	0	1059.52	0	1426.27	#DIV/0!	0	0
P00397|COX1_MOUSE	Cytochrome c oxidase subunit 1 OS=Mus musculus OX=10090 GN=Mtco1 PE=1 SV=2	2.53791	0.0442055	-1.35452	323.546	0	349.58	0	254.971	0	323.546	#DIV/0!	0	0
Q7TMF3|NDUAC_MOUSE	NADH dehydrogenase [ubiquinone] 1 alpha subcomplex subunit 12 OS=Mus musculus OX=10090 GN=Ndufa12 PE=1 SV=2	2.07142	0.0837228	-1.07716	324.057	0	272.608	0	312.884	0	324.057	#DIV/0!	0	0
Q8K2M0|RM38_MOUSE	39S ribosomal protein L38, mitochondrial OS=Mus musculus OX=10090 GN=Mrpl38 PE=1 SV=2"	1.66973	0.146011	-0.835613	289.334	0	232.918	0	346.564	0	289.334	#DIV/0!	0	0
Q9ESB3|HRG_MOUSE	Histidine-rich glycoprotein OS=Mus musculus OX=10090 GN=Hrg PE=1 SV=2	1.65568	0.148866	-0.827204	282.51	0	221.14	0	341.261	0	282.51	#DIV/0!	0	0
Q80WW9|DDRGK_MOUSE	DDRGK domain-containing protein 1 OS=Mus musculus OX=10090 GN=Ddrgk1 PE=1 SV=2	1.54751	0.172706	-0.762692	375.809	0	242.219	0	485.696	0	375.809	#DIV/0!	0	0
P15535|B4GT1_MOUSE	Beta-1,4-galactosyltransferase 1 OS=Mus musculus OX=10090 GN=B4galt1 PE=1 SV=1"	1	0.355918	-0.44865	229.77	0	0	0	459.541	0	229.77	#DIV/0!	0	0
P10518|HEM2_MOUSE	Delta-aminolevulinic acid dehydratase OS=Mus musculus OX=10090 GN=Alad PE=1 SV=1	0	1	0	0	0	0	0	0	0	0	#DIV/0!	0	0
Q8R429|AT2A1_MOUSE	Sarcoplasmic_endoplasmic reticulum calcium ATPase 1 OS=Mus musculus OX=10090 GN=Atp2a1 PE=1 SV=1	0	1	0	0	0	0	0	0	0	0	#DIV/0!	0	0
Q9CQC9|SAR1B_MOUSE	GTP-binding protein SAR1b OS=Mus musculus OX=10090 GN=Sar1b PE=1 SV=1	-5.07722	0.00227175	-2.64364	808.912	30904.5	714.803	35697.4	595.646	11840.2	-30095.6	38.205	0.0261746	-1.58212
Q9WUB3|PYGM_MOUSE	Glycogen phosphorylase, muscle form OS=Mus musculus OX=10090 GN=Pygm PE=1 SV=3"	-2.16519	0.0735481	-1.13343	2900.3	82809.1	2781.18	82021.2	704.224	73808.9	-79908.8	28.5519	0.0350239	-1.45564
Q571E4|GALNS_MOUSE	N-acetylgalactosamine-6-sulfatase OS=Mus musculus OX=10090 GN=Galns PE=1 SV=2	-15.1076	5.3033e-06	-5.27545	783.675	18676	650.506	19573.6	472.696	2321.02	-17892.4	23.8314	0.0419615	-1.37715
P48410|ABCD1_MOUSE	ATP-binding cassette sub-family D member 1 OS=Mus musculus OX=10090 GN=Abcd1 PE=1 SV=1	-4.15092	0.00600491	-2.22149	430.306	9702.5	378.779	9157.71	399.234	4449.66	-9272.2	22.5479	0.04435	-1.35311
Q91X34|BAAT_MOUSE	Bile acid-CoA:amino acid N-acyltransferase OS=Mus musculus OX=10090 GN=Baat PE=1 SV=1	-5.7118	0.00124679	-2.90421	6687.36	149160	6446.73	155700	1691.89	49858.3	-142472	22.3047	0.0448336	-1.3484
Q8C767|PPR3B_MOUSE	Protein phosphatase 1 regulatory subunit 3B OS=Mus musculus OX=10090 GN=Ppp1r3b PE=1 SV=1	-3.20664	0.018445	-1.73412	1896.55	40310.5	1881.97	45332	223.693	23958	-38414	21.2547	0.0470484	-1.32745
Q3ULJ0|GPD1L_MOUSE	Glycerol-3-phosphate dehydrogenase 1-like protein OS=Mus musculus OX=10090 GN=Gpd1l PE=1 SV=2	-9.27972	8.85612e-05	-4.05276	266.026	5585.83	0	5180.07	532.053	1015.62	-5319.8	20.9973	0.0476252	-1.32216
Q9D826|SOX_MOUSE	Peroxisomal sarcosine oxidase OS=Mus musculus OX=10090 GN=Pipox PE=1 SV=1	-13.336	1.09981e-05	-4.95868	79380.8	1661975	79574.9	1586100	17109.8	236725	-1.58259e+06	20.9367	0.0477629	-1.32091
P00688|AMYP_MOUSE	Pancreatic alpha-amylase OS=Mus musculus OX=10090 GN=Amy2 PE=1 SV=2	-2.87521	0.0282341	-1.54923	10511.9	219875	9101.39	193635	7605.51	145434	-209363	20.9167	0.0478088	-1.32049
Q9ET01|PYGL_MOUSE	Glycogen phosphorylase, liver form OS=Mus musculus OX=10090 GN=Pygl PE=1 SV=4"	-1.93421	0.101252	-0.994596	2887.05	58401.8	2626.95	45280	999.005	57394.4	-55514.7	20.2288	0.0494344	-1.30597
P00687|AMY1_MOUSE	Alpha-amylase 1 OS=Mus musculus OX=10090 GN=Amy1 PE=1 SV=2	-2.07304	0.0835354	-1.07813	2056.71	40637.4	1516.89	38771.4	1582.12	37187.7	-38580.7	19.7584	0.0506114	-1.29575
P32020|SCP2_MOUSE	Sterol carrier protein 2 OS=Mus musculus OX=10090 GN=Scp2 PE=1 SV=3	-8.13413	0.000185511	-3.73163	50107.8	971555	46956.9	924730	12507.3	226218	-921447	19.3893	0.0515749	-1.28756
Q99P30|NUDT7_MOUSE	Peroxisomal coenzyme A diphosphatase NUDT7 OS=Mus musculus OX=10090 GN=Nudt7 PE=1 SV=2	-9.18761	9.37e-05	-4.02826	32619.9	630658	35594.7	674805	12759.5	129557	-598038	19.3335	0.0517237	-1.28631
Q9CRB3|HIUH_MOUSE	5-hydroxyisourate hydrolase OS=Mus musculus OX=10090 GN=Urah PE=1 SV=1	-6.26121	0.000770388	-3.11329	17911.9	338745	19595.6	336165	10963.9	101895	-320833	18.9118	0.0528771	-1.27673
Q9DC50|OCTC_MOUSE	Peroxisomal carnitine O-octanoyltransferase OS=Mus musculus OX=10090 GN=Crot PE=1 SV=1	-14.4839	6.78945e-06	-5.16817	15263.4	284872	13573.8	285155	6725.91	36616.2	-269609	18.6638	0.0535797	-1.271
P13707|GPDA_MOUSE	Glycerol-3-phosphate dehydrogenase [NAD(+)], cytoplasmic OS=Mus musculus OX=10090 GN=Gpd1 PE=1 SV=3"	-10.039	5.66497e-05	-4.2468	9655.34	176048	9222.06	176035	3707.74	32941.3	-166392	18.2332	0.0548451	-1.26086
P11930|NUD19_MOUSE	Nucleoside diphosphate-linked moiety X motif 19 OS=Mus musculus OX=10090 GN=Nudt19 PE=1 SV=2	-6.30377	0.000743195	-3.1289	5372.25	95500.1	5927.96	104505	2021.39	28523.4	-90127.8	17.7766	0.0562539	-1.24985
Q8BGG9|ACNT2_MOUSE	Acyl-coenzyme A amino acid N-acyltransferase 2 OS=Mus musculus OX=10090 GN=Acnat2 PE=1 SV=1	-14.4701	6.8274e-06	-5.16574	5529.94	97903.5	6405.44	100425	2634.29	12492.8	-92373.5	17.7043	0.0564835	-1.24808
P24270|CATA_MOUSE	Catalase OS=Mus musculus OX=10090 GN=Cat PE=1 SV=4	-9.62482	7.20022e-05	-4.14265	492958	8279800	516645	8452100	123936	1.61332e+06	-7.78684e+06	16.7962	0.0595374	-1.22521
Q99LC9|PEX6_MOUSE	Peroxisome assembly factor 2 OS=Mus musculus OX=10090 GN=Pex6 PE=1 SV=1	-11.0095	3.33881e-05	-4.47641	9528.62	156070	10292.3	160580	5448.48	26057.4	-146541	16.3791	0.0610535	-1.21429
Q91XC9|PEX16_MOUSE	Peroxisomal membrane protein PEX16 OS=Mus musculus OX=10090 GN=Pex16 PE=1 SV=2	-7.92461	0.000214433	-3.66871	4540.23	72901.5	4788.77	74300.8	1042.33	17221.4	-68361.3	16.0568	0.0622789	-1.20566
O35386|PAHX_MOUSE	Phytanoyl-CoA dioxygenase, peroxisomal OS=Mus musculus OX=10090 GN=Phyh PE=1 SV=1"	-7.5427	0.000281641	-3.5503	16318.6	252968	16124.5	271805	5327.47	62522.6	-236649	15.5018	0.0645087	-1.19038
Q9EPL9|ACOX3_MOUSE	Peroxisomal acyl-coenzyme A oxidase 3 OS=Mus musculus OX=10090 GN=Acox3 PE=1 SV=2	-18.2987	1.71608e-06	-5.76546	2177.01	33438.6	2363.17	33543.8	868.504	3304.6	-31261.6	15.3599	0.0651046	-1.18639
Q9DBM2|ECHP_MOUSE	Peroxisomal bifunctional enzyme OS=Mus musculus OX=10090 GN=Ehhadh PE=1 SV=4	-14.725	6.16364e-06	-5.21016	462630	6975400	458475	6787700	43481.2	883516	-6512770	15.0777	0.0663231	-1.17834
Q9WU19|HAOX1_MOUSE	Hydroxyacid oxidase 1 OS=Mus musculus OX=10090 GN=Hao1 PE=1 SV=1	-13.0041	1.27365e-05	-4.89495	12785	184955	12484.4	182410	3597.24	26233.8	-172170	14.4665	0.0691252	-1.16036
P51660|DHB4_MOUSE	Peroxisomal multifunctional enzyme type 2 OS=Mus musculus OX=10090 GN=Hsd17b4 PE=1 SV=3	-12.2081	1.83825e-05	-4.7356	391955	5667800	380875	5478900	103577	858092	-5275845	14.4603	0.0691547	-1.16018
Q921H8|THIKA_MOUSE	3-ketoacyl-CoA thiolase A, peroxisomal OS=Mus musculus OX=10090 GN=Acaa1a PE=1 SV=1"	-6.44054	0.000662974	-3.1785	22129.7	318835	23928.4	300640	10253.1	91564.6	-296705	14.4076	0.0694079	-1.15859
Q9QXE0|HACL1_MOUSE	2-hydroxyacyl-CoA lyase 1 OS=Mus musculus OX=10090 GN=Hacl1 PE=1 SV=2	-11.2432	2.9585e-05	-4.52893	243932	3466475	235210	3453600	71483.5	568769	-3.22254e+06	14.2108	0.070369	-1.15262
P34914|HYES_MOUSE	Bifunctional epoxide hydrolase 2 OS=Mus musculus OX=10090 GN=Ephx2 PE=1 SV=2	-8.96959	0.000107299	-3.9694	64545.8	914228	63472.1	895700	15721.5	188805	-849682	14.164	0.0706014	-1.15119
Q9QXY9|PEX3_MOUSE	Peroxisomal biogenesis factor 3 OS=Mus musculus OX=10090 GN=Pex3 PE=1 SV=1	-3.23821	0.0177267	-1.75137	981.352	13824.8	749.481	16136.5	685.35	7902.77	-12843.4	14.0875	0.070985	-1.14883
Q9R0A0|PEX14_MOUSE	Peroxisomal membrane protein PEX14 OS=Mus musculus OX=10090 GN=Pex14 PE=1 SV=1	-6.90807	0.000454934	-3.34205	5213	73417	5439.33	72748.6	2485.31	19589.2	-68204	14.0834	0.0710053	-1.14871
Q8VDG7|PAFA2_MOUSE	Platelet-activating factor acetylhydrolase 2, cytoplasmic OS=Mus musculus OX=10090 GN=Pafah2 PE=1 SV=2"	-14.6105	6.45208e-06	-5.1903	6331.9	88919.2	5532.6	91111.6	3130.82	10863	-82587.3	14.0431	0.0712096	-1.14746
Q9R0H0|ACOX1_MOUSE	Peroxisomal acyl-coenzyme A oxidase 1 OS=Mus musculus OX=10090 GN=Acox1 PE=1 SV=5	-6.55036	0.000605693	-3.21775	166002	2329500	166925	2082000	52833.7	658457	-2.1635e+06	14.0329	0.071261	-1.14715
Q8VCH0|THIKB_MOUSE	3-ketoacyl-CoA thiolase B, peroxisomal OS=Mus musculus OX=10090 GN=Acaa1b PE=1 SV=1"	-5.41288	0.00164378	-2.78416	186528	2405650	197085	2267850	43077	818809	-2.21912e+06	12.897	0.0775373	-1.11049
Q9DCN1|NUD12_MOUSE	NAD-capped RNA hydrolase NUDT12 OS=Mus musculus OX=10090 GN=Nudt12 PE=1 SV=1	-17.4953	2.23687e-06	-5.65036	6214.2	77994.3	5503.64	77997.3	2566.32	7794.01	-71780.1	12.551	0.0796751	-1.09868
Q80XL6|ACD11_MOUSE	Acyl-CoA dehydrogenase family member 11 OS=Mus musculus OX=10090 GN=Acad11 PE=1 SV=2	-8.17419	0.000180508	-3.7435	143185	1774575	137490	1773850	35329.4	397590	-1631390	12.3936	0.0806869	-1.0932
Q9DBK0|ACO12_MOUSE	Acetyl-coenzyme A thioesterase OS=Mus musculus OX=10090 GN=Acot12 PE=1 SV=1	-4.7525	0.00315059	-2.50161	4416.88	53573.4	4786.82	55977.5	2331.84	20554.7	-49156.6	12.1293	0.0824453	-1.08383
Q2TPA8|HSDL2_MOUSE	Hydroxysteroid dehydrogenase-like protein 2 OS=Mus musculus OX=10090 GN=Hsdl2 PE=1 SV=1	-7.55121	0.0002799	-3.553	7425.13	90036.2	7829.01	89513.5	1107.4	21852.2	-82611	12.1259	0.0824683	-1.08371
Q99MZ7|PECR_MOUSE	Peroxisomal trans-2-enoyl-CoA reductase OS=Mus musculus OX=10090 GN=Pecr PE=1 SV=1	-10.5231	4.32771e-05	-4.36374	84035.6	991228	74185.1	977735	30159.4	169762	-907192	11.7953	0.0847793	-1.07171
Q5BL07|PEX1_MOUSE	Peroxisome biogenesis factor 1 OS=Mus musculus OX=10090 GN=Pex1 PE=1 SV=2	-7.89964	0.000218215	-3.66112	10556.6	124490	9842.54	127969	6215.98	28167.4	-113933	11.7926	0.084799	-1.07161
O09174|AMACR_MOUSE	Alpha-methylacyl-CoA racemase OS=Mus musculus OX=10090 GN=Amacr PE=1 SV=4	-10.1954	5.18619e-05	-4.28515	26512	304060	28490.4	312460	6898.64	54006.7	-277548	11.4688	0.0871934	-1.05952
Q8BWN8|ACOT4_MOUSE	Peroxisomal succinyl-coenzyme A thioesterase OS=Mus musculus OX=10090 GN=Acot4 PE=1 SV=1	-14.6668	6.30829e-06	-5.20009	34198.6	389612	34238.5	386810	7830.07	47828.2	-355414	11.3926	0.087776	-1.05662
Q8R1M2|H2AJ_MOUSE	Histone H2A.J OS=Mus musculus OX=10090 GN=H2aj PE=1 SV=1	-1.38702	0.214767	-0.668033	30.3107	338.139	0	214.3	60.6214	439.712	-307.828	11.1558	0.0896398	-1.0475
Q9CYV5|TM135_MOUSE	Transmembrane protein 135 OS=Mus musculus OX=10090 GN=Tmem135 PE=2 SV=1	-9.21202	9.23053e-05	-4.03477	15597.4	173190	15331.6	177230	5220.71	33813.9	-157593	11.1038	0.0900596	-1.04547
Q9QXD1|ACOX2_MOUSE	Peroxisomal acyl-coenzyme A oxidase 2 OS=Mus musculus OX=10090 GN=Acox2 PE=1 SV=2	-10.787	3.75439e-05	-4.42546	62674	682228	64057.5	694440	11755.6	114267	-619554	10.8853	0.0918667	-1.03684
Q9DBA6|TYSD1_MOUSE	Peroxisomal leader peptide-processing protease OS=Mus musculus OX=10090 GN=Tysnd1 PE=1 SV=1	-9.38979	8.28424e-05	-4.08175	4393.17	47520.8	4551.76	46080.9	742.044	9156.06	-43127.6	10.817	0.0924472	-1.03411
Q9WV68|DECR2_MOUSE	Peroxisomal 2,4-dienoyl-CoA reductase [(3E)-enoyl-CoA-producing] OS=Mus musculus OX=10090 GN=Decr2 PE=1 SV=1"	-9.45763	7.95307e-05	-4.09947	164288	1752100	173460	1682150	43150.8	332990	-1.58781e+06	10.6648	0.0937661	-1.02795
O35423|SPYA_MOUSE	Serine--pyruvate aminotransferase, mitochondrial OS=Mus musculus OX=10090 GN=Agxt PE=1 SV=3"	-13.4155	1.06235e-05	-4.97373	55505.5	572790	56511.1	579990	17330.9	75145	-517285	10.3195	0.0969037	-1.01366
O09012|PEX5_MOUSE	Peroxisomal targeting signal 1 receptor OS=Mus musculus OX=10090 GN=Pex5 PE=1 SV=2	-10.3826	4.67384e-05	-4.33033	1903.05	19574.3	1546.82	20915	1146.37	3205.18	-17671.3	10.2858	0.0972215	-1.01224
A2AKK5|ACNT1_MOUSE	Acyl-coenzyme A amino acid N-acyltransferase 1 OS=Mus musculus OX=10090 GN=Acnat1 PE=1 SV=1	-6.04216	0.000929714	-3.03165	1872.27	19223.9	2000.14	17767.5	634.105	5708.42	-17351.6	10.2677	0.0973926	-1.01147
Q99KR3|LACB2_MOUSE	Endoribonuclease LACTB2 OS=Mus musculus OX=10090 GN=Lactb2 PE=1 SV=1	-9.30901	8.69957e-05	-4.0605	15550.1	158975	13832.5	163240	6158.52	30192.5	-143425	10.2234	0.0978146	-1.0096
Q9DBN5|LONP2_MOUSE	Lon protease homolog 2, peroxisomal OS=Mus musculus OX=10090 GN=Lonp2 PE=1 SV=1"	-8.17458	0.00018046	-3.74362	20914.5	212078	21339.6	211720	2168.3	46719.8	-191163	10.1402	0.0986171	-1.00605
P50431|GLYC_MOUSE	Serine hydroxymethyltransferase, cytosolic OS=Mus musculus OX=10090 GN=Shmt1 PE=1 SV=3"	-0.970608	0.369228	-0.432705	2064.27	20795.1	1406.72	1689.95	1644.23	38561	-18730.8	10.0738	0.0992671	-1.00319
P55096|ABCD3_MOUSE	ATP-binding cassette sub-family D member 3 OS=Mus musculus OX=10090 GN=Abcd3 PE=1 SV=2	-8.89441	0.000112508	-3.94882	119240	1188960	122176	1182120	34814.7	238005	-1.06972e+06	9.97115	0.100289	-0.998745
O35678|MGLL_MOUSE	Monoglyceride lipase OS=Mus musculus OX=10090 GN=Mgll PE=1 SV=1	-2.15665	0.0744201	-1.12831	187.909	1847.7	175.406	1892.91	217.937	1523.72	-1659.79	9.83294	0.101699	-0.992683
Q99LB2|DHRS4_MOUSE	Dehydrogenase_reductase SDR family member 4 OS=Mus musculus OX=10090 GN=Dhrs4 PE=1 SV=3	-10.3482	4.76358e-05	-4.32207	80932.6	775838	91978	776185	30051.6	130900	-694905	9.58621	0.104316	-0.981647
P07146|TRY2_MOUSE	Anionic trypsin-2 OS=Mus musculus OX=10090 GN=Prss2 PE=1 SV=1	-2.6923	0.0359424	-1.44439	1190.09	11330.5	1075.33	13996.3	642.686	7505.4	-10140.4	9.52067	0.105035	-0.978668
Q8C7E7|STBD1_MOUSE	Starch-binding domain-containing protein 1 OS=Mus musculus OX=10090 GN=Stbd1 PE=1 SV=1	-2.406	0.052861	-1.27686	3369.29	30671	3443.2	24252	1650.66	22634.6	-27301.7	9.10311	0.109853	-0.95919
Q9QYR7|ACOT3_MOUSE	Acyl-coenzyme A thioesterase 3 OS=Mus musculus OX=10090 GN=Acot3 PE=1 SV=1	-7.26976	0.000344686	-3.46258	4452.1	40527.7	4357.21	38913.9	1915.62	9738.22	-36075.6	9.10307	0.109853	-0.959188
O88844|IDHC_MOUSE	Isocitrate dehydrogenase [NADP] cytoplasmic OS=Mus musculus OX=10090 GN=Idh1 PE=1 SV=2	-5.65418	0.00131394	-2.88142	43282.7	380660	43997.7	374930	16612.8	118175	-337377	8.79473	0.113704	-0.944223
O70579|PM34_MOUSE	Peroxisomal membrane protein PMP34 OS=Mus musculus OX=10090 GN=Slc25a17 PE=1 SV=1	-8.03055	0.000199205	-3.7007	336.302	2818.76	260.884	2800.72	407.39	465.049	-2482.46	8.38163	0.119309	-0.923328
P42925|PXMP2_MOUSE	Peroxisomal membrane protein 2 OS=Mus musculus OX=10090 GN=Pxmp2 PE=1 SV=2	-5.51595	0.00149254	-2.82607	32524.7	272110	34176.3	250830	6996.3	86587.9	-239585	8.36625	0.119528	-0.922531
Q9DCM2|GSTK1_MOUSE	Glutathione S-transferase kappa 1 OS=Mus musculus OX=10090 GN=Gstk1 PE=1 SV=3	-7.17265	0.000370931	-3.43071	25942	214065	25684.1	200490	8486.77	51764.5	-188123	8.25169	0.121187	-0.916543
P05208|CEL2A_MOUSE	Chymotrypsin-like elastase family member 2A OS=Mus musculus OX=10090 GN=Cela2a PE=1 SV=1	-3.61148	0.0112111	-1.95035	2119.94	16752.4	1872.24	16333.6	1285.88	8000.65	-14632.5	7.90231	0.126545	-0.897754
P98192|GNPAT_MOUSE	Dihydroxyacetone phosphate acyltransferase OS=Mus musculus OX=10090 GN=Gnpat PE=1 SV=1	-9.56338	7.46689e-05	-4.12686	1208.66	9506.43	1025.42	9818.21	896.763	1485.65	-8297.77	7.86527	0.127141	-0.895714
Q8BGC4|PTGR3_MOUSE	Prostaglandin reductase-3 OS=Mus musculus OX=10090 GN=Zadh2 PE=1 SV=1	-11.0261	3.30989e-05	-4.48019	15337.3	120328	14599.3	122900	5674.43	18178.9	-104990	7.84542	0.127463	-0.894616
Q61285|ABCD2_MOUSE	ATP-binding cassette sub-family D member 2 OS=Mus musculus OX=10090 GN=Abcd2 PE=1 SV=1	-12.2815	1.77546e-05	-4.75069	15836	124178	14633	123390	4928.77	16940.7	-108342	7.84147	0.127527	-0.894397
P25688|URIC_MOUSE	Uricase OS=Mus musculus OX=10090 GN=Uox PE=1 SV=2	-12.5184	1.58914e-05	-4.79884	592342	4633700	623990	4685100	185454	618461	-4.04136e+06	7.82267	0.127834	-0.893355
Q6P6M5|PX11C_MOUSE	Peroxisomal membrane protein 11C OS=Mus musculus OX=10090 GN=Pex11g PE=1 SV=2	-7.00697	0.000421201	-3.37551	4253.3	33269.5	4092.79	33683.7	1962.28	8046.27	-29016.2	7.82205	0.127844	-0.893321
Q8CHK3|MBOA7_MOUSE	Lysophospholipid acyltransferase 7 OS=Mus musculus OX=10090 GN=Mboat7 PE=1 SV=1	-1.61143	0.158213	-0.800758	52.0945	406.355	0	317.135	104.189	427.163	-354.261	7.80035	0.128199	-0.892114
Q9D1G2|PMVK_MOUSE	Phosphomevalonate kinase OS=Mus musculus OX=10090 GN=Pmvk PE=1 SV=3	-1.92087	0.103142	-0.986564	68.7075	535.319	0	580.266	137.415	465.996	-466.612	7.79127	0.128349	-0.891608
Q9Z211|PX11A_MOUSE	Peroxisomal membrane protein 11A OS=Mus musculus OX=10090 GN=Pex11a PE=1 SV=1	-2.12799	0.0774238	-1.11113	2829.52	22022.3	2928.56	20813.3	838.058	18018.9	-19192.8	7.78305	0.128484	-0.89115
Q61878|PRG2_MOUSE	Bone marrow proteoglycan OS=Mus musculus OX=10090 GN=Prg2 PE=1 SV=1	-3.85151	0.00844513	-2.07339	1006.66	7799.48	988.895	7768.1	506.355	3490.82	-6792.81	7.74784	0.129068	-0.889181
Q9Z210|PX11B_MOUSE	Peroxisomal membrane protein 11B OS=Mus musculus OX=10090 GN=Pex11b PE=1 SV=1	-6.72272	0.000526864	-3.2783	3448.72	26613.3	3169.54	25341.6	1802.01	6651.65	-23164.6	7.71685	0.129586	-0.88744
P58137|ACOT8_MOUSE	Acyl-coenzyme A thioesterase 8 OS=Mus musculus OX=10090 GN=Acot8 PE=1 SV=1	-9.80096	6.49483e-05	-4.18743	4799.31	36423.7	5263.8	36039.4	2215.47	6061.11	-31624.4	7.58936	0.131763	-0.880205
Q8VCR7|ABHEB_MOUSE	Protein ABHD14B OS=Mus musculus OX=10090 GN=Abhd14b PE=1 SV=1	-5.08168	0.00226181	-2.64554	7239.33	53916	5056.8	51410.6	6135.73	17315.6	-46676.6	7.44764	0.134271	-0.872019
P12815|PDCD6_MOUSE	Programmed cell death protein 6 OS=Mus musculus OX=10090 GN=Pdcd6 PE=1 SV=2	-4.29469	0.00512248	-2.29052	467.334	3405.39	462.246	3879.44	119.981	1362.96	-2938.06	7.28685	0.137233	-0.86254
Q99MD6|TRXR3_MOUSE	Thioredoxin reductase 3 OS=Mus musculus OX=10090 GN=Txnrd3 PE=1 SV=3	-3.12876	0.0203567	-1.69129	478.336	3471.59	499.38	3449.26	173.621	1905.49	-2993.26	7.25765	0.137786	-0.860796
P14152|MDHC_MOUSE	Malate dehydrogenase, cytoplasmic OS=Mus musculus OX=10090 GN=Mdh1 PE=1 SV=3"	-9.03441	0.00010303	-3.98703	16673.9	117310	15591.9	122760	11303.8	19197.7	-100636	7.03553	0.142136	-0.847297
Q8BGI5|PEX26_MOUSE	Peroxisome assembly protein 26 OS=Mus musculus OX=10090 GN=Pex26 PE=1 SV=2	-5.13603	0.00214433	-2.66871	2093.61	14335.4	1372.7	14795.8	1897.72	4373.01	-12241.8	6.84722	0.146045	-0.835514
P15116|CADH2_MOUSE	Cadherin-2 OS=Mus musculus OX=10090 GN=Cdh2 PE=1 SV=2	-2.07978	0.0827596	-1.08218	56.7321	379.045	0	428.685	113.464	288.434	-322.313	6.68132	0.149671	-0.824863
P09405|NUCL_MOUSE	Nucleolin OS=Mus musculus OX=10090 GN=Ncl PE=1 SV=2	-4.36755	0.0047316	-2.32499	584.451	3876.94	515.838	3992.52	263.58	1484.49	-3292.49	6.63348	0.150751	-0.821741
Q8VC48|PEX12_MOUSE	Peroxisome assembly protein 12 OS=Mus musculus OX=10090 GN=Pex12 PE=1 SV=1	-3.34259	0.0155616	-1.80795	773.624	5120.4	778.215	4998.17	537.121	2544.78	-4346.78	6.61872	0.151087	-0.820774
P49290|PERE_MOUSE	Eosinophil peroxidase OS=Mus musculus OX=10090 GN=Epx PE=1 SV=2	-3.30963	0.0162121	-1.79016	2456.18	16243.8	2559.25	16654.5	729.861	8299.78	-13787.6	6.61343	0.151208	-0.820427
Q9CQ92|FIS1_MOUSE	Mitochondrial fission 1 protein OS=Mus musculus OX=10090 GN=Fis1 PE=1 SV=1	-6.68294	0.000543957	-3.26444	2545.08	16809.3	2531.7	16336.7	464.261	4243.53	-14264.2	6.60463	0.151409	-0.819849
Q9JJW0|PXMP4_MOUSE	Peroxisomal membrane protein 4 OS=Mus musculus OX=10090 GN=Pxmp4 PE=1 SV=3	-6.57187	0.000595152	-3.22537	10584.6	69542.5	10020.8	69437.9	5257.42	17155	-58957.9	6.57016	0.152203	-0.817576
Q8C0I1|ADAS_MOUSE	Alkyldihydroxyacetonephosphate synthase, peroxisomal OS=Mus musculus OX=10090 GN=Agps PE=1 SV=1"	-5.52023	0.00148661	-2.8278	1774.03	11606.2	1811.15	10345.8	437.823	3535.23	-9832.17	6.54229	0.152852	-0.81573
P11679|K2C8_MOUSE	Keratin, type II cytoskeletal 8 OS=Mus musculus OX=10090 GN=Krt8 PE=1 SV=4"	-3.61274	0.0111941	-1.95101	4932.43	32237.2	3182.86	28504.1	4351.29	14476	-27304.7	6.53576	0.153004	-0.815296
Q6NXH9|K2C73_MOUSE	Keratin, type II cytoskeletal 73 OS=Mus musculus OX=10090 GN=Krt73 PE=1 SV=1"	-2.70274	0.0354468	-1.45042	1071.66	6713.34	556.125	6863.99	1165.63	4008.77	-5641.68	6.26444	0.159631	-0.796882
B1AUE5|PEX10_MOUSE	Peroxisome biogenesis factor 10 OS=Mus musculus OX=10090 GN=Pex10 PE=2 SV=1	-3.83905	0.00856839	-2.0671	2602.37	16194.4	2831.18	14513.1	525.317	7061.42	-13592	6.22295	0.160695	-0.793997
P53657|KPYR_MOUSE	Pyruvate kinase PKLR OS=Mus musculus OX=10090 GN=Pklr PE=1 SV=1	-0.960813	0.37375	-0.427419	1232.55	7586.44	1077.06	1146.73	1029.8	13185.9	-6353.89	6.15507	0.162468	-0.789233
Q8CI51|PDLI5_MOUSE	PDZ and LIM domain protein 5 OS=Mus musculus OX=10090 GN=Pdlim5 PE=1 SV=4	-3.70902	0.00998119	-2.00082	539.551	3272.98	693.653	2763.36	366.89	1427.54	-2733.43	6.06612	0.16485	-0.782911
Q9Z2G9|HTAI2_MOUSE	Oxidoreductase HTATIP2 OS=Mus musculus OX=10090 GN=Htatip2 PE=1 SV=3	-3.45622	0.0135297	-1.86871	3550.59	21385	2569.12	24257.6	2552.15	9999.66	-17834.5	6.02295	0.166032	-0.779809
P62702|RS4X_MOUSE	40S ribosomal protein S4, X isoform OS=Mus musculus OX=10090 GN=Rps4x PE=1 SV=2"	-2.8311	0.0299144	-1.52412	214.976	1268.01	153.097	1374.22	268.012	693.944	-1053.03	5.89836	0.169539	-0.770731
Q9WUR2|ECI2_MOUSE	Enoyl-CoA delta isomerase 2 OS=Mus musculus OX=10090 GN=Eci2 PE=1 SV=2	-8.3561	0.000159663	-3.7968	18824.7	109178	18893.1	106730	8409.09	19923.8	-90353.1	5.79971	0.172422	-0.763406
O35381|AN32A_MOUSE	Acidic leucine-rich nuclear phosphoprotein 32 family member A OS=Mus musculus OX=10090 GN=Anp32a PE=1 SV=1	-2.00188	0.0921854	-1.03534	1560.94	9048.05	1376.37	8579.23	751.08	7442.27	-7487.11	5.79656	0.172516	-0.76317
Q8BWP5|TTPA_MOUSE	Alpha-tocopherol transfer protein OS=Mus musculus OX=10090 GN=Ttpa PE=1 SV=1	-4.05767	0.00666803	-2.176	3819.79	21876.8	2502.27	22944.8	3280.63	8273.5	-18057	5.72722	0.174605	-0.757944
Q9NYQ2|HAOX2_MOUSE	Hydroxyacid oxidase 2 OS=Mus musculus OX=10090 GN=Hao2 PE=1 SV=1	-9.33722	8.55187e-05	-4.06794	2414.96	13780.7	2769.52	13706.8	1160.72	2139.99	-11365.8	5.70641	0.175242	-0.756363
Q5XG73|ACBD5_MOUSE	Acyl-CoA-binding domain-containing protein 5 OS=Mus musculus OX=10090 GN=Acbd5 PE=1 SV=1	-4.56506	0.00383041	-2.41675	11882.9	65815	11613.2	68290.7	4679.33	23160.2	-53932.1	5.53862	0.18055	-0.743401
Q8K1N1|PLPL8_MOUSE	Calcium-independent phospholipase A2-gamma OS=Mus musculus OX=10090 GN=Pnpla8 PE=1 SV=1	-5.01266	0.00242166	-2.61589	4901.42	26833.9	5045.98	27596.4	1887.09	8544.95	-21932.5	5.47472	0.182658	-0.738362
P62137|PP1A_MOUSE	Serine_threonine-protein phosphatase PP1-alpha catalytic subunit OS=Mus musculus OX=10090 GN=Ppp1ca PE=1 SV=1	-2.10497	0.0799261	-1.09731	1685.04	9194.66	1753.76	9191.03	672.795	7103.33	-7509.63	5.45666	0.183262	-0.736927
Q9CQD1|RAB5A_MOUSE	Ras-related protein Rab-5A OS=Mus musculus OX=10090 GN=Rab5a PE=1 SV=1	-5.63245	0.00134033	-2.87279	427.148	2310.22	379.909	2398.76	303.975	595.563	-1883.08	5.40849	0.184895	-0.733076
P97364|SPS2_MOUSE	Selenide, water dikinase 2 OS=Mus musculus OX=10090 GN=Sephs2 PE=1 SV=3"	-3.38971	0.0146809	-1.83325	3322.72	17954.8	3470.68	19257.2	1233.96	8544.59	-14632.1	5.40364	0.18506	-0.732687
Q9R0P3|ESTD_MOUSE	S-formylglutathione hydrolase OS=Mus musculus OX=10090 GN=Esd PE=1 SV=1	-1.83347	0.116427	-0.933946	448.554	2234.33	431.654	2185.18	210.02	1936.62	-1785.78	4.98119	0.200755	-0.697333
P06151|LDHA_MOUSE	L-lactate dehydrogenase A chain OS=Mus musculus OX=10090 GN=Ldha PE=1 SV=3	-9.35562	8.45703e-05	-4.07278	21707.3	107101	18626.8	104763	8296.65	16260.9	-85394.2	4.93389	0.20268	-0.69319
O08917|FLOT1_MOUSE	Flotillin-1 OS=Mus musculus OX=10090 GN=Flot1 PE=1 SV=1	-1.39835	0.211511	-0.674666	479.656	2356.44	454.92	1283.89	311.279	2666.18	-1876.79	4.91278	0.203551	-0.691327
P97425|ECP2_MOUSE	Eosinophil cationic protein 2 OS=Mus musculus OX=10090 GN=Ear2 PE=2 SV=1	-0.937935	0.38448	-0.415126	247.342	1184.43	198.274	293.386	248.899	1982.64	-937.091	4.78864	0.208827	-0.680213
Q91V64|ISOC1_MOUSE	Isochorismatase domain-containing protein 1 OS=Mus musculus OX=10090 GN=Isoc1 PE=1 SV=1	-3.59777	0.011397	-1.94321	2579.54	12325.6	2085.01	11116.5	1472.89	5213.77	-9746.04	4.7782	0.209284	-0.679265
P47934|CACP_MOUSE	Carnitine O-acetyltransferase OS=Mus musculus OX=10090 GN=Crat PE=1 SV=3	-9.78177	6.56764e-05	-4.18259	5439	25760.3	5424.62	25375.2	2046.51	3615.98	-20321.3	4.73623	0.211138	-0.675433
Q07076|ANXA7_MOUSE	Annexin A7 OS=Mus musculus OX=10090 GN=Anxa7 PE=1 SV=2	-1.44217	0.199348	-0.700388	714.827	3370.78	792.29	2139	186.265	3678.56	-2655.95	4.71551	0.212066	-0.673529
Q99KB8|GLO2_MOUSE	Hydroxyacylglutathione hydrolase, mitochondrial OS=Mus musculus OX=10090 GN=Hagh PE=1 SV=2"	-5.49702	0.00151909	-2.81842	7508.9	34825	8218.98	36816.1	4215.25	9000.31	-27316.1	4.63783	0.215618	-0.666315
Q8CC88|VWA8_MOUSE	von Willebrand factor A domain-containing protein 8 OS=Mus musculus OX=10090 GN=Vwa8 PE=1 SV=2	-10.8425	3.64544e-05	-4.43825	23100	106115	21762.8	105875	7731.1	13218	-83014.8	4.59371	0.217689	-0.662164
Q8JZS0|LIN7A_MOUSE	Protein lin-7 homolog A OS=Mus musculus OX=10090 GN=Lin7a PE=1 SV=2	-2.26216	0.0643568	-1.19141	808.332	3707.14	818.053	3170.68	168.466	2557.32	-2898.8	4.58616	0.218048	-0.661449
Q8VBT2|SDHL_MOUSE	L-serine dehydratase_L-threonine deaminase OS=Mus musculus OX=10090 GN=Sds PE=1 SV=3	-2.56113	0.0428434	-1.36812	3357.71	15351.2	2917.27	16976.3	1661.96	9217.15	-11993.5	4.57193	0.218726	-0.660099
Q9CR35|CTRB1_MOUSE	Chymotrypsinogen B OS=Mus musculus OX=10090 GN=Ctrb1 PE=1 SV=1	-2.43667	0.0507003	-1.29499	1374.38	6273.72	1176.47	6397.49	1130.07	3859.29	-4899.34	4.56477	0.219069	-0.659419
Q61792|LASP1_MOUSE	LIM and SH3 domain protein 1 OS=Mus musculus OX=10090 GN=Lasp1 PE=1 SV=1	-2.71749	0.0347586	-1.45894	1143.41	5119.66	959.118	5366.57	811.75	2811.58	-3976.25	4.47753	0.223337	-0.651039
Q8R1G2|CMBL_MOUSE	Carboxymethylenebutenolidase homolog OS=Mus musculus OX=10090 GN=Cmbl PE=1 SV=1	-2.26283	0.0642975	-1.19181	1645.2	7134.96	1587.72	8148.27	333.526	4840.64	-5489.76	4.33683	0.230583	-0.637172
P09411|PGK1_MOUSE	Phosphoglycerate kinase 1 OS=Mus musculus OX=10090 GN=Pgk1 PE=1 SV=4	-2.25515	0.0649798	-1.18722	6151.57	25939.9	6233.47	25217.7	4387.58	16992.1	-19788.3	4.21679	0.237147	-0.624982
Q8BI84|TGO1_MOUSE	Transport and Golgi organization protein 1 homolog OS=Mus musculus OX=10090 GN=Mia3 PE=1 SV=2	-2.49285	0.0469808	-1.32808	252.752	1057.11	211.195	918.626	299.639	571.551	-804.358	4.1824	0.239097	-0.621425
Q99J47|DRS7B_MOUSE	Dehydrogenase_reductase SDR family member 7B OS=Mus musculus OX=10090 GN=Dhrs7b PE=1 SV=1	-5.12522	0.00216712	-2.66412	6507.4	26805.7	6188.48	24710.1	1484.85	7780.53	-20298.3	4.11927	0.242762	-0.61482
Q9WUA5|EPM2A_MOUSE	Laforin OS=Mus musculus OX=10090 GN=Epm2a PE=1 SV=2	-1.4358	0.201074	-0.696643	577.341	2341.98	464.85	1668.43	277.407	2442.35	-1764.64	4.05649	0.246519	-0.60815
Q9EST5|AN32B_MOUSE	Acidic leucine-rich nuclear phosphoprotein 32 family member B OS=Mus musculus OX=10090 GN=Anp32b PE=1 SV=1	-9.31192	8.68421e-05	-4.06127	21255.2	85226.3	19908.5	84581.9	5651.54	12523.5	-63971.1	4.00967	0.249397	-0.603108
Q64339|ISG15_MOUSE	Ubiquitin-like protein ISG15 OS=Mus musculus OX=10090 GN=Isg15 PE=1 SV=4	-1.90288	0.105746	-0.975734	2783.18	10690.3	2342.2	10773.6	1276.87	8212.04	-7907.16	3.84105	0.260346	-0.58445
Q9D0K1|PEX13_MOUSE	Peroxisomal membrane protein PEX13 OS=Mus musculus OX=10090 GN=Pex13 PE=1 SV=1	-1.25251	0.256991	-0.590083	661.366	2535.71	360.454	1663.26	672.653	2916.37	-1874.34	3.83405	0.260821	-0.583657
P63037|DNJA1_MOUSE	DnaJ homolog subfamily A member 1 OS=Mus musculus OX=10090 GN=Dnaja1 PE=1 SV=1	-3.11741	0.0206529	-1.68502	2996.4	11143.7	2868.37	12485.3	1326.29	5055.91	-8147.32	3.71903	0.268887	-0.57043
Q9CRD0|OCAD1_MOUSE	OCIA domain-containing protein 1 OS=Mus musculus OX=10090 GN=Ociad1 PE=1 SV=1	-4.42534	0.00444535	-2.35209	3307.05	12259.5	2926.22	12639.8	1980.96	3527.87	-8952.44	3.70708	0.269754	-0.569032
P47757|CAPZB_MOUSE	F-actin-capping protein subunit beta OS=Mus musculus OX=10090 GN=Capzb PE=1 SV=3	-7.30638	0.000335349	-3.4745	3232.53	11969.7	3447.58	12345.1	1540.9	1829.11	-8737.17	3.70289	0.27006	-0.56854
Q811U4|MFN1_MOUSE	Mitofusin-1 OS=Mus musculus OX=10090 GN=Mfn1 PE=1 SV=3	-1.91416	0.104105	-0.982527	794.279	2870.47	749.918	2925.62	223.528	2157.74	-2076.19	3.61392	0.276708	-0.557979
Q9D5T0|ATAD1_MOUSE	Outer mitochondrial transmembrane helix translocase OS=Mus musculus OX=10090 GN=Atad1 PE=1 SV=1	-6.09509	0.000888008	-3.05158	13175.3	47461.5	13689.9	45405	3272.8	10763.9	-34286.2	3.60231	0.2776	-0.556581
Q3UZZ6|ST1D1_MOUSE	Sulfotransferase 1 family member D1 OS=Mus musculus OX=10090 GN=Sult1d1 PE=1 SV=1	-1.75158	0.130406	-0.884702	365.017	1312.12	286.687	1317.61	225.284	1057.71	-947.104	3.59468	0.278189	-0.555661
Q62093|SRSF2_MOUSE	Serine_arginine-rich splicing factor 2 OS=Mus musculus OX=10090 GN=Srsf2 PE=1 SV=4	-2.38409	0.0544635	-1.26389	1242.16	4453.77	1123.76	4720.97	808.281	2570.1	-3211.62	3.58551	0.2789	-0.554551
P52840|ST1A1_MOUSE	Sulfotransferase 1A1 OS=Mus musculus OX=10090 GN=Sult1a1 PE=1 SV=1	-2.84731	0.0292848	-1.53336	6226.38	21553.8	5420.89	22501.9	3261.86	10260.2	-15327.4	3.46168	0.288877	-0.539287
Q922Z0|OXDD_MOUSE	D-aspartate oxidase OS=Mus musculus OX=10090 GN=Ddo PE=1 SV=1	-10.1586	5.29457e-05	-4.27617	1048.85	3607.77	1003.36	3479.38	223.167	451.669	-2558.92	3.43974	0.29072	-0.536525
P41216|ACSL1_MOUSE	Long-chain-fatty-acid--CoA ligase 1 OS=Mus musculus OX=10090 GN=Acsl1 PE=1 SV=2	-6.65116	0.000558072	-3.25331	146572	502325	157200	496850	33969	101438	-355752	3.42714	0.291788	-0.534932
Q61147|CERU_MOUSE	Ceruloplasmin OS=Mus musculus OX=10090 GN=Cp PE=1 SV=2	-2.05312	0.0858699	-1.06616	131.06	442.695	56.24	384.691	194.5	233.078	-311.635	3.3778	0.29605	-0.528635
P29788|VTNC_MOUSE	Vitronectin OS=Mus musculus OX=10090 GN=Vtn PE=1 SV=2	-1.38772	0.214562	-0.668447	1771.76	5967.94	2085.42	5725.17	1005.93	5963.32	-4196.18	3.36836	0.29688	-0.527419
Q9D1N9|RM21_MOUSE	39S ribosomal protein L21, mitochondrial OS=Mus musculus OX=10090 GN=Mrpl21 PE=1 SV=1"	-1.09113	0.317081	-0.49883	758.157	2480.35	614.984	1161.35	530.699	3111.77	-1722.19	3.27155	0.305665	-0.514754
Q9DCL9|PUR6_MOUSE	Multifunctional protein ADE2 OS=Mus musculus OX=10090 GN=Paics PE=1 SV=4	-3.12341	0.0204958	-1.68833	6197.37	20218.3	2646.1	19240	7885.95	4291.42	-14021	3.2624	0.306522	-0.513538
P60335|PCBP1_MOUSE	Poly(rC)-binding protein 1 OS=Mus musculus OX=10090 GN=Pcbp1 PE=1 SV=1	-4.0866	0.00645392	-2.19018	918.713	2990.46	963.924	2867.25	633.091	791.984	-2071.75	3.25506	0.307214	-0.512559
O70400|PDLI1_MOUSE	PDZ and LIM domain protein 1 OS=Mus musculus OX=10090 GN=Pdlim1 PE=1 SV=4	-4.70354	0.00331399	-2.47965	1611.09	5234.51	1366.83	5589.28	1094.17	1084.71	-3623.41	3.24904	0.307783	-0.511755
P51410|RL9_MOUSE	60S ribosomal protein L9 OS=Mus musculus OX=10090 GN=Rpl9 PE=1 SV=2	-2.54025	0.0440659	-1.3559	1301.71	4190.4	1238.09	4835.12	185.093	2266.79	-2888.69	3.21915	0.310641	-0.507741
Q99L20|GSTT3_MOUSE	Glutathione S-transferase theta-3 OS=Mus musculus OX=10090 GN=Gstt3 PE=1 SV=1	-1.15687	0.291298	-0.535662	807.03	2565.3	340.1	1838.83	1172.03	2804.65	-1758.27	3.17869	0.314595	-0.502248
P59017|B2L13_MOUSE	Bcl-2-like protein 13 OS=Mus musculus OX=10090 GN=Bcl2l13 PE=1 SV=2	-0.748768	0.482307	-0.316676	340.151	1080.56	259.531	175.827	414.25	1933.81	-740.412	3.17672	0.314791	-0.501978
Q6ZWY9|H2B1C_MOUSE	Histone H2B type 1-C_E_G OS=Mus musculus OX=10090 GN=H2bc4 PE=1 SV=3	-1.54621	0.173013	-0.761921	384.258	1213.72	178.039	1101.18	557.023	916.977	-829.467	3.15862	0.316594	-0.499498
P35278|RAB5C_MOUSE	Ras-related protein Rab-5C OS=Mus musculus OX=10090 GN=Rab5c PE=1 SV=2	-5.17615	0.00206205	-2.6857	6293.02	19790.7	4844.41	20759.2	4309.67	2937.06	-13497.7	3.14486	0.317979	-0.497601
P99029|PRDX5_MOUSE	Peroxiredoxin-5, mitochondrial OS=Mus musculus OX=10090 GN=Prdx5 PE=1 SV=2"	-5.96547	0.000994173	-3.00254	69864.2	218080	72688.6	206470	18819.2	45989.8	-148216	3.12148	0.32036	-0.494361
Q9QZ85|IIGP1_MOUSE	Interferon-inducible GTPase 1 OS=Mus musculus OX=10090 GN=Iigp1 PE=1 SV=2	-2.67968	0.036552	-1.43709	10773.8	33380.9	8197.6	39216.5	5489.34	15955.1	-22607.1	3.09834	0.322753	-0.491129
P84228|H32_MOUSE	Histone H3.2 OS=Mus musculus OX=10090 GN=H3c2 PE=1 SV=2	-2.63748	0.0386705	-1.41262	3439.41	10629.2	3572.42	8886.64	1781.19	5152.85	-7189.8	3.09042	0.323581	-0.490017
Q3TDN2|FAF2_MOUSE	FAS-associated factor 2 OS=Mus musculus OX=10090 GN=Faf2 PE=1 SV=2	-2.34331	0.0575828	-1.23971	408.51	1233.35	284.408	1269.12	459.401	533.438	-824.836	3.01914	0.331221	-0.479883
Q8VDJ3|VIGLN_MOUSE	Vigilin OS=Mus musculus OX=10090 GN=Hdlbp PE=1 SV=1	-1.18436	0.281055	-0.551209	504.174	1519.71	507.962	913.419	195.898	1703.68	-1015.54	3.01426	0.331756	-0.479181
P70691|UD12_MOUSE	UDP-glucuronosyltransferase 1-2 OS=Mus musculus OX=10090 GN=Ugt1a2 PE=1 SV=1	-1.54388	0.173565	-0.760538	1521.11	4467.67	1661.21	3769.57	838.694	3723.8	-2946.55	2.9371	0.340472	-0.467919
Q78JT3|3HAO_MOUSE	3-hydroxyanthranilate 3,4-dioxygenase OS=Mus musculus OX=10090 GN=Haao PE=1 SV=1"	-1.84925	0.113909	-0.943443	1215.46	3569.46	1109.12	4344.96	688.654	2450.99	-2354	2.93671	0.340518	-0.46786
Q8BX90|FND3A_MOUSE	Fibronectin type-III domain-containing protein 3A OS=Mus musculus OX=10090 GN=Fndc3a PE=1 SV=3	-2.69075	0.0360165	-1.4435	1074.24	3017.28	829.207	2462.46	734.447	1243.54	-1943.04	2.80876	0.356028	-0.448515
P19157|GSTP1_MOUSE	Glutathione S-transferase P 1 OS=Mus musculus OX=10090 GN=Gstp1 PE=1 SV=2	-0.852092	0.42686	-0.369715	1781.33	4986.87	1944.9	1342.06	576.727	7501.81	-3205.54	2.79953	0.357203	-0.447085
Q00623|APOA1_MOUSE	Apolipoprotein A-I OS=Mus musculus OX=10090 GN=Apoa1 PE=1 SV=2	-1.62201	0.155927	-0.807077	18161.6	50141.9	18215.4	44842.2	2967.79	39321.1	-31980.3	2.76088	0.362203	-0.441048
O35459|ECH1_MOUSE	Delta(3,5)-Delta(2,4)-dienoyl-CoA isomerase, mitochondrial OS=Mus musculus OX=10090 GN=Ech1 PE=1 SV=1"	-7.07254	0.000400423	-3.39748	42043.4	114972	41268.9	117320	13314.2	15749.4	-72928.8	2.73461	0.365683	-0.436895
P62806|H4_MOUSE	Histone H4 OS=Mus musculus OX=10090 GN=H4c1 PE=1 SV=2	-2.41985	0.0518735	-1.28505	3519.76	9589.43	3892.14	8109.5	1868.59	4655.56	-6069.67	2.72445	0.367046	-0.435279
B2RXS4|PLXB2_MOUSE	Plexin-B2 OS=Mus musculus OX=10090 GN=Plxnb2 PE=1 SV=1	-1.96446	0.0970932	-1.01281	1433.76	3868.62	1584.02	2817.37	717.272	2372.87	-2434.86	2.69824	0.370612	-0.43108
Q61414|K1C15_MOUSE	Keratin, type I cytoskeletal 15 OS=Mus musculus OX=10090 GN=Krt15 PE=1 SV=2"	-1.32822	0.232393	-0.633777	4313.86	11353.7	2720.65	10978.9	4335.74	9673.18	-7039.84	2.63191	0.379952	-0.420271
P35293|RAB18_MOUSE	Ras-related protein Rab-18 OS=Mus musculus OX=10090 GN=Rab18 PE=1 SV=2	-2.1879	0.0712812	-1.14702	3708.76	9720.63	1876.21	9899.3	4155.77	3595.95	-6011.87	2.62099	0.381535	-0.418465
Q9D898|ARP5L_MOUSE	Actin-related protein 2_3 complex subunit 5-like protein OS=Mus musculus OX=10090 GN=Arpc5l PE=1 SV=1	-0.706911	0.506135	-0.295734	1108.56	2891.93	948.421	501.179	760.547	4987.86	-1783.36	2.60871	0.383331	-0.416427
Q6ZWY3|RS27L_MOUSE	40S ribosomal protein S27-like OS=Mus musculus OX=10090 GN=Rps27l PE=1 SV=3	-1.18305	0.281538	-0.550463	93.1725	242.153	0	287.125	186.345	169.436	-148.981	2.59898	0.384767	-0.414802
Q8BR37|NHLC1_MOUSE	E3 ubiquitin-protein ligase NHLRC1 OS=Mus musculus OX=10090 GN=Nhlrc1 PE=2 SV=1	-0.949621	0.37897	-0.421395	360.692	936.272	353.308	392.687	107.935	1207.42	-575.58	2.59577	0.385243	-0.414266
Q8VC28|AK1CD_MOUSE	Aldo-keto reductase family 1 member C13 OS=Mus musculus OX=10090 GN=Akr1c13 PE=1 SV=2	-1.62746	0.154764	-0.81033	2409.16	6233.38	905.796	5401.6	3124.65	3510.41	-3824.22	2.58737	0.386494	-0.412858
P48036|ANXA5_MOUSE	Annexin A5 OS=Mus musculus OX=10090 GN=Anxa5 PE=1 SV=1	-1.4314	0.202275	-0.694057	180.431	464.898	189.653	535.425	178.318	355.221	-284.467	2.5766	0.388109	-0.411047
Q9D880|TIM50_MOUSE	Mitochondrial import inner membrane translocase subunit TIM50 OS=Mus musculus OX=10090 GN=Timm50 PE=1 SV=1	-1.11448	0.307715	-0.511851	675.643	1718.49	192.995	1777.28	1108.99	1507.49	-1042.85	2.54349	0.39316	-0.405431
Q9DCS2|MTL26_MOUSE	Methyltransferase-like 26 OS=Mus musculus OX=10090 GN=Mettl26 PE=1 SV=1	-2.40169	0.0531723	-1.27431	476.552	1187.72	388.695	954.336	274.871	524.57	-711.168	2.49232	0.401233	-0.396604
Q9EP89|LACTB_MOUSE	Serine beta-lactamase-like protein LACTB, mitochondrial OS=Mus musculus OX=10090 GN=Lactb PE=1 SV=1"	-1.25859	0.254932	-0.593576	601.63	1461.88	516.556	891.519	374.033	1314.84	-860.251	2.42987	0.411545	-0.385582
P05784|K1C18_MOUSE	Keratin, type I cytoskeletal 18 OS=Mus musculus OX=10090 GN=Krt18 PE=1 SV=5"	-3.22393	0.0180477	-1.74358	49164.8	118832	48701.1	126215	9574.4	42145.2	-69667.6	2.41702	0.413732	-0.383281
P50136|ODBA_MOUSE	2-oxoisovalerate dehydrogenase subunit alpha, mitochondrial OS=Mus musculus OX=10090 GN=Bckdha PE=1 SV=1"	-2.15921	0.0741575	-1.12984	191.104	456	185.995	495.036	220.826	106.954	-264.895	2.38613	0.419088	-0.377694
P04104|K2C1_MOUSE	Keratin, type II cytoskeletal 1 OS=Mus musculus OX=10090 GN=Krt1 PE=1 SV=4"	-2.04155	0.0872571	-1.0592	32351.1	76468.9	27371.3	77822	14250.9	40802.9	-44117.8	2.36372	0.423062	-0.373596
Q91V41|RAB14_MOUSE	Ras-related protein Rab-14 OS=Mus musculus OX=10090 GN=Rab14 PE=1 SV=3	-3.94936	0.00754319	-2.12245	8236.32	19329	8185.66	17191.2	2979.2	4762.36	-11092.7	2.3468	0.426113	-0.370476
P16460|ASSY_MOUSE	Argininosuccinate synthase OS=Mus musculus OX=10090 GN=Ass1 PE=1 SV=1	-2.83512	0.0297568	-1.52641	204938	476928	188930	480145	39741.5	187711	-271990	2.32719	0.429704	-0.366831
Q9CW42|MARC1_MOUSE	Mitochondrial amidoxime-reducing component 1 OS=Mus musculus OX=10090 GN=Mtarc1 PE=1 SV=2	-6.09814	0.000885675	-3.05273	30548.2	71075.4	28362.1	72985.7	8715.88	10035	-40527.2	2.32666	0.4298	-0.366733
Q99J39|DCMC_MOUSE	Malonyl-CoA decarboxylase, mitochondrial OS=Mus musculus OX=10090 GN=Mlycd PE=1 SV=1"	-3.88961	0.00808034	-2.09257	3869.94	8878.48	3815	8977.37	512.326	2523.87	-5008.54	2.29422	0.435879	-0.360634
P16331|PH4H_MOUSE	Phenylalanine-4-hydroxylase OS=Mus musculus OX=10090 GN=Pah PE=1 SV=4	-1.83113	0.116805	-0.932538	5116.01	11445.1	4773.56	12265.5	1920.8	6640.56	-6329.09	2.23711	0.447004	-0.349688
Q6IFZ6|K2C1B_MOUSE	Keratin, type II cytoskeletal 1b OS=Mus musculus OX=10090 GN=Krt77 PE=1 SV=1"	-1.08409	0.319952	-0.494915	1389.51	3107.17	1429.48	2851.17	305.449	3154.08	-1717.66	2.23617	0.447194	-0.349504
Q3UHN9|NDST1_MOUSE	Bifunctional heparan sulfate N-deacetylase_N-sulfotransferase 1 OS=Mus musculus OX=10090 GN=Ndst1 PE=1 SV=2	-0.735468	0.489794	-0.309987	51.6344	115.353	0	90.7262	103.269	139.136	-63.7181	2.23402	0.447623	-0.349088
Q922U2|K2C5_MOUSE	Keratin, type II cytoskeletal 5 OS=Mus musculus OX=10090 GN=Krt5 PE=1 SV=1"	-1.83763	0.115758	-0.936448	18751.7	41197.6	15767.5	42785.7	8634.35	22852.4	-22445.9	2.197	0.455165	-0.341831
P02088|HBB1_MOUSE	Hemoglobin subunit beta-1 OS=Mus musculus OX=10090 GN=Hbb-b1 PE=1 SV=2	-3.76643	0.0093278	-2.03022	11836.4	25997.4	10341.9	26066.6	4021.64	6353.81	-14161	2.1964	0.45529	-0.341711
Q9QYR9|ACOT2_MOUSE	Acyl-coenzyme A thioesterase 2, mitochondrial OS=Mus musculus OX=10090 GN=Acot2 PE=1 SV=2"	-2.68869	0.0361158	-1.4423	649.437	1415.85	564.375	1359.27	355.791	445.457	-766.416	2.18012	0.45869	-0.338481
Q9QYJ0|DNJA2_MOUSE	DnaJ homolog subfamily A member 2 OS=Mus musculus OX=10090 GN=Dnaja2 PE=1 SV=1	-1.28006	0.247786	-0.605923	1114.56	2424.6	1172.03	1873.01	609.65	1953.96	-1310.05	2.1754	0.459686	-0.337539
Q9QY76|VAPB_MOUSE	Vesicle-associated membrane protein-associated protein B OS=Mus musculus OX=10090 GN=Vapb PE=1 SV=3	-1.98438	0.0944494	-1.0248	14136.8	30457.5	13562.1	34088.9	3002.42	16172.9	-16320.7	2.15448	0.464149	-0.333343
Q6ZWN5|RS9_MOUSE	40S ribosomal protein S9 OS=Mus musculus OX=10090 GN=Rps9 PE=1 SV=3	-1.08127	0.321109	-0.493347	940.364	2012.87	522.192	2011.91	926.694	1754.04	-1072.51	2.14052	0.467176	-0.33052
P55264|ADK_MOUSE	Adenosine kinase OS=Mus musculus OX=10090 GN=Adk PE=1 SV=2	-3.66197	0.0105547	-1.97655	704.162	1496.34	719.832	1602.86	239.723	360.169	-792.181	2.125	0.470589	-0.327358
P62141|PP1B_MOUSE	Serine_threonine-protein phosphatase PP1-beta catalytic subunit OS=Mus musculus OX=10090 GN=Ppp1cb PE=1 SV=3	-1.37368	0.218654	-0.660243	2356.38	5007.29	1574.4	5911.58	1947.3	3332.31	-2650.91	2.12499	0.470589	-0.327358
Q9WV55|VAPA_MOUSE	Vesicle-associated membrane protein-associated protein A OS=Mus musculus OX=10090 GN=Vapa PE=1 SV=2	-2.35056	0.057015	-1.24401	10754.8	22692	11717.8	24107.9	5448.58	8571.77	-11937.2	2.10994	0.473948	-0.32427
Q9ERI6|RDH14_MOUSE	Retinol dehydrogenase 14 OS=Mus musculus OX=10090 GN=Rdh14 PE=1 SV=1	-1.22855	0.265239	-0.576363	3034.11	6401.6	2891.2	6584.47	2163.06	5037.28	-3367.49	2.10988	0.473961	-0.324258
B2RX12|MRP3_MOUSE	ATP-binding cassette sub-family C member 3 OS=Mus musculus OX=10090 GN=Abcc3 PE=1 SV=2	-2.47629	0.0480461	-1.31834	637.768	1338.38	572.921	1421.67	339.542	452.66	-700.609	2.09853	0.476524	-0.321916
Q8VED5|K2C79_MOUSE	Keratin, type II cytoskeletal 79 OS=Mus musculus OX=10090 GN=Krt79 PE=1 SV=2"	-2.53419	0.0444279	-1.35234	4731.84	9882.85	4600.25	9123.85	1089.85	3916.4	-5151.01	2.08858	0.478793	-0.319852
Q922Q1|MARC2_MOUSE	Mitochondrial amidoxime reducing component 2 OS=Mus musculus OX=10090 GN=Mtarc2 PE=1 SV=1	-3.78321	0.00914584	-2.03878	189955	396415	181985	388570	48280.3	97886.3	-206460	2.08689	0.479182	-0.319499
Q3TTY5|K22E_MOUSE	Keratin, type II cytoskeletal 2 epidermal OS=Mus musculus OX=10090 GN=Krt2 PE=1 SV=1"	-2.516	0.0455325	-1.34168	1995.79	4011.51	2049.11	3659.01	253.49	1582.15	-2015.73	2.00999	0.497514	-0.303194
P55258|RAB8A_MOUSE	Ras-related protein Rab-8A OS=Mus musculus OX=10090 GN=Rab8a PE=1 SV=2	-2.36603	0.0558227	-1.25319	1513.42	3027.29	1362.74	3113.2	1078.16	689.3	-1513.87	2.0003	0.499926	-0.301094
Q8VCF0|MAVS_MOUSE	Mitochondrial antiviral-signaling protein OS=Mus musculus OX=10090 GN=Mavs PE=1 SV=1	-3.06471	0.0220912	-1.65578	2459.77	4903.85	2420.35	4360.36	725.804	1420.28	-2444.09	1.99362	0.501599	-0.299643
Q8VCB3|GYS2_MOUSE	Glycogen [starch] synthase, liver OS=Mus musculus OX=10090 GN=Gys2 PE=1 SV=2"	-1.06199	0.329106	-0.482665	27415.1	54478.6	24974.6	46358.8	20698.2	46575.5	-27063.5	1.98717	0.503228	-0.298235
O08600|NUCG_MOUSE	Endonuclease G, mitochondrial OS=Mus musculus OX=10090 GN=Endog PE=1 SV=1"	-1.08455	0.319766	-0.495168	2237.65	4420.34	2651.62	3835.7	1567.83	3707.18	-2182.7	1.97544	0.506216	-0.295664
Q8CI94|PYGB_MOUSE	Glycogen phosphorylase, brain form OS=Mus musculus OX=10090 GN=Pygb PE=1 SV=3"	-0.853594	0.426089	-0.370499	818.41	1611.38	351.73	1395.86	993.41	1570.07	-792.968	1.96891	0.507894	-0.294227
P62821|RAB1A_MOUSE	Ras-related protein Rab-1A OS=Mus musculus OX=10090 GN=Rab1A PE=1 SV=3	-2.15594	0.074493	-1.12788	16263.9	31910.3	19277.6	29888.4	10442.5	10081.2	-15646.4	1.96203	0.509675	-0.292707
P17751|TPIS_MOUSE	Triosephosphate isomerase OS=Mus musculus OX=10090 GN=Tpi1 PE=1 SV=5	-1.1131	0.308263	-0.511079	783.138	1529.89	776.596	933.962	481.615	1252.34	-746.75	1.95354	0.511893	-0.290821
P40142|TKT_MOUSE	Transketolase OS=Mus musculus OX=10090 GN=Tkt PE=1 SV=1	-1.69157	0.141679	-0.848695	6962.71	13567	6893.24	14827.7	2767.62	7301.58	-6604.31	1.94853	0.513208	-0.289706
Q9QXF8|GNMT_MOUSE	Glycine N-methyltransferase OS=Mus musculus OX=10090 GN=Gnmt PE=1 SV=3	-1.89387	0.107076	-0.970308	6730.16	13002.3	5479.43	14119.7	4671.72	4695.44	-6272.12	1.93194	0.517614	-0.285994
Q9DB30|PHKG2_MOUSE	Phosphorylase b kinase gamma catalytic chain, liver_testis isoform OS=Mus musculus OX=10090 GN=Phkg2 PE=2 SV=2"	-1.31118	0.237738	-0.623901	1093.2	2105.57	1058.99	1946.4	527.229	1451.41	-1012.36	1.92605	0.519197	-0.284668
Q60692|PSB6_MOUSE	Proteasome subunit beta type-6 OS=Mus musculus OX=10090 GN=Psmb6 PE=1 SV=3	-1.72702	0.13491	-0.869956	333.697	641.314	306.76	639.347	176.325	309.543	-307.617	1.92185	0.520333	-0.283719
Q64471|GSTT1_MOUSE	Glutathione S-transferase theta-1 OS=Mus musculus OX=10090 GN=Gstt1 PE=1 SV=4	-1.21976	0.268323	-0.571342	5540.33	10598.2	6640.83	7126.51	2585.74	7879.77	-5057.83	1.91291	0.522763	-0.281695
P47740|AL3A2_MOUSE	Aldehyde dehydrogenase family 3 member A2 OS=Mus musculus OX=10090 GN=Aldh3a2 PE=1 SV=2	-3.36598	0.0151173	-1.82053	37417.5	70834.4	32635	62898.4	11076.2	16479.2	-33416.9	1.89308	0.528239	-0.27717
P97461|RS5_MOUSE	40S ribosomal protein S5 OS=Mus musculus OX=10090 GN=Rps5 PE=1 SV=3	-0.806472	0.450745	-0.346069	1676.88	3162.72	1501.98	1737.83	487.242	3652.42	-1485.83	1.88607	0.530203	-0.275558
P09528|FRIH_MOUSE	Ferritin heavy chain OS=Mus musculus OX=10090 GN=Fth1 PE=1 SV=2	-1.42375	0.20438	-0.689561	1376.64	2566.97	1042.13	2117.68	1133.61	1229.19	-1190.34	1.86467	0.536288	-0.270602
P62270|RS18_MOUSE	40S ribosomal protein S18 OS=Mus musculus OX=10090 GN=Rps18 PE=1 SV=3	-1.03031	0.342596	-0.465218	1445.56	2691.13	1249.62	2480.26	993.946	2204.12	-1245.58	1.86166	0.537156	-0.2699
P62492|RB11A_MOUSE	Ras-related protein Rab-11A OS=Mus musculus OX=10090 GN=Rab11a PE=1 SV=3	-2.03388	0.0881892	-1.05458	5570.49	10313.7	5505.94	11840.5	749.892	4603.49	-4743.17	1.85148	0.540108	-0.267519
P01898|HA10_MOUSE	H-2 class I histocompatibility antigen, Q10 alpha chain OS=Mus musculus OX=10090 GN=H2-Q10 PE=1 SV=3"	-1.05477	0.332142	-0.478676	1488.48	2754.32	1211.81	2729.87	794.309	2264.99	-1265.84	1.85043	0.540416	-0.267272
Q9D0L7|ARM10_MOUSE	Armadillo repeat-containing protein 10 OS=Mus musculus OX=10090 GN=Armc10 PE=1 SV=1	-1.4707	0.191778	-0.717202	381.633	703.702	406.007	539.506	90.2172	428.59	-322.069	1.84392	0.542321	-0.265743
P04186|CFAB_MOUSE	Complement factor B OS=Mus musculus OX=10090 GN=Cfb PE=1 SV=2	-0.608584	0.565113	-0.247865	444.968	814.944	488.229	322.786	107.767	1211.07	-369.976	1.83147	0.546011	-0.262799
Q9WU84|CCS_MOUSE	Copper chaperone for superoxide dismutase OS=Mus musculus OX=10090 GN=Ccs PE=1 SV=1	-1.28611	0.245802	-0.609415	6157.13	11189	6792.5	10995.4	4343.36	6508.79	-5031.86	1.81724	0.550285	-0.259412
Q6P5H2|NEST_MOUSE	Nestin OS=Mus musculus OX=10090 GN=Nes PE=1 SV=1	-1.55644	0.170608	-0.768001	33475.8	60763.3	28455.8	59012.7	19054.7	29434.7	-27287.5	1.81514	0.550922	-0.25891
Q61070|EI24_MOUSE	Etoposide-induced protein 2.4 OS=Mus musculus OX=10090 GN=Ei24 PE=1 SV=3	-1.83503	0.116175	-0.934886	522.019	931.115	461.951	856.042	195.161	400.894	-409.096	1.78368	0.560638	-0.251317
Q7TSH2|KPBB_MOUSE	Phosphorylase b kinase regulatory subunit beta OS=Mus musculus OX=10090 GN=Phkb PE=1 SV=1	-1.41731	0.206166	-0.685782	901.516	1595.48	821.225	1824.45	430.642	879.494	-693.963	1.76977	0.565044	-0.247918
P30115|GSTA3_MOUSE	Glutathione S-transferase A3 OS=Mus musculus OX=10090 GN=Gsta3 PE=1 SV=2	-2.14531	0.0755942	-1.12151	47822.9	83978	47115.8	81372.3	16810.2	29215.2	-36155.2	1.75602	0.569469	-0.24453
Q3UV17|K22O_MOUSE	Keratin, type II cytoskeletal 2 oral OS=Mus musculus OX=10090 GN=Krt76 PE=1 SV=1"	-1.85745	0.112621	-0.94838	11600.2	20065.4	9455.31	19329.1	5721.18	7095.76	-8465.25	1.72975	0.578118	-0.237984
Q78PY7|SND1_MOUSE	Staphylococcal nuclease domain-containing protein 1 OS=Mus musculus OX=10090 GN=Snd1 PE=1 SV=1	-1.372	0.21915	-0.65926	3493.42	5997.51	3913.63	5890.31	1596.78	3282.51	-2504.09	1.7168	0.582478	-0.23472
Q3U1J4|DDB1_MOUSE	DNA damage-binding protein 1 OS=Mus musculus OX=10090 GN=Ddb1 PE=1 SV=2	-0.837176	0.434565	-0.361945	149.212	254.574	132.199	306.279	174.521	181.384	-105.363	1.70613	0.586123	-0.232012
P58281|OPA1_MOUSE	Dynamin-like 120 kDa protein, mitochondrial OS=Mus musculus OX=10090 GN=Opa1 PE=1 SV=1"	-1.15417	0.292322	-0.534138	804.954	1360.68	658.842	1084.83	415.054	868.953	-555.727	1.69038	0.591582	-0.227985
P97822|AN32E_MOUSE	Acidic leucine-rich nuclear phosphoprotein 32 family member E OS=Mus musculus OX=10090 GN=Anp32e PE=1 SV=2	-0.909439	0.398177	-0.399924	1981.66	3337.77	1208.48	3267.34	2090.89	2126.57	-1356.11	1.68433	0.593707	-0.226427
P17742|PPIA_MOUSE	Peptidyl-prolyl cis-trans isomerase A OS=Mus musculus OX=10090 GN=Ppia PE=1 SV=2	-1.83582	0.116048	-0.935362	10769.3	18007.8	10970.8	15493.1	3661.63	6984.18	-7238.48	1.67214	0.598037	-0.223272
Q791T5|MTCH1_MOUSE	Mitochondrial carrier homolog 1 OS=Mus musculus OX=10090 GN=Mtch1 PE=1 SV=1	-1.03261	0.3416	-0.466482	922.002	1496.79	1169.01	1145.41	620.624	924.217	-574.783	1.62341	0.615988	-0.210428
O88736|DHB7_MOUSE	3-keto-steroid reductase_17-beta-hydroxysteroid dehydrogenase 7 OS=Mus musculus OX=10090 GN=Hsd17b7 PE=1 SV=1	-0.490963	0.640892	-0.193215	1456.5	2329.12	1288.36	761.606	938.752	3428.52	-872.616	1.59912	0.625345	-0.20388
Q61598|GDIB_MOUSE	Rab GDP dissociation inhibitor beta OS=Mus musculus OX=10090 GN=Gdi2 PE=1 SV=1	-1.41195	0.207665	-0.682637	1644.58	2575.64	1413.5	2527.01	760.669	1077.35	-931.056	1.56614	0.638514	-0.19483
Q9Z2I0|LETM1_MOUSE	Mitochondrial proton_calcium exchanger protein OS=Mus musculus OX=10090 GN=Letm1 PE=1 SV=1	-2.82283	0.0302413	-1.5194	6431.98	10060.8	6095.67	10141.3	1745.81	1887.4	-3628.78	1.56418	0.639314	-0.194286
P62827|RAN_MOUSE	GTP-binding nuclear protein Ran OS=Mus musculus OX=10090 GN=Ran PE=1 SV=3	-0.895048	0.405234	-0.392294	1491.45	2332.46	737.822	2222.71	1741.04	707.412	-841.018	1.56389	0.639429	-0.194207
P80313|TCPH_MOUSE	T-complex protein 1 subunit eta OS=Mus musculus OX=10090 GN=Cct7 PE=1 SV=1	-0.820779	0.443153	-0.353447	8885.61	13852.5	10669.1	11456.3	4182.85	11357.2	-4966.94	1.55899	0.641442	-0.192843
Q61171|PRDX2_MOUSE	Peroxiredoxin-2 OS=Mus musculus OX=10090 GN=Prdx2 PE=1 SV=3	-1.52944	0.177025	-0.751964	4689.82	7236.97	4719.56	7302.01	2483.74	2219.35	-2547.16	1.54312	0.648036	-0.188401
P63001|RAC1_MOUSE	Ras-related C3 botulinum toxin substrate 1 OS=Mus musculus OX=10090 GN=Rac1 PE=1 SV=1	-0.569567	0.589643	-0.229411	22955.7	35206.9	23514.8	15844.9	9165.26	42031.5	-12251.1	1.53369	0.652024	-0.185737
P01872|IGHM_MOUSE	Immunoglobulin heavy constant mu OS=Mus musculus OX=10090 GN=Ighm PE=1 SV=2	-0.602933	0.568627	-0.245172	3894.98	5907.24	3905.77	5780.56	2812.76	6053.33	-2012.26	1.51663	0.659357	-0.18088
P97742|CPT1A_MOUSE	Carnitine O-palmitoyltransferase 1, liver isoform OS=Mus musculus OX=10090 GN=Cpt1a PE=1 SV=4"	-2.93294	0.0261869	-1.58192	49388.7	74812.3	54339.6	71702.4	13408.9	10989	-25423.6	1.51477	0.660168	-0.180345
P16858|G3P_MOUSE	Glyceraldehyde-3-phosphate dehydrogenase OS=Mus musculus OX=10090 GN=Gapdh PE=1 SV=2	-0.881768	0.41183	-0.385282	11996.1	18155.7	11719.4	15032.8	4725.37	13147.6	-6159.6	1.51347	0.660735	-0.179973
P61021|RAB5B_MOUSE	Ras-related protein Rab-5B OS=Mus musculus OX=10090 GN=Rab5b PE=1 SV=1	-0.489846	0.641637	-0.192711	717.535	1081.79	723.309	389.152	299.922	1456.68	-364.258	1.50765	0.663283	-0.178301
Q8VCN5|CGL_MOUSE	Cystathionine gamma-lyase OS=Mus musculus OX=10090 GN=Cth PE=1 SV=1	-0.634283	0.5493	-0.260191	2500.07	3760.9	2244.11	3374.24	1956.93	3460.59	-1260.82	1.50431	0.664755	-0.177339
P38060|HMGCL_MOUSE	Hydroxymethylglutaryl-CoA lyase, mitochondrial OS=Mus musculus OX=10090 GN=Hmgcl PE=1 SV=2"	-2.05578	0.0855553	-1.06775	63599.4	95104.5	58327.2	98360	21281.3	22057.8	-31505.1	1.49537	0.668732	-0.174748
P49429|HPPD_MOUSE	4-hydroxyphenylpyruvate dioxygenase OS=Mus musculus OX=10090 GN=Hpd PE=1 SV=3	-1.10374	0.311994	-0.505854	10310.7	15305.9	10450.8	14925	3854.64	8189.56	-4995.18	1.48447	0.673643	-0.17157
Q9D1G1|RAB1B_MOUSE	Ras-related protein Rab-1B OS=Mus musculus OX=10090 GN=Rab1b PE=1 SV=1	-0.861616	0.421993	-0.374695	2957.7	4366.82	2550.53	3759.44	869.812	3153.1	-1409.12	1.47642	0.677312	-0.169211
P25444|RS2_MOUSE	40S ribosomal protein S2 OS=Mus musculus OX=10090 GN=Rps2 PE=1 SV=3	-0.778225	0.466008	-0.331607	2423.7	3566.01	3139.22	4400.22	1622.29	2446.71	-1142.31	1.47131	0.679667	-0.167704
P60843|IF4A1_MOUSE	Eukaryotic initiation factor 4A-I OS=Mus musculus OX=10090 GN=Eif4a1 PE=1 SV=1	-0.552617	0.600492	-0.221493	3325.29	4884.17	2981.47	4358.71	2684.58	4962.17	-1558.88	1.4688	0.68083	-0.166962
Q8C0C7|SYFA_MOUSE	Phenylalanine--tRNA ligase alpha subunit OS=Mus musculus OX=10090 GN=Farsa PE=1 SV=1	-0.551738	0.601057	-0.221084	410.984	589.959	440.358	526.568	320.955	563.815	-178.975	1.43548	0.696631	-0.156997
Q60766|IRGM1_MOUSE	Immunity-related GTPase family M protein 1 OS=Mus musculus OX=10090 GN=Irgm1 PE=1 SV=1	-0.859013	0.423319	-0.373332	6590.08	9394.93	6410.07	11602	1709.52	6302.68	-2804.85	1.42562	0.701451	-0.154003
O35490|BHMT1_MOUSE	Betaine--homocysteine S-methyltransferase 1 OS=Mus musculus OX=10090 GN=Bhmt PE=1 SV=1	-1.42407	0.204293	-0.689747	133384	189657	129195	194865	34846.1	70933.5	-56272.3	1.42188	0.703294	-0.152863
Q8VC30|TKFC_MOUSE	Triokinase_FMN cyclase OS=Mus musculus OX=10090 GN=Tkfc PE=1 SV=1	-0.706537	0.506351	-0.295548	3899.45	5525.03	4144.23	4608.27	790.69	4533.12	-1625.59	1.41688	0.705778	-0.151332
Q61543|GSLG1_MOUSE	Golgi apparatus protein 1 OS=Mus musculus OX=10090 GN=Glg1 PE=1 SV=1	-0.82131	0.442873	-0.353721	1422.12	2004.4	1389.82	1669.09	698.106	1234.19	-582.285	1.40945	0.709497	-0.14905
P02535|K1C10_MOUSE	Keratin, type I cytoskeletal 10 OS=Mus musculus OX=10090 GN=Krt10 PE=1 SV=3"	-1.21891	0.268621	-0.570861	20824	28951.8	17838.7	24615	8248.37	10479.4	-8127.82	1.39031	0.719263	-0.143112
P50516|VATA_MOUSE	V-type proton ATPase catalytic subunit A OS=Mus musculus OX=10090 GN=Atp6v1a PE=1 SV=2	-0.73182	0.491862	-0.308157	1131.62	1568	1001.55	1547.86	509.938	1078.07	-436.381	1.38563	0.721696	-0.141646
P00329|ADH1_MOUSE	Alcohol dehydrogenase 1 OS=Mus musculus OX=10090 GN=Adh1 PE=1 SV=2	-1.60089	0.160519	-0.794473	28639	39633.1	27866.2	40905.7	7614.57	11431	-10994.1	1.38389	0.722603	-0.1411
O70325|GPX4_MOUSE	Phospholipid hydroperoxide glutathione peroxidase OS=Mus musculus OX=10090 GN=Gpx4 PE=1 SV=4	-0.725308	0.495566	-0.304898	3169.86	4379.42	2790.31	4480	995.55	3183.27	-1209.56	1.38158	0.723807	-0.140377
P17182|ENOA_MOUSE	Alpha-enolase OS=Mus musculus OX=10090 GN=Eno1 PE=1 SV=3	-1.02982	0.342809	-0.464947	12471.5	17148.5	11667.2	17616.6	4502.32	7888.67	-4676.94	1.37501	0.727268	-0.138306
O70475|UGDH_MOUSE	UDP-glucose 6-dehydrogenase OS=Mus musculus OX=10090 GN=Ugdh PE=1 SV=1	-0.89261	0.406439	-0.391005	1310.87	1793.74	1244.03	1971.65	387.592	1010.12	-482.872	1.36836	0.730802	-0.1362
Q6PA06|ATLA2_MOUSE	Atlastin-2 OS=Mus musculus OX=10090 GN=Atl2 PE=1 SV=1	-0.527789	0.616586	-0.210006	775.931	1050.56	476.032	937.364	717.502	753.812	-274.633	1.35394	0.738585	-0.131599
P62082|RS7_MOUSE	40S ribosomal protein S7 OS=Mus musculus OX=10090 GN=Rps7 PE=2 SV=1	-0.900041	0.402775	-0.394938	1880.15	2538.6	1927.29	2647.47	368.22	1416.06	-658.447	1.35021	0.740626	-0.130401
Q61129|CFAI_MOUSE	Complement factor I OS=Mus musculus OX=10090 GN=Cfi PE=1 SV=3	-1.69891	0.14025	-0.853096	427.626	567.297	426.273	575.72	115.88	116.649	-139.671	1.32662	0.753796	-0.122746
P63017|HSP7C_MOUSE	Heat shock cognate 71 kDa protein OS=Mus musculus OX=10090 GN=Hspa8 PE=1 SV=1	-1.17326	0.285154	-0.544921	18465.9	24343.9	18652.8	22323.9	2601.15	9676.48	-5878.03	1.31832	0.758542	-0.12002
P70441|NHRF1_MOUSE	Na(+)_H(+) exchange regulatory cofactor NHE-RF1 OS=Mus musculus OX=10090 GN=Slc9a3r1 PE=1 SV=3	-1.00655	0.353003	-0.452222	17505.7	23045.7	20542.9	21982.8	8974.46	6374.49	-5540.04	1.31647	0.759606	-0.119411
Q9D1R9|RL34_MOUSE	60S ribosomal protein L34 OS=Mus musculus OX=10090 GN=Rpl34 PE=1 SV=2	-0.497006	0.636868	-0.195951	10415.3	13682.2	7800.01	9961.51	6618.58	11358.6	-3266.88	1.31366	0.761231	-0.118483
P07356|ANXA2_MOUSE	Annexin A2 OS=Mus musculus OX=10090 GN=Anxa2 PE=1 SV=2	-0.98489	0.362712	-0.440438	1302.03	1708.82	1301.11	1761.52	668.684	485.023	-406.792	1.31243	0.761946	-0.118076
P52760|RIDA_MOUSE	2-iminobutanoate_2-iminopropanoate deaminase OS=Mus musculus OX=10090 GN=Rida PE=1 SV=3	-0.887138	0.409153	-0.388114	16981.7	22263	18193.3	20775.7	7073.88	9577.05	-5281.26	1.311	0.762778	-0.117602
Q9CQW0|EMC6_MOUSE	ER membrane protein complex subunit 6 OS=Mus musculus OX=10090 GN=Emc6 PE=1 SV=1	-0.477158	0.650133	-0.186998	1225.86	1603.09	1247.25	1261.97	813.32	1355.95	-377.233	1.30773	0.764685	-0.116518
P35700|PRDX1_MOUSE	Peroxiredoxin-1 OS=Mus musculus OX=10090 GN=Prdx1 PE=1 SV=1	-1.1407	0.297473	-0.526553	166842	216820	162375	234320	27732.2	83122.6	-49977.8	1.29955	0.769497	-0.113793
Q811D0|DLG1_MOUSE	Disks large homolog 1 OS=Mus musculus OX=10090 GN=Dlg1 PE=1 SV=1	-0.377654	0.718686	-0.143461	1203.17	1561.65	1294.04	818.947	580.924	1807.4	-358.482	1.29795	0.770447	-0.113257
Q91X83|METK1_MOUSE	S-adenosylmethionine synthase isoform type-1 OS=Mus musculus OX=10090 GN=Mat1a PE=1 SV=1	-0.838395	0.433932	-0.362579	12170.9	15744.8	11613.3	16708.8	5330.07	6653.95	-3573.88	1.29364	0.773011	-0.111814
P97429|ANXA4_MOUSE	Annexin A4 OS=Mus musculus OX=10090 GN=Anxa4 PE=1 SV=4	-0.278664	0.789858	-0.102451	149.411	192.706	87.5781	141.185	199.902	237.892	-43.2947	1.28977	0.775333	-0.110512
P61982|1433G_MOUSE	14-3-3 protein gamma OS=Mus musculus OX=10090 GN=Ywhag PE=1 SV=2	-0.431958	0.680863	-0.16694	1696.02	2181.13	1769.65	1437.75	1040.52	1990.54	-485.108	1.28603	0.777588	-0.10925
Q68FD5|CLH1_MOUSE	Clathrin heavy chain 1 OS=Mus musculus OX=10090 GN=Cltc PE=1 SV=3	-0.48362	0.645799	-0.189903	8733.44	11172.7	6760.19	9955.47	5199.5	8644.45	-2439.3	1.27931	0.781674	-0.106974
Q9CXE7|TMED5_MOUSE	Transmembrane emp24 domain-containing protein 5 OS=Mus musculus OX=10090 GN=Tmed5 PE=1 SV=1	-0.603651	0.56818	-0.245514	300.396	383.863	341.605	363.6	225.815	159.636	-83.4676	1.27786	0.782559	-0.106483
Q99J08|S14L2_MOUSE	SEC14-like protein 2 OS=Mus musculus OX=10090 GN=Sec14l2 PE=1 SV=1	-0.888442	0.408505	-0.388802	8981.4	11189.3	8899.72	12128.6	1378.75	4775.14	-2207.87	1.24583	0.80268	-0.0954577
P35505|FAAA_MOUSE	Fumarylacetoacetase OS=Mus musculus OX=10090 GN=Fah PE=1 SV=2	-0.523855	0.619158	-0.208199	7739.97	9588.92	6391.76	9475.24	5675.09	4197.99	-1848.95	1.23888	0.807178	-0.0930305
P56382|ATP5E_MOUSE	ATP synthase subunit epsilon, mitochondrial OS=Mus musculus OX=10090 GN=Atp5f1e PE=1 SV=2"	-0.34863	0.739275	-0.131194	10679.7	13205.4	11323.9	13079.3	3012.85	14172.3	-2525.65	1.23649	0.808741	-0.0921908
Q91VM9|IPYR2_MOUSE	Inorganic pyrophosphatase 2, mitochondrial OS=Mus musculus OX=10090 GN=Ppa2 PE=1 SV=1"	-0.310922	0.766378	-0.115557	1158.58	1432.1	1178.19	809.034	930.753	1493.1	-273.525	1.23609	0.809004	-0.0920492
Q9D9V3|ECHD1_MOUSE	Ethylmalonyl-CoA decarboxylase OS=Mus musculus OX=10090 GN=Echdc1 PE=1 SV=2	-0.455592	0.664707	-0.17737	1318.51	1627.57	1355.82	1693.9	615.922	1208.85	-309.055	1.2344	0.810113	-0.0914546
Q8VDQ8|SIR2_MOUSE	NAD-dependent protein deacetylase sirtuin-2 OS=Mus musculus OX=10090 GN=Sirt2 PE=1 SV=2	-0.304186	0.77126	-0.112799	1763.47	2174.56	669.328	2165.04	2434.72	1173.65	-411.083	1.23311	0.810958	-0.0910017
P14206|RSSA_MOUSE	40S ribosomal protein SA OS=Mus musculus OX=10090 GN=Rpsa PE=1 SV=4	-0.505644	0.631141	-0.199874	2363.75	2903.72	2107.45	2761.72	1760.7	1208.91	-539.97	1.22844	0.814042	-0.0893532
P70158|ASM3A_MOUSE	Acid sphingomyelinase-like phosphodiesterase 3a OS=Mus musculus OX=10090 GN=Smpdl3a PE=1 SV=2	-1.00742	0.35262	-0.452693	813.07	998.205	751.258	1058.06	236.033	281.74	-185.135	1.2277	0.814532	-0.0890919
P63325|RS10_MOUSE	40S ribosomal protein S10 OS=Mus musculus OX=10090 GN=Rps10 PE=1 SV=1	-0.173325	0.868095	-0.0614325	335.589	410.35	381.263	0	265.802	820.7	-74.7612	1.22278	0.817811	-0.0873469
Q91YI0|ARLY_MOUSE	Argininosuccinate lyase OS=Mus musculus OX=10090 GN=Asl PE=1 SV=1	-0.713841	0.502136	-0.299179	6355.07	7733.42	5908.33	8368.03	2790.56	2669.48	-1378.35	1.21689	0.821767	-0.0852511
P26150|3BHS3_MOUSE	3 beta-hydroxysteroid dehydrogenase_Delta 5-->4-isomerase type 3 OS=Mus musculus OX=10090 GN=Hsd3b3 PE=1 SV=3	-0.482248	0.646717	-0.189285	6721.69	8170.45	7442.93	6695.5	4372.47	4120.93	-1448.76	1.21554	0.822682	-0.0847678
P62301|RS13_MOUSE	40S ribosomal protein S13 OS=Mus musculus OX=10090 GN=Rps13 PE=1 SV=2	-0.403917	0.700276	-0.154731	2794.24	3381.61	2632.78	3127.65	1772.49	2305.8	-587.364	1.21021	0.826306	-0.082859
P62852|RS25_MOUSE	40S ribosomal protein S25 OS=Mus musculus OX=10090 GN=Rps25 PE=1 SV=1	-1.34727	0.226545	-0.644846	4391.3	5280.55	4332.34	5265.78	1086.47	749.803	-889.253	1.2025	0.831599	-0.0800863
Q8CCJ3|UFL1_MOUSE	E3 UFM1-protein ligase 1 OS=Mus musculus OX=10090 GN=Ufl1 PE=1 SV=2	-0.580108	0.582955	-0.234365	960.619	1148.6	976.557	1009.4	281.434	583.794	-187.981	1.19569	0.836339	-0.0776177
P19096|FAS_MOUSE	Fatty acid synthase OS=Mus musculus OX=10090 GN=Fasn PE=1 SV=2	-0.328199	0.753912	-0.122679	2624.55	3135.78	2073.78	3054.72	2253.01	2151.58	-511.226	1.19479	0.83697	-0.0772903
Q9D8N0|EF1G_MOUSE	Elongation factor 1-gamma OS=Mus musculus OX=10090 GN=Eef1g PE=1 SV=3	-0.299625	0.774572	-0.110938	939.391	1112.5	969.12	1111.32	414.955	1078.42	-173.108	1.18428	0.844397	-0.0734532
P01942|HBA_MOUSE	Hemoglobin subunit alpha OS=Mus musculus OX=10090 GN=Hba PE=1 SV=2	-0.653622	0.537584	-0.269554	31189.8	36838.3	30675.3	38695.3	3818.31	16856.5	-5648.45	1.1811	0.846669	-0.0722863
P28230|CXB1_MOUSE	Gap junction beta-1 protein OS=Mus musculus OX=10090 GN=Gjb1 PE=1 SV=3	-0.285919	0.784555	-0.105377	4118.83	4862.24	4454	3170.51	2330.22	4648.77	-743.404	1.18049	0.847106	-0.072062
P35279|RAB6A_MOUSE	Ras-related protein Rab-6A OS=Mus musculus OX=10090 GN=Rab6a PE=1 SV=4	-0.434393	0.67919	-0.168009	1099.2	1288.59	1318.45	971.79	545.633	680.123	-189.383	1.17229	0.85303	-0.0690355
Q9JMD3|STA10_MOUSE	START domain-containing protein 10 OS=Mus musculus OX=10090 GN=Stard10 PE=1 SV=1	-0.832209	0.437154	-0.359366	1216.14	1421.6	1326.81	1440.26	321.43	374.81	-205.456	1.16894	0.855475	-0.0677925
P51150|RAB7A_MOUSE	Ras-related protein Rab-7a OS=Mus musculus OX=10090 GN=Rab7a PE=1 SV=2	-0.356135	0.733928	-0.134347	10750.1	12539.7	9737.38	12524	3817.88	9296.86	-1789.62	1.16647	0.857284	-0.0668754
Q9R092|H17B6_MOUSE	17-beta-hydroxysteroid dehydrogenase type 6 OS=Mus musculus OX=10090 GN=Hsd17b6 PE=1 SV=1	-0.308602	0.768058	-0.114606	5487.42	6386.14	5044.88	6063.88	5115.49	2785.02	-898.723	1.16378	0.85927	-0.0658704
P06801|MAOX_MOUSE	NADP-dependent malic enzyme OS=Mus musculus OX=10090 GN=Me1 PE=1 SV=2	-0.349969	0.738319	-0.131756	845.111	983.26	786.469	682.803	297.712	731.206	-138.149	1.16347	0.859499	-0.0657544
Q91ZJ5|UGPA_MOUSE	UTP--glucose-1-phosphate uridylyltransferase OS=Mus musculus OX=10090 GN=Ugp2 PE=1 SV=3	-0.197898	0.849659	-0.0707551	636.356	734.14	617.348	541.58	538.922	828.35	-97.7845	1.15366	0.866804	-0.0620791
Q9Z2K1|K1C16_MOUSE	Keratin, type I cytoskeletal 16 OS=Mus musculus OX=10090 GN=Krt16 PE=1 SV=3"	-0.259877	0.803647	-0.0949349	1773.12	2035.31	1529.44	1484.42	983.683	1761.78	-262.189	1.14787	0.87118	-0.0598922
Q9CQX2|CYB5B_MOUSE	Cytochrome b5 type B OS=Mus musculus OX=10090 GN=Cyb5b PE=1 SV=1	-0.657651	0.535163	-0.271514	21740.4	24909.4	23099.8	24144.5	5145.57	8148.84	-3169.04	1.14577	0.872777	-0.0590965
Q9R062|GLYG_MOUSE	Glycogenin-1 OS=Mus musculus OX=10090 GN=Gyg1 PE=1 SV=3	-0.163866	0.875217	-0.0578842	515.43	589.596	287.459	590.781	702.005	571.486	-74.1668	1.14389	0.874208	-0.0583854
P05213|TBA1B_MOUSE	Tubulin alpha-1B chain OS=Mus musculus OX=10090 GN=Tuba1b PE=1 SV=2	-0.292581	0.779697	-0.108074	8717.02	9932.52	6644.09	8626.74	6822.02	4742.95	-1215.49	1.13944	0.877625	-0.0566911
O09173|HGD_MOUSE	Homogentisate 1,2-dioxygenase OS=Mus musculus OX=10090 GN=Hgd PE=1 SV=2"	-0.236991	0.820548	-0.0858959	4414.52	4908.7	4826.03	4858.24	2398.63	3411.62	-494.177	1.11194	0.899326	-0.0460827
Q00724|RET4_MOUSE	Retinol-binding protein 4 OS=Mus musculus OX=10090 GN=Rbp4 PE=1 SV=2	-0.138256	0.894561	-0.0483898	1849.85	2053.3	892.471	1556.23	2332.52	1794.74	-203.45	1.10998	0.900915	-0.045316
O55137|ACOT1_MOUSE	Acyl-coenzyme A thioesterase 1 OS=Mus musculus OX=10090 GN=Acot1 PE=1 SV=1	-0.120833	0.907768	-0.0420251	991.526	1091.63	331.979	1113.59	1377.24	921.065	-100.101	1.10096	0.908301	-0.0417703
P62814|VATB2_MOUSE	V-type proton ATPase subunit B, brain isoform OS=Mus musculus OX=10090 GN=Atp6v1b2 PE=1 SV=1"	-0.20355	0.845433	-0.0729208	626.469	688.578	575.272	426.965	283.196	540.572	-62.1093	1.09914	0.909801	-0.0410538
P40936|INMT_MOUSE	Indolethylamine N-methyltransferase OS=Mus musculus OX=10090 GN=Inmt PE=1 SV=1	-0.109198	0.916606	-0.0378174	182.648	200.306	146.613	165.935	218.959	238.006	-17.6576	1.09668	0.911847	-0.0400781
P14115|RL27A_MOUSE	60S ribosomal protein L27a OS=Mus musculus OX=10090 GN=Rpl27a PE=1 SV=5	-0.259196	0.804148	-0.0946642	2562.19	2792.36	2401.81	2359.54	1108.32	1387.8	-230.173	1.08983	0.917571	-0.0373605
Q9QUI0|RHOA_MOUSE	Transforming protein RhoA OS=Mus musculus OX=10090 GN=Rhoa PE=1 SV=1	-0.192294	0.853855	-0.0686158	2100.11	2262.36	1408.27	2323.17	1465.51	836.644	-162.249	1.07726	0.928283	-0.0323195
P40124|CAP1_MOUSE	Adenylyl cyclase-associated protein 1 OS=Mus musculus OX=10090 GN=Cap1 PE=1 SV=4	-0.0839934	0.935794	-0.0288197	172.378	185.458	117.506	149.246	218.284	222.163	-13.0801	1.07588	0.929471	-0.031764
P11499|HS90B_MOUSE	Heat shock protein HSP 90-beta OS=Mus musculus OX=10090 GN=Hsp90ab1 PE=1 SV=3	-0.228995	0.826478	-0.0827685	13213.2	14170.9	13544.9	13230.2	5113.17	6619.53	-957.7	1.07248	0.932418	-0.0303894
O70570|PIGR_MOUSE	Polymeric immunoglobulin receptor OS=Mus musculus OX=10090 GN=Pigr PE=1 SV=1	-0.05261	0.959751	-0.0178416	186.379	198.587	0	104.056	372.758	276.427	-12.2073	1.0655	0.938529	-0.0275524
P61027|RAB10_MOUSE	Ras-related protein Rab-10 OS=Mus musculus OX=10090 GN=Rab10 PE=1 SV=1	-0.194473	0.852223	-0.0694466	14875.2	15757.1	15786.5	17470.8	5687.65	7065.09	-881.934	1.05929	0.944029	-0.0250144
P55302|AMRP_MOUSE	Alpha-2-macroglobulin receptor-associated protein OS=Mus musculus OX=10090 GN=Lrpap1 PE=1 SV=1	-0.071138	0.9456	-0.0242926	2250.54	2370.69	2495.45	896.564	1287.18	3122.92	-120.145	1.05338	0.949321	-0.022587
Q920E5|FPPS_MOUSE	Farnesyl pyrophosphate synthase OS=Mus musculus OX=10090 GN=Fdps PE=1 SV=1	-0.093889	0.928254	-0.0323331	994.57	1041.26	711.496	780.242	670.748	734.294	-46.6877	1.04694	0.955162	-0.0199229
P70694|DHB5_MOUSE	Estradiol 17 beta-dehydrogenase 5 OS=Mus musculus OX=10090 GN=Akr1c6 PE=1 SV=1	-0.132269	0.899096	-0.0461941	18196.7	19039.3	17614.7	18325.4	10165.8	7680.58	-842.623	1.04631	0.955743	-0.0196589
O70503|DHB12_MOUSE	Very-long-chain 3-oxoacyl-CoA reductase OS=Mus musculus OX=10090 GN=Hsd17b12 PE=1 SV=1	-0.0943448	0.927907	-0.0324955	11834.9	12380.7	11280.7	10878.1	6925.44	9270.14	-545.851	1.04612	0.955911	-0.0195825
P14131|RS16_MOUSE	40S ribosomal protein S16 OS=Mus musculus OX=10090 GN=Rps16 PE=1 SV=4	-0.0870307	0.933479	-0.0298955	1575.73	1637.41	1379.75	1332.88	917.206	1080.93	-61.6886	1.03915	0.962326	-0.0166779
Q91X72|HEMO_MOUSE	Hemopexin OS=Mus musculus OX=10090 GN=Hpx PE=1 SV=2	-0.0367155	0.971903	-0.0123771	1365.06	1397.23	1429.42	762.881	926.331	1487.2	-32.1646	1.02356	0.97698	-0.0101145
Q61233|PLSL_MOUSE	Plastin-2 OS=Mus musculus OX=10090 GN=Lcp1 PE=1 SV=4	-0.0155076	0.98813	-0.00518591	81.1309	82.93	0	0	162.262	165.86	-1.79913	1.02218	0.978305	-0.00952551
P10649|GSTM1_MOUSE	Glutathione S-transferase Mu 1 OS=Mus musculus OX=10090 GN=Gstm1 PE=1 SV=2	-0.0274947	0.978957	-0.00923643	34105.4	34512.5	44172.7	39915.5	21185.4	20685.6	-407.049	1.01194	0.988206	-0.00515263
P23492|PNPH_MOUSE	Purine nucleoside phosphorylase OS=Mus musculus OX=10090 GN=Pnp PE=1 SV=2	-0.0203437	0.984429	-0.00681568	686.332	693.977	549.045	697.953	544.659	517.878	-7.64482	1.01114	0.988984	-0.00481072
P62242|RS8_MOUSE	40S ribosomal protein S8 OS=Mus musculus OX=10090 GN=Rps8 PE=1 SV=2	-0.00258371	0.998022	-0.000859772	830.82	831.608	774.536	884.94	496.929	354.172	-0.788325	1.00095	0.999052	-0.000411886
P16546|SPTN1_MOUSE	Spectrin alpha chain, non-erythrocytic 1 OS=Mus musculus OX=10090 GN=Sptan1 PE=1 SV=4"	0.00224782	0.998279	-0.000747902	2351.9	2348.92	2206.04	2087.27	778.437	2532.17	2.97737	0.998734	1.00127	0.000550141
P51569|AGAL_MOUSE	Alpha-galactosidase A OS=Mus musculus OX=10090 GN=Gla PE=1 SV=1	0.0201327	0.98459	-0.00674445	483.651	480.026	377.221	473.244	325.057	155.072	3.62543	0.992504	1.00755	0.00326771
Q9D6K5|SYJ2B_MOUSE	Synaptojanin-2-binding protein OS=Mus musculus OX=10090 GN=Synj2bp PE=1 SV=1	0.0452036	0.965412	-0.0152873	4580.13	4527.79	4105.16	3731.76	1245.45	1952.45	52.3425	0.988572	1.01156	0.00499177
Q91ZX7|LRP1_MOUSE	Prolow-density lipoprotein receptor-related protein 1 OS=Mus musculus OX=10090 GN=Lrp1 PE=1 SV=1	0.0251417	0.980757	-0.00843846	4899.35	4838.7	5324.22	3667.19	1273.5	4653.45	60.6487	0.987621	1.01253	0.00540965
Q9DBW0|CP4V2_MOUSE	Cytochrome P450 4V2 OS=Mus musculus OX=10090 GN=Cyp4v2 PE=1 SV=1	0.0574236	0.956072	-0.0195092	13872.9	13694.3	12894.3	11322.3	3567.36	5094.28	178.563	0.987129	1.01304	0.00562624
Q8BGT5|ALAT2_MOUSE	Alanine aminotransferase 2 OS=Mus musculus OX=10090 GN=Gpt2 PE=1 SV=1	0.0258634	0.980205	-0.00868307	2753.28	2707.72	1347.08	2617.9	3294.11	1250.91	45.5664	0.98345	1.01683	0.00724765
Q9CXI5|MANF_MOUSE	Mesencephalic astrocyte-derived neurotrophic factor OS=Mus musculus OX=10090 GN=Manf PE=1 SV=1	0.123633	0.905644	-0.0430426	1873.34	1834.88	1795.84	1881.76	523.342	336.516	38.462	0.979469	1.02096	0.00900941
Q8BG51|MIRO1_MOUSE	Mitochondrial Rho GTPase 1 OS=Mus musculus OX=10090 GN=Rhot1 PE=1 SV=1	0.0754385	0.942318	-0.0258024	6052.38	5884.98	6393.6	6525.31	852.103	4355.69	167.407	0.97234	1.02845	0.0121817
Q9CZX8|RS19_MOUSE	40S ribosomal protein S19 OS=Mus musculus OX=10090 GN=Rps19 PE=1 SV=3	0.0551197	0.957833	-0.0187103	985.278	953.519	955.065	845.515	764.474	862.267	31.7587	0.967767	1.03331	0.0142293
P99024|TBB5_MOUSE	Tubulin beta-5 chain OS=Mus musculus OX=10090 GN=Tubb5 PE=1 SV=1	0.0728739	0.944275	-0.0249015	611.284	590.628	518.849	421.668	360.712	437.329	20.6559	0.966209	1.03497	0.0149289
P62892|RL39_MOUSE	60S ribosomal protein L39 OS=Mus musculus OX=10090 GN=Rpl39 PE=1 SV=2	0.379099	0.717667	-0.144077	1217.15	1161.41	1325.06	1202.57	259.47	138.424	55.7436	0.954202	1.048	0.0203599
Q3UNZ8|QORL2_MOUSE	Quinone oxidoreductase-like protein 2 OS=Mus musculus OX=10090 GN=Cryzl2 PE=1 SV=1	0.157952	0.879677	-0.0556769	416.095	394.365	482.561	377.419	197.899	191.162	21.7301	0.947776	1.0551	0.0232943
Q8BXB6|SO2B1_MOUSE	Solute carrier organic anion transporter family member 2B1 OS=Mus musculus OX=10090 GN=Slco2b1 PE=1 SV=1	0.0736508	0.943682	-0.0251742	2488.89	2350.5	2510.83	1115.11	2484.4	2819.6	138.389	0.944397	1.05888	0.0248453
Q8R164|BPHL_MOUSE	Valacyclovir hydrolase OS=Mus musculus OX=10090 GN=Bphl PE=1 SV=1	0.263312	0.80112	-0.0963026	35990.1	33902.9	32628.8	32934.8	13632.7	8091.99	2087.19	0.942007	1.06156	0.0259461
O55111|DSG2_MOUSE	Desmoglein-2 OS=Mus musculus OX=10090 GN=Dsg2 PE=1 SV=3	0.179829	0.863207	-0.0638853	591.715	555.717	611.718	450.661	80.9519	392.082	35.9974	0.939164	1.06478	0.0272584
Q8R2Y8|PTH2_MOUSE	Peptidyl-tRNA hydrolase 2, mitochondrial OS=Mus musculus OX=10090 GN=Ptrh2 PE=1 SV=1"	0.0574457	0.956055	-0.0195169	123.124	115.287	103.269	0	145.821	230.575	7.83605	0.936356	1.06797	0.0285589
P62911|RL32_MOUSE	60S ribosomal protein L32 OS=Mus musculus OX=10090 GN=Rpl32 PE=1 SV=2	0.318605	0.760825	-0.118715	1839.12	1688.22	1606.64	1587.27	807.083	495.898	150.901	0.91795	1.08938	0.0371811
Q63836|SBP2_MOUSE	Selenium-binding protein 2 OS=Mus musculus OX=10090 GN=Selenbp2 PE=1 SV=2	0.143567	0.890543	-0.0503451	581.737	530.107	740.718	361.465	391.86	603.113	51.6292	0.91125	1.09739	0.0403625
P58252|EF2_MOUSE	Elongation factor 2 OS=Mus musculus OX=10090 GN=Eef2 PE=1 SV=2	0.26425	0.800429	-0.096677	29355.6	26747.8	32805.9	26752.1	14951	12886.1	2607.87	0.911163	1.0975	0.040404
P53994|RAB2A_MOUSE	Ras-related protein Rab-2A OS=Mus musculus OX=10090 GN=Rab2a PE=1 SV=1	0.348547	0.739334	-0.13116	2800.99	2521.96	2788.66	2034.24	590.565	1488.21	279.031	0.900381	1.11064	0.0455735
P62962|PROF1_MOUSE	Profilin-1 OS=Mus musculus OX=10090 GN=Pfn1 PE=1 SV=2	0.179442	0.863497	-0.063739	484.557	435.371	286.337	461.877	432.731	336.564	49.1857	0.898493	1.11297	0.0464851
Q9CVB6|ARPC2_MOUSE	Actin-related protein 2_3 complex subunit 2 OS=Mus musculus OX=10090 GN=Arpc2 PE=1 SV=3	0.279668	0.789123	-0.102855	1436.31	1288.46	1510.33	1005.79	758.178	737.006	147.855	0.897059	1.11475	0.0471788
Q8R0F9|S14L4_MOUSE	SEC14-like protein 4 OS=Mus musculus OX=10090 GN=Sec14l4 PE=1 SV=1	0.37083	0.723505	-0.140559	8951.07	7842.22	9303.73	7287.99	3221.71	5038.42	1108.85	0.87612	1.1414	0.0574362
P97328|KHK_MOUSE	Ketohexokinase OS=Mus musculus OX=10090 GN=Khk PE=1 SV=1	0.376648	0.719396	-0.143032	298.536	261.326	296.522	335.062	90.9659	175.396	37.2094	0.87536	1.14239	0.0578131
Q9R0P5|DEST_MOUSE	Destrin OS=Mus musculus OX=10090 GN=Dstn PE=1 SV=3	0.217297	0.835178	-0.0782211	1726.14	1509.03	1181.75	1257.23	1587.85	1213.09	217.103	0.874226	1.14387	0.0583763
O08547|SC22B_MOUSE	Vesicle-trafficking protein SEC22b OS=Mus musculus OX=10090 GN=Sec22b PE=1 SV=3	0.568876	0.590083	-0.229087	2753.86	2405.23	2597.5	2494.97	488.431	1124.19	348.638	0.873401	1.14495	0.0587865
P39054|DYN2_MOUSE	Dynamin-2 OS=Mus musculus OX=10090 GN=Dnm2 PE=1 SV=2	0.559176	0.59628	-0.22455	6430.24	5570.72	6622.55	5000.8	428.883	3044.17	859.519	0.866332	1.15429	0.0623158
P97823|LYPA1_MOUSE	Acyl-protein thioesterase 1 OS=Mus musculus OX=10090 GN=Lypla1 PE=1 SV=1	0.429134	0.682807	-0.165702	5246.15	4526.54	4963.28	4637.69	2406.72	2335.69	719.608	0.862831	1.15898	0.0640741
P61255|RL26_MOUSE	60S ribosomal protein L26 OS=Mus musculus OX=10090 GN=Rpl26 PE=1 SV=1	0.521685	0.620579	-0.207203	6290.01	5406.18	6151.39	5165.15	1967.08	2758.95	883.836	0.859486	1.16349	0.0657613
P28474|ADHX_MOUSE	Alcohol dehydrogenase class-3 OS=Mus musculus OX=10090 GN=Adh5 PE=1 SV=3	0.240221	0.818156	-0.0871638	1725.34	1475.01	1083.95	1385.34	1806.49	1039.29	250.324	0.854913	1.16971	0.0680781
Q9D2C7|BI1_MOUSE	Bax inhibitor 1 OS=Mus musculus OX=10090 GN=Tmbim6 PE=1 SV=1	0.360961	0.730497	-0.136381	3993.03	3383.21	3877.36	2523	1524.18	3015.58	609.822	0.847279	1.18025	0.0719738
Q9EQF5|DPYS_MOUSE	Dihydropyrimidinase OS=Mus musculus OX=10090 GN=Dpys PE=1 SV=2	0.396852	0.705207	-0.151683	929.666	786.373	928.264	514.616	282.775	664.482	143.293	0.845866	1.18222	0.0726984
O35465|FKBP8_MOUSE	Peptidyl-prolyl cis-trans isomerase FKBP8 OS=Mus musculus OX=10090 GN=Fkbp8 PE=1 SV=2	0.450408	0.668234	-0.175072	1548.18	1309.42	1342.02	1257.86	938.486	493.16	238.755	0.845783	1.18234	0.0727409
Q8QZR5|ALAT1_MOUSE	Alanine aminotransferase 1 OS=Mus musculus OX=10090 GN=Gpt PE=1 SV=3	0.469561	0.655248	-0.183594	1520.22	1283.97	1648.22	1140.47	788.478	625.177	236.248	0.844595	1.184	0.0733513
Q9D404|OXSM_MOUSE	3-oxoacyl-[acyl-carrier-protein] synthase, mitochondrial OS=Mus musculus OX=10090 GN=Oxsm PE=1 SV=1"	0.361126	0.73038	-0.136451	651.472	542.962	436.7	532.924	598.404	55.2923	108.51	0.833439	1.19985	0.0791262
O09167|RL21_MOUSE	60S ribosomal protein L21 OS=Mus musculus OX=10090 GN=Rpl21 PE=1 SV=3	0.329022	0.75332	-0.12302	2938.95	2428.89	2807.42	1379.6	2257.5	2125.21	510.06	0.826448	1.21	0.0827844
Q9DCN2|NB5R3_MOUSE	NADH-cytochrome b5 reductase 3 OS=Mus musculus OX=10090 GN=Cyb5r3 PE=1 SV=3	0.941474	0.382805	-0.417022	69271	57210.4	61394.3	54304.4	20038.4	15965.2	12060.6	0.825892	1.21081	0.0830767
Q8BH24|TM9S4_MOUSE	Transmembrane 9 superfamily member 4 OS=Mus musculus OX=10090 GN=Tm9sf4 PE=1 SV=1	0.913629	0.39614	-0.402151	1021.47	839.955	999.488	741.501	283.375	278.533	181.513	0.822302	1.2161	0.0849685
Q9DBA8|HUTI_MOUSE	Probable imidazolonepropionase OS=Mus musculus OX=10090 GN=Amdhd1 PE=1 SV=1	0.255556	0.806829	-0.0932184	394.594	323.386	351.563	199.657	360.981	424.571	71.2088	0.819539	1.2202	0.0864303
P41317|MBL2_MOUSE	Mannose-binding protein C OS=Mus musculus OX=10090 GN=Mbl2 PE=1 SV=2	0.264095	0.800543	-0.0966151	658.605	536.761	416.179	498.826	793.066	471.671	121.844	0.814997	1.227	0.0888442
Q3UQ44|IQGA2_MOUSE	Ras GTPase-activating-like protein IQGAP2 OS=Mus musculus OX=10090 GN=Iqgap2 PE=1 SV=2	0.402391	0.70134	-0.154071	2739.62	2226.72	2801.47	1224.96	535.855	2492.32	512.902	0.812784	1.23034	0.0900251
Q920A5|RISC_MOUSE	Retinoid-inducible serine carboxypeptidase OS=Mus musculus OX=10090 GN=Scpep1 PE=1 SV=2	0.2795	0.789246	-0.102787	517.089	419.554	346.678	405.142	596.178	362.872	97.5355	0.811376	1.23247	0.0907779
P62830|RL23_MOUSE	60S ribosomal protein L23 OS=Mus musculus OX=10090 GN=Rpl23 PE=1 SV=1	1.01	0.351479	-0.454101	5285.71	4281	5479.42	4143.27	1726.14	989.288	1004.71	0.80992	1.23469	0.091558
P08228|SODC_MOUSE	Superoxide dismutase [Cu-Zn] OS=Mus musculus OX=10090 GN=Sod1 PE=1 SV=2	0.720298	0.498429	-0.302396	11809.2	9507.23	11517.6	9976.9	3229.67	5515.74	2301.98	0.805069	1.24213	0.0941667
Q8R0Y6|AL1L1_MOUSE	Cytosolic 10-formyltetrahydrofolate dehydrogenase OS=Mus musculus OX=10090 GN=Aldh1l1 PE=1 SV=1	0.685424	0.518667	-0.285111	24685.8	19731.3	25106.8	18575.7	3640.86	13991	4954.59	0.799294	1.2511	0.0972933
P43006|EAA2_MOUSE	Excitatory amino acid transporter 2 OS=Mus musculus OX=10090 GN=Slc1a2 PE=1 SV=1	0.700255	0.509995	-0.292434	784.379	626.053	678.59	702.338	406.863	197.34	158.326	0.798151	1.2529	0.0979149
P29391|FRIL1_MOUSE	Ferritin light chain 1 OS=Mus musculus OX=10090 GN=Ftl1 PE=1 SV=2	0.761187	0.475388	-0.322952	7965.82	6335.1	8548.2	5951.78	3575.63	2360.76	1630.71	0.795286	1.25741	0.0994765
Q8BH00|AL8A1_MOUSE	2-aminomuconic semialdehyde dehydrogenase OS=Mus musculus OX=10090 GN=Aldh8a1 PE=1 SV=1	0.736496	0.489213	-0.310502	1908.61	1508.39	2129.05	1577.34	703.352	828.547	400.222	0.790307	1.26533	0.102204
P10126|EF1A1_MOUSE	Elongation factor 1-alpha 1 OS=Mus musculus OX=10090 GN=Eef1a1 PE=1 SV=3	1.95148	0.0988562	-1.005	161910	127387	168165	120895	19778.5	29336.8	34522.9	0.786777	1.27101	0.104148
Q99L04|DHRS1_MOUSE	Dehydrogenase_reductase SDR family member 1 OS=Mus musculus OX=10090 GN=Dhrs1 PE=1 SV=1	1.12222	0.304661	-0.516183	37592.4	29499.8	37511.8	29293	12601.1	7015.71	8092.56	0.784729	1.27433	0.10528
P63158|HMGB1_MOUSE	High mobility group protein B1 OS=Mus musculus OX=10090 GN=Hmgb1 PE=1 SV=2	0.523494	0.619394	-0.208033	623.484	486.059	451.654	486.492	489.755	189.196	137.425	0.779586	1.28273	0.108136
Q8R0X7|SGPL1_MOUSE	Sphingosine-1-phosphate lyase 1 OS=Mus musculus OX=10090 GN=Sgpl1 PE=1 SV=1	0.606798	0.566222	-0.247013	1005.53	783.343	949.212	854.692	628.686	375.595	222.19	0.779033	1.28364	0.108444
O88983|STX8_MOUSE	Syntaxin-8 OS=Mus musculus OX=10090 GN=Stx8 PE=1 SV=1	0.415845	0.691987	-0.159902	980.949	761.056	572.075	814.215	1004.79	329.937	219.892	0.775837	1.28893	0.11023
O08573|LEG9_MOUSE	Galectin-9 OS=Mus musculus OX=10090 GN=Lgals9 PE=1 SV=1	1.37396	0.218574	-0.660402	22362.1	17343.3	22109.8	16614.7	2001.12	7026.32	5018.87	0.775564	1.28938	0.110382
P97449|AMPN_MOUSE	Aminopeptidase N OS=Mus musculus OX=10090 GN=Anpep PE=1 SV=4	0.453268	0.666286	-0.176339	4074.3	3147.49	2689.25	2814.37	3737.5	1659.84	926.818	0.772521	1.29446	0.11209
P62264|RS14_MOUSE	40S ribosomal protein S14 OS=Mus musculus OX=10090 GN=Rps14 PE=1 SV=3	0.577102	0.584858	-0.23295	2014.99	1554.39	2183.4	1123.88	876.055	1334.34	460.592	0.771416	1.29632	0.112711
O54749|CP2J5_MOUSE	Cytochrome P450 2J5 OS=Mus musculus OX=10090 GN=Cyp2j5 PE=1 SV=1	0.484031	0.645523	-0.190088	1625.09	1242.42	1514.81	1383.59	1239.17	982.142	382.672	0.764523	1.308	0.116609
P56654|CP237_MOUSE	Cytochrome P450 2C37 OS=Mus musculus OX=10090 GN=Cyp2c37 PE=1 SV=2	0.974766	0.367322	-0.434953	2265.63	1726.66	2218.89	1682.19	1096.22	145.589	538.968	0.762111	1.31214	0.117982
P70194|CLC4F_MOUSE	C-type lectin domain family 4 member F OS=Mus musculus OX=10090 GN=Clec4f PE=1 SV=1	0.417317	0.690967	-0.160543	858.435	651.419	895.097	295.779	675.549	726.601	207.016	0.758845	1.31779	0.119847
Q9Z0M5|LICH_MOUSE	Lysosomal acid lipase_cholesteryl ester hydrolase OS=Mus musculus OX=10090 GN=Lipa PE=1 SV=2	0.483695	0.645748	-0.189937	1672.13	1265.54	1305.94	990.737	1234.99	1140.67	406.588	0.756844	1.32128	0.120994
P59999|ARPC4_MOUSE	Actin-related protein 2_3 complex subunit 4 OS=Mus musculus OX=10090 GN=Arpc4 PE=1 SV=3	1.42369	0.204396	-0.689527	4586.19	3438.08	4279.42	3453.98	1459.38	686.681	1148.11	0.74966	1.33394	0.125136
Q3TDQ1|STT3B_MOUSE	Dolichyl-diphosphooligosaccharide--protein glycosyltransferase subunit STT3B OS=Mus musculus OX=10090 GN=Stt3b PE=1 SV=2	0.888491	0.408481	-0.388828	999.283	745.203	822.855	650.821	457.318	343.47	254.08	0.745738	1.34095	0.127414
Q91WS0|CISD1_MOUSE	CDGSH iron-sulfur domain-containing protein 1 OS=Mus musculus OX=10090 GN=Cisd1 PE=1 SV=1	0.8319	0.437315	-0.359206	15098.1	11239.3	13729.8	11713.9	8340.22	4062.26	3858.73	0.744422	1.34332	0.128181
Q8CFA2|GCST_MOUSE	Aminomethyltransferase, mitochondrial OS=Mus musculus OX=10090 GN=Amt PE=1 SV=1"	0.348583	0.739308	-0.131174	1684.63	1251.19	480.977	1322.76	2418.07	580.845	433.437	0.742711	1.34642	0.12918
P26231|CTNA1_MOUSE	Catenin alpha-1 OS=Mus musculus OX=10090 GN=Ctnna1 PE=1 SV=1	1.22769	0.26554	-0.57587	1652.79	1215.38	1853.27	1251.47	692.009	169.921	437.404	0.735354	1.35989	0.133504
Q8BW75|AOFB_MOUSE	Amine oxidase [flavin-containing] B OS=Mus musculus OX=10090 GN=Maob PE=1 SV=4	1.72533	0.135225	-0.868942	96087.1	70314.7	86527.1	69805.7	23295.3	18704.8	25772.4	0.731781	1.36653	0.135619
Q8K2C9|HACD3_MOUSE	Very-long-chain (3R)-3-hydroxyacyl-CoA dehydratase 3 OS=Mus musculus OX=10090 GN=Hacd3 PE=1 SV=2	1.31671	0.235991	-0.627104	523.8	382.797	534.914	362.95	198.254	81.0317	141.003	0.730808	1.36835	0.136197
P62862|RS30_MOUSE	40S ribosomal protein S30 OS=Mus musculus OX=10090 GN=Fau PE=1 SV=1	1.32498	0.233399	-0.631901	1480.07	1065.42	1487.33	1059.59	522.262	344.931	414.645	0.719847	1.38918	0.14276
P24549|AL1A1_MOUSE	Retinal dehydrogenase 1 OS=Mus musculus OX=10090 GN=Aldh1a1 PE=1 SV=5	0.896766	0.404387	-0.393203	4772.4	3431.63	4325.44	2681.3	1824.07	2369.46	1340.78	0.719057	1.39071	0.143237
P53798|FDFT_MOUSE	Squalene synthase OS=Mus musculus OX=10090 GN=Fdft1 PE=1 SV=2	0.539389	0.609036	-0.215357	377.607	270.533	299.916	195.551	212.244	335.525	107.074	0.716441	1.39579	0.14482
Q60931|VDAC3_MOUSE	Voltage-dependent anion-selective channel protein 3 OS=Mus musculus OX=10090 GN=Vdac3 PE=1 SV=1	0.941114	0.382975	-0.416829	4888.2	3464.68	4636.15	2981.96	2291.93	1974.54	1423.52	0.708784	1.41087	0.149486
P35576|G6PC1_MOUSE	Glucose-6-phosphatase catalytic subunit 1 OS=Mus musculus OX=10090 GN=G6pc1 PE=1 SV=2	0.805329	0.451356	-0.345481	936.769	663.263	878.59	625.639	656.33	174.921	273.506	0.708033	1.41236	0.149947
P80314|TCPB_MOUSE	T-complex protein 1 subunit beta OS=Mus musculus OX=10090 GN=Cct2 PE=1 SV=4	1.0228	0.345857	-0.461103	2933.51	2076.37	3147.96	1581.86	722.891	1512.14	857.135	0.707812	1.4128	0.150082
P27808|MGAT1_MOUSE	Alpha-1,3-mannosyl-glycoprotein 2-beta-N-acetylglucosaminyltransferase OS=Mus musculus OX=10090 GN=Mgat1 PE=1 SV=1"	0.965803	0.371441	-0.43011	1444.15	1022.15	1348.64	1022.13	870.094	81.2122	421.996	0.707789	1.41285	0.150096
P57776|EF1D_MOUSE	Elongation factor 1-delta OS=Mus musculus OX=10090 GN=Eef1d PE=1 SV=3	0.561502	0.594791	-0.225636	607.526	429.691	384.744	516.402	542.377	327.198	177.835	0.707279	1.41387	0.150409
P62984|RL40_MOUSE	Ubiquitin-60S ribosomal protein L40 OS=Mus musculus OX=10090 GN=Uba52 PE=1 SV=2	1.27353	0.24994	-0.602163	18914.6	13345.8	18174.3	12939.2	7069.57	5148.38	5568.86	0.70558	1.41727	0.151454
Q61153|IOD1_MOUSE	Type I iodothyronine deiodinase OS=Mus musculus OX=10090 GN=Dio1 PE=1 SV=3	0.592248	0.575307	-0.2401	1279.52	902.693	1350.56	482.405	813.163	978.824	376.827	0.705494	1.41745	0.151507
P15105|GLNA_MOUSE	Glutamine synthetase OS=Mus musculus OX=10090 GN=Glul PE=1 SV=6	1.46317	0.193749	-0.712759	46704.8	32514.7	47657.8	35885	14442.1	12948	14190.1	0.696174	1.43642	0.157282
P62835|RAP1A_MOUSE	Ras-related protein Rap-1A OS=Mus musculus OX=10090 GN=Rap1a PE=1 SV=1	0.900195	0.402699	-0.395019	23617	16394.4	30069.4	17503.1	13666.9	8409.62	7222.7	0.694174	1.44056	0.158531
Q8R1V4|TMED4_MOUSE	Transmembrane emp24 domain-containing protein 4 OS=Mus musculus OX=10090 GN=Tmed4 PE=1 SV=1	1.84295	0.114907	-0.939652	571.597	396.583	589.774	403.027	178.542	64.7713	175.014	0.693816	1.4413	0.158756
O88833|CP4AA_MOUSE	Cytochrome P450 4A10 OS=Mus musculus OX=10090 GN=Cyp4a10 PE=1 SV=2	0.715701	0.501067	-0.300104	2807.44	1940.81	3449.23	1605.72	1944.82	1443.16	866.635	0.691308	1.44653	0.160328
Q8VBT0|TMX1_MOUSE	Thioredoxin-related transmembrane protein 1 OS=Mus musculus OX=10090 GN=Tmx1 PE=1 SV=1	2.42245	0.0516908	-1.28659	1595.39	1099.65	1731.75	1068.98	292.658	286.129	495.742	0.689266	1.45082	0.161613
Q9CQW2|ARL8B_MOUSE	ADP-ribosylation factor-like protein 8B OS=Mus musculus OX=10090 GN=Arl8b PE=1 SV=1	0.652412	0.538312	-0.268966	4388.91	3023.22	3340.68	2798.23	3700.02	1958.93	1365.69	0.688832	1.45173	0.161887
Q9CPR4|RL17_MOUSE	60S ribosomal protein L17 OS=Mus musculus OX=10090 GN=Rpl17 PE=1 SV=3	0.574306	0.586631	-0.231635	1477.09	1016.7	1243.94	967.515	1468.6	643.28	460.394	0.688311	1.45283	0.162215
Q9CQ22|LTOR1_MOUSE	Ragulator complex protein LAMTOR1 OS=Mus musculus OX=10090 GN=Lamtor1 PE=1 SV=1	0.479581	0.648506	-0.188086	507.208	348.683	329.937	327.29	653.31	101.187	158.525	0.687455	1.45464	0.162756
Q91XD4|FTCD_MOUSE	Formimidoyltransferase-cyclodeaminase OS=Mus musculus OX=10090 GN=Ftcd PE=1 SV=1	1.26967	0.251221	-0.599945	2733.04	1871.98	2898.09	1864.79	971.595	946.409	861.061	0.684944	1.45997	0.164345
Q9DCS3|MECR_MOUSE	Enoyl-[acyl-carrier-protein] reductase, mitochondrial OS=Mus musculus OX=10090 GN=Mecr PE=1 SV=2"	0.897356	0.404096	-0.393515	9629.31	6569.18	10319.8	3926.51	2164.17	6467.88	3060.14	0.682206	1.46583	0.166084
P58710|GGLO_MOUSE	L-gulonolactone oxidase OS=Mus musculus OX=10090 GN=Gulo PE=1 SV=3	1.62974	0.154279	-0.811692	52774.9	35997.6	51753.7	29733.1	15866.6	13120.8	16777.3	0.682098	1.46607	0.166154
Q99LX0|PARK7_MOUSE	Parkinson disease protein 7 homolog OS=Mus musculus OX=10090 GN=Park7 PE=1 SV=1	0.627683	0.553334	-0.257012	2393.04	1631.04	1767.66	1031.69	1898.06	1514.06	761.996	0.681578	1.46718	0.166484
O88428|PAPS2_MOUSE	Bifunctional 3'-phosphoadenosine 5'-phosphosulfate synthase 2 OS=Mus musculus OX=10090 GN=Papss2 PE=1 SV=2	0.505734	0.631081	-0.199915	1449.04	965.641	763.068	803.635	1772.17	716.842	483.396	0.666402	1.5006	0.176264
Q9DBG7|SRPRA_MOUSE	Signal recognition particle receptor subunit alpha OS=Mus musculus OX=10090 GN=Srpra PE=1 SV=1	1.15833	0.290747	-0.536484	1806.89	1201.79	1914.07	1345.02	954.915	423.914	605.1	0.665115	1.5035	0.177103
Q61490|CD166_MOUSE	CD166 antigen OS=Mus musculus OX=10090 GN=Alcam PE=1 SV=3	1.1586	0.290646	-0.536636	2707.42	1794.95	2620.22	1845.47	1116.07	1111.49	912.47	0.662974	1.50835	0.178503
Q9R112|SQOR_MOUSE	Sulfide:quinone oxidoreductase, mitochondrial OS=Mus musculus OX=10090 GN=Sqor PE=1 SV=3"	1.25497	0.256158	-0.591492	12593.5	8302.76	13601.4	7057.46	5788.62	3640.07	4290.72	0.65929	1.51678	0.180923
Q8JZR0|ACSL5_MOUSE	Long-chain-fatty-acid--CoA ligase 5 OS=Mus musculus OX=10090 GN=Acsl5 PE=1 SV=1	2.16459	0.0736092	-1.13307	98052.5	64552.8	91666.3	66636.4	19957.5	23659.1	33499.7	0.65835	1.51895	0.181543
P12710|FABPL_MOUSE	Fatty acid-binding protein, liver OS=Mus musculus OX=10090 GN=Fabp1 PE=1 SV=2"	0.981769	0.364128	-0.438746	64553	42345.4	70548.8	30600.9	25850.5	37127	22207.6	0.655978	1.52444	0.18311
Q64727|VINC_MOUSE	Vinculin OS=Mus musculus OX=10090 GN=Vcl PE=1 SV=4	0.819225	0.443973	-0.352644	435.143	283.693	498.751	351.682	314.116	195.033	151.45	0.651954	1.53385	0.185783
Q9DC29|ABCB6_MOUSE	ATP-binding cassette sub-family B member 6, mitochondrial OS=Mus musculus OX=10090 GN=Abcb6 PE=1 SV=1"	1.14353	0.296384	-0.528146	2981.25	1929.55	2848.02	2295.43	1672.97	764.544	1051.7	0.647229	1.54505	0.188942
P25911|LYN_MOUSE	Tyrosine-protein kinase Lyn OS=Mus musculus OX=10090 GN=Lyn PE=1 SV=4	0.715142	0.501388	-0.299826	4446.05	2877.56	3685.44	1275.37	2724.75	3437.64	1568.49	0.647217	1.54508	0.18895
P60867|RS20_MOUSE	40S ribosomal protein S20 OS=Mus musculus OX=10090 GN=Rps20 PE=1 SV=1	1.2121	0.271034	-0.566976	2560.61	1657.17	2479.1	1390.78	579.804	1373.32	903.438	0.647178	1.54517	0.188976
Q921V5|MGAT2_MOUSE	Alpha-1,6-mannosyl-glycoprotein 2-beta-N-acetylglucosaminyltransferase OS=Mus musculus OX=10090 GN=Mgat2 PE=1 SV=1"	0.905391	0.400153	-0.397774	2794.87	1796.13	2533.37	1821.41	1886.47	1143.93	998.741	0.642652	1.55605	0.192024
Q9JLB0|MPP6_MOUSE	MAGUK p55 subfamily member 6 OS=Mus musculus OX=10090 GN=Mpp6 PE=1 SV=1	1.09538	0.31536	-0.501194	2853.8	1832.86	2471.99	1609.03	1351.58	1283.74	1020.93	0.642254	1.55702	0.192293
Q61941|NNTM_MOUSE	NAD(P) transhydrogenase, mitochondrial OS=Mus musculus OX=10090 GN=Nnt PE=1 SV=2"	1.0106	0.351211	-0.454432	1223.74	778.204	1343.1	743.905	850.18	233.731	445.536	0.635923	1.57252	0.196596
P61358|RL27_MOUSE	60S ribosomal protein L27 OS=Mus musculus OX=10090 GN=Rpl27 PE=1 SV=2	1.36665	0.220731	-0.656136	12485.4	7926.28	11760	7326.01	6183.45	2505.87	4559.07	0.634846	1.57518	0.197331
P35282|RAB21_MOUSE	Ras-related protein Rab-21 OS=Mus musculus OX=10090 GN=Rab21 PE=1 SV=4	0.732192	0.49165	-0.308344	983.451	622.368	905.877	508.918	873.21	458.593	361.084	0.63284	1.58018	0.198706
Q64310|SURF4_MOUSE	Surfeit locus protein 4 OS=Mus musculus OX=10090 GN=Surf4 PE=1 SV=1	1.73652	0.13315	-0.87566	5972.86	3724.06	6216.91	3311.41	1309.87	2234.36	2248.8	0.623497	1.60386	0.205165
Q9R013|CATF_MOUSE	Cathepsin F OS=Mus musculus OX=10090 GN=Ctsf PE=1 SV=1	1.17007	0.286343	-0.543114	1431.37	891.459	1444.51	747.891	793.096	471.916	539.915	0.622799	1.60565	0.205652
P42932|TCPQ_MOUSE	T-complex protein 1 subunit theta OS=Mus musculus OX=10090 GN=Cct8 PE=1 SV=3	3.43819	0.0138315	-1.85913	10559.8	6575.6	11060.6	6339.72	2127.8	918.616	3984.23	0.622699	1.60591	0.205722
Q6ZWV3|RL10_MOUSE	60S ribosomal protein L10 OS=Mus musculus OX=10090 GN=Rpl10 PE=1 SV=3	1.31965	0.235067	-0.628808	10469	6503.8	10272.1	6264.23	4655.55	3800.01	3965.23	0.621242	1.60968	0.206739
Q9CQY5|MAGT1_MOUSE	Magnesium transporter protein 1 OS=Mus musculus OX=10090 GN=Magt1 PE=1 SV=1	1.97567	0.0955959	-1.01956	13784.2	8555.01	13578.3	8537.41	4132.62	3308.16	5229.23	0.620637	1.61125	0.207162
P21958|TAP1_MOUSE	Antigen peptide transporter 1 OS=Mus musculus OX=10090 GN=Tap1 PE=1 SV=3	1.02974	0.342842	-0.464906	769.872	477.786	614.771	531.222	548.553	144.638	292.086	0.620604	1.61133	0.207185
Q61176|ARGI1_MOUSE	Arginase-1 OS=Mus musculus OX=10090 GN=Arg1 PE=1 SV=1	1.49459	0.185645	-0.731317	16797.8	10418.6	15591.4	8021.72	4692.12	7131.21	6379.19	0.620237	1.61229	0.207443
Q3THE2|ML12B_MOUSE	Myosin regulatory light chain 12B OS=Mus musculus OX=10090 GN=Myl12b PE=1 SV=2	0.777453	0.46643	-0.331213	2156.07	1328.83	1793.56	1545.78	2033.13	628.639	827.249	0.616317	1.62254	0.210196
Q9WUQ2|PREB_MOUSE	Prolactin regulatory element-binding protein OS=Mus musculus OX=10090 GN=Preb PE=1 SV=1	1.01166	0.350744	-0.455009	828.499	509.546	699.435	509.28	621.966	103.713	318.953	0.615023	1.62596	0.211109
P68372|TBB4B_MOUSE	Tubulin beta-4B chain OS=Mus musculus OX=10090 GN=Tubb4b PE=1 SV=1	0.856692	0.424503	-0.372119	8293.94	5076.63	6047.71	4570.15	7081.29	2504.09	3217.31	0.612089	1.63375	0.213185
E9Q414|APOB_MOUSE	Apolipoprotein B-100 OS=Mus musculus OX=10090 GN=Apob PE=1 SV=1	1.69006	0.141974	-0.84779	7142.17	4289.5	6417.42	4102.48	2947.87	1645.06	2852.67	0.600587	1.66504	0.221424
P05064|ALDOA_MOUSE	Fructose-bisphosphate aldolase A OS=Mus musculus OX=10090 GN=Aldoa PE=1 SV=2	1.61048	0.158419	-0.800192	5173.26	3078.38	4719.27	2277.17	1369.29	2212.06	2094.88	0.595055	1.68052	0.225443
Q8BXA1|GOLI4_MOUSE	Golgi integral membrane protein 4 OS=Mus musculus OX=10090 GN=Golim4 PE=1 SV=1	1.47329	0.191104	-0.71873	2638.33	1566.46	2247.76	1578.09	1437.52	225.264	1071.86	0.593734	1.68425	0.226408
P45700|MA1A1_MOUSE	Mannosyl-oligosaccharide 1,2-alpha-mannosidase IA OS=Mus musculus OX=10090 GN=Man1a1 PE=1 SV=1"	1.97108	0.0962057	-1.0168	2325.13	1378.07	2285.07	1280.7	876.235	394.51	947.057	0.592687	1.68723	0.227175
P23589|CAH5A_MOUSE	Carbonic anhydrase 5A, mitochondrial OS=Mus musculus OX=10090 GN=Ca5a PE=1 SV=2"	1.56594	0.168403	-0.77365	11378.7	6743.26	12789.5	6080.04	4878.77	3353.82	4635.44	0.592621	1.68742	0.227223
P80315|TCPD_MOUSE	T-complex protein 1 subunit delta OS=Mus musculus OX=10090 GN=Cct4 PE=1 SV=3	1.06173	0.329214	-0.482522	5093.49	3013.37	4984.69	2368.95	3158.27	2319.25	2080.12	0.591612	1.6903	0.227963
Q6PB66|LPPRC_MOUSE	Leucine-rich PPR motif-containing protein, mitochondrial OS=Mus musculus OX=10090 GN=Lrpprc PE=1 SV=2"	1.28478	0.246237	-0.608647	6234.13	3684.34	5652.61	3978.57	3602.08	1667.29	2549.8	0.590994	1.69206	0.228417
P15208|INSR_MOUSE	Insulin receptor OS=Mus musculus OX=10090 GN=Insr PE=1 SV=2	1.13137	0.301083	-0.521313	916.718	540.746	854.584	518.71	617.693	245.341	375.972	0.589872	1.69528	0.229243
P42669|PURA_MOUSE	Transcriptional activator protein Pur-alpha OS=Mus musculus OX=10090 GN=Pura PE=1 SV=1	1.67774	0.144407	-0.840412	529.947	312.341	480.656	265.781	222.838	132.791	217.607	0.589381	1.6967	0.229604
Q8BKZ9|ODPX_MOUSE	Pyruvate dehydrogenase protein X component, mitochondrial OS=Mus musculus OX=10090 GN=Pdhx PE=1 SV=1"	0.904129	0.40077	-0.397105	1723.4	1015.05	1680.58	541.591	1106.27	1109.67	708.346	0.588983	1.69784	0.229897
P16015|CAH3_MOUSE	Carbonic anhydrase 3 OS=Mus musculus OX=10090 GN=Ca3 PE=1 SV=3	1.46203	0.194049	-0.71209	9959.26	5847.16	10088.9	5585.9	5257.56	2000.22	4112.1	0.587108	1.70326	0.231282
Q91YH5|ATLA3_MOUSE	Atlastin-3 OS=Mus musculus OX=10090 GN=Atl3 PE=1 SV=1	0.967318	0.370742	-0.430928	2003.52	1176.28	2266.69	1337.76	1565.31	689.349	827.24	0.587108	1.70327	0.231282
Q8BUV3|GEPH_MOUSE	Gephyrin OS=Mus musculus OX=10090 GN=Gphn PE=1 SV=2	1.04007	0.338391	-0.470582	1624.19	952.826	1065.8	1136.42	1223.72	411.329	671.367	0.586646	1.70461	0.231624
O55142|RL35A_MOUSE	60S ribosomal protein L35a OS=Mus musculus OX=10090 GN=Rpl35a PE=1 SV=2	1.44451	0.198717	-0.701765	5739.57	3350.05	5584.91	2524.67	1529.47	2933.67	2389.52	0.583676	1.71328	0.233828
Q8VCH6|DHC24_MOUSE	Delta(24)-sterol reductase OS=Mus musculus OX=10090 GN=Dhcr24 PE=1 SV=1	1.03472	0.340692	-0.467638	5388.97	3129.15	4027.15	3372.34	4232	1081.49	2259.82	0.580658	1.72219	0.23608
P83882|RL36A_MOUSE	60S ribosomal protein L36a OS=Mus musculus OX=10090 GN=Rpl36a PE=3 SV=2	1.41901	0.205695	-0.686777	3837.5	2225.7	3892.84	2148.36	2059.99	957.673	1611.79	0.579988	1.72417	0.236581
Q8BGY2|IF5A2_MOUSE	Eukaryotic translation initiation factor 5A-2 OS=Mus musculus OX=10090 GN=Eif5a2 PE=1 SV=3	0.839539	0.433338	-0.363173	485.372	281.256	314.575	302.772	426.874	232.863	204.116	0.579464	1.72573	0.236973
Q9D6J5|NDUB8_MOUSE	NADH dehydrogenase [ubiquinone] 1 beta subcomplex subunit 8, mitochondrial OS=Mus musculus OX=10090 GN=Ndufb8 PE=1 SV=1"	0.807405	0.450247	-0.346549	3186.05	1844.56	1998.65	1800.01	3276.57	553.298	1341.49	0.578949	1.72727	0.237359
P99028|QCR6_MOUSE	Cytochrome b-c1 complex subunit 6, mitochondrial OS=Mus musculus OX=10090 GN=Uqcrh PE=1 SV=2"	1.41188	0.207686	-0.682593	2883.27	1666.17	2361.94	1588.33	1618.72	593.494	1217.1	0.577875	1.73048	0.238166
Q02257|PLAK_MOUSE	Junction plakoglobin OS=Mus musculus OX=10090 GN=Jup PE=1 SV=3	3.74764	0.00953619	-2.02063	2267.91	1305.69	2057.65	1312.34	512.103	37.9388	962.219	0.575724	1.73694	0.239786
P28271|ACOC_MOUSE	Cytoplasmic aconitate hydratase OS=Mus musculus OX=10090 GN=Aco1 PE=1 SV=3	2.31443	0.0599041	-1.22254	1335.03	762.916	1383.27	698.514	429.903	244.143	572.118	0.571458	1.74991	0.243016
P57759|ERP29_MOUSE	Endoplasmic reticulum resident protein 29 OS=Mus musculus OX=10090 GN=Erp29 PE=1 SV=2	1.43206	0.202094	-0.694447	9407.11	5355.9	7617.17	5323.52	4884.73	2854.98	4051.21	0.569346	1.7564	0.244624
O08709|PRDX6_MOUSE	Peroxiredoxin-6 OS=Mus musculus OX=10090 GN=Prdx6 PE=1 SV=3	1.33038	0.231723	-0.63503	3726.5	2104.55	3175.65	1399.95	1946.88	1468.02	1621.95	0.564753	1.77068	0.248141
Q9CZB0|C560_MOUSE	Succinate dehydrogenase cytochrome b560 subunit, mitochondrial OS=Mus musculus OX=10090 GN=Sdhc PE=1 SV=1"	1.30329	0.240251	-0.619334	1269.32	715.606	1271.05	570.068	641.917	556.74	553.712	0.563772	1.77377	0.248897
Q9D6Y7|MSRA_MOUSE	Mitochondrial peptide methionine sulfoxide reductase OS=Mus musculus OX=10090 GN=Msra PE=1 SV=1	1.5419	0.174035	-0.759362	2488.5	1402.23	2461.26	1308.31	1390.06	230.264	1086.27	0.563483	1.77468	0.249119
Q8R0F8|FAHD1_MOUSE	Acylpyruvase FAHD1, mitochondrial OS=Mus musculus OX=10090 GN=Fahd1 PE=1 SV=2"	1.11557	0.307283	-0.512461	4408.53	2478.2	3836.63	1225.88	1926.34	2875.01	1930.33	0.562138	1.77892	0.250157
Q9CYH2|PXL2A_MOUSE	Peroxiredoxin-like 2A OS=Mus musculus OX=10090 GN=Prxl2a PE=1 SV=2	2.63742	0.0386735	-1.41259	3389.27	1899.73	3176.77	1887.03	1022.31	480.362	1489.54	0.560514	1.78408	0.251413
P12970|RL7A_MOUSE	60S ribosomal protein L7a OS=Mus musculus OX=10090 GN=Rpl7a PE=1 SV=2	2.07701	0.0830779	-1.08051	21052.4	11797.5	19958.6	12090.3	3983.45	7971.88	9254.86	0.560389	1.78448	0.251511
O88451|RDH7_MOUSE	Retinol dehydrogenase 7 OS=Mus musculus OX=10090 GN=Rdh7 PE=1 SV=1	2.08659	0.0819842	-1.08627	170950	95550.6	160950	84672.9	42050.5	58777.4	75399.4	0.558939	1.78911	0.252636
Q9DCY0|KEG1_MOUSE	Glycine N-acyltransferase-like protein Keg1 OS=Mus musculus OX=10090 GN=Keg1 PE=1 SV=1	1.03809	0.33924	-0.469494	1747.06	970.6	2038.41	923.799	1075.15	1040.14	776.462	0.555561	1.79998	0.255268
P67984|RL22_MOUSE	60S ribosomal protein L22 OS=Mus musculus OX=10090 GN=Rpl22 PE=1 SV=2	2.28173	0.0626511	-1.20307	8487.44	4694.62	9575.16	4892.45	2946.3	1540.04	3792.82	0.553126	1.80791	0.257176
Q99JY4|TRABD_MOUSE	TraB domain-containing protein OS=Mus musculus OX=10090 GN=Trabd PE=1 SV=1	0.57606	0.585518	-0.23246	3237.93	1789.37	1062.91	2029.31	4924.51	1020.76	1448.56	0.552628	1.80953	0.257567
Q91Y97|ALDOB_MOUSE	Fructose-bisphosphate aldolase B OS=Mus musculus OX=10090 GN=Aldob PE=1 SV=3	2.34021	0.0578272	-1.23787	90315.5	49845.6	84165.1	48659.9	24048.5	24857.6	40469.9	0.551905	1.81191	0.258136
Q91XD7|CREL1_MOUSE	Protein disulfide isomerase Creld1 OS=Mus musculus OX=10090 GN=Creld1 PE=1 SV=1	1.04385	0.336776	-0.472659	1139.05	625.682	903.221	572.26	890.985	416.689	513.369	0.549301	1.8205	0.26019
O88441|MTX2_MOUSE	Metaxin-2 OS=Mus musculus OX=10090 GN=Mtx2 PE=1 SV=1	0.779174	0.465489	-0.33209	2802.73	1538.19	1594.47	1674.75	3135.39	839.589	1264.54	0.548818	1.8221	0.260572
P84099|RL19_MOUSE	60S ribosomal protein L19 OS=Mus musculus OX=10090 GN=Rpl19 PE=1 SV=1	1.93081	0.101731	-0.992549	7880.23	4290.41	8532.72	3611	3019.92	2169.59	3589.83	0.544452	1.83671	0.26404
Q61578|ADRO_MOUSE	NADPH:adrenodoxin oxidoreductase, mitochondrial OS=Mus musculus OX=10090 GN=Fdxr PE=1 SV=1"	1.20948	0.271968	-0.565483	1012.61	550.021	1077.37	326.05	337.5	686.458	462.589	0.543172	1.84104	0.265063
P63101|1433Z_MOUSE	14-3-3 protein zeta_delta OS=Mus musculus OX=10090 GN=Ywhaz PE=1 SV=1	1.05346	0.332694	-0.477955	1730.68	931.244	1980.67	482.317	1119.13	1025.22	799.438	0.538079	1.85846	0.269154
Q64105|SPRE_MOUSE	Sepiapterin reductase OS=Mus musculus OX=10090 GN=Spr PE=1 SV=1	2.60233	0.0405353	-1.39217	2446.92	1315.6	2457.84	1454.97	492.722	716.375	1131.32	0.537656	1.85992	0.269495
Q9QXT0|CNPY2_MOUSE	Protein canopy homolog 2 OS=Mus musculus OX=10090 GN=Cnpy2 PE=1 SV=1	2.32321	0.0591883	-1.22776	2315.41	1244.27	2616.56	1292.59	750.118	536.322	1071.15	0.537384	1.86087	0.269715
Q8QZY2|GLCTK_MOUSE	Glycerate kinase OS=Mus musculus OX=10090 GN=Glyctk PE=1 SV=1	1.80949	0.120359	-0.919521	709.684	377.902	810.921	431.226	341.11	134.616	331.781	0.532494	1.87796	0.273685
Q78KK3|S22AI_MOUSE	Solute carrier family 22 member 18 OS=Mus musculus OX=10090 GN=Slc22a18 PE=1 SV=2	1.33684	0.229729	-0.638783	3348.89	1775.91	2881.97	1147.47	1639.74	1687.95	1572.98	0.530298	1.88573	0.27548
O35728|CP4AE_MOUSE	Cytochrome P450 4A14 OS=Mus musculus OX=10090 GN=Cyp4a14 PE=1 SV=1	1.50099	0.184033	-0.735104	5135.12	2718.76	4842.01	2781.43	2567.39	1942.92	2416.36	0.529444	1.88877	0.27618
P19253|RL13A_MOUSE	60S ribosomal protein L13a OS=Mus musculus OX=10090 GN=Rpl13a PE=1 SV=4	0.933217	0.386723	-0.4126	8871.86	4689.32	8617.72	2816.49	7583.18	4779.46	4182.54	0.528561	1.89193	0.276905
Q8VCG4|CO8G_MOUSE	Complement component C8 gamma chain OS=Mus musculus OX=10090 GN=C8g PE=1 SV=1	1.03657	0.339892	-0.468659	1056.54	557.991	841.026	609.072	943.692	186.337	498.547	0.528131	1.89347	0.277258
Q91W43|GCSP_MOUSE	Glycine dehydrogenase (decarboxylating), mitochondrial OS=Mus musculus OX=10090 GN=Gldc PE=1 SV=1"	1.42547	0.203906	-0.690569	6755.04	3566.27	6553.49	2702.68	3806.99	2350.23	3188.77	0.527942	1.89415	0.277414
Q05117|PPA5_MOUSE	Tartrate-resistant acid phosphatase type 5 OS=Mus musculus OX=10090 GN=Acp5 PE=1 SV=2	1.54885	0.172389	-0.763491	14837.7	7814.16	11564.1	9197.11	7990.75	4289.53	7023.5	0.526644	1.89882	0.278483
P45591|COF2_MOUSE	Cofilin-2 OS=Mus musculus OX=10090 GN=Cfl2 PE=1 SV=1	2.32778	0.0588194	-1.23048	1372.71	720.98	1284.69	717.765	543.444	134.999	651.732	0.525223	1.90395	0.279656
Q8VC12|HUTU_MOUSE	Urocanate hydratase OS=Mus musculus OX=10090 GN=Uroc1 PE=1 SV=2	1.90344	0.105665	-0.976068	4356.99	2280.84	4117.76	2410.66	1896.88	1077.36	2076.15	0.52349	1.91026	0.281092
P84091|AP2M1_MOUSE	AP-2 complex subunit mu OS=Mus musculus OX=10090 GN=Ap2m1 PE=1 SV=1	2.14085	0.0760612	-1.11884	6085.52	3182.3	5996.29	3211.13	2459.76	1142.66	2903.22	0.52293	1.9123	0.281557
Q91V92|ACLY_MOUSE	ATP-citrate synthase OS=Mus musculus OX=10090 GN=Acly PE=1 SV=1	1.74009	0.132494	-0.877803	3921.16	2041.71	3627.01	1786	1993.28	832.588	1879.45	0.520691	1.92053	0.28342
Q8CIM7|CP2DQ_MOUSE	Cytochrome P450 2D26 OS=Mus musculus OX=10090 GN=Cyp2d26 PE=1 SV=1	2.49296	0.0469735	-1.32815	64417.5	33508	59460.3	30602.5	16048.5	18903.9	30909.5	0.520169	1.92245	0.283856
Q9CXW4|RL11_MOUSE	60S ribosomal protein L11 OS=Mus musculus OX=10090 GN=Rpl11 PE=1 SV=4	1.58992	0.162955	-0.787932	6912.47	3580.61	6945.69	3434.58	4095.42	891.03	3331.86	0.517993	1.93053	0.285676
P60766|CDC42_MOUSE	Cell division control protein 42 homolog OS=Mus musculus OX=10090 GN=Cdc42 PE=1 SV=2	1.62695	0.154873	-0.810025	3892.74	2008.64	4297.57	1712.91	2185.51	766.79	1884.1	0.515996	1.938	0.287353
P47199|QOR_MOUSE	Quinone oxidoreductase OS=Mus musculus OX=10090 GN=Cryz PE=1 SV=1	2.10809	0.0795821	-1.09918	4924.16	2532.89	4717.13	2175.09	1882.29	1266.41	2391.28	0.514379	1.94409	0.288716
P70404|IDHG1_MOUSE	Isocitrate dehydrogenase [NAD] subunit gamma 1, mitochondrial OS=Mus musculus OX=10090 GN=Idh3g PE=1 SV=1"	1.39877	0.211393	-0.674909	659.666	337.027	743.31	286.775	233.734	397.723	322.639	0.510906	1.95731	0.291659
Q3UMF0|COBL1_MOUSE	Cordon-bleu protein-like 1 OS=Mus musculus OX=10090 GN=Cobll1 PE=1 SV=2	6.13258	0.000859769	-3.06562	3838.19	1949.93	3892.18	1933.49	529.421	314.546	1888.26	0.508033	1.96837	0.294108
P07901|HS90A_MOUSE	Heat shock protein HSP 90-alpha OS=Mus musculus OX=10090 GN=Hsp90aa1 PE=1 SV=4	1.181	0.28229	-0.549305	2533.94	1282.85	2504.88	972.764	1819.85	1084.9	1251.09	0.506266	1.97525	0.295621
Q9DBD0|ICA_MOUSE	Inhibitor of carbonic anhydrase OS=Mus musculus OX=10090 GN=Ica PE=1 SV=1	0.946482	0.380444	-0.419709	1235.41	625.346	774.896	531.515	1249.51	317.085	610.064	0.506185	1.97556	0.295691
P56395|CYB5_MOUSE	Cytochrome b5 OS=Mus musculus OX=10090 GN=Cyb5a PE=1 SV=2	2.87062	0.0284042	-1.54662	76835.7	38612.6	77766.2	35194.7	11391.3	24071.3	38223.1	0.502535	1.98991	0.298834
O88342|WDR1_MOUSE	WD repeat-containing protein 1 OS=Mus musculus OX=10090 GN=Wdr1 PE=1 SV=3	0.876631	0.414403	-0.382577	3178.8	1592.1	2418.89	694.458	3011.65	2008.57	1586.7	0.500849	1.99661	0.300293
Q9QYG0|NDRG2_MOUSE	Protein NDRG2 OS=Mus musculus OX=10090 GN=Ndrg2 PE=1 SV=1	1.06268	0.328816	-0.483046	792.487	396.728	780.109	343.95	627.03	402.006	395.759	0.500612	1.99756	0.300499
P80317|TCPZ_MOUSE	T-complex protein 1 subunit zeta OS=Mus musculus OX=10090 GN=Cct6a PE=1 SV=3	1.54774	0.17265	-0.762833	6200.84	3102.69	5598.48	3066.62	3943.09	692.539	3098.15	0.500366	1.99854	0.300713
P03911|NU4M_MOUSE	NADH-ubiquinone oxidoreductase chain 4 OS=Mus musculus OX=10090 GN=Mtnd4 PE=1 SV=1	0.911848	0.397005	-0.401204	1680.51	838.884	1169.88	358.656	1391.87	1212.59	841.631	0.499183	2.00327	0.30174
Q91WT9|CBS_MOUSE	Cystathionine beta-synthase OS=Mus musculus OX=10090 GN=Cbs PE=1 SV=3	2.7717	0.0323498	-1.49013	1495.5	741.163	1467.95	713.462	535.709	96.3943	754.335	0.495596	2.01777	0.304872
P14148|RL7_MOUSE	60S ribosomal protein L7 OS=Mus musculus OX=10090 GN=Rpl7 PE=1 SV=2	3.17044	0.0193079	-1.71427	32649.8	16144.3	36279.9	17337.8	8171.96	6452.25	16505.5	0.494467	2.02238	0.305862
Q02819|NUCB1_MOUSE	Nucleobindin-1 OS=Mus musculus OX=10090 GN=Nucb1 PE=1 SV=2	1.64968	0.150103	-0.823612	1830.69	903.563	1797.37	858.172	1044.98	414.026	927.124	0.493565	2.02608	0.306656
Q9R1S7|MRP6_MOUSE	ATP-binding cassette sub-family C member 6 OS=Mus musculus OX=10090 GN=Abcc6 PE=1 SV=3	1.17114	0.285943	-0.54372	5267.62	2599.5	3353.7	2043.22	4383.61	1243.05	2668.12	0.493487	2.0264	0.306724
Q9JHJ3|GLMP_MOUSE	Glycosylated lysosomal membrane protein OS=Mus musculus OX=10090 GN=Glmp PE=1 SV=1	1.65824	0.148342	-0.828734	1317.47	647.524	1524.49	659.505	620.43	517.66	669.95	0.491489	2.03463	0.308486
P0DN91|T254C_MOUSE	Transmembrane protein 254c OS=Mus musculus OX=10090 GN=Tmem254c PE=1 SV=1	2.05989	0.0850691	-1.07023	1366.07	670.264	1213.34	661.808	563.063	373.304	695.802	0.490653	2.0381	0.309226
Q01768|NDKB_MOUSE	Nucleoside diphosphate kinase B OS=Mus musculus OX=10090 GN=Nme2 PE=1 SV=1	5.03706	0.00236371	-2.62641	7256.24	3556.04	7159.97	3806.15	604.299	1339.15	3700.19	0.490067	2.04054	0.309745
Q920L1|FADS1_MOUSE	Acyl-CoA (8-3)-desaturase OS=Mus musculus OX=10090 GN=Fads1 PE=1 SV=1	0.917719	0.394159	-0.404328	2067.06	1012.99	1391.73	603.837	2109.62	909.087	1054.08	0.490061	2.04056	0.30975
Q9D379|HYEP_MOUSE	Epoxide hydrolase 1 OS=Mus musculus OX=10090 GN=Ephx1 PE=1 SV=2	1.28731	0.245412	-0.610104	19616.1	9548.81	13680.8	7583.57	14912.1	4718.55	10067.3	0.486785	2.0543	0.312663
Q9WVL0|MAAI_MOUSE	Maleylacetoacetate isomerase OS=Mus musculus OX=10090 GN=Gstz1 PE=1 SV=1	2.41258	0.0523894	-1.28076	12535.5	6095.44	12963.4	4816.74	2710.55	4599.48	6440.09	0.486253	2.05654	0.313138
P49935|CATH_MOUSE	Pro-cathepsin H OS=Mus musculus OX=10090 GN=Ctsh PE=1 SV=2	1.4832	0.188544	-0.724587	2681.23	1300.67	2184.67	1156.69	1668.78	825.042	1380.56	0.485103	2.06142	0.314166
P18581|CTR2_MOUSE	Cationic amino acid transporter 2 OS=Mus musculus OX=10090 GN=Slc7a2 PE=1 SV=3	0.863757	0.420904	-0.375817	528.023	254.471	415.991	188.373	550.638	313.036	273.551	0.481933	2.07498	0.317014
P12790|CP2B9_MOUSE	Cytochrome P450 2B9 OS=Mus musculus OX=10090 GN=Cyp2b9 PE=1 SV=2	1.38501	0.215347	-0.666862	11948	5754.89	9961.82	5120.95	7908.86	4174.74	6193.13	0.48166	2.07615	0.317259
Q9JMH9|MY18A_MOUSE	Unconventional myosin-XVIIIa OS=Mus musculus OX=10090 GN=Myo18a PE=1 SV=2	2.20365	0.0697511	-1.15645	7207.95	3464.62	7303.42	3891.53	3244.59	1007.43	3743.33	0.480667	2.08044	0.318156
P01027|CO3_MOUSE	Complement C3 OS=Mus musculus OX=10090 GN=C3 PE=1 SV=3	3.87276	0.00823944	-2.0841	33056.2	15883.4	29915.4	15881	8552.68	2345.59	17172.8	0.480496	2.08118	0.31831
Q99KF1|TMED9_MOUSE	Transmembrane emp24 domain-containing protein 9 OS=Mus musculus OX=10090 GN=Tmed9 PE=1 SV=2	1.24299	0.260241	-0.584624	745.228	357.662	824.048	367.495	597.976	176.939	387.566	0.479936	2.08361	0.318817
Q8BIJ6|SYIM_MOUSE	Isoleucine--tRNA ligase, mitochondrial OS=Mus musculus OX=10090 GN=Iars2 PE=1 SV=1"	2.32981	0.058656	-1.23169	1247.59	598.75	1251.17	610.676	493.504	258.246	648.84	0.479925	2.08366	0.318826
Q62261|SPTB2_MOUSE	Spectrin beta chain, non-erythrocytic 1 OS=Mus musculus OX=10090 GN=Sptbn1 PE=1 SV=2"	1.56008	0.16976	-0.770165	2352.44	1128.69	2143.36	1112.42	1230.88	972.708	1223.75	0.479795	2.08422	0.318944
P62889|RL30_MOUSE	60S ribosomal protein L30 OS=Mus musculus OX=10090 GN=Rpl30 PE=1 SV=2	2.50506	0.0462106	-1.33526	10912.4	5185.9	10694.2	5111.43	4547.74	469.832	5726.51	0.47523	2.10425	0.323097
Q8K273|EMC5_MOUSE	ER membrane protein complex subunit 5 OS=Mus musculus OX=10090 GN=Mmgt1 PE=1 SV=1	0.701814	0.509089	-0.293206	131.149	62.005	117.26	0	153.127	124.01	69.1441	0.472783	2.11514	0.325339
P07759|SPA3K_MOUSE	Serine protease inhibitor A3K OS=Mus musculus OX=10090 GN=Serpina3k PE=1 SV=2	2.17977	0.0720845	-1.14216	6157.33	2901.54	7048.33	3011.59	2721.75	1231.22	3255.79	0.471233	2.12209	0.326764
Q9EP69|SAC1_MOUSE	Phosphatidylinositol-3-phosphatase SAC1 OS=Mus musculus OX=10090 GN=Sacm1l PE=1 SV=1	0.911772	0.397042	-0.401164	9071.57	4274.55	4956.44	4340.9	10296.3	2169.7	4797.03	0.471202	2.12223	0.326793
P01887|B2MG_MOUSE	Beta-2-microglobulin OS=Mus musculus OX=10090 GN=B2m PE=1 SV=2	1.22302	0.267176	-0.573203	3062.81	1442.17	2668.2	1145.7	2458.09	990.753	1620.65	0.470863	2.12376	0.327105
Q9JHS4|CLPX_MOUSE	ATP-dependent Clp protease ATP-binding subunit clpX-like, mitochondrial OS=Mus musculus OX=10090 GN=Clpx PE=1 SV=2"	1.55871	0.170078	-0.769351	1102.17	517.931	870.824	524.591	721.181	204.604	584.238	0.46992	2.12802	0.327976
Q6P3A8|ODBB_MOUSE	2-oxoisovalerate dehydrogenase subunit beta, mitochondrial OS=Mus musculus OX=10090 GN=Bckdhb PE=1 SV=2"	2.23965	0.0663792	-1.17797	11967.8	5619.36	12413.4	3534.95	3059.31	4772.77	6348.4	0.469542	2.12974	0.328326
Q9CRB9|MIC19_MOUSE	MICOS complex subunit Mic19 OS=Mus musculus OX=10090 GN=Chchd3 PE=1 SV=1	1.55216	0.17161	-0.765457	3273.99	1533.35	3902.14	1591.77	1993.78	1027.25	1740.64	0.468343	2.13519	0.329436
Q8BSY0|ASPH_MOUSE	Aspartyl_asparaginyl beta-hydroxylase OS=Mus musculus OX=10090 GN=Asph PE=1 SV=1	1.69163	0.141668	-0.848729	5270.15	2465.99	4828.97	2543.1	3255.35	627.869	2804.16	0.467916	2.13713	0.329832
Q60598|SRC8_MOUSE	Src substrate cortactin OS=Mus musculus OX=10090 GN=Cttn PE=1 SV=2	1.83821	0.115664	-0.936801	2017.62	941.481	1963.95	718.117	1080.35	451.371	1076.14	0.46663	2.14303	0.331027
P62900|RL31_MOUSE	60S ribosomal protein L31 OS=Mus musculus OX=10090 GN=Rpl31 PE=1 SV=1	1.61409	0.157635	-0.802347	10751	5000.91	12688.4	5138.02	6177.19	3550.44	5750.06	0.465159	2.1498	0.332399
P28666|MUG2_MOUSE	Murinoglobulin-2 OS=Mus musculus OX=10090 GN=Mug2 PE=1 SV=2	2.75985	0.0328605	-1.48333	1275.63	592.572	1332.23	609.137	491.181	61.3115	683.054	0.464534	2.15269	0.332982
O35857|TIM44_MOUSE	Mitochondrial import inner membrane translocase subunit TIM44 OS=Mus musculus OX=10090 GN=Timm44 PE=1 SV=2	0.88289	0.41127	-0.385873	1215.74	563.039	580.058	588.809	1470.19	157.162	652.704	0.463123	2.15925	0.334303
P80316|TCPE_MOUSE	T-complex protein 1 subunit epsilon OS=Mus musculus OX=10090 GN=Cct5 PE=1 SV=1	1.30988	0.238151	-0.623147	1721.7	793.431	1685.29	764.919	1411.93	123.576	928.266	0.460842	2.16994	0.336448
P15392|CP2A4_MOUSE	Cytochrome P450 2A4 OS=Mus musculus OX=10090 GN=Cyp2a4 PE=2 SV=3	1.65045	0.149943	-0.824075	4547.28	2084.36	4397.66	1434.4	2044.94	2173.86	2462.92	0.458376	2.18162	0.338778
Q91X77|CY250_MOUSE	Cytochrome P450 2C50 OS=Mus musculus OX=10090 GN=Cyp2c50 PE=1 SV=2	3.05884	0.022258	-1.65251	37112.4	17009.9	34704	15140.7	9299.52	9288.68	20102.5	0.458336	2.18181	0.338816
Q99JR1|SFXN1_MOUSE	Sideroflexin-1 OS=Mus musculus OX=10090 GN=Sfxn1 PE=1 SV=3	1.22079	0.267959	-0.571932	17656.5	8071.56	15607.7	3674.28	11984.9	10145.9	9584.91	0.457145	2.18749	0.339946
Q99PL5|RRBP1_MOUSE	Ribosome-binding protein 1 OS=Mus musculus OX=10090 GN=Rrbp1 PE=1 SV=2	4.16163	0.00593363	-2.22668	2438.46	1113.36	2476.33	1126.86	584.302	253.239	1325.1	0.456582	2.19019	0.340481
Q64521|GPDM_MOUSE	Glycerol-3-phosphate dehydrogenase, mitochondrial OS=Mus musculus OX=10090 GN=Gpd2 PE=1 SV=2"	1.38895	0.214207	-0.669166	4233.4	1927.87	3376.78	1716.81	3140.02	1077.69	2305.53	0.455394	2.1959	0.341612
Q9R1J0|NSDHL_MOUSE	Sterol-4-alpha-carboxylate 3-dehydrogenase, decarboxylating OS=Mus musculus OX=10090 GN=Nsdhl PE=1 SV=1"	2.38753	0.0542084	-1.26593	3013.48	1372.19	3018.34	1205.66	1095.66	830.56	1641.29	0.455351	2.19611	0.341654
Q9EP75|CP4FE_MOUSE	Leukotriene-B4 omega-hydroxylase 3 OS=Mus musculus OX=10090 GN=Cyp4f14 PE=1 SV=1	2.22673	0.0675696	-1.17025	11767	5312.93	10130.4	4964.25	4490.54	3665.96	6454.07	0.451511	2.21479	0.345332
Q8K0C4|CP51A_MOUSE	Lanosterol 14-alpha demethylase OS=Mus musculus OX=10090 GN=Cyp51a1 PE=1 SV=1	1.92273	0.102876	-0.987685	20746	9339.37	19892.1	7487.23	8197.82	8577.57	11406.6	0.450177	2.22135	0.346616
Q62167|DDX3X_MOUSE	ATP-dependent RNA helicase DDX3X OS=Mus musculus OX=10090 GN=Ddx3x PE=1 SV=3	1.62041	0.156272	-0.806118	1887.91	847.924	2077.44	1052.96	1146.58	577.066	1039.98	0.449134	2.22651	0.347624
P27659|RL3_MOUSE	60S ribosomal protein L3 OS=Mus musculus OX=10090 GN=Rpl3 PE=1 SV=3	3.01384	0.0235836	-1.62739	16378.5	7347.99	15625.5	5357.32	3441.8	4905.73	9030.47	0.448637	2.22897	0.348105
P24456|CP2DA_MOUSE	Cytochrome P450 2D10 OS=Mus musculus OX=10090 GN=Cyp2d10 PE=1 SV=2	3.15257	0.0197503	-1.70443	88336.7	39541.9	84667.9	35677.4	19955.9	23664.6	48794.8	0.447627	2.234	0.349084
Q9JM62|REEP6_MOUSE	Receptor expression-enhancing protein 6 OS=Mus musculus OX=10090 GN=Reep6 PE=1 SV=1	2.89289	0.0275892	-1.55926	12484.5	5571.78	12508.2	5359.26	1697.55	4467.49	6912.76	0.446294	2.24067	0.350379
P01029|CO4B_MOUSE	Complement C4-B OS=Mus musculus OX=10090 GN=C4b PE=1 SV=3	0.958019	0.375048	-0.425913	2206.79	978.737	1077.26	862.157	2512.53	509.891	1228.06	0.443511	2.25474	0.353096
Q8BU14|SEC62_MOUSE	Translocation protein SEC62 OS=Mus musculus OX=10090 GN=Sec62 PE=1 SV=1	2.11471	0.0788582	-1.10315	2337.51	1033.67	2425.26	685.219	768.831	964.1	1303.85	0.442209	2.26138	0.354373
P48758|CBR1_MOUSE	Carbonyl reductase [NADPH] 1 OS=Mus musculus OX=10090 GN=Cbr1 PE=1 SV=3	1.7987	0.122173	-0.913026	4304.71	1902.49	5036.83	1500.84	2297.7	1362.04	2402.22	0.441956	2.26267	0.354621
P06909|CFAH_MOUSE	Complement factor H OS=Mus musculus OX=10090 GN=Cfh PE=1 SV=2	2.11455	0.0788749	-1.10306	898.379	396.869	898.415	401.764	456.815	127.751	501.51	0.441761	2.26367	0.354813
Q91VS7|MGST1_MOUSE	Microsomal glutathione S-transferase 1 OS=Mus musculus OX=10090 GN=Mgst1 PE=1 SV=3	2.22082	0.0681209	-1.16672	66227.9	29201.8	62258.8	29270.2	33159.1	3512.32	37026.2	0.440928	2.26794	0.355632
Q7TNG8|LDHD_MOUSE	Probable D-lactate dehydrogenase, mitochondrial OS=Mus musculus OX=10090 GN=Ldhd PE=1 SV=1"	3.19511	0.0187151	-1.72781	6240.65	2723.3	6457.05	2139.99	765.632	2064.29	3517.35	0.436381	2.29158	0.360134
Q8BP67|RL24_MOUSE	60S ribosomal protein L24 OS=Mus musculus OX=10090 GN=Rpl24 PE=1 SV=2	1.67499	0.144956	-0.838764	5381.14	2348	4871.47	2261.55	3568.99	615.526	3033.14	0.436339	2.2918	0.360176
P47915|RL29_MOUSE	60S ribosomal protein L29 OS=Mus musculus OX=10090 GN=Rpl29 PE=1 SV=2	0.834157	0.436137	-0.360377	1236.24	537.245	914.137	334.583	1521.32	703.114	698.998	0.434579	2.30108	0.361931
O35488|S27A2_MOUSE	Very long-chain acyl-CoA synthetase OS=Mus musculus OX=10090 GN=Slc27a2 PE=1 SV=2	3.44838	0.0136601	-1.86455	150422	65209.2	131635	61254.5	43268.6	23882.9	85213.3	0.433507	2.30677	0.363004
Q61009|SCRB1_MOUSE	Scavenger receptor class B member 1 OS=Mus musculus OX=10090 GN=Scarb1 PE=1 SV=1	2.88407	0.0279089	-1.55426	8941.28	3858.17	8509.81	4119.91	3053.69	1760.77	5083.11	0.431501	2.31749	0.365018
P35492|HUTH_MOUSE	Histidine ammonia-lyase OS=Mus musculus OX=10090 GN=Hal PE=1 SV=1	1.43923	0.200144	-0.698658	3667.02	1579.16	2877.37	1590.59	2859.98	488.243	2087.85	0.43064	2.32213	0.365886
Q8VCR2|DHB13_MOUSE	17-beta-hydroxysteroid dehydrogenase 13 OS=Mus musculus OX=10090 GN=Hsd17b13 PE=1 SV=2	3.95548	0.00749047	-2.12549	35051	15065.7	36618.7	14958.2	6144.87	8022.11	19985.3	0.429823	2.32654	0.36671
P35980|RL18_MOUSE	60S ribosomal protein L18 OS=Mus musculus OX=10090 GN=Rpl18 PE=1 SV=3	2.28113	0.0627025	-1.20272	30272.6	12974.4	35417.5	12546.7	14176.5	5389.29	17298.2	0.428585	2.33326	0.367963
Q9DCG6|PBLD1_MOUSE	Phenazine biosynthesis-like domain-containing protein 1 OS=Mus musculus OX=10090 GN=Pbld1 PE=1 SV=2	1.39054	0.21375	-0.670093	1880.95	803.794	1307.69	634.117	1454.92	532.385	1077.16	0.427334	2.34009	0.369232
Q922B1|MACD1_MOUSE	ADP-ribose glycohydrolase MACROD1 OS=Mus musculus OX=10090 GN=Macrod1 PE=1 SV=2	1.38144	0.216386	-0.664771	1271.38	541.75	1217.56	557.782	949.681	462.554	729.631	0.426111	2.3468	0.370477
Q61586|GPAT1_MOUSE	Glycerol-3-phosphate acyltransferase 1, mitochondrial OS=Mus musculus OX=10090 GN=Gpam PE=1 SV=2"	1.54302	0.173769	-0.760028	953.088	403.713	1073.48	433.008	700.96	125.329	549.375	0.423584	2.36081	0.37306
O08914|FAAH1_MOUSE	Fatty-acid amide hydrolase 1 OS=Mus musculus OX=10090 GN=Faah PE=1 SV=1	1.07602	0.323271	-0.490433	2885.94	1215.53	1419.38	1301.43	3018.1	728.606	1670.41	0.421191	2.37422	0.375521
O54909|RDH16_MOUSE	Retinol dehydrogenase 16 OS=Mus musculus OX=10090 GN=Rdh16 PE=1 SV=1	1.17198	0.285628	-0.544198	3775.99	1586.27	3381.71	813.704	3179.96	1962.48	2189.72	0.420094	2.38042	0.376653
O08966|S22A1_MOUSE	Solute carrier family 22 member 1 OS=Mus musculus OX=10090 GN=Slc22a1 PE=1 SV=2	1.26059	0.254258	-0.594725	1262.7	529.523	1170.48	524.61	1144.07	210.234	733.18	0.419357	2.3846	0.377416
Q9JIL4|NHRF3_MOUSE	Na(+)_H(+) exchange regulatory cofactor NHE-RF3 OS=Mus musculus OX=10090 GN=Pdzk1 PE=1 SV=1	2.11308	0.0790358	-1.10218	7145.58	2982.92	6234.33	2949.65	3912.51	463.794	4162.67	0.417449	2.3955	0.379396
Q64735|CR1L_MOUSE	Complement component receptor 1-like protein OS=Mus musculus OX=10090 GN=Cr1l PE=1 SV=1	0.894288	0.40561	-0.391892	970.626	404.985	861.05	217.838	1134.98	558.641	565.642	0.41724	2.3967	0.379614
Q9DC16|ERGI1_MOUSE	Endoplasmic reticulum-Golgi intermediate compartment protein 1 OS=Mus musculus OX=10090 GN=Ergic1 PE=1 SV=1	3.68949	0.0102149	-1.99077	3679.96	1530.36	4005.03	1714.36	1010.43	580.381	2149.6	0.415864	2.40463	0.381049
P26039|TLN1_MOUSE	Talin-1 OS=Mus musculus OX=10090 GN=Tln1 PE=1 SV=2	2.78933	0.0316053	-1.50024	1167.81	484.378	1249.33	492.217	277.961	403.567	683.428	0.414776	2.41094	0.382186
Q64176|EST1E_MOUSE	Carboxylesterase 1E OS=Mus musculus OX=10090 GN=Ces1e PE=1 SV=1	2.15348	0.074746	-1.12641	2800.66	1161.01	2882.36	1136.77	1296.54	798.657	1639.65	0.41455	2.41225	0.382423
P47758|SRPRB_MOUSE	Signal recognition particle receptor subunit beta OS=Mus musculus OX=10090 GN=Srprb PE=1 SV=1	3.61795	0.0111245	-1.95372	6963.45	2866.69	6852.92	2692.4	1933.03	1179.91	4096.76	0.411677	2.42909	0.385443
Q8CCH2|NHLC3_MOUSE	NHL repeat-containing protein 3 OS=Mus musculus OX=10090 GN=Nhlrc3 PE=1 SV=1	1.0624	0.328932	-0.482894	1842.97	758.485	1156.16	573.575	1951.52	599.697	1084.49	0.411555	2.42981	0.385572
P48962|ADT1_MOUSE	ADP_ATP translocase 1 OS=Mus musculus OX=10090 GN=Slc25a4 PE=1 SV=4	0.953283	0.377256	-0.423364	2855.81	1172.46	1705.56	995.74	3406.47	932.089	1683.35	0.410552	2.43574	0.386631
Q9DD20|MET7B_MOUSE	Methyltransferase-like protein 7B OS=Mus musculus OX=10090 GN=Mettl7b PE=1 SV=2	3.58081	0.0116317	-1.93436	92198.2	37762.5	94173.9	33991.7	23669.4	19083.3	54435.7	0.409579	2.44153	0.387662
P06802|ENPP1_MOUSE	Ectonucleotide pyrophosphatase_phosphodiesterase family member 1 OS=Mus musculus OX=10090 GN=Enpp1 PE=1 SV=4	1.02617	0.344392	-0.462947	723.878	292.761	519.688	290.748	802.269	249.763	431.117	0.404434	2.47259	0.393152
P17427|AP2A2_MOUSE	AP-2 complex subunit alpha-2 OS=Mus musculus OX=10090 GN=Ap2a2 PE=1 SV=2	3.28907	0.0166331	-1.77903	7373.45	2979.61	6825.7	3026.17	2180.34	1544.19	4393.84	0.4041	2.47463	0.393511
Q05421|CP2E1_MOUSE	Cytochrome P450 2E1 OS=Mus musculus OX=10090 GN=Cyp2e1 PE=1 SV=1	3.64756	0.0107375	-1.9691	113856	45890.4	103682	42164.3	22252.2	29893.6	67965.8	0.403055	2.48105	0.394635
Q8C7X2|EMC1_MOUSE	ER membrane protein complex subunit 1 OS=Mus musculus OX=10090 GN=Emc1 PE=1 SV=1	3.30002	0.0164076	-1.78496	4618.14	1859.35	4450.94	1801.85	1550.56	625.56	2758.79	0.402618	2.48374	0.395107
Q64442|DHSO_MOUSE	Sorbitol dehydrogenase OS=Mus musculus OX=10090 GN=Sord PE=1 SV=3	2.80842	0.0308204	-1.51116	11953.6	4809.53	11796.8	4443.3	3673.72	3519.64	7144.11	0.402349	2.48541	0.395397
Q9DBL7|COASY_MOUSE	Bifunctional coenzyme A synthase OS=Mus musculus OX=10090 GN=Coasy PE=1 SV=2	2.02105	0.0897692	-1.04687	3912.24	1569.06	4207.85	1363.71	2235.48	615.865	2343.18	0.401065	2.49336	0.396786
P30999|CTND1_MOUSE	Catenin delta-1 OS=Mus musculus OX=10090 GN=Ctnnd1 PE=1 SV=2	1.96305	0.097283	-1.01196	2403.59	962.986	2287.13	937.162	1456.58	180.47	1440.6	0.400645	2.49598	0.39724
Q9DCS9|NDUBA_MOUSE	NADH dehydrogenase [ubiquinone] 1 beta subcomplex subunit 10 OS=Mus musculus OX=10090 GN=Ndufb10 PE=1 SV=3	1.51387	0.180829	-0.742731	6118.56	2443.86	5559.35	2173.66	4533.7	1736.06	3674.7	0.399417	2.50365	0.398573
P47964|RL36_MOUSE	60S ribosomal protein L36 OS=Mus musculus OX=10090 GN=Rpl36 PE=1 SV=2	2.72334	0.0344896	-1.46231	4433.66	1768.35	5023.43	1784.17	1453.83	1310.63	2665.31	0.398846	2.50723	0.399195
Q8QZS1|HIBCH_MOUSE	3-hydroxyisobutyryl-CoA hydrolase, mitochondrial OS=Mus musculus OX=10090 GN=Hibch PE=1 SV=1"	2.1499	0.075117	-1.12426	27802.1	11049.4	31679	11747.5	14854.6	4713.79	16752.6	0.397432	2.51615	0.400737
Q9CZM2|RL15_MOUSE	60S ribosomal protein L15 OS=Mus musculus OX=10090 GN=Rpl15 PE=1 SV=4	2.77361	0.0322683	-1.49122	19252.2	7646.24	19577.5	6576.69	4045.41	7326.11	11605.9	0.397163	2.51786	0.401031
P11983|TCPA_MOUSE	T-complex protein 1 subunit alpha OS=Mus musculus OX=10090 GN=Tcp1 PE=1 SV=3	3.74072	0.00961428	-2.01708	3780.68	1495.38	3802.59	1570.78	1162.31	376.769	2285.3	0.395532	2.52824	0.402819
Q91Z53|GRHPR_MOUSE	Glyoxylate reductase_hydroxypyruvate reductase OS=Mus musculus OX=10090 GN=Grhpr PE=1 SV=1	2.36231	0.0561068	-1.25098	7923.11	3124.42	7470.08	3052.3	3655.5	1772.83	4798.69	0.394343	2.53586	0.404126
Q9EQ06|DHB11_MOUSE	Estradiol 17-beta-dehydrogenase 11 OS=Mus musculus OX=10090 GN=Hsd17b11 PE=1 SV=1	2.50436	0.0462548	-1.33484	5640.13	2218.12	4789.39	2112.31	2050.34	1806.82	3422.02	0.393274	2.54276	0.405305
Q9R233|TPSN_MOUSE	Tapasin OS=Mus musculus OX=10090 GN=Tapbp PE=1 SV=2	1.90543	0.105374	-0.977267	11651	4570.15	11678.6	3464.92	6268.01	3993.95	7080.89	0.392252	2.54938	0.406435
P11609|CD1D1_MOUSE	Antigen-presenting glycoprotein CD1d1 OS=Mus musculus OX=10090 GN=Cd1d1 PE=1 SV=3	5.01912	0.00240615	-2.61868	3822.23	1493.57	3787.85	1364.17	351.19	858.889	2328.66	0.390759	2.55912	0.408091
Q91WN4|KMO_MOUSE	Kynurenine 3-monooxygenase OS=Mus musculus OX=10090 GN=Kmo PE=1 SV=1	2.92648	0.0264076	-1.57827	44638.8	17418	39094.5	14764.9	16867.2	7846.73	27220.8	0.390199	2.5628	0.408714
Q9DCJ5|NDUA8_MOUSE	NADH dehydrogenase [ubiquinone] 1 alpha subcomplex subunit 8 OS=Mus musculus OX=10090 GN=Ndufa8 PE=1 SV=3	2.03531	0.0880138	-1.05545	9281.3	3611.63	7302.57	3413.72	5120.73	2194.88	5669.67	0.38913	2.56984	0.409905
Q8BHI7|ELOV5_MOUSE	Elongation of very long chain fatty acids protein 5 OS=Mus musculus OX=10090 GN=Elovl5 PE=1 SV=1	2.09349	0.081205	-1.09042	497.951	193.003	528.739	191.245	187.61	222.879	304.948	0.387594	2.58002	0.411623
P62908|RS3_MOUSE	40S ribosomal protein S3 OS=Mus musculus OX=10090 GN=Rps3 PE=1 SV=1	1.48083	0.189153	-0.723188	1443.97	558.295	1137.65	584.681	1183.95	170.656	885.674	0.386639	2.58639	0.412694
P03921|NU5M_MOUSE	NADH-ubiquinone oxidoreductase chain 5 OS=Mus musculus OX=10090 GN=Mtnd5 PE=1 SV=3	1.19135	0.2785	-0.555174	1172.61	453.25	803.606	179.055	991.967	688.769	719.364	0.38653	2.58712	0.412817
Q9WV32|ARC1B_MOUSE	Actin-related protein 2_3 complex subunit 1B OS=Mus musculus OX=10090 GN=Arpc1b PE=1 SV=4	2.10513	0.0799094	-1.0974	795.721	307.558	725.406	279.921	294.851	357.993	488.163	0.386515	2.58722	0.412834
O54782|MA2B2_MOUSE	Epididymis-specific alpha-mannosidase OS=Mus musculus OX=10090 GN=Man2b2 PE=1 SV=2	1.52096	0.179087	-0.746935	7330.91	2832.71	5850.15	2799.95	5453.02	2291.55	4498.2	0.386407	2.58795	0.412955
Q61703|ITIH2_MOUSE	Inter-alpha-trypsin inhibitor heavy chain H2 OS=Mus musculus OX=10090 GN=Itih2 PE=1 SV=1	1.55456	0.171047	-0.766884	879.188	338.074	616.707	345.595	689.594	95.4078	541.113	0.38453	2.60058	0.415069
Q8R2Q4|RRF2M_MOUSE	Ribosome-releasing factor 2, mitochondrial OS=Mus musculus OX=10090 GN=Gfm2 PE=1 SV=2"	1.55896	0.170019	-0.769502	1040.59	400.055	979.921	249.83	633.783	523.042	640.53	0.384452	2.6011	0.415158
P05201|AATC_MOUSE	Aspartate aminotransferase, cytoplasmic OS=Mus musculus OX=10090 GN=Got1 PE=1 SV=3"	2.06423	0.0845601	-1.07283	3576.22	1372.1	3076.32	993.041	1771.1	1193.2	2204.12	0.383674	2.60638	0.416037
P01899|HA11_MOUSE	H-2 class I histocompatibility antigen, D-B alpha chain OS=Mus musculus OX=10090 GN=H2-D1 PE=1 SV=2"	1.83862	0.115599	-0.937045	9855.93	3770.49	11393.6	4144.79	6465.99	1417.69	6085.44	0.382561	2.61396	0.4173
Q9QXD6|F16P1_MOUSE	Fructose-1,6-bisphosphatase 1 OS=Mus musculus OX=10090 GN=Fbp1 PE=1 SV=3"	2.8057	0.0309308	-1.50961	9524.98	3639.32	10702.6	3140.33	3488.49	2330.8	5885.66	0.382082	2.61724	0.417844
Q03311|CHLE_MOUSE	Cholinesterase OS=Mus musculus OX=10090 GN=Bche PE=1 SV=2	2.90602	0.0271209	-1.5667	5849.24	2234.82	5379.87	2102.62	2375.82	737.142	3614.42	0.38207	2.61732	0.417858
P62880|GBB2_MOUSE	Guanine nucleotide-binding protein G(I)_G(S)_G(T) subunit beta-2 OS=Mus musculus OX=10090 GN=Gnb2 PE=1 SV=3	3.11858	0.0206222	-1.68566	7477.35	2854.42	6964.63	2512.44	2592.47	1438.39	4622.94	0.381742	2.61957	0.41823
Q60936|COQ8A_MOUSE	Atypical kinase COQ8A, mitochondrial OS=Mus musculus OX=10090 GN=Coq8a PE=1 SV=2"	2.12588	0.0776499	-1.10986	12188.3	4633.85	14256.6	4693.13	6522.82	2822.08	7554.46	0.380188	2.63028	0.420002
O88587|COMT_MOUSE	Catechol O-methyltransferase OS=Mus musculus OX=10090 GN=Comt PE=1 SV=2	3.80396	0.00892637	-2.04933	13392.1	5054.55	13528.4	5516.2	4220.06	1186.19	8337.52	0.377428	2.64951	0.423166
P62918|RL8_MOUSE	60S ribosomal protein L8 OS=Mus musculus OX=10090 GN=Rpl8 PE=1 SV=2	3.13898	0.0200939	-1.69694	44551.8	16721.1	51551	14887.8	17025	4958.45	27830.7	0.375318	2.66441	0.425601
O35215|DOPD_MOUSE	D-dopachrome decarboxylase OS=Mus musculus OX=10090 GN=Ddt PE=1 SV=3	2.08937	0.0816693	-1.08794	2844.13	1065.5	2821.11	1122.2	1629.53	493.274	1778.63	0.374632	2.66929	0.426396
Q80UU9|PGRC2_MOUSE	Membrane-associated progesterone receptor component 2 OS=Mus musculus OX=10090 GN=Pgrmc2 PE=1 SV=2	2.38012	0.0547588	-1.26155	5138.19	1924.33	5579.4	1866.59	2595.41	746.318	3213.86	0.374515	2.67012	0.426531
P52825|CPT2_MOUSE	Carnitine O-palmitoyltransferase 2, mitochondrial OS=Mus musculus OX=10090 GN=Cpt2 PE=1 SV=2"	2.37121	0.0554289	-1.25626	48640.5	18188	47252	10186.2	16944.3	19303.3	30452.5	0.373928	2.67431	0.427212
P53026|RL10A_MOUSE	60S ribosomal protein L10a OS=Mus musculus OX=10090 GN=Rpl10a PE=1 SV=3	3.23172	0.0178719	-1.74783	31790.5	11721.9	30979	11752.8	11729.5	4082.72	20068.5	0.368725	2.71205	0.433298
P09055|ITB1_MOUSE	Integrin beta-1 OS=Mus musculus OX=10090 GN=Itgb1 PE=1 SV=1	2.71079	0.0350693	-1.45507	5590.62	2011.84	6436.76	1507.71	1810.33	1922.09	3578.78	0.35986	2.77886	0.443866
P46656|ADX_MOUSE	Adrenodoxin, mitochondrial OS=Mus musculus OX=10090 GN=Fdx1 PE=1 SV=1"	2.409	0.0526455	-1.27864	964.473	345.991	961.467	236.977	331.344	392.261	618.482	0.358736	2.78757	0.445225
P11276|FINC_MOUSE	Fibronectin OS=Mus musculus OX=10090 GN=Fn1 PE=1 SV=4	1.81727	0.119069	-0.924201	2433.19	869.998	2324.45	628.919	1623.24	569.907	1563.2	0.357554	2.79678	0.446658
P62751|RL23A_MOUSE	60S ribosomal protein L23a OS=Mus musculus OX=10090 GN=Rpl23a PE=1 SV=1	2.38308	0.0545382	-1.2633	8059.9	2880.7	8472.07	2461.99	4178.42	1197.56	5179.21	0.357411	2.7979	0.446833
P23953|EST1C_MOUSE	Carboxylesterase 1C OS=Mus musculus OX=10090 GN=Ces1c PE=1 SV=4	2.88854	0.0277466	-1.55679	11124.4	3960.83	11221.1	3203.08	3639.87	3369.4	7163.55	0.356049	2.8086	0.44849
O88668|CREG1_MOUSE	Protein CREG1 OS=Mus musculus OX=10090 GN=Creg1 PE=1 SV=1	1.73341	0.133723	-0.873794	12370.2	4384.48	8778.93	3057.04	8201.21	4199.51	7985.73	0.354439	2.82136	0.450459
Q99LC3|NDUAA_MOUSE	NADH dehydrogenase [ubiquinone] 1 alpha subcomplex subunit 10, mitochondrial OS=Mus musculus OX=10090 GN=Ndufa10 PE=1 SV=1"	2.2324	0.0670446	-1.17364	11831.9	4193.01	14226.3	3969.18	6620.47	1733.64	7638.92	0.354381	2.82182	0.45053
P58735|S26A1_MOUSE	Sulfate anion transporter 1 OS=Mus musculus OX=10090 GN=Slc26a1 PE=1 SV=1	3.72934	0.00974421	-2.01125	9385.42	3319.16	9967.99	3327.87	2973.97	1318.79	6066.26	0.35365	2.82765	0.451426
Q64374|RGN_MOUSE	Regucalcin OS=Mus musculus OX=10090 GN=Rgn PE=1 SV=1	3.47421	0.0132356	-1.87826	33591.1	11857.4	30180	12977.7	11662.4	4530.51	21733.7	0.352993	2.83292	0.452234
Q9CZ42|NNRD_MOUSE	ATP-dependent (S)-NAD(P)H-hydrate dehydratase OS=Mus musculus OX=10090 GN=Naxd PE=1 SV=1	2.15023	0.0750827	-1.12446	2286.86	805.939	2857.81	819.73	1340.41	317.291	1480.92	0.352422	2.83751	0.452937
O55143|AT2A2_MOUSE	Sarcoplasmic_endoplasmic reticulum calcium ATPase 2 OS=Mus musculus OX=10090 GN=Atp2a2 PE=1 SV=2	3.02804	0.0231561	-1.63533	7006.38	2459.07	6912.06	2370.94	2550.04	1586.84	4547.31	0.350976	2.8492	0.454722
Q9DCQ2|ASPD_MOUSE	Putative L-aspartate dehydrogenase OS=Mus musculus OX=10090 GN=Aspdh PE=1 SV=1	2.24059	0.0662935	-1.17853	15852.7	5558.73	12217.5	5342.43	8326.81	3885.23	10293.9	0.350649	2.85185	0.455127
P62259|1433E_MOUSE	14-3-3 protein epsilon OS=Mus musculus OX=10090 GN=Ywhae PE=1 SV=1	1.30591	0.239413	-0.620853	306.569	107.25	356.841	0	217.189	214.5	199.319	0.34984	2.85845	0.456131
Q925I1|ATAD3_MOUSE	ATPase family AAA domain-containing protein 3 OS=Mus musculus OX=10090 GN=Atad3 PE=1 SV=1	2.99862	0.024051	-1.61887	6140.42	2143.71	5451.54	1594.41	2255.44	1420.9	3996.72	0.349114	2.8644	0.457033
Q61646|HPT_MOUSE	Haptoglobin OS=Mus musculus OX=10090 GN=Hp PE=1 SV=1	3.74807	0.00953146	-2.02084	8348.23	2913.28	8482.17	1709.23	1176.25	2650.89	5434.95	0.34897	2.86558	0.457212
Q8BP40|PPA6_MOUSE	Lysophosphatidic acid phosphatase type 6 OS=Mus musculus OX=10090 GN=Acp6 PE=1 SV=1	2.36284	0.0560662	-1.2513	2793.97	973.817	3000.82	853.281	1440.64	546.053	1820.16	0.348542	2.86909	0.457745
Q9Z0R9|FADS2_MOUSE	Acyl-CoA 6-desaturase OS=Mus musculus OX=10090 GN=Fads2 PE=1 SV=1	1.42084	0.205187	-0.687851	2268.41	788.144	2106.08	832.824	2035.51	445.367	1480.27	0.347443	2.87817	0.459117
Q9WUZ9|ENTP5_MOUSE	Ectonucleoside triphosphate diphosphohydrolase 5 OS=Mus musculus OX=10090 GN=Entpd5 PE=1 SV=1	2.76046	0.0328339	-1.48368	21617.3	7507.5	20659	7593.04	8629.4	5480.75	14109.8	0.347291	2.87943	0.459306
Q7TMB8|CYFP1_MOUSE	Cytoplasmic FMR1-interacting protein 1 OS=Mus musculus OX=10090 GN=Cyfip1 PE=1 SV=1	2.3941	0.053725	-1.26982	2006.2	696.524	1709.29	554.026	1010.65	419.063	1309.68	0.347185	2.88031	0.459439
P70699|LYAG_MOUSE	Lysosomal alpha-glucosidase OS=Mus musculus OX=10090 GN=Gaa PE=1 SV=2	1.70166	0.139719	-0.854743	16236.8	5634.92	10836.9	3973.79	11483.5	4837.01	10601.8	0.347047	2.88145	0.459612
Q9EQH2|ERAP1_MOUSE	Endoplasmic reticulum aminopeptidase 1 OS=Mus musculus OX=10090 GN=Erap1 PE=1 SV=2	3.97174	0.00735236	-2.13357	15831.5	5444.36	14237.4	4354.21	4061.43	3295.93	10387.1	0.343894	2.90787	0.463575
P50285|FMO1_MOUSE	Dimethylaniline monooxygenase [N-oxide-forming] 1 OS=Mus musculus OX=10090 GN=Fmo1 PE=1 SV=1	4.45387	0.00431121	-2.3654	62280.1	21414.7	55375.9	21581.9	15119.4	10399.2	40865.4	0.343845	2.90829	0.463637
Q9DBH5|LMAN2_MOUSE	Vesicular integral-membrane protein VIP36 OS=Mus musculus OX=10090 GN=Lman2 PE=1 SV=2	2.1727	0.0727905	-1.13793	1160.32	398.27	1016.7	444.874	628.337	311.871	762.05	0.343241	2.9134	0.4644
Q99JY9|ARP3_MOUSE	Actin-related protein 3 OS=Mus musculus OX=10090 GN=Actr3 PE=1 SV=3	1.75873	0.129122	-0.889	2280.62	780.744	2360.46	685.439	1691.3	220.648	1499.88	0.342338	2.92109	0.465545
O35643|AP1B1_MOUSE	AP-1 complex subunit beta-1 OS=Mus musculus OX=10090 GN=Ap1b1 PE=1 SV=2	1.31163	0.237595	-0.624162	1281.86	438.299	819.497	489.793	1276.56	157.796	843.562	0.341924	2.92463	0.466071
Q9D7N9|APMAP_MOUSE	Adipocyte plasma membrane-associated protein OS=Mus musculus OX=10090 GN=Apmap PE=1 SV=1	2.33189	0.0584894	-1.23292	5040.86	1722.8	5614.77	1706.2	2816.94	404.295	3318.05	0.341768	2.92596	0.466268
Q9D0F3|LMAN1_MOUSE	Protein ERGIC-53 OS=Mus musculus OX=10090 GN=Lman1 PE=1 SV=1	2.26928	0.0637307	-1.19565	40457	13825.6	44847.4	13790	21602.4	9178.19	26631.5	0.341734	2.92625	0.466311
Q3UJU9|RMD3_MOUSE	Regulator of microtubule dynamics protein 3 OS=Mus musculus OX=10090 GN=Rmdn3 PE=1 SV=2	6.70602	0.000533964	-3.27249	6169.22	2084.7	6046.04	2143.03	1058.22	603.396	4084.52	0.33792	2.95928	0.471186
P50247|SAHH_MOUSE	Adenosylhomocysteinase OS=Mus musculus OX=10090 GN=Ahcy PE=1 SV=3	2.83027	0.029947	-1.52365	15265.6	5143.31	16742.8	5601.8	6307.88	3372.61	10122.3	0.336921	2.96806	0.472472
P08226|APOE_MOUSE	Apolipoprotein E OS=Mus musculus OX=10090 GN=Apoe PE=1 SV=2	7.60719	0.000268754	-3.57065	54296.6	18199.7	54131.2	19129	3946.45	8630.72	36096.8	0.335191	2.98337	0.474708
Q8BGA8|ACSM5_MOUSE	Acyl-coenzyme A synthetase ACSM5, mitochondrial OS=Mus musculus OX=10090 GN=Acsm5 PE=1 SV=1"	1.90393	0.105593	-0.976365	13636.7	4568.62	13215.7	2541.2	8339.95	4602.52	9068.08	0.335024	2.98486	0.474924
A2AS89|SPEB_MOUSE	Agmatinase, mitochondrial OS=Mus musculus OX=10090 GN=Agmat PE=1 SV=1"	2.93769	0.0260257	-1.5846	16260.4	5425.63	15355.3	3263.54	5397.47	5027.78	10834.8	0.333671	2.99696	0.476681
Q60932|VDAC1_MOUSE	Voltage-dependent anion-selective channel protein 1 OS=Mus musculus OX=10090 GN=Vdac1 PE=1 SV=3	3.49209	0.0129504	-1.88772	49430.8	16482.9	47562.6	14895.6	15868.7	10210.9	32947.8	0.333454	2.99891	0.476963
P35564|CALX_MOUSE	Calnexin OS=Mus musculus OX=10090 GN=Canx PE=1 SV=1	2.38365	0.0544963	-1.26363	6510.11	2162.69	6241.78	1754.79	3257.94	1640.59	4347.42	0.332205	3.01019	0.478594
O09043|NAPSA_MOUSE	Napsin-A OS=Mus musculus OX=10090 GN=Napsa PE=1 SV=1	2.28819	0.0620983	-1.20692	5820.51	1927.16	6653.1	1745.62	2861.33	1842.06	3893.35	0.331099	3.02025	0.480043
Q2TBE6|P4K2A_MOUSE	Phosphatidylinositol 4-kinase type 2-alpha OS=Mus musculus OX=10090 GN=Pi4k2a PE=1 SV=1	1.9302	0.101816	-0.992185	708.145	234.167	602.203	282.884	459.319	173.847	473.978	0.330677	3.0241	0.480596
Q9QZD8|DIC_MOUSE	Mitochondrial dicarboxylate carrier OS=Mus musculus OX=10090 GN=Slc25a10 PE=1 SV=2	3.29771	0.0164548	-1.78371	43716	14449.8	42575.2	15763.7	16028.5	7624.11	29266.1	0.330539	3.02536	0.480777
Q9QYF1|RDH11_MOUSE	Retinol dehydrogenase 11 OS=Mus musculus OX=10090 GN=Rdh11 PE=1 SV=2	3.47395	0.0132399	-1.87812	10171.1	3341.7	11338.4	3237.29	3769.21	1118.95	6829.42	0.328548	3.0437	0.483401
Q9DCF9|SSRG_MOUSE	Translocon-associated protein subunit gamma OS=Mus musculus OX=10090 GN=Ssr3 PE=1 SV=1	3.45809	0.0134988	-1.8697	10439.1	3426.45	10954.8	3236.24	4009.27	612.721	7012.69	0.328231	3.04663	0.48382
O88962|CP8B1_MOUSE	7-alpha-hydroxycholest-4-en-3-one 12-alpha-hydroxylase OS=Mus musculus OX=10090 GN=Cyp8b1 PE=1 SV=1	4.25061	0.00537655	-2.2695	8377.88	2737.09	7658.21	2900.89	2564.34	684.461	5640.79	0.326704	3.06087	0.485845
P47754|CAZA2_MOUSE	F-actin-capping protein subunit alpha-2 OS=Mus musculus OX=10090 GN=Capza2 PE=1 SV=3	1.30628	0.239295	-0.621066	2556.47	828.784	1570.88	659.051	2614.86	399.456	1727.69	0.32419	3.08461	0.4892
Q8BNI4|DERL2_MOUSE	Derlin-2 OS=Mus musculus OX=10090 GN=Derl2 PE=1 SV=2	1.79385	0.122996	-0.910108	388.694	125.862	430.704	0	150.017	251.725	262.831	0.323809	3.08824	0.489711
Q922D8|C1TC_MOUSE	C-1-tetrahydrofolate synthase, cytoplasmic OS=Mus musculus OX=10090 GN=Mthfd1 PE=1 SV=4"	5.50189	0.00151221	-2.82039	47959.7	15528.3	51385.1	16359.8	8691.57	7965.01	32431.4	0.323779	3.08853	0.489752
P62717|RL18A_MOUSE	60S ribosomal protein L18a OS=Mus musculus OX=10090 GN=Rpl18a PE=1 SV=1	2.12294	0.0779658	-1.1081	3853.22	1236.7	3620.05	1210.52	2387.02	615.115	2616.52	0.320952	3.11573	0.49356
Q01279|EGFR_MOUSE	Epidermal growth factor receptor OS=Mus musculus OX=10090 GN=Egfr PE=1 SV=1	3.07761	0.0217293	-1.66295	8396.21	2693.74	6806.91	2709.86	3602.93	867.002	5702.47	0.320828	3.11694	0.493728
P62874|GBB1_MOUSE	Guanine nucleotide-binding protein G(I)_G(S)_G(T) subunit beta-1 OS=Mus musculus OX=10090 GN=Gnb1 PE=1 SV=3	1.93709	0.100848	-0.996331	1949.07	624.029	2111.44	620.44	1354.44	192.727	1325.04	0.320167	3.12337	0.494623
P09671|SODM_MOUSE	Superoxide dismutase [Mn], mitochondrial OS=Mus musculus OX=10090 GN=Sod2 PE=1 SV=3"	3.17348	0.0192339	-1.71593	15731.6	5025.43	14985.3	5438.83	6645.83	1165.51	10706.1	0.319449	3.13039	0.495599
Q61335|BAP31_MOUSE	B-cell receptor-associated protein 31 OS=Mus musculus OX=10090 GN=Bcap31 PE=1 SV=4	2.37758	0.0549491	-1.26004	1702.21	542.748	1857.97	589.73	883.282	413.607	1159.46	0.31885	3.13627	0.496414
Q9D8E6|RL4_MOUSE	60S ribosomal protein L4 OS=Mus musculus OX=10090 GN=Rpl4 PE=1 SV=3	5.54291	0.00145562	-2.83695	19494.7	6204.7	19662.4	7024.88	3492.19	3286.27	13290	0.318276	3.14192	0.497196
Q8K3J1|NDUS8_MOUSE	NADH dehydrogenase [ubiquinone] iron-sulfur protein 8, mitochondrial OS=Mus musculus OX=10090 GN=Ndufs8 PE=1 SV=1"	3.46007	0.0134662	-1.87076	5901.91	1870.89	5836.04	1936.26	2308.83	313.526	4031.02	0.316997	3.1546	0.498945
P47963|RL13_MOUSE	60S ribosomal protein L13 OS=Mus musculus OX=10090 GN=Rpl13 PE=1 SV=3	2.2279	0.0674608	-1.17095	13193	4155.77	12296.9	3385.28	7101.91	3921.81	9037.26	0.314997	3.17463	0.501693
Q9CPY7|AMPL_MOUSE	Cytosol aminopeptidase OS=Mus musculus OX=10090 GN=Lap3 PE=1 SV=3	4.85795	0.00282873	-2.54841	10593.6	3300.31	10095.1	3529.49	2905.55	757.285	7293.28	0.311539	3.20987	0.506488
Q8VCM8|NCLN_MOUSE	Nicalin OS=Mus musculus OX=10090 GN=Ncln PE=1 SV=2	4.10308	0.00633539	-2.19823	12221.9	3805.51	11799	3539.59	2660.64	3122.7	8416.38	0.311369	3.21163	0.506725
Q9CZW5|TOM70_MOUSE	Mitochondrial import receptor subunit TOM70 OS=Mus musculus OX=10090 GN=Tomm70 PE=1 SV=2	2.97199	0.0248933	-1.60392	9312.13	2891.77	8602.44	1918.5	3375.68	2696.7	6420.36	0.310538	3.22022	0.507885
Q01339|APOH_MOUSE	Beta-2-glycoprotein 1 OS=Mus musculus OX=10090 GN=Apoh PE=1 SV=1	1.68995	0.141995	-0.847726	4967.13	1540.99	4727.54	1540.18	4009.86	601.437	3426.14	0.310238	3.22334	0.508306
Q8VCH8|UBXN4_MOUSE	UBX domain-containing protein 4 OS=Mus musculus OX=10090 GN=Ubxn4 PE=1 SV=1	1.30529	0.239611	-0.620494	517.918	160.659	457.142	92.2374	502.742	216.562	357.259	0.310201	3.22372	0.508357
P14824|ANXA6_MOUSE	Annexin A6 OS=Mus musculus OX=10090 GN=Anxa6 PE=1 SV=3	2.14488	0.0756394	-1.12125	34700.6	10758	31383.3	9907.13	21525.5	5922.04	23942.5	0.310025	3.22555	0.508603
P37040|NCPR_MOUSE	NADPH--cytochrome P450 reductase OS=Mus musculus OX=10090 GN=Por PE=1 SV=2	6.8928	0.000460412	-3.33685	97788.6	30203.5	99890	29229.5	10395.9	16628.1	67585.2	0.308865	3.23766	0.510232
Q9CR57|RL14_MOUSE	60S ribosomal protein L14 OS=Mus musculus OX=10090 GN=Rpl14 PE=1 SV=3	4.34849	0.00483051	-2.31601	51806.2	15934.5	51598.5	15662.4	14990.2	6891.55	35871.7	0.307579	3.25119	0.512043
P47911|RL6_MOUSE	60S ribosomal protein L6 OS=Mus musculus OX=10090 GN=Rpl6 PE=1 SV=3	4.13248	0.00612997	-2.21254	42818.1	13068.4	43611.3	13956.6	11941.2	8044.17	29749.7	0.305208	3.27646	0.515404
Q9QYC7|VKGC_MOUSE	Vitamin K-dependent gamma-carboxylase OS=Mus musculus OX=10090 GN=Ggcx PE=1 SV=1	1.92309	0.102824	-0.987905	5186.96	1579.39	6128.84	1431.76	3670.8	775.605	3607.57	0.304493	3.28415	0.516423
P56379|ATP68_MOUSE	ATP synthase subunit ATP5MJ, mitochondrial OS=Mus musculus OX=10090 GN=Atp5mj PE=1 SV=1"	5.83159	0.00111934	-2.95104	2438.9	742.57	2400.94	534.181	271.667	514.449	1696.33	0.304469	3.28441	0.516457
Q6ZQI3|MLEC_MOUSE	Malectin OS=Mus musculus OX=10090 GN=Mlec PE=1 SV=2	6.82644	0.000485125	-3.31415	5561.6	1693.1	5459.64	1692.31	497.937	1018.15	3868.49	0.304428	3.28485	0.516516
Q9QXZ6|SO1A1_MOUSE	Solute carrier organic anion transporter family member 1A1 OS=Mus musculus OX=10090 GN=Slco1a1 PE=1 SV=1	3.21032	0.0183597	-1.73614	3966.6	1207.38	4106.74	1260.3	1422.28	965.395	2759.22	0.304386	3.28531	0.516576
P17563|SBP1_MOUSE	Methanethiol oxidase OS=Mus musculus OX=10090 GN=Selenbp1 PE=1 SV=2	5.42338	0.00162761	-2.78845	13027.7	3964.96	12654.4	3426.87	2951.02	1568.79	9062.72	0.304349	3.28571	0.516629
Q60930|VDAC2_MOUSE	Voltage-dependent anion-selective channel protein 2 OS=Mus musculus OX=10090 GN=Vdac2 PE=1 SV=2	2.87499	0.028242	-1.5491	47585.1	14399.3	46119.1	13426.2	20638.8	10343.8	33185.8	0.302601	3.30468	0.51913
P04919|B3AT_MOUSE	Band 3 anion transport protein OS=Mus musculus OX=10090 GN=Slc4a1 PE=1 SV=1	1.29747	0.242117	-0.615974	3903.93	1176.09	2272.06	993.372	4186.65	390.799	2727.84	0.301258	3.31941	0.521061
P26041|MOES_MOUSE	Moesin OS=Mus musculus OX=10090 GN=Msn PE=1 SV=3	2.24443	0.0659439	-1.18083	2320.88	696.773	2412.18	687.196	1326.9	577.769	1624.11	0.300219	3.3309	0.522562
P35979|RL12_MOUSE	60S ribosomal protein L12 OS=Mus musculus OX=10090 GN=Rpl12 PE=1 SV=2	4.44063	0.00437286	-2.35923	28842.3	8624.26	29001.3	8405.3	7616.88	4990.07	20218	0.299015	3.34432	0.524308
Q9D023|MPC2_MOUSE	Mitochondrial pyruvate carrier 2 OS=Mus musculus OX=10090 GN=Mpc2 PE=1 SV=1	1.98177	0.0947917	-1.02323	5187.38	1549.03	5284.91	1545.64	3655.31	347.866	3638.35	0.298615	3.3488	0.524889
Q91W64|CP270_MOUSE	Cytochrome P450 2C70 OS=Mus musculus OX=10090 GN=Cyp2c70 PE=1 SV=2	7.07241	0.000400463	-3.39744	34115.1	10102.3	33650.6	9027.41	5100.38	4483.06	24012.8	0.296124	3.37696	0.528526
Q9D1M7|FKB11_MOUSE	Peptidyl-prolyl cis-trans isomerase FKBP11 OS=Mus musculus OX=10090 GN=Fkbp11 PE=1 SV=1	2.42	0.0518634	-1.28514	1604.63	473.172	1171.82	495.608	928.678	109.329	1131.46	0.294879	3.39122	0.530356
P23780|BGAL_MOUSE	Beta-galactosidase OS=Mus musculus OX=10090 GN=Glb1 PE=1 SV=1	2.13107	0.0770954	-1.11297	8763.99	2574.45	6749.38	2459.86	5550.22	1714.03	6189.54	0.293753	3.40422	0.532017
Q8BVE3|VATH_MOUSE	V-type proton ATPase subunit H OS=Mus musculus OX=10090 GN=Atp6v1h PE=1 SV=1	1.20145	0.274846	-0.56091	477.339	139.001	329.415	133.261	539.783	160.778	338.338	0.291199	3.43408	0.53581
P34927|ASGR1_MOUSE	Asialoglycoprotein receptor 1 OS=Mus musculus OX=10090 GN=Asgr1 PE=1 SV=4	3.80613	0.00890379	-2.05043	8595.06	2482.46	8113.43	2667.55	2985.14	1185.65	6112.6	0.288824	3.46231	0.539367
Q9CQ54|NDUC2_MOUSE	NADH dehydrogenase [ubiquinone] 1 subunit C2 OS=Mus musculus OX=10090 GN=Ndufc2 PE=1 SV=1	3.69711	0.010123	-1.99469	1427.89	411.21	1358.41	427.111	504.98	217.898	1016.68	0.287985	3.4724	0.54063
E9Q5K4|CP2CN_MOUSE	Cytochrome P450 2C44 OS=Mus musculus OX=10090 GN=Cyp2c23 PE=1 SV=1	4.5685	0.00381652	-2.41833	8189.76	2352.32	7928.18	2431.12	2258.66	1195.46	5837.43	0.287227	3.48156	0.541774
Q02248|CTNB1_MOUSE	Catenin beta-1 OS=Mus musculus OX=10090 GN=Ctnnb1 PE=1 SV=1	9.68826	6.9364e-05	-4.15887	8455.49	2427.89	8412.18	2792.46	892.455	867.082	6027.6	0.287138	3.48265	0.54191
Q9JII6|AK1A1_MOUSE	Aldo-keto reductase family 1 member A1 OS=Mus musculus OX=10090 GN=Akr1a1 PE=1 SV=3	2.42952	0.0511958	-1.29077	5413.03	1552.45	5895.98	1698.22	3098.02	708.74	3860.58	0.2868	3.48676	0.542421
Q8VCI0|PLBL1_MOUSE	Phospholipase B-like 1 OS=Mus musculus OX=10090 GN=Plbd1 PE=1 SV=1	2.1829	0.071774	-1.14403	23386	6693.93	17726.9	5445.11	14342	5310.18	16692	0.286237	3.49361	0.543274
Q76M72|S22AR_MOUSE	Solute carrier family 22 member 27 OS=Mus musculus OX=10090 GN=Slc22a27 PE=1 SV=1	5.2623	0.0018972	-2.72189	20550.6	5874.05	21217.7	5568.49	4159.08	3716.98	14676.5	0.285834	3.49853	0.543886
Q64464|CP3AD_MOUSE	Cytochrome P450 3A13 OS=Mus musculus OX=10090 GN=Cyp3a13 PE=1 SV=1	4.46196	0.00427403	-2.36916	46167.9	13177.6	47132.9	12395.6	13451.9	6140.89	32990.3	0.285428	3.50351	0.544503
Q9D1D4|TMEDA_MOUSE	Transmembrane emp24 domain-containing protein 10 OS=Mus musculus OX=10090 GN=Tmed10 PE=1 SV=1	2.61343	0.0399364	-1.39863	4953.85	1412.31	5524.78	1510.41	2679.48	407.348	3541.54	0.285094	3.50761	0.545012
P19221|THRB_MOUSE	Prothrombin OS=Mus musculus OX=10090 GN=F2 PE=1 SV=1	4.1684	0.005889	-2.22996	2847.51	809.428	2793.26	914.778	905.639	368.85	2038.08	0.284258	3.51793	0.546287
Q571F8|GLSL_MOUSE	Glutaminase liver isoform, mitochondrial OS=Mus musculus OX=10090 GN=Gls2 PE=1 SV=2"	3.05555	0.0223522	-1.65068	13596.4	3860.16	12412.4	3979.94	5963.76	2246.39	9736.22	0.283911	3.52223	0.546818
P11352|GPX1_MOUSE	Glutathione peroxidase 1 OS=Mus musculus OX=10090 GN=Gpx1 PE=1 SV=2	4.77622	0.00307475	-2.51219	81696.3	23103	76034.7	15704.6	18111.5	16551.8	58593.3	0.282791	3.53618	0.548534
O09158|CP3AP_MOUSE	Cytochrome P450 3A25 OS=Mus musculus OX=10090 GN=Cyp3a25 PE=1 SV=1	6.94118	0.000443307	-3.3533	115974	32580.9	107279	31592.1	19719.2	13730.6	83393.5	0.280932	3.55959	0.551399
P14869|RLA0_MOUSE	60S acidic ribosomal protein P0 OS=Mus musculus OX=10090 GN=Rplp0 PE=1 SV=3	5.07002	0.00228795	-2.64055	32200.8	8962.19	30023.3	9001.89	8430.42	3600.45	23238.6	0.278322	3.59296	0.555452
Q9JKJ9|CP39A_MOUSE	24-hydroxycholesterol 7-alpha-hydroxylase OS=Mus musculus OX=10090 GN=Cyp39a1 PE=1 SV=1	1.31851	0.235426	-0.628146	6928.63	1926.96	4701.79	1623.54	7454.19	1412.64	5001.67	0.278115	3.59563	0.555776
Q9DCX8|IYD1_MOUSE	Iodotyrosine deiodinase 1 OS=Mus musculus OX=10090 GN=Iyd PE=1 SV=1	1.46558	0.193116	-0.714181	7174.61	1993.95	6917.66	1216.72	6761.04	2066.46	5180.66	0.277918	3.59819	0.556084
Q64FW2|RETST_MOUSE	All-trans-retinol 13,14-reductase OS=Mus musculus OX=10090 GN=Retsat PE=1 SV=3"	2.34577	0.0573893	-1.24117	2770.78	769.782	2882.24	379.706	1499.43	813.82	2001	0.277822	3.59943	0.556234
O88908|SOAT2_MOUSE	Sterol O-acyltransferase 2 OS=Mus musculus OX=10090 GN=Soat2 PE=1 SV=2	2.42259	0.0516806	-1.28667	9492.89	2632.01	9505.93	2638.32	5634.04	582.588	6860.88	0.277262	3.6067	0.55711
O55022|PGRC1_MOUSE	Membrane-associated progesterone receptor component 1 OS=Mus musculus OX=10090 GN=Pgrmc1 PE=1 SV=4	5.04564	0.00234372	-2.63009	101195	27940.1	103959	28919.6	17897.4	22865.4	73255.1	0.276101	3.62186	0.558932
O88822|SC5D_MOUSE	Lathosterol oxidase OS=Mus musculus OX=10090 GN=Sc5d PE=2 SV=2	2.40389	0.0530135	-1.27561	3485.96	961.489	4118.35	1013.3	2055.14	433.31	2524.47	0.275817	3.62559	0.559378
Q9CY27|TECR_MOUSE	Very-long-chain enoyl-CoA reductase OS=Mus musculus OX=10090 GN=Tecr PE=1 SV=1	2.5477	0.0436255	-1.36026	9232.86	2545.3	9150.07	2111.38	4917.94	1837.14	6687.56	0.275679	3.62741	0.559597
P27786|CP17A_MOUSE	Steroid 17-alpha-hydroxylase_17,20 lyase OS=Mus musculus OX=10090 GN=Cyp17a1 PE=1 SV=1"	3.5501	0.0120706	-1.91827	12494.9	3410.64	11975.7	3618.43	4740.66	1928.08	9084.26	0.272963	3.6635	0.563897
A2AKQ0|S35D1_MOUSE	UDP-glucuronic acid_UDP-N-acetylgalactosamine transporter OS=Mus musculus OX=10090 GN=Slc35d1 PE=2 SV=2	0.702654	0.508601	-0.293623	206.772	56.21	0	0	413.544	112.42	150.562	0.271845	3.67856	0.565678
Q8VEM8|MPCP_MOUSE	Phosphate carrier protein, mitochondrial OS=Mus musculus OX=10090 GN=Slc25a3 PE=1 SV=1"	4.79092	0.00302877	-2.51873	138982	37682.5	138100	39715.7	41405.8	8593.04	101299	0.271133	3.68823	0.566818
Q9R099|TBL2_MOUSE	Transducin beta-like protein 2 OS=Mus musculus OX=10090 GN=Tbl2 PE=1 SV=2	5.47095	0.00155653	-2.80784	3944.85	1067.46	4303.11	1023.98	945.421	461.117	2877.39	0.270596	3.69555	0.567679
P14246|GTR2_MOUSE	Solute carrier family 2, facilitated glucose transporter member 2 OS=Mus musculus OX=10090 GN=Slc2a2 PE=1 SV=3"	3.00682	0.0237978	-1.62346	16674.3	4450.94	14858.4	4317.76	7921.38	1831.71	12223.3	0.266934	3.74624	0.573596
Q8VCM7|FIBG_MOUSE	Fibrinogen gamma chain OS=Mus musculus OX=10090 GN=Fgg PE=1 SV=1	3.54522	0.012142	-1.91571	6991.42	1850.99	6253.11	1886.53	2643.13	1193.07	5140.43	0.264751	3.77713	0.577162
P32261|ANT3_MOUSE	Antithrombin-III OS=Mus musculus OX=10090 GN=Serpinc1 PE=1 SV=1	2.68038	0.0365175	-1.4375	18095.7	4773.43	16251.1	5227.91	9861.38	1252.21	13322.3	0.263788	3.79093	0.578745
Q61838|PZP_MOUSE	Pregnancy zone protein OS=Mus musculus OX=10090 GN=Pzp PE=1 SV=3	1.46852	0.192345	-0.715919	3539.2	932.757	3284.51	995.675	3540.37	257.784	2606.44	0.263551	3.79434	0.579136
Q9JJL3|SO1B2_MOUSE	Solute carrier organic anion transporter family member 1B2 OS=Mus musculus OX=10090 GN=Slco1b2 PE=1 SV=1	4.15353	0.00598746	-2.22276	15590	4104.74	14303.3	4115.44	5325.32	1491.83	11485.2	0.263294	3.79803	0.579559
P08752|GNAI2_MOUSE	Guanine nucleotide-binding protein G(i) subunit alpha-2 OS=Mus musculus OX=10090 GN=Gnai2 PE=1 SV=5	2.25433	0.0650532	-1.18673	13834.8	3639.03	15944.9	2357.17	8114.3	3997.44	10195.8	0.263034	3.80179	0.579988
Q9QY30|ABCBB_MOUSE	Bile salt export pump OS=Mus musculus OX=10090 GN=Abcb11 PE=1 SV=2	1.92642	0.102351	-0.989907	5970.54	1559.22	5208.27	1807.13	4512.94	779.834	4411.32	0.261152	3.82919	0.583107
Q9JMA7|CP341_MOUSE	Cytochrome P450 3A41 OS=Mus musculus OX=10090 GN=Cyp3a41a PE=1 SV=2	2.76744	0.0325324	-1.48768	7264.49	1891.16	7183.01	1873.58	3569.05	1530.21	5373.33	0.260329	3.84129	0.584477
P00186|CP1A2_MOUSE	Cytochrome P450 1A2 OS=Mus musculus OX=10090 GN=Cyp1a2 PE=1 SV=1	3.62393	0.0110451	-1.95683	30301.1	7875.01	27510.4	8666.8	11705.5	4020.4	22426.1	0.259892	3.84775	0.585207
Q8K0R6|GLTD2_MOUSE	Glycolipid transfer protein domain-containing protein 2 OS=Mus musculus OX=10090 GN=Gltpd2 PE=1 SV=1	2.58715	0.0413699	-1.38332	3790.58	984.973	3507.38	440.247	1654.9	1401.9	2805.61	0.259848	3.84841	0.585281
Q505D7|OPA3_MOUSE	Optic atrophy 3 protein homolog OS=Mus musculus OX=10090 GN=Opa3 PE=1 SV=1	2.71123	0.0350486	-1.45533	2300.77	597.367	2749.87	459.409	1168.91	461.072	1703.4	0.259638	3.85152	0.585632
P46978|STT3A_MOUSE	Dolichyl-diphosphooligosaccharide--protein glycosyltransferase subunit STT3A OS=Mus musculus OX=10090 GN=Stt3a PE=1 SV=1	2.21427	0.0687381	-1.1628	20714.2	5356.96	16567.9	4549.25	13594.7	2755.87	15357.3	0.258613	3.86678	0.58735
Q9WVD5|ORNT1_MOUSE	Mitochondrial ornithine transporter 1 OS=Mus musculus OX=10090 GN=Slc25a15 PE=1 SV=1	1.4198	0.205473	-0.687245	8253.56	2127.49	5090.06	1412.29	8441.87	1789.49	6126.07	0.257766	3.87948	0.588774
Q99L88|SNTB1_MOUSE	Beta-1-syntrophin OS=Mus musculus OX=10090 GN=Sntb1 PE=1 SV=4	3.72991	0.00973769	-2.01154	13119.4	3369.59	12344.1	3405.06	4994.79	1543.7	9749.8	0.25684	3.89347	0.590337
P56657|CP240_MOUSE	Cytochrome P450 2C40 OS=Mus musculus OX=10090 GN=Cyp2c40 PE=1 SV=2	5.9359	0.00102038	-2.99124	175435	44965.1	156910	43576.8	39036	20214.7	130470	0.256307	3.90158	0.59124
Q9JI39|ABCBA_MOUSE	ATP-binding cassette sub-family B member 10, mitochondrial OS=Mus musculus OX=10090 GN=Abcb10 PE=1 SV=1"	1.47068	0.191783	-0.717191	597.151	152.768	664.202	0	521.399	305.535	444.384	0.255827	3.90889	0.592053
Q9WVJ3|CBPQ_MOUSE	Carboxypeptidase Q OS=Mus musculus OX=10090 GN=Cpq PE=1 SV=1	1.81058	0.120178	-0.920176	15282	3896.85	11424.5	3075.39	12322.3	2514.58	11385.2	0.254996	3.92163	0.593467
P47955|RLA1_MOUSE	60S acidic ribosomal protein P1 OS=Mus musculus OX=10090 GN=Rplp1 PE=1 SV=1	5.22978	0.00195761	-2.70827	5609.37	1427.95	5122.82	1445.68	1511.54	521.823	4181.42	0.254566	3.92826	0.5942
E9PV24|FIBA_MOUSE	Fibrinogen alpha chain OS=Mus musculus OX=10090 GN=Fga PE=1 SV=1	4.8817	0.00276147	-2.55886	8119.87	2058.62	7659.5	1697.77	1899.99	1598.93	6061.25	0.253528	3.94433	0.595974
Q91ZV0|MIA2_MOUSE	Melanoma inhibitory activity protein 2 OS=Mus musculus OX=10090 GN=Mia2 PE=1 SV=3	6.1576	0.000841486	-3.07495	1151.95	291.989	1125.21	319.774	173.771	218.679	859.956	0.253475	3.94516	0.596065
P97501|FMO3_MOUSE	Dimethylaniline monooxygenase [N-oxide-forming] 3 OS=Mus musculus OX=10090 GN=Fmo3 PE=1 SV=1	6.04384	0.000928356	-3.03229	103865	26250.9	106155	25580.9	21288.1	14369.2	77614.4	0.25274	3.95663	0.597326
O88531|PPT1_MOUSE	Palmitoyl-protein thioesterase 1 OS=Mus musculus OX=10090 GN=Ppt1 PE=1 SV=2	1.73606	0.133234	-0.875386	9205.05	2323.82	6174.01	2182.94	7776.49	1539.46	6881.23	0.25245	3.96118	0.597824
P56404|AQP8_MOUSE	Aquaporin-8 OS=Mus musculus OX=10090 GN=Aqp8 PE=2 SV=1	1.54424	0.17348	-0.760749	3756.55	944.392	2934.71	993.855	3610.56	478.539	2812.16	0.251398	3.97775	0.599638
P33267|CP2F2_MOUSE	Cytochrome P450 2F2 OS=Mus musculus OX=10090 GN=Cyp2f2 PE=1 SV=1	5.10618	0.00220796	-2.65601	150124	37670.2	143785	35512.9	38212.8	21905.2	112454	0.250927	3.98522	0.600452
Q99M87|DNJA3_MOUSE	DnaJ homolog subfamily A member 3, mitochondrial OS=Mus musculus OX=10090 GN=Dnaja3 PE=1 SV=1"	3.77587	0.00922489	-2.03504	3311.37	830.893	3438.22	770.155	1225.08	474.769	2480.48	0.250921	3.98532	0.600463
P28843|DPP4_MOUSE	Dipeptidyl peptidase 4 OS=Mus musculus OX=10090 GN=Dpp4 PE=1 SV=3	3.67233	0.0104253	-1.98191	23011.4	5755.61	20484.3	5295.04	8671.68	3622.1	17255.8	0.25012	3.99809	0.601852
Q99MN9|PCCB_MOUSE	Propionyl-CoA carboxylase beta chain, mitochondrial OS=Mus musculus OX=10090 GN=Pccb PE=1 SV=2"	2.52851	0.0447694	-1.34902	30794.2	7700.77	34310.6	6314.24	17492.4	5261.19	23093.5	0.250072	3.99885	0.601935
P24457|CP2DB_MOUSE	Cytochrome P450 2D11 OS=Mus musculus OX=10090 GN=Cyp2d11 PE=2 SV=2	1.80797	0.120614	-0.918601	802.279	200.3	916.729	107.65	605.857	276.377	601.978	0.249664	4.00538	0.602644
Q64459|CP3AB_MOUSE	Cytochrome P450 3A11 OS=Mus musculus OX=10090 GN=Cyp3a11 PE=1 SV=1	7.54499	0.000281172	-3.55103	159010	39632.5	150335	37812.5	27338.4	15936.3	119378	0.249245	4.01211	0.603373
Q9CPV4|GLOD4_MOUSE	Glyoxalase domain-containing protein 4 OS=Mus musculus OX=10090 GN=Glod4 PE=1 SV=1	1.37807	0.217368	-0.662804	2134.78	531.153	1500.38	486.693	2302.52	339.12	1603.63	0.248809	4.01914	0.604133
P52430|PON1_MOUSE	Serum paraoxonase_arylesterase 1 OS=Mus musculus OX=10090 GN=Pon1 PE=1 SV=2	4.63909	0.00354386	-2.45052	63061.8	15648.6	59328.8	14284.2	18778.2	8074.99	47413.2	0.248147	4.02988	0.605292
Q4LDG0|S27A5_MOUSE	Bile acyl-CoA synthetase OS=Mus musculus OX=10090 GN=Slc27a5 PE=1 SV=2	3.39586	0.0145701	-1.83654	80282.4	19898.6	86649.4	16656.6	33167.9	12831.1	60383.8	0.247857	4.03458	0.605799
Q9DCP2|S38A3_MOUSE	Sodium-coupled neutral amino acid transporter 3 OS=Mus musculus OX=10090 GN=Slc38a3 PE=1 SV=1	4.39703	0.00458303	-2.33885	4080.11	1004.27	4059.07	893.219	1200.3	718.764	3075.84	0.246138	4.06277	0.608822
P80318|TCPG_MOUSE	T-complex protein 1 subunit gamma OS=Mus musculus OX=10090 GN=Cct3 PE=1 SV=1	6.12494	0.000865437	-3.06276	11712.3	2857.33	10992.8	2623.08	2519.17	1419.24	8854.96	0.24396	4.09903	0.612682
P22315|HEMH_MOUSE	Ferrochelatase, mitochondrial OS=Mus musculus OX=10090 GN=Fech PE=1 SV=2"	2.48083	0.0477513	-1.32101	6416.15	1564.82	5518.83	1670.31	3751.61	1105.32	4851.33	0.243887	4.10025	0.612811
Q6ZWV7|RL35_MOUSE	60S ribosomal protein L35 OS=Mus musculus OX=10090 GN=Rpl35 PE=1 SV=1	2.33069	0.0585853	-1.23221	4524.42	1102.06	5231.55	1088.64	2840.86	744.406	3422.36	0.243581	4.10541	0.613357
Q9EP96|SO1A4_MOUSE	Solute carrier organic anion transporter family member 1A4 OS=Mus musculus OX=10090 GN=Slco1a4 PE=1 SV=1	1.17705	0.283748	-0.547067	1149.36	279.447	768.471	342.793	1465.68	191.318	869.909	0.243133	4.11297	0.614155
Q8K0E8|FIBB_MOUSE	Fibrinogen beta chain OS=Mus musculus OX=10090 GN=Fgb PE=1 SV=1	1.46503	0.19326	-0.713859	3196.12	775.764	2205.52	665.177	3274.76	439.847	2420.35	0.242721	4.11996	0.614893
Q9JHW2|NIT2_MOUSE	Omega-amidase NIT2 OS=Mus musculus OX=10090 GN=Nit2 PE=1 SV=1	2.89404	0.0275479	-1.55991	4420.07	1072.58	4235.49	755.765	2084.98	1002.26	3347.49	0.242662	4.12096	0.614998
P97872|FMO5_MOUSE	Flavin-containing monooxygenase 5 OS=Mus musculus OX=10090 GN=Fmo5 PE=1 SV=4	9.75699	6.66311e-05	-4.17632	135465	32797.1	139460	32446.1	16827.4	12638.5	102668	0.242107	4.1304	0.615992
Q925N2|SFXN2_MOUSE	Sideroflexin-2 OS=Mus musculus OX=10090 GN=Sfxn2 PE=1 SV=1	3.14192	0.020019	-1.69856	7223.98	1746.64	6538.26	1817.59	3407.94	736.485	5477.33	0.241784	4.13592	0.616572
Q9JIZ0|CMLO1_MOUSE	Probable N-acetyltransferase CML1 OS=Mus musculus OX=10090 GN=Cml1 PE=1 SV=1	5.44477	0.0015952	-2.79719	22378.3	5408.8	21323.6	5151.78	5758.89	2385.31	16969.5	0.241698	4.1374	0.616727
Q9JLJ4|ELOV2_MOUSE	Elongation of very long chain fatty acids protein 2 OS=Mus musculus OX=10090 GN=Elovl2 PE=1 SV=1	2.31363	0.0599697	-1.22207	1948.82	464.418	1799.18	428.586	1271.56	172.289	1484.4	0.238308	4.19626	0.622862
Q3U3R4|LMF1_MOUSE	Lipase maturation factor 1 OS=Mus musculus OX=10090 GN=Lmf1 PE=1 SV=1	1.66645	0.146674	-0.833648	967.149	229.835	716.909	218.86	862.5	197.809	737.314	0.237642	4.20801	0.624077
Q8R0G7|SPNS1_MOUSE	Protein spinster homolog 1 OS=Mus musculus OX=10090 GN=Spns1 PE=2 SV=1	1.46681	0.192794	-0.714907	1198.55	282.768	797.696	350.317	1232.91	197.843	915.785	0.235925	4.23864	0.627227
Q9DCT2|NDUS3_MOUSE	NADH dehydrogenase [ubiquinone] iron-sulfur protein 3, mitochondrial OS=Mus musculus OX=10090 GN=Ndufs3 PE=1 SV=2"	3.28751	0.0166655	-1.77818	27015.3	6370.76	31733.5	6968.35	12291.9	2578.22	20644.5	0.23582	4.24052	0.627419
Q64458|CP2CT_MOUSE	Cytochrome P450 2C29 OS=Mus musculus OX=10090 GN=Cyp2c29 PE=1 SV=2	7.25414	0.000348761	-3.45747	88705.3	20864.6	84555.6	19738.2	14842.3	11381.8	67840.7	0.235213	4.25147	0.628539
P01901|HA1B_MOUSE	H-2 class I histocompatibility antigen, K-B alpha chain OS=Mus musculus OX=10090 GN=H2-K1 PE=1 SV=1"	3.74801	0.00953204	-2.02081	24015.8	5633.44	22427.1	5626.3	9786.07	672.36	18382.4	0.234572	4.26308	0.629724
Q8CHQ9|NT8F2_MOUSE	N-acetyltransferase family 8 member 2 OS=Mus musculus OX=10090 GN=Nat8f2 PE=1 SV=1	3.01096	0.0236713	-1.62578	39349.6	9223.03	45457.9	8848.96	18288.3	8123.3	30126.6	0.234387	4.26645	0.630067
P17665|COX7C_MOUSE	Cytochrome c oxidase subunit 7C, mitochondrial OS=Mus musculus OX=10090 GN=Cox7c PE=1 SV=1"	1.13296	0.300466	-0.522205	1772.11	414.001	780.607	377.733	2348.57	481.702	1358.11	0.23362	4.28045	0.631489
P56593|CP2AC_MOUSE	Cytochrome P450 2A12 OS=Mus musculus OX=10090 GN=Cyp2a12 PE=1 SV=2	5.48938	0.00152995	-2.81532	105060	24544.1	100627	22733.1	24472.1	16176.1	80515.8	0.23362	4.28045	0.63149
Q91YW3|DNJC3_MOUSE	DnaJ homolog subfamily C member 3 OS=Mus musculus OX=10090 GN=Dnajc3 PE=1 SV=1	5.80335	0.00114799	-2.94006	18351.9	4277.38	17558.3	3745.43	4440.73	1951.18	14074.5	0.233075	4.29046	0.632504
Q64435|UD16_MOUSE	UDP-glucuronosyltransferase 1-6 OS=Mus musculus OX=10090 GN=Ugt1a6 PE=1 SV=1	4.68507	0.0033781	-2.47133	24127.7	5605.06	22177.9	5719.13	7757	1533.36	18522.6	0.232308	4.30463	0.633936
Q8BVW3|TRI14_MOUSE	Tripartite motif-containing protein 14 OS=Mus musculus OX=10090 GN=Trim14 PE=1 SV=2	2.07968	0.0827717	-1.08212	7931.63	1813.87	5432.62	1652.4	5850.33	622.614	6117.76	0.228688	4.37276	0.640756
O35129|PHB2_MOUSE	Prohibitin-2 OS=Mus musculus OX=10090 GN=Phb2 PE=1 SV=1	4.80207	0.0029944	-2.52369	63088.5	14344.9	64163.4	6006.54	8140.52	18597.5	48743.6	0.227377	4.39798	0.643253
Q8C165|P20D1_MOUSE	N-fatty-acyl-amino acid synthase_hydrolase PM20D1 OS=Mus musculus OX=10090 GN=Pm20d1 PE=1 SV=1	7.32897	0.000329734	-3.48184	16975.7	3855.03	16647.9	3302.46	2469.04	2593.02	13120.6	0.227091	4.40352	0.6438
Q9DBL1|ACDSB_MOUSE	Short_branched chain specific acyl-CoA dehydrogenase, mitochondrial OS=Mus musculus OX=10090 GN=Acadsb PE=1 SV=1"	2.60297	0.0405006	-1.39254	16528	3706.62	17597.7	3277.55	9771.15	1254.7	12821.4	0.224262	4.45906	0.649244
Q9CR67|TMM33_MOUSE	Transmembrane protein 33 OS=Mus musculus OX=10090 GN=Tmem33 PE=1 SV=1	2.16355	0.0737152	-1.13244	2808.28	628.412	2805.66	668.262	2004.13	209.885	2179.87	0.223771	4.46885	0.650196
Q9JIM1|S29A1_MOUSE	Equilibrative nucleoside transporter 1 OS=Mus musculus OX=10090 GN=Slc29a1 PE=1 SV=3	5.41555	0.00163965	-2.78525	7643.53	1708.32	7519.27	1485.14	2056.83	757.567	5935.2	0.223499	4.47428	0.650723
Q62452|UD19_MOUSE	UDP-glucuronosyltransferase 1A9 OS=Mus musculus OX=10090 GN=Ugt1a9 PE=1 SV=3	2.36207	0.0561255	-1.25084	9567.91	2127.59	6966.94	2214.7	6264.96	662.074	7440.32	0.222367	4.49707	0.652929
Q9DCV4|RMD1_MOUSE	Regulator of microtubule dynamics protein 1 OS=Mus musculus OX=10090 GN=Rmdn1 PE=1 SV=2	1.62895	0.154446	-0.811222	1338.55	297.127	1261.9	245.855	1228.9	353.161	1041.42	0.221977	4.50497	0.653692
P47962|RL5_MOUSE	60S ribosomal protein L5 OS=Mus musculus OX=10090 GN=Rpl5 PE=1 SV=3	8.82573	0.000117523	-3.92988	20948	4631.05	21631.5	5214.56	3391.93	1472.02	16316.9	0.221074	4.52337	0.655463
Q71RI9|KAT3_MOUSE	Kynurenine--oxoglutarate transaminase 3 OS=Mus musculus OX=10090 GN=Kyat3 PE=1 SV=1	2.04143	0.0872713	-1.05913	8635.61	1908.58	7137.2	2031.75	6566.9	557.25	6727.03	0.221013	4.52461	0.655582
Q6XVG2|CP254_MOUSE	Cytochrome P450 2C54 OS=Mus musculus OX=10090 GN=Cyp2c54 PE=1 SV=1	3.807	0.00889466	-2.05087	97697.5	21539.6	93662.1	25459.7	37726.7	13321	76157.9	0.220473	4.53571	0.656645
Q91WD5|NDUS2_MOUSE	NADH dehydrogenase [ubiquinone] iron-sulfur protein 2, mitochondrial OS=Mus musculus OX=10090 GN=Ndufs2 PE=1 SV=1"	9.09852	9.90007e-05	-4.00436	11624.1	2555.73	11620.1	2201.89	1639.18	1134.3	9068.39	0.219864	4.54826	0.657845
Q6P5E4|UGGG1_MOUSE	UDP-glucose:glycoprotein glucosyltransferase 1 OS=Mus musculus OX=10090 GN=Uggt1 PE=1 SV=4	1.49066	0.186639	-0.728997	4435.07	973.508	3038.87	958.729	4627.11	399.475	3461.56	0.219502	4.55576	0.658561
P24369|PPIB_MOUSE	Peptidyl-prolyl cis-trans isomerase B OS=Mus musculus OX=10090 GN=Ppib PE=1 SV=2	2.61245	0.039989	-1.39806	42518.9	9318.25	40910.5	6793.56	24720.2	5911.89	33200.6	0.219156	4.56297	0.659247
P12787|COX5A_MOUSE	Cytochrome c oxidase subunit 5A, mitochondrial OS=Mus musculus OX=10090 GN=Cox5a PE=1 SV=2"	3.57952	0.0116499	-1.93368	2897.23	634.456	3196.68	718.791	1222.89	320.904	2262.78	0.218987	4.56648	0.659581
Q9CXV1|DHSD_MOUSE	Succinate dehydrogenase [ubiquinone] cytochrome b small subunit, mitochondrial OS=Mus musculus OX=10090 GN=Sdhd PE=1 SV=2"	3.0484	0.0225582	-1.64669	1303.05	285.195	1458.37	309.318	663.352	76.9275	1017.86	0.218867	4.56898	0.659819
P28665|MUG1_MOUSE	Murinoglobulin-1 OS=Mus musculus OX=10090 GN=Mug1 PE=1 SV=3	4.72078	0.00325537	-2.4874	11284.5	2468.8	13008.9	2321.16	3553.93	1148.3	8815.68	0.218778	4.57084	0.659996
Q9ERS2|NDUAD_MOUSE	NADH dehydrogenase [ubiquinone] 1 alpha subcomplex subunit 13 OS=Mus musculus OX=10090 GN=Ndufa13 PE=1 SV=3	6.39744	0.000687132	-3.16296	15406.4	3364.83	15154.6	4117.97	3405.12	1605.19	12041.6	0.218405	4.57865	0.660738
P20918|PLMN_MOUSE	Plasminogen OS=Mus musculus OX=10090 GN=Plg PE=1 SV=3	10.2223	5.1089e-05	-4.29167	19099.1	4167.34	19121.4	3964.64	2443.51	1601.23	14931.7	0.218196	4.58304	0.661153
Q99K51|PLST_MOUSE	Plastin-3 OS=Mus musculus OX=10090 GN=Pls3 PE=1 SV=3	2.97347	0.0248457	-1.60475	6590.42	1433.3	6031.78	1547.98	3412.91	619.925	5157.12	0.217482	4.59808	0.662577
Q8VDN2|AT1A1_MOUSE	Sodium_potassium-transporting ATPase subunit alpha-1 OS=Mus musculus OX=10090 GN=Atp1a1 PE=1 SV=1	5.41974	0.0016332	-2.78696	75133.3	16305.6	72555.6	14418.4	19777.6	8950.65	58827.6	0.217023	4.60781	0.663495
P36552|HEM6_MOUSE	Oxygen-dependent coproporphyrinogen-III oxidase, mitochondrial OS=Mus musculus OX=10090 GN=Cpox PE=1 SV=2"	2.84027	0.0295563	-1.52935	6849.66	1483.76	6932.86	1698.52	3748.35	475.891	5365.91	0.216617	4.61643	0.664307
Q80Z19|MUC2_MOUSE	Mucin-2 (Fragments) OS=Mus musculus OX=10090 GN=Muc2 PE=1 SV=2	1.97712	0.095404	-1.02043	5346.05	1149.82	4888.02	1106.55	4159.08	848.677	4196.23	0.215079	4.64945	0.667402
Q14DH7|ACSS3_MOUSE	Acyl-CoA synthetase short-chain family member 3, mitochondrial OS=Mus musculus OX=10090 GN=Acss3 PE=1 SV=2"	3.94095	0.00761629	-2.11826	31294.8	6708.64	27486.6	6517.11	11729.9	4253.41	24586.1	0.214369	4.66484	0.668837
Q9CZS1|AL1B1_MOUSE	Aldehyde dehydrogenase X, mitochondrial OS=Mus musculus OX=10090 GN=Aldh1b1 PE=1 SV=1"	3.50937	0.0126812	-1.89684	34795.4	7434.29	33919.9	4840.84	14284.5	6253.04	27361.1	0.213657	4.68039	0.670282
Q91VR2|ATPG_MOUSE	ATP synthase subunit gamma, mitochondrial OS=Mus musculus OX=10090 GN=Atp5f1c PE=1 SV=1"	3.51952	0.0125258	-1.90219	46144.5	9820.34	43069.1	11400	20249.4	4004	36324.1	0.212817	4.69887	0.671993
O08677|KNG1_MOUSE	Kininogen-1 OS=Mus musculus OX=10090 GN=Kng1 PE=1 SV=1	1.84231	0.115009	-0.939269	7819.89	1660.61	8317.68	1191.01	6534.14	1419.1	6159.28	0.212358	4.70904	0.672932
P60710|ACTB_MOUSE	Actin, cytoplasmic 1 OS=Mus musculus OX=10090 GN=Actb PE=1 SV=1"	4.66056	0.00346534	-2.46025	540745	113920	564235	97383.1	174285	56338.9	426825	0.210673	4.74669	0.676391
P51658|DHB2_MOUSE	Estradiol 17-beta-dehydrogenase 2 OS=Mus musculus OX=10090 GN=Hsd17b2 PE=1 SV=2	6.01986	0.000947946	-3.02322	34112	7147.88	32246.4	6907.55	8198.03	3611.77	26964.1	0.209542	4.77232	0.67873
Q9ET30|TM9S3_MOUSE	Transmembrane 9 superfamily member 3 OS=Mus musculus OX=10090 GN=Tm9sf3 PE=1 SV=1	4.79053	0.00302996	-2.51856	6716.73	1406.4	7293.62	1301.67	1989.09	979.119	5310.33	0.209388	4.77583	0.679049
O55125|NIPS1_MOUSE	Protein NipSnap homolog 1 OS=Mus musculus OX=10090 GN=Nipsnap1 PE=1 SV=1	4.03822	0.00681647	-2.16644	63115.3	13136.6	66646.7	11255	22936.3	9307.51	49978.7	0.208136	4.80454	0.681652
P57780|ACTN4_MOUSE	Alpha-actinin-4 OS=Mus musculus OX=10090 GN=Actn4 PE=1 SV=1	3.38831	0.0147062	-1.8325	25190	5237.98	22942.1	4742.15	11395.4	2973.68	19952.1	0.207938	4.80912	0.682065
Q8R4N0|CLYBL_MOUSE	Citramalyl-CoA lyase, mitochondrial OS=Mus musculus OX=10090 GN=Clybl PE=1 SV=2"	1.74569	0.131473	-0.881164	2046.79	425.537	1660.5	397.89	1847.27	194.149	1621.25	0.207904	4.8099	0.682136
P17717|UDB17_MOUSE	UDP-glucuronosyltransferase 2B17 OS=Mus musculus OX=10090 GN=Ugt2b17 PE=1 SV=1	4.18134	0.00580486	-2.23621	289970	60130.4	257870	57427	104816	33159.4	229840	0.207368	4.82235	0.683259
P29416|HEXA_MOUSE	Beta-hexosaminidase subunit alpha OS=Mus musculus OX=10090 GN=Hexa PE=1 SV=2	1.26942	0.251306	-0.599797	7292.29	1510.06	4441.3	1031.56	8999.68	1413.85	5782.23	0.207076	4.82914	0.68387
P18760|COF1_MOUSE	Cofilin-1 OS=Mus musculus OX=10090 GN=Cfl1 PE=1 SV=3	3.20676	0.0184422	-1.73419	19720	4071.03	18652.7	4008.05	9597.47	1773.54	15648.9	0.206442	4.84398	0.685202
Q9QZW0|AT11C_MOUSE	Phospholipid-transporting ATPase 11C OS=Mus musculus OX=10090 GN=Atp11c PE=1 SV=2	11.4453	2.66972e-05	-4.57353	8817.52	1811.73	8606.92	1799.65	861.766	869.534	7005.79	0.20547	4.8669	0.687252
Q8BH59|CMC1_MOUSE	Calcium-binding mitochondrial carrier protein Aralar1 OS=Mus musculus OX=10090 GN=Slc25a12 PE=1 SV=1	2.1135	0.07899	-1.10243	4775.35	978.617	3721.22	1085.18	3581.81	281.328	3796.73	0.204931	4.87969	0.688393
Q8JZN5|ACAD9_MOUSE	Complex I assembly factor ACAD9, mitochondrial OS=Mus musculus OX=10090 GN=Acad9 PE=1 SV=2"	2.46903	0.0485216	-1.31406	11341.3	2321.12	8819.27	2815.97	7227.98	1069.64	9020.21	0.20466	4.88614	0.688966
Q9CPQ8|ATP5L_MOUSE	ATP synthase subunit g, mitochondrial OS=Mus musculus OX=10090 GN=Atp5mg PE=1 SV=1"	4.16784	0.00589271	-2.22969	17308.4	3537.02	18191.3	2874.03	6110.58	2516.28	13771.4	0.204353	4.8935	0.689619
Q924Z4|CERS2_MOUSE	Ceramide synthase 2 OS=Mus musculus OX=10090 GN=Cers2 PE=1 SV=1	2.49165	0.0470568	-1.32738	6713.43	1371.83	8074.02	753.783	4035.92	1447.38	5341.61	0.204341	4.89379	0.689645
Q8JZU2|TXTP_MOUSE	Tricarboxylate transport protein, mitochondrial OS=Mus musculus OX=10090 GN=Slc25a1 PE=1 SV=1"	3.95632	0.00748321	-2.12591	40394.6	8224.7	42193.9	7588.47	15059.7	6137.89	32169.9	0.203609	4.91137	0.691203
Q9CQC7|NDUB4_MOUSE	NADH dehydrogenase [ubiquinone] 1 beta subcomplex subunit 4 OS=Mus musculus OX=10090 GN=Ndufb4 PE=1 SV=3	1.58019	0.165145	-0.782135	5224.59	1059.69	4853.87	880.854	5250.62	467.512	4164.9	0.202827	4.93032	0.692875
Q3ULD5|MCCB_MOUSE	Methylcrotonoyl-CoA carboxylase beta chain, mitochondrial OS=Mus musculus OX=10090 GN=Mccc2 PE=1 SV=1"	2.43748	0.0506448	-1.29547	7060.49	1430.49	6369.31	1035.05	4528.8	911.055	5630	0.202605	4.93572	0.693351
P07758|A1AT1_MOUSE	Alpha-1-antitrypsin 1-1 OS=Mus musculus OX=10090 GN=Serpina1a PE=1 SV=4	5.43428	0.001611	-2.79291	6785.6	1369.58	6283.73	1212.92	1908.43	575.384	5416.02	0.201836	4.95452	0.695002
Q91VT4|CBR4_MOUSE	Carbonyl reductase family member 4 OS=Mus musculus OX=10090 GN=Cbr4 PE=1 SV=2	5.47299	0.00155356	-2.80867	7685.96	1550.96	7787.53	1506.01	2144.83	652.623	6135	0.201791	4.95562	0.695098
Q78XF5|OSTC_MOUSE	Oligosaccharyltransferase complex subunit OSTC OS=Mus musculus OX=10090 GN=Ostc PE=1 SV=1	3.53073	0.0123568	-1.9081	12032.1	2424.42	12048.9	2428.08	5348.18	1007.8	9607.67	0.201496	4.96287	0.695733
Q8BH95|ECHM_MOUSE	Enoyl-CoA hydratase, mitochondrial OS=Mus musculus OX=10090 GN=Echs1 PE=1 SV=1"	3.10551	0.0209684	-1.67843	81397.7	16229.9	81045.9	19500.2	40758	10009.5	65167.8	0.19939	5.0153	0.700297
P26043|RADI_MOUSE	Radixin OS=Mus musculus OX=10090 GN=Rdx PE=1 SV=3	6.58517	0.000588739	-3.23008	31195.3	6207.38	29335.5	4857.19	6656.21	3645.54	24987.9	0.198985	5.02552	0.701181
Q71KT5|ERG24_MOUSE	Delta(14)-sterol reductase TM7SF2 OS=Mus musculus OX=10090 GN=Tm7sf2 PE=1 SV=2	2.36822	0.0556558	-1.25449	6226.87	1237.57	6076.74	1190.47	4202.3	307.651	4989.3	0.198747	5.03153	0.7017
P45878|FKBP2_MOUSE	Peptidyl-prolyl cis-trans isomerase FKBP2 OS=Mus musculus OX=10090 GN=Fkbp2 PE=1 SV=1	4.09023	0.0064276	-2.19195	18079.4	3589.6	20107	3576.22	6731.33	2210.76	14489.8	0.198547	5.0366	0.702138
P14211|CALR_MOUSE	Calreticulin OS=Mus musculus OX=10090 GN=Calr PE=1 SV=1	4.5112	0.00405534	-2.39197	47963.8	9419.04	43321.4	9982.5	15975.1	6067.4	38544.7	0.196378	5.09221	0.706907
P22599|A1AT2_MOUSE	Alpha-1-antitrypsin 1-2 OS=Mus musculus OX=10090 GN=Serpina1b PE=1 SV=2	6.04944	0.000923843	-3.0344	34656.1	6750.76	37248.3	7026.18	9010.06	1983.26	27905.3	0.194793	5.13366	0.710427
Q99M71|EPDR1_MOUSE	Mammalian ependymin-related protein 1 OS=Mus musculus OX=10090 GN=Epdr1 PE=1 SV=1	3.44038	0.0137946	-1.86029	2247.59	436.297	2027.04	434.083	1049.14	89.6397	1811.29	0.194118	5.15151	0.711935
Q8VEB4|PAG15_MOUSE	Phospholipase A2 group XV OS=Mus musculus OX=10090 GN=Pla2g15 PE=1 SV=1	2.14662	0.0754579	-1.1223	5893.44	1142.18	5968.41	1019.86	4395.28	526.908	4751.27	0.193805	5.15983	0.712636
Q91XE8|TM205_MOUSE	Transmembrane protein 205 OS=Mus musculus OX=10090 GN=Tmem205 PE=1 SV=1	4.18875	0.00575727	-2.23978	24440.6	4668.95	22189.4	4379.49	8968.93	2945.95	19771.6	0.191033	5.2347	0.718892
Q791V5|MTCH2_MOUSE	Mitochondrial carrier homolog 2 OS=Mus musculus OX=10090 GN=Mtch2 PE=1 SV=1	7.40783	0.000310965	-3.50729	76439.5	14466.6	77276.1	15624.1	14267.8	8739.72	61972.9	0.189255	5.28388	0.722953
P07309|TTHY_MOUSE	Transthyretin OS=Mus musculus OX=10090 GN=Ttr PE=1 SV=1	5.97054	0.000989756	-3.00447	5120.14	962.269	4950.48	849.936	1349.47	344.672	4157.87	0.187938	5.3209	0.725985
P61620|S61A1_MOUSE	Protein transport protein Sec61 subunit alpha isoform 1 OS=Mus musculus OX=10090 GN=Sec61a1 PE=1 SV=2	8.94209	0.000109171	-3.96189	15489.6	2901.82	15848.8	2924.53	2645.54	963.089	12587.7	0.18734	5.33788	0.727369
Q00897|A1AT4_MOUSE	Alpha-1-antitrypsin 1-4 OS=Mus musculus OX=10090 GN=Serpina1d PE=1 SV=1	5.16666	0.00208118	-2.68169	12679.4	2348.38	12985.2	2177.6	3702.04	1512.52	10331	0.185213	5.3992	0.732329
P56391|CX6B1_MOUSE	Cytochrome c oxidase subunit 6B1 OS=Mus musculus OX=10090 GN=Cox6b1 PE=1 SV=2	3.47885	0.013161	-1.88071	19714.2	3644.88	19818.3	2118.11	8566.87	3457.58	16069.3	0.184886	5.40874	0.733096
P46735|MYO1B_MOUSE	Unconventional myosin-Ib OS=Mus musculus OX=10090 GN=Myo1b PE=1 SV=3	2.27726	0.0630361	-1.20041	3285.77	607.127	3155.49	665.604	2307.47	458.134	2678.65	0.184775	5.412	0.733358
Q9CPW4|ARPC5_MOUSE	Actin-related protein 2_3 complex subunit 5 OS=Mus musculus OX=10090 GN=Arpc5 PE=1 SV=3	6.90927	0.000454504	-3.34246	4071.44	748.695	4321.36	661.302	822.681	498.293	3322.74	0.18389	5.43805	0.735443
P63260|ACTG_MOUSE	Actin, cytoplasmic 2 OS=Mus musculus OX=10090 GN=Actg1 PE=1 SV=1"	4.73965	0.00319259	-2.49586	1986.03	363.434	2113.56	382.972	622.516	285.093	1622.6	0.182995	5.46464	0.737562
P50172|DHI1_MOUSE	Corticosteroid 11-beta-dehydrogenase isozyme 1 OS=Mus musculus OX=10090 GN=Hsd11b1 PE=1 SV=3	6.93046	0.000447031	-3.34966	66709.5	12191.8	64612.2	11805.9	13088.3	8730.28	54517.7	0.182759	5.47168	0.738121
P11589|MUP2_MOUSE	Major urinary protein 2 OS=Mus musculus OX=10090 GN=Mup2 PE=1 SV=1	4.26713	0.00527969	-2.27739	41924.6	7612.49	35645.5	7733.3	15497.6	4296.03	34312.1	0.181576	5.50734	0.740942
Q8VCC2|EST1_MOUSE	Liver carboxylesterase 1 OS=Mus musculus OX=10090 GN=Ces1 PE=1 SV=1	6.61429	0.000574972	-3.24035	37698.1	6828.84	37573.7	7475.29	8150.52	4549.12	30869.2	0.181146	5.52042	0.741972
P18572|BASI_MOUSE	Basigin OS=Mus musculus OX=10090 GN=Bsg PE=1 SV=2	7.51507	0.00028738	-3.54154	13394.2	2424.29	12328.9	2289.73	2681.93	1153.45	10969.9	0.180995	5.52502	0.742334
O89023|TPP1_MOUSE	Tripeptidyl-peptidase 1 OS=Mus musculus OX=10090 GN=Tpp1 PE=1 SV=2	2.74357	0.0335766	-1.47396	122193	22108	101500	23104.3	72418.2	8872.22	100085	0.180927	5.52709	0.742497
O08807|PRDX4_MOUSE	Peroxiredoxin-4 OS=Mus musculus OX=10090 GN=Prdx4 PE=1 SV=1	4.5162	0.0040338	-2.39429	21018.4	3801.27	21080.9	3821.78	7476.94	1493.25	17217.1	0.180855	5.5293	0.74267
Q9EQI8|RM46_MOUSE	39S ribosomal protein L46, mitochondrial OS=Mus musculus OX=10090 GN=Mrpl46 PE=1 SV=1"	3.00241	0.0239336	-1.62099	1417.58	254.146	1256.37	111.215	678.249	374.965	1163.43	0.179282	5.5778	0.746463
Q5FW57|GLYAL_MOUSE	Glycine N-acyltransferase-like protein OS=Mus musculus OX=10090 GN=Gm4952 PE=1 SV=3	1.78062	0.125269	-0.902155	13806.9	2463.18	10740	2477.51	12737.1	324.653	11343.7	0.178402	5.6053	0.748599
P70245|EBP_MOUSE	3-beta-hydroxysteroid-Delta(8),Delta(7)-isomerase OS=Mus musculus OX=10090 GN=Ebp PE=1 SV=3"	6.81835	0.000488239	-3.31137	59112.4	10543.7	61629.9	10528.1	13794.7	3559.32	48568.8	0.178366	5.60644	0.748687
Q80UM7|MOGS_MOUSE	Mannosyl-oligosaccharide glucosidase OS=Mus musculus OX=10090 GN=Mogs PE=1 SV=1	4.11904	0.00622294	-2.206	31768.4	5660.86	26721.3	3966.86	11970.4	4171.91	26107.6	0.178191	5.61194	0.749113
Q99J99|THTM_MOUSE	3-mercaptopyruvate sulfurtransferase OS=Mus musculus OX=10090 GN=Mpst PE=1 SV=4	5.83072	0.00112021	-2.9507	18970.4	3380.16	18884	3397.41	5110.57	1574.51	15590.2	0.178181	5.61228	0.749139
P85094|ISC2A_MOUSE	Isochorismatase domain-containing protein 2A OS=Mus musculus OX=10090 GN=Isoc2a PE=1 SV=1	2.74408	0.0335538	-1.47426	15768.1	2781.25	12691.9	2683.26	9295.72	1784.14	12986.9	0.176384	5.66944	0.75354
Q9CQJ8|NDUB9_MOUSE	NADH dehydrogenase [ubiquinone] 1 beta subcomplex subunit 9 OS=Mus musculus OX=10090 GN=Ndufb9 PE=1 SV=3	2.50566	0.0461736	-1.33561	1713.89	302.191	1831.27	241.375	1066.8	362.798	1411.7	0.176319	5.67153	0.7537
Q68FF9|S5A1_MOUSE	3-oxo-5-alpha-steroid 4-dehydrogenase 1 OS=Mus musculus OX=10090 GN=Srd5a1 PE=2 SV=2	1.70651	0.138787	-0.85765	1296.17	227.469	1179.48	0	1166.96	454.937	1068.7	0.175493	5.69822	0.755739
Q9D1Q6|ERP44_MOUSE	Endoplasmic reticulum resident protein 44 OS=Mus musculus OX=10090 GN=Erp44 PE=1 SV=1	6.21873	0.000798673	-3.09763	32067.7	5579.6	31714	5978.62	7816.4	3387.34	26488.1	0.173994	5.74731	0.759465
Q9DC69|NDUA9_MOUSE	NADH dehydrogenase [ubiquinone] 1 alpha subcomplex subunit 9, mitochondrial OS=Mus musculus OX=10090 GN=Ndufa9 PE=1 SV=2"	4.44691	0.00434349	-2.36216	8965	1549.66	9384.46	1188.78	3131.18	1148.16	7415.34	0.172857	5.78513	0.762313
Q8JZZ0|UD3A2_MOUSE	UDP-glucuronosyltransferase 3A2 OS=Mus musculus OX=10090 GN=Ugt3a2 PE=1 SV=2	3.60894	0.0112452	-1.94903	68436.8	11813.4	66278.8	11840.7	29638.1	10308	56623.4	0.172618	5.79315	0.762915
O89017|LGMN_MOUSE	Legumain OS=Mus musculus OX=10090 GN=Lgmn PE=1 SV=1	1.63662	0.152825	-0.815806	5313.49	914.515	3315.26	859.352	5371.12	221.288	4398.98	0.172112	5.81018	0.764189
Q9JLZ3|AUHM_MOUSE	Methylglutaconyl-CoA hydratase, mitochondrial OS=Mus musculus OX=10090 GN=Auh PE=1 SV=1"	4.60023	0.00369113	-2.43284	4333.15	735.622	4769.34	777.591	1556.58	152.772	3597.52	0.169766	5.89045	0.770149
Q8CFX1|G6PE_MOUSE	GDH_6PGL endoplasmic bifunctional protein OS=Mus musculus OX=10090 GN=H6pd PE=1 SV=2	5.73886	0.00121661	-2.91485	15521.4	2628.51	14794.6	2547.79	4245.74	1470.53	12892.9	0.169348	5.90501	0.771221
Q9JLF6|TGM1_MOUSE	Protein-glutamine gamma-glutamyltransferase K OS=Mus musculus OX=10090 GN=Tgm1 PE=1 SV=2	2.83487	0.0297667	-1.52627	3822.95	647.32	4086.28	761.936	2187.81	482.607	3175.63	0.169325	5.90581	0.771279
P27773|PDIA3_MOUSE	Protein disulfide-isomerase A3 OS=Mus musculus OX=10090 GN=Pdia3 PE=1 SV=2	16.2858	3.4115e-06	-5.46705	131502	22236.7	134005	21210.4	7190.51	11329.4	109266	0.169097	5.91376	0.771864
P08003|PDIA4_MOUSE	Protein disulfide-isomerase A4 OS=Mus musculus OX=10090 GN=Pdia4 PE=1 SV=3	8.84095	0.00011639	-3.93408	109114	18316	105474	15963.1	18019.5	9859.21	90798.1	0.167861	5.95732	0.775051
Q9Z239|PLM_MOUSE	Phospholemman OS=Mus musculus OX=10090 GN=Fxyd1 PE=1 SV=1	3.12011	0.020582	-1.68651	2576.97	429.986	2911.59	184.522	1219.35	638.115	2146.99	0.166857	5.99316	0.777656
P20852|CP2A5_MOUSE	Cytochrome P450 2A5 OS=Mus musculus OX=10090 GN=Cyp2a5 PE=2 SV=1	6.31178	0.000738201	-3.13183	32372.1	5390.44	29650.3	4587.56	8107.47	2713.82	26981.6	0.166515	6.00546	0.778546
Q3TC72|FAHD2_MOUSE	Fumarylacetoacetate hydrolase domain-containing protein 2A OS=Mus musculus OX=10090 GN=Fahd2 PE=1 SV=1	3.10882	0.0208802	-1.68026	2238.01	372.527	2234.69	290.234	1186.48	180.457	1865.48	0.166455	6.00765	0.778704
Q01853|TERA_MOUSE	Transitional endoplasmic reticulum ATPase OS=Mus musculus OX=10090 GN=Vcp PE=1 SV=4	2.79744	0.0312692	-1.50488	7180.58	1190.24	8041.15	1063.51	4241.89	589.984	5990.34	0.165758	6.03288	0.780525
Q8R1S0|COQ6_MOUSE	Ubiquinone biosynthesis monooxygenase COQ6, mitochondrial OS=Mus musculus OX=10090 GN=Coq6 PE=1 SV=3"	1.72213	0.135824	-0.867024	1632.44	269.776	1056.36	310.138	1570.62	193.825	1362.66	0.16526	6.05109	0.781833
P63030|MPC1_MOUSE	Mitochondrial pyruvate carrier 1 OS=Mus musculus OX=10090 GN=Mpc1 PE=1 SV=1	4.20293	0.00566736	-2.24662	11810.3	1948.19	10444.5	1714.24	4339.11	1787.77	9862.12	0.164957	6.06219	0.78263
P03930|ATP8_MOUSE	ATP synthase protein 8 OS=Mus musculus OX=10090 GN=Mtatp8 PE=1 SV=1	6.28171	0.000757153	-3.12082	24214.5	3986.71	25148.6	3384.39	6120.3	2004.56	20227.8	0.164642	6.0738	0.78346
P20029|BIP_MOUSE	Endoplasmic reticulum chaperone BiP OS=Mus musculus OX=10090 GN=Hspa5 PE=1 SV=3	6.46026	0.000652244	-3.18559	251108	41323.8	229240	42836.5	61982	19395.9	209784	0.164566	6.07659	0.78366
P11859|ANGT_MOUSE	Angiotensinogen OS=Mus musculus OX=10090 GN=Agt PE=1 SV=1	1.8348	0.116213	-0.934746	2353.07	386.022	1916.87	357.84	2143.26	62.1478	1967.05	0.16405	6.0957	0.785023
Q6GQT9|NOMO1_MOUSE	Nodal modulator 1 OS=Mus musculus OX=10090 GN=Nomo1 PE=1 SV=1	8.42167	0.000152841	-3.81576	18536.7	3038.41	19997.5	2629.89	3508.87	1111.02	15498.2	0.163914	6.10077	0.785385
P04938|MUP11_MOUSE	Major urinary protein 11 OS=Mus musculus OX=10090 GN=Mup11 PE=1 SV=2	5.9992	0.00096521	-3.01538	133639	21804.4	123135	19750	30615.7	21276.9	111834	0.163159	6.12898	0.787389
Q922R8|PDIA6_MOUSE	Protein disulfide-isomerase A6 OS=Mus musculus OX=10090 GN=Pdia6 PE=1 SV=3	4.77512	0.00307821	-2.5117	62954.6	10222.9	66092.9	8160.66	21064.5	6639.2	52731.8	0.162385	6.1582	0.789454
Q62186|SSRD_MOUSE	Translocon-associated protein subunit delta OS=Mus musculus OX=10090 GN=Ssr4 PE=1 SV=1	8.04486	0.000197245	-3.70499	19033.9	3087.14	19477.2	2778.62	3177.97	2370.11	15946.7	0.162192	6.16554	0.789971
Q9CQR4|ACO13_MOUSE	Acyl-coenzyme A thioesterase 13 OS=Mus musculus OX=10090 GN=Acot13 PE=1 SV=1	1.59038	0.162852	-0.788206	12454	2016.1	6625.86	2013.18	13094.9	906.874	10437.9	0.161884	6.17727	0.790797
Q63886|UD11_MOUSE	UDP-glucuronosyltransferase 1A1 OS=Mus musculus OX=10090 GN=Ugt1a1 PE=1 SV=2	5.43793	0.00160549	-2.79439	392088	63114.8	348680	60601.7	116442	32869.4	328973	0.160971	6.21229	0.793252
Q9JLJ2|AL9A1_MOUSE	4-trimethylaminobutyraldehyde dehydrogenase OS=Mus musculus OX=10090 GN=Aldh9a1 PE=1 SV=1	3.87951	0.00817529	-2.0875	9478.41	1523.97	8637.72	1339.14	4043.94	680.165	7954.45	0.160783	6.21957	0.79376
P16406|AMPE_MOUSE	Glutamyl aminopeptidase OS=Mus musculus OX=10090 GN=Enpep PE=1 SV=1	1.92948	0.101917	-0.991752	7520.17	1206.57	6598.95	1028.57	6521.77	543.184	6313.61	0.160444	6.23269	0.794676
Q9CQZ5|NDUA6_MOUSE	NADH dehydrogenase [ubiquinone] 1 alpha subcomplex subunit 6 OS=Mus musculus OX=10090 GN=Ndufa6 PE=1 SV=1	3.8236	0.00872402	-2.05928	5346.1	857.255	4805.59	673.675	2277.71	570.086	4488.84	0.160351	6.2363	0.794927
P56135|ATPK_MOUSE	ATP synthase subunit f, mitochondrial OS=Mus musculus OX=10090 GN=Atp5mf PE=1 SV=3"	6.76688	0.000508608	-3.29362	152555	24441.7	153580	23735.7	36957.4	8239.54	128113	0.160216	6.24158	0.795295
O08795|GLU2B_MOUSE	Glucosidase 2 subunit beta OS=Mus musculus OX=10090 GN=Prkcsh PE=1 SV=1	14.3412	7.1943e-06	-5.14301	33847.7	5422.91	34324.8	4849.34	2720.04	2883.59	28424.7	0.160215	6.2416	0.795296
Q99PG0|AAAD_MOUSE	Arylacetamide deacetylase OS=Mus musculus OX=10090 GN=Aadac PE=1 SV=3	5.70794	0.00125117	-2.90269	67792.6	10846.7	67087.6	9275.4	18800.1	6685	56945.9	0.159998	6.25009	0.795886
P12791|CP2BA_MOUSE	Cytochrome P450 2B10 OS=Mus musculus OX=10090 GN=Cyp2b10 PE=1 SV=1	3.46456	0.0133924	-1.87314	8618.48	1373.58	8512.46	1158.87	4145.71	551.913	7244.9	0.159376	6.27445	0.797576
Q63880|EST3A_MOUSE	Carboxylesterase 3A OS=Mus musculus OX=10090 GN=Ces3a PE=1 SV=2	6.25171	0.000776614	-3.10979	276822	43727.6	245185	42956.6	72195.2	18668.9	233095	0.157963	6.33061	0.801445
Q3TLP5|ECHD2_MOUSE	Enoyl-CoA hydratase domain-containing protein 2, mitochondrial OS=Mus musculus OX=10090 GN=Echdc2 PE=1 SV=2"	4.742	0.00318487	-2.49691	7744.74	1222.77	6888.22	1294.69	2704.31	503.214	6521.97	0.157883	6.33379	0.801663
O09159|MA2B1_MOUSE	Lysosomal alpha-mannosidase OS=Mus musculus OX=10090 GN=Man2b1 PE=1 SV=4	2.42913	0.0512232	-1.29053	20532.1	3226.81	14983.4	3072.37	14188.2	1305.67	17305.3	0.157159	6.36297	0.80366
Q9CQS8|SC61B_MOUSE	Protein transport protein Sec61 subunit beta OS=Mus musculus OX=10090 GN=Sec61b PE=1 SV=3	12.2017	1.84382e-05	-4.73428	23973.4	3757.25	23797.1	3158.13	2894.34	1613.44	20216.2	0.156725	6.38059	0.804861
P14094|AT1B1_MOUSE	Sodium_potassium-transporting ATPase subunit beta-1 OS=Mus musculus OX=10090 GN=Atp1b1 PE=1 SV=1	3.1199	0.0205876	-1.68639	21620.2	3364.33	17627	2533.27	11511.5	2107.58	18255.9	0.15561	6.42631	0.807962
P35486|ODPA_MOUSE	Pyruvate dehydrogenase E1 component subunit alpha, somatic form, mitochondrial OS=Mus musculus OX=10090 GN=Pdha1 PE=1 SV=1"	5.81345	0.00113765	-2.94399	48982.8	7595.4	46552.9	7182.09	13426.3	4740.31	41387.4	0.155062	6.44902	0.809493
Q8BGS7|CEPT1_MOUSE	Choline_ethanolaminephosphotransferase 1 OS=Mus musculus OX=10090 GN=Cept1 PE=1 SV=1	4.28211	0.00519355	-2.28454	9956.09	1542.94	8608.78	1653.43	3886.05	582.277	8413.15	0.154975	6.45267	0.809739
P16332|MUTA_MOUSE	Methylmalonyl-CoA mutase, mitochondrial OS=Mus musculus OX=10090 GN=Mmut PE=1 SV=2"	8.17754	0.000180097	-3.74449	16462.6	2519.44	17288.8	2307.8	2741.02	2028.73	13943.2	0.15304	6.53424	0.815195
Q91W90|TXND5_MOUSE	Thioredoxin domain-containing protein 5 OS=Mus musculus OX=10090 GN=Txndc5 PE=1 SV=2	8.81034	0.000118683	-3.92561	18229.6	2781.2	19261	1991.18	2974.65	1857.31	15448.4	0.152565	6.55456	0.816544
P10852|4F2_MOUSE	4F2 cell-surface antigen heavy chain OS=Mus musculus OX=10090 GN=Slc3a2 PE=1 SV=1	6.50404	0.000629131	-3.20126	3219.38	487.608	3297.7	474.499	832.404	112.883	2731.77	0.15146	6.60239	0.819701
O08705|NTCP_MOUSE	Sodium_bile acid cotransporter OS=Mus musculus OX=10090 GN=Slc10a1 PE=1 SV=1	4.26953	0.00526581	-2.27853	8015.54	1208.56	7187.6	712.164	2786.12	1550.78	6806.98	0.150777	6.63232	0.821665
Q9CQH3|NDUB5_MOUSE	NADH dehydrogenase [ubiquinone] 1 beta subcomplex subunit 5, mitochondrial OS=Mus musculus OX=10090 GN=Ndufb5 PE=1 SV=1"	6.47586	0.0006439	-3.19118	11122.8	1674.29	10389.1	1461.96	2747.22	983.831	9448.5	0.150528	6.6433	0.822384
Q9JKR6|HYOU1_MOUSE	Hypoxia up-regulated protein 1 OS=Mus musculus OX=10090 GN=Hyou1 PE=1 SV=1	9.78672	6.54878e-05	-4.18384	27913.7	4180.99	25985	4766.24	4384.57	2073.12	23732.7	0.149783	6.67634	0.824538
Q9CPQ1|COX6C_MOUSE	Cytochrome c oxidase subunit 6C OS=Mus musculus OX=10090 GN=Cox6c PE=1 SV=3	8.55167	0.000140286	-3.85298	96877.5	14505.1	98075.3	13262.7	17951.3	6991.29	82372.5	0.149726	6.67888	0.824704
Q91YP0|L2HDH_MOUSE	L-2-hydroxyglutarate dehydrogenase, mitochondrial OS=Mus musculus OX=10090 GN=L2hgdh PE=1 SV=1"	1.58856	0.163259	-0.787123	1387.06	207.581	853.067	167.516	1464.03	248.462	1179.48	0.149655	6.68203	0.824908
Q8BSE0|RMD2_MOUSE	Regulator of microtubule dynamics protein 2 OS=Mus musculus OX=10090 GN=Rmdn2 PE=1 SV=1	8.08914	0.000191321	-3.71824	2227.32	332.855	2145.74	251.2	309.696	351.402	1894.46	0.149442	6.69155	0.825527
Q9CQQ7|AT5F1_MOUSE	ATP synthase F(0) complex subunit B1, mitochondrial OS=Mus musculus OX=10090 GN=Atp5pb PE=1 SV=1"	5.15331	0.00210844	-2.67604	105982	15823.9	100860	12688.3	33150.3	11197.2	90157.8	0.149308	6.69755	0.825916
Q9D6J6|NDUV2_MOUSE	NADH dehydrogenase [ubiquinone] flavoprotein 2, mitochondrial OS=Mus musculus OX=10090 GN=Ndufv2 PE=1 SV=2"	3.44337	0.0137441	-1.86188	5065.79	749.097	3955.59	641.852	2481.96	355.233	4316.7	0.147874	6.76253	0.830109
O08756|HCD2_MOUSE	3-hydroxyacyl-CoA dehydrogenase type-2 OS=Mus musculus OX=10090 GN=Hsd17b10 PE=1 SV=4	5.72175	0.00123559	-2.90812	83622.8	12310.3	84907.4	13333.5	24732	3109.85	71312.4	0.147213	6.79289	0.832055
P50427|STS_MOUSE	Steryl-sulfatase OS=Mus musculus OX=10090 GN=Sts PE=1 SV=1	3.68711	0.0102439	-1.98954	8114.32	1183.11	6887.01	1157.38	3742.74	356.785	6931.21	0.145805	6.85849	0.836228
Q8BHN3|GANAB_MOUSE	Neutral alpha-glucosidase AB OS=Mus musculus OX=10090 GN=Ganab PE=1 SV=1	7.21094	0.000360318	-3.44331	72031.5	10497.5	65824.6	9645.35	15292.8	7576.81	61534	0.145735	6.86176	0.836436
Q921I1|TRFE_MOUSE	Serotransferrin OS=Mus musculus OX=10090 GN=Tf PE=1 SV=1	4.98244	0.00249565	-2.60282	84923.2	12212.8	71461.8	11404.3	28904.1	4051.76	72710.4	0.14381	6.95363	0.842211
Q9Z2I9|SUCB1_MOUSE	Succinate--CoA ligase [ADP-forming] subunit beta, mitochondrial OS=Mus musculus OX=10090 GN=Sucla2 PE=1 SV=2"	4.88942	0.00274	-2.56225	50964	7315.99	54965.9	6129.06	17084	5187.13	43648	0.143552	6.96612	0.842991
Q8CGK3|LONM_MOUSE	Lon protease homolog, mitochondrial OS=Mus musculus OX=10090 GN=Lonp1 PE=1 SV=2"	4.64144	0.00353515	-2.45159	17606.5	2496.89	17407.2	2253.65	6456.62	837.566	15109.6	0.141817	7.05135	0.848272
Q99MR8|MCCA_MOUSE	Methylcrotonoyl-CoA carboxylase subunit alpha, mitochondrial OS=Mus musculus OX=10090 GN=Mccc1 PE=1 SV=2"	5.798	0.00115351	-2.93798	17031.6	2403.22	16298.2	2276.78	4982.47	798.146	14628.3	0.141104	7.08697	0.85046
Q6TCG2|PAQR9_MOUSE	Membrane progesterone receptor epsilon OS=Mus musculus OX=10090 GN=Paqr9 PE=1 SV=2	3.34724	0.0154722	-1.81045	1805.63	254.427	1675.14	258.195	924.494	66.0884	1551.2	0.140908	7.09685	0.851065
P61161|ARP2_MOUSE	Actin-related protein 2 OS=Mus musculus OX=10090 GN=Actr2 PE=1 SV=1	6.56671	0.000597663	-3.22354	1570.37	220.94	1640.11	241.395	354.031	208.746	1349.43	0.140693	7.10765	0.851726
Q9D7B6|ACAD8_MOUSE	Isobutyryl-CoA dehydrogenase, mitochondrial OS=Mus musculus OX=10090 GN=Acad8 PE=1 SV=2"	4.12852	0.00615718	-2.21062	13541.4	1903.86	12552	1231.37	5391.87	1646.48	11637.6	0.140595	7.11262	0.852029
O88986|KBL_MOUSE	2-amino-3-ketobutyrate coenzyme A ligase, mitochondrial OS=Mus musculus OX=10090 GN=Gcat PE=1 SV=2"	2.77629	0.032154	-1.49276	9097.92	1266.76	7929.07	1342.21	5580.94	824.089	7831.16	0.139236	7.18205	0.856248
Q91VD9|NDUS1_MOUSE	NADH-ubiquinone oxidoreductase 75 kDa subunit, mitochondrial OS=Mus musculus OX=10090 GN=Ndufs1 PE=1 SV=2"	4.16324	0.00592299	-2.22746	40250.7	5596.75	38196.8	5650.32	16453.4	2535.1	34653.9	0.139047	7.1918	0.856837
Q8CG76|ARK72_MOUSE	Aflatoxin B1 aldehyde reductase member 2 OS=Mus musculus OX=10090 GN=Akr7a2 PE=1 SV=3	2.05159	0.0860522	-1.06524	2435.14	335.721	2500.24	300.284	2023.37	307.619	2099.42	0.137866	7.25344	0.860544
P09103|PDIA1_MOUSE	Protein disulfide-isomerase OS=Mus musculus OX=10090 GN=P4hb PE=1 SV=2	7.00659	0.000421325	-3.37538	250602	34516.5	236785	31806.3	58238.6	20317	216086	0.137734	7.26036	0.860958
P48771|CX7A2_MOUSE	Cytochrome c oxidase subunit 7A2, mitochondrial OS=Mus musculus OX=10090 GN=Cox7a2 PE=1 SV=2"	4.56195	0.003843	-2.41533	3766.27	516.663	3872.7	531.335	1385.2	332.964	3249.61	0.137182	7.28961	0.862704
Q9CQN1|TRAP1_MOUSE	Heat shock protein 75 kDa, mitochondrial OS=Mus musculus OX=10090 GN=Trap1 PE=1 SV=1"	3.42477	0.0140612	-1.85198	27724.8	3802.85	28538.3	3906.72	13915.5	1232.1	23922	0.137164	7.29053	0.862759
Q8BK48|EST2E_MOUSE	Pyrethroid hydrolase Ces2e OS=Mus musculus OX=10090 GN=Ces2e PE=1 SV=1	3.84496	0.00850964	-2.07009	22530.4	3082.98	23659.9	2380.55	9883	2157.74	19447.5	0.136836	7.30801	0.863799
Q9D0S9|HINT2_MOUSE	Histidine triad nucleotide-binding protein 2, mitochondrial OS=Mus musculus OX=10090 GN=Hint2 PE=1 SV=1"	4.89727	0.00271838	-2.56569	19607.6	2669.7	20231	1686.06	6552.3	2217.21	16937.9	0.136157	7.34448	0.865961
Q8BFR4|GNS_MOUSE	N-acetylglucosamine-6-sulfatase OS=Mus musculus OX=10090 GN=Gns PE=1 SV=1	2.23359	0.0669349	-1.17435	7190.59	973.294	7084.41	997.131	5540.7	541.426	6217.29	0.135357	7.38788	0.86852
O08601|MTP_MOUSE	Microsomal triglyceride transfer protein large subunit OS=Mus musculus OX=10090 GN=Mttp PE=1 SV=2	4.47843	0.00419943	-2.37681	64980	8606.7	56240.7	7357.11	24475.6	5894.9	56373.3	0.132452	7.54993	0.877943
P53395|ODB2_MOUSE	Lipoamide acyltransferase component of branched-chain alpha-keto acid dehydrogenase complex, mitochondrial OS=Mus musculus OX=10090 GN=Dbt PE=1 SV=2"	2.34309	0.0575998	-1.23958	19262	2538.69	14832.7	2586.49	14209.6	1359.35	16723.3	0.131798	7.58735	0.88009
P57716|NICA_MOUSE	Nicastrin OS=Mus musculus OX=10090 GN=Ncstn PE=1 SV=3	2.46183	0.0489977	-1.30982	2360.84	310.945	1737.97	295.068	1658.68	148.81	2049.89	0.13171	7.59245	0.880382
Q8CAQ8|MIC60_MOUSE	MICOS complex subunit Mic60 OS=Mus musculus OX=10090 GN=Immt PE=1 SV=1	10.6335	4.07638e-05	-4.38973	53718.3	6989.92	53762.6	7319.69	8467.3	2355.86	46728.3	0.130122	7.6851	0.88565
Q9Z2I8|SUCB2_MOUSE	Succinate--CoA ligase [GDP-forming] subunit beta, mitochondrial OS=Mus musculus OX=10090 GN=Suclg2 PE=1 SV=3"	3.56916	0.0117961	-1.92826	35955.6	4675.21	38491.3	4911.78	17384.7	2238.22	31280.4	0.130027	7.6907	0.885966
Q8VCU1|EST3B_MOUSE	Carboxylesterase 3B OS=Mus musculus OX=10090 GN=Ces3b PE=1 SV=2	5.09928	0.00222297	-2.65307	57870.7	7521.74	52694.2	7576.76	19538.4	2866.12	50349	0.129975	7.6938	0.886141
Q91WU0|EST1F_MOUSE	Carboxylesterase 1F OS=Mus musculus OX=10090 GN=Ces1f PE=1 SV=1	5.44087	0.00160105	-2.79559	105990	13691.7	95737.5	13057	32608.3	9369.36	92298	0.129179	7.74117	0.888807
Q9DBG1|CP27A_MOUSE	Sterol 26-hydroxylase, mitochondrial OS=Mus musculus OX=10090 GN=Cyp27a1 PE=1 SV=1"	6.73231	0.00052284	-3.28163	52074.9	6718.44	48123.9	5509.71	12683.7	4547.54	45356.5	0.129015	7.75104	0.88936
Q9D6M3|GHC1_MOUSE	Mitochondrial glutamate carrier 1 OS=Mus musculus OX=10090 GN=Slc25a22 PE=1 SV=1	6.51047	0.000625818	-3.20355	45206.8	5825.25	44103.7	5500.32	11874.5	2314.51	39381.6	0.128858	7.7605	0.88989
Q9QXX4|CMC2_MOUSE	Calcium-binding mitochondrial carrier protein Aralar2 OS=Mus musculus OX=10090 GN=Slc25a13 PE=1 SV=1	3.63552	0.0108931	-1.96285	88548.3	11409.2	73203.4	10357.1	41876.5	6870.78	77139.1	0.128847	7.76114	0.889926
Q9CR68|UCRI_MOUSE	Cytochrome b-c1 complex subunit Rieske, mitochondrial OS=Mus musculus OX=10090 GN=Uqcrfs1 PE=1 SV=1"	3.85265	0.00843393	-2.07397	52239.2	6693.5	62477	6039.27	23567.2	1901.13	45545.7	0.128132	7.80446	0.892343
Q60597|ODO1_MOUSE	2-oxoglutarate dehydrogenase, mitochondrial OS=Mus musculus OX=10090 GN=Ogdh PE=1 SV=3"	7.29892	0.000337228	-3.47208	24617.8	3153.77	25328.8	3279.55	5612.87	1756.95	21464	0.12811	7.80582	0.892419
Q8VCZ9|HYPDH_MOUSE	Hydroxyproline dehydrogenase OS=Mus musculus OX=10090 GN=Prodh2 PE=1 SV=1	3.0393	0.0228235	-1.64162	8438.19	1077.48	7141.34	1137.68	4833.93	307.467	7360.71	0.127691	7.83141	0.89384
Q8VEK0|CC50A_MOUSE	Cell cycle control protein 50A OS=Mus musculus OX=10090 GN=Tmem30a PE=1 SV=1	5.23663	0.00194469	-2.71115	14319.8	1826.32	13497.7	978.387	4283.05	2103.19	12493.5	0.127538	7.84081	0.894361
P67778|PHB_MOUSE	Prohibitin OS=Mus musculus OX=10090 GN=Phb PE=1 SV=1	6.97562	0.000431572	-3.36495	182072	23156.2	175750	20462.2	41597.6	18591.8	158916	0.127181	7.86278	0.895576
Q9CQ69|QCR8_MOUSE	Cytochrome b-c1 complex subunit 8 OS=Mus musculus OX=10090 GN=Uqcrq PE=1 SV=3	5.829	0.00112193	-2.95003	51653.6	6539.89	52522	5656.32	14855.7	4348.33	45113.7	0.126611	7.89823	0.89753
Q9DCM0|ETHE1_MOUSE	Persulfide dioxygenase ETHE1, mitochondrial OS=Mus musculus OX=10090 GN=Ethe1 PE=1 SV=2"	7.63472	0.000263459	-3.57929	17254	2177.68	17287.7	1921.72	3623.71	1570.51	15076.3	0.126213	7.9231	0.898895
Q8BWQ1|UD2A3_MOUSE	UDP-glucuronosyltransferase 2A3 OS=Mus musculus OX=10090 GN=Ugt2a3 PE=1 SV=1	5.5342	0.00146744	-2.83344	169750	21403.8	150145	19132.3	52489	10909.4	148346	0.12609	7.93083	0.899318
Q9D051|ODPB_MOUSE	Pyruvate dehydrogenase E1 component subunit beta, mitochondrial OS=Mus musculus OX=10090 GN=Pdhb PE=1 SV=1"	4.63962	0.00354189	-2.45076	10875.5	1345.01	10208.7	1288.72	4101.75	232.212	9530.51	0.123673	8.08584	0.907725
Q9CY50|SSRA_MOUSE	Translocon-associated protein subunit alpha OS=Mus musculus OX=10090 GN=Ssr1 PE=1 SV=1	4.59395	0.00371559	-2.42997	39885.5	4915.75	34746.7	3888.21	15012	2533.67	34969.8	0.123246	8.11382	0.909226
Q91XE0|GLYAT_MOUSE	Glycine N-acyltransferase OS=Mus musculus OX=10090 GN=Glyat PE=1 SV=1	4.89332	0.00272923	-2.56396	29380.9	3613.45	25527.2	2926.32	10321.2	2094.8	25767.4	0.122986	8.13097	0.910143
P08113|ENPL_MOUSE	Endoplasmin OS=Mus musculus OX=10090 GN=Hsp90b1 PE=1 SV=2	7.22582	0.000356287	-3.4482	511862	62879.6	466725	60026.2	119075	35559.8	448983	0.122845	8.14036	0.910643
Q3UEG6|AGT2_MOUSE	Alanine--glyoxylate aminotransferase 2, mitochondrial OS=Mus musculus OX=10090 GN=Agxt2 PE=1 SV=1"	5.47029	0.00155749	-2.80757	25347.5	3095.53	25681.2	2734.99	8027.88	1319.41	22252	0.122123	8.18844	0.913201
Q8VCT4|EST1D_MOUSE	Carboxylesterase 1D OS=Mus musculus OX=10090 GN=Ces1d PE=1 SV=1	5.64777	0.00132166	-2.87888	624820	76220.6	569515	74240.2	188878	45459.3	548599	0.121988	8.19752	0.913682
Q8QZR3|EST2A_MOUSE	Pyrethroid hydrolase Ces2a OS=Mus musculus OX=10090 GN=Ces2a PE=1 SV=1	6.8852	0.000463169	-3.33426	170062	20727.7	150125	20066.2	42035.2	10711.5	149335	0.121883	8.2046	0.914057
Q9CYW4|HDHD3_MOUSE	Haloacid dehalogenase-like hydrolase domain-containing protein 3 OS=Mus musculus OX=10090 GN=Hdhd3 PE=1 SV=1	3.79144	0.00905815	-2.04296	12695.3	1530.51	13014	1587.91	5775.77	1151.65	11164.8	0.120557	8.2948	0.918806
Q9WV54|ASAH1_MOUSE	Acid ceramidase OS=Mus musculus OX=10090 GN=Asah1 PE=1 SV=1	2.32982	0.058655	-1.2317	6182.51	738.933	5306.24	714.624	4671.92	98.2174	5443.58	0.11952	8.36682	0.92256
Q9CRC0|VKOR1_MOUSE	Vitamin K epoxide reductase complex subunit 1 OS=Mus musculus OX=10090 GN=Vkorc1 PE=1 SV=1	10.5642	4.23205e-05	-4.37345	7149.67	848.024	7081.83	578.998	646.428	1002.71	6301.65	0.11861	8.43097	0.925878
Q9WU79|PROD_MOUSE	Proline dehydrogenase 1, mitochondrial OS=Mus musculus OX=10090 GN=Prodh PE=1 SV=2"	4.90075	0.00270885	-2.56722	31489.6	3731.45	29003	3714.85	11286.4	971.487	27758.1	0.118498	8.43895	0.926288
O88455|DHCR7_MOUSE	7-dehydrocholesterol reductase OS=Mus musculus OX=10090 GN=Dhcr7 PE=1 SV=1	8.04322	0.00019747	-3.7045	28954.6	3426.43	28351.4	2031.84	5312.34	3474.63	25528.2	0.118338	8.45039	0.926877
Q8K2B3|SDHA_MOUSE	Succinate dehydrogenase [ubiquinone] flavoprotein subunit, mitochondrial OS=Mus musculus OX=10090 GN=Sdha PE=1 SV=1"	7.64464	0.00026158	-3.58239	81997	9666.39	79141.4	8227.73	16648.7	8994.85	72330.6	0.117887	8.4827	0.928534
Q8C5H8|NAKD2_MOUSE	NAD kinase 2, mitochondrial OS=Mus musculus OX=10090 GN=Nadk2 PE=1 SV=2"	9.18565	9.38127e-05	-4.02774	10019.2	1176.47	10736.6	1152.64	1919.44	150.712	8842.77	0.117421	8.51638	0.930255
P97807|FUMH_MOUSE	Fumarate hydratase, mitochondrial OS=Mus musculus OX=10090 GN=Fh PE=1 SV=3"	4.29993	0.00509317	-2.29301	41740.8	4889.52	41922.6	5014	17097	1218.35	36851.3	0.11714	8.53679	0.931295
Q8BFR5|EFTU_MOUSE	Elongation factor Tu, mitochondrial OS=Mus musculus OX=10090 GN=Tufm PE=1 SV=1"	5.36584	0.00171856	-2.76483	50095.1	5856.21	51266.4	5817.38	16209.4	3023.93	44238.9	0.116902	8.55418	0.932178
P20060|HEXB_MOUSE	Beta-hexosaminidase subunit beta OS=Mus musculus OX=10090 GN=Hexb PE=1 SV=2	2.81278	0.030644	-1.51365	61844.6	7142.48	53190.9	5938.89	38751.3	3344.87	54702.1	0.115491	8.6587	0.937453
P50544|ACADV_MOUSE	Very long-chain specific acyl-CoA dehydrogenase, mitochondrial OS=Mus musculus OX=10090 GN=Acadvl PE=1 SV=3"	4.73657	0.00320273	-2.49448	67583.7	7796.18	64802.3	7071.1	25135	2355	59787.6	0.115356	8.66883	0.93796
P21614|VTDB_MOUSE	Vitamin D-binding protein OS=Mus musculus OX=10090 GN=Gc PE=1 SV=2	5.27317	0.0018775	-2.72642	29459.1	3393.44	28022.9	3478.43	9832.81	1025.64	26065.7	0.115192	8.68119	0.938579
P20108|PRDX3_MOUSE	Thioredoxin-dependent peroxide reductase, mitochondrial OS=Mus musculus OX=10090 GN=Prdx3 PE=1 SV=1"	4.08448	0.00646932	-2.18914	87211.9	10032.6	83550.3	8042.65	37078.5	7306.19	77179.3	0.115037	8.69287	0.939163
Q80WJ7|LYRIC_MOUSE	Protein LYRIC OS=Mus musculus OX=10090 GN=Mtdh PE=1 SV=1	2.4032	0.0530629	-1.27521	9265.03	1058.81	10005.3	1100.18	6822.87	298.829	8206.22	0.11428	8.75043	0.94203
Q9WTP7|KAD3_MOUSE	GTP:AMP phosphotransferase AK3, mitochondrial OS=Mus musculus OX=10090 GN=Ak3 PE=1 SV=3"	5.23031	0.00195661	-2.7085	34274.7	3871.69	34661.1	3974.61	11601.6	747.603	30403	0.112961	8.85263	0.947072
Q8BL86|MBLC2_MOUSE	Metallo-beta-lactamase domain-containing protein 2 OS=Mus musculus OX=10090 GN=Mblac2 PE=1 SV=2	4.62266	0.00360531	-2.44306	20299	2285.24	17803.2	1748.06	7526.86	2021.86	18013.8	0.112579	8.88265	0.948542
Q9CR62|M2OM_MOUSE	Mitochondrial 2-oxoglutarate_malate carrier protein OS=Mus musculus OX=10090 GN=Slc25a11 PE=1 SV=3	4.44065	0.00437278	-2.35924	24718.9	2780.27	23898.7	2251.62	9749.92	1602.93	21938.6	0.112476	8.89082	0.948942
O54734|OST48_MOUSE	Dolichyl-diphosphooligosaccharide--protein glycosyltransferase 48 kDa subunit OS=Mus musculus OX=10090 GN=Ddost PE=1 SV=2	5.97578	0.000985217	-3.00647	187415	21035	171605	18479.3	54380.9	11979.7	166380	0.112237	8.90969	0.949862
P00405|COX2_MOUSE	Cytochrome c oxidase subunit 2 OS=Mus musculus OX=10090 GN=Mtco2 PE=1 SV=1	5.37746	0.00169974	-2.76962	73883.1	8290.61	72026.2	8595.23	23744.5	5597.57	65592.5	0.112213	8.91166	0.949959
Q61207|SAP_MOUSE	Prosaposin OS=Mus musculus OX=10090 GN=Psap PE=1 SV=2	2.97547	0.0247814	-1.60587	6131.08	687.903	6481.85	833.616	3627.74	474.94	5443.17	0.112199	8.9127	0.95001
Q9D7J9|ECHD3_MOUSE	Enoyl-CoA hydratase domain-containing protein 3, mitochondrial OS=Mus musculus OX=10090 GN=Echdc3 PE=1 SV=1"	8.55749	0.000139753	-3.85464	28484.7	3184.4	29855.9	3249.89	5763.51	1321.29	25300.3	0.111793	8.94509	0.951584
Q9D855|QCR7_MOUSE	Cytochrome b-c1 complex subunit 7 OS=Mus musculus OX=10090 GN=Uqcrb PE=1 SV=3	4.41579	0.00449127	-2.34763	5119.02	559.02	4839.91	483.888	2036.77	342.234	4560	0.109204	9.15714	0.96176
Q91ZA3|PCCA_MOUSE	Propionyl-CoA carboxylase alpha chain, mitochondrial OS=Mus musculus OX=10090 GN=Pcca PE=1 SV=2"	5.24599	0.00192722	-2.71507	8093.98	882.686	8113.56	696.847	2649.3	734.588	7211.29	0.109055	9.16972	0.962356
Q921X9|PDIA5_MOUSE	Protein disulfide-isomerase A5 OS=Mus musculus OX=10090 GN=Pdia5 PE=1 SV=1	6.15299	0.00084482	-3.07324	24417.2	2658.94	24550.7	2647.35	7069.73	194.698	21758.3	0.108896	9.18306	0.962988
Q9DBG6|RPN2_MOUSE	Dolichyl-diphosphooligosaccharide--protein glycosyltransferase subunit 2 OS=Mus musculus OX=10090 GN=Rpn2 PE=1 SV=1	8.11266	0.000188258	-3.72525	48348.1	5249.84	47793.4	5149.4	9963.38	3690.56	43098.2	0.108584	9.20943	0.964233
Q8BMS1|ECHA_MOUSE	Trifunctional enzyme subunit alpha, mitochondrial OS=Mus musculus OX=10090 GN=Hadha PE=1 SV=1"	5.60755	0.00137131	-2.86286	156168	16904.5	146490	17919.7	49338.5	5727.6	139263	0.108246	9.23822	0.965588
Q99JY0|ECHB_MOUSE	Trifunctional enzyme subunit beta, mitochondrial OS=Mus musculus OX=10090 GN=Hadhb PE=1 SV=1"	3.98897	0.00720909	-2.14212	59747	6443.65	48435.8	5965.49	26439.6	3898.08	53303.3	0.107849	9.27223	0.967184
Q9QWR8|NAGAB_MOUSE	Alpha-N-acetylgalactosaminidase OS=Mus musculus OX=10090 GN=Naga PE=1 SV=2	3.34413	0.015532	-1.80877	8050.7	864.828	7088.14	958.344	4274.48	445.143	7185.87	0.107423	9.30901	0.968903
Q80XN0|BDH_MOUSE	D-beta-hydroxybutyrate dehydrogenase, mitochondrial OS=Mus musculus OX=10090 GN=Bdh1 PE=1 SV=2"	4.19016	0.00574825	-2.24046	131116	13916.3	122575	13484	55669.9	5493.64	117199	0.106138	9.42173	0.97413
Q9Z2Z6|MCAT_MOUSE	Mitochondrial carnitine_acylcarnitine carrier protein OS=Mus musculus OX=10090 GN=Slc25a20 PE=1 SV=1	3.92629	0.00774576	-2.11094	48724.5	5166.63	42744.3	5231.73	22048.3	2484.31	43557.8	0.106038	9.43062	0.97454
P50429|ARSB_MOUSE	Arylsulfatase B OS=Mus musculus OX=10090 GN=Arsb PE=1 SV=3	2.79739	0.0312714	-1.50485	6520.25	689.311	5271.93	809.432	4135.87	523.326	5830.94	0.105718	9.45908	0.975849
Q922Q8|LRC59_MOUSE	Leucine-rich repeat-containing protein 59 OS=Mus musculus OX=10090 GN=Lrrc59 PE=1 SV=1	9.45141	7.98278e-05	-4.09785	94420.4	9967.19	90688.9	8357.16	16843.8	5971.69	84453.2	0.105562	9.47311	0.976493
O35114|SCRB2_MOUSE	Lysosome membrane protein 2 OS=Mus musculus OX=10090 GN=Scarb2 PE=1 SV=3	2.15472	0.0746185	-1.12715	27365.2	2860.13	17880.7	2703.16	22688.7	1606.81	24505.1	0.104517	9.56782	0.980813
P54071|IDHP_MOUSE	Isocitrate dehydrogenase [NADP], mitochondrial OS=Mus musculus OX=10090 GN=Idh2 PE=1 SV=3"	4.47061	0.00423465	-2.37318	82067.6	8532.31	73003.8	7812.11	32690.4	3683.01	73535.3	0.103967	9.61845	0.983105
Q9D172|GAL3A_MOUSE	Glutamine amidotransferase-like class 1 domain-containing protein 3A, mitochondrial OS=Mus musculus OX=10090 GN=Gatd3a PE=1 SV=1"	5.37045	0.00171107	-2.76673	52244.3	5429.99	54129.1	5853.32	17264.3	2426.79	46814.3	0.103935	9.62143	0.98324
Q9DCX2|ATP5H_MOUSE	ATP synthase subunit d, mitochondrial OS=Mus musculus OX=10090 GN=Atp5pd PE=1 SV=3"	6.56679	0.000597625	-3.22357	36492.4	3768.16	38169.6	3882.3	9701.92	2281.64	32724.3	0.103259	9.68442	0.986073
O08749|DLDH_MOUSE	Dihydrolipoyl dehydrogenase, mitochondrial OS=Mus musculus OX=10090 GN=Dld PE=1 SV=2"	5.95559	0.00100284	-2.99877	85493.2	8767.57	79199.6	7078.02	25460.7	3954.05	76725.7	0.102553	9.75107	0.989052
Q9D3D9|ATPD_MOUSE	ATP synthase subunit delta, mitochondrial OS=Mus musculus OX=10090 GN=Atp5f1d PE=1 SV=1"	4.23896	0.00544604	-2.26392	3864.15	393.548	4245.77	243.046	1553.84	516.632	3470.6	0.101846	9.81875	0.992056
P51881|ADT2_MOUSE	ADP_ATP translocase 2 OS=Mus musculus OX=10090 GN=Slc25a5 PE=1 SV=3	5.14384	0.00212802	-2.67202	928282	93756	893860	85116	318565	61652.3	834527	0.100999	9.90105	0.995681
Q9DB20|ATPO_MOUSE	ATP synthase subunit O, mitochondrial OS=Mus musculus OX=10090 GN=Atp5po PE=1 SV=1"	5.88769	0.00106482	-2.97272	146224	14681.7	154120	13199.7	44235	6317.02	131542	0.100406	9.95956	0.99824
Q9EQ20|MMSA_MOUSE	Methylmalonate-semialdehyde dehydrogenase [acylating], mitochondrial OS=Mus musculus OX=10090 GN=Aldh6a1 PE=1 SV=1"	4.68233	0.0033877	-2.47009	157280	15614.7	140255	13887.4	60275.2	5332.21	141665	0.0992795	10.0726	1.00314
Q9D2G2|ODO2_MOUSE	Dihydrolipoyllysine-residue succinyltransferase component of 2-oxoglutarate dehydrogenase complex, mitochondrial OS=Mus musculus OX=10090 GN=Dlst PE=1 SV=1"	5.96445	0.000995062	-3.00215	122730	12094.7	124470	12529.6	36388.4	7222.03	110635	0.0985471	10.1474	1.00636
Q9CZN7|GLYM_MOUSE	Serine hydroxymethyltransferase, mitochondrial OS=Mus musculus OX=10090 GN=Shmt2 PE=1 SV=1"	6.88584	0.000462935	-3.33448	109138	10678	102150	8275.03	27801.1	6703.49	98460.1	0.0978393	10.2208	1.00949
Q9DB77|QCR2_MOUSE	Cytochrome b-c1 complex subunit 2, mitochondrial OS=Mus musculus OX=10090 GN=Uqcrc2 PE=1 SV=1"	4.57403	0.00379433	-2.42086	105837	10250.3	92508.4	9473.18	41619	3833.94	95586.2	0.0968503	10.3252	1.0139
P18242|CATD_MOUSE	Cathepsin D OS=Mus musculus OX=10090 GN=Ctsd PE=1 SV=1	3.02964	0.0231085	-1.63623	157965	15170.1	121835	17180.8	94032.5	6619.57	142795	0.0960347	10.4129	1.01757
P50171|DHB8_MOUSE	Estradiol 17-beta-dehydrogenase 8 OS=Mus musculus OX=10090 GN=Hsd17b8 PE=1 SV=2	10.4246	4.56698e-05	-4.34037	24303.1	2329.71	25575.3	1851.91	4054.42	1154.77	21973.4	0.0958607	10.4318	1.01836
Q05920|PYC_MOUSE	Pyruvate carboxylase, mitochondrial OS=Mus musculus OX=10090 GN=Pc PE=1 SV=1"	6.29128	0.000751061	-3.12432	398678	37285.3	398195	30299.6	112687	22375.3	361392	0.0935225	10.6926	1.02908
Q9D0M3|CY1_MOUSE	Cytochrome c1, heme protein, mitochondrial OS=Mus musculus OX=10090 GN=Cyc1 PE=1 SV=1"	6.66264	0.000552927	-3.25733	115463	10769.9	115130	8518.13	29642.5	10439.2	104693	0.093276	10.7209	1.03023
Q8BJ64|CHDH_MOUSE	Choline dehydrogenase, mitochondrial OS=Mus musculus OX=10090 GN=Chdh PE=1 SV=1"	5.23496	0.00194784	-2.71045	64531.3	6014.67	59028.7	4504.94	21986	4051.11	58516.6	0.0932056	10.729	1.03056
Q91YQ5|RPN1_MOUSE	Dolichyl-diphosphooligosaccharide--protein glycosyltransferase subunit 1 OS=Mus musculus OX=10090 GN=Rpn1 PE=1 SV=1	5.65783	0.00130956	-2.88288	191358	17790.7	164840	14807.8	60717.8	8815.75	173567	0.0929711	10.756	1.03165
P62897|CYC_MOUSE	Cytochrome c, somatic OS=Mus musculus OX=10090 GN=Cycs PE=1 SV=2"	3.76868	0.00930311	-2.03137	8936.43	826.334	7543.89	897.762	4283.82	415.773	8110.1	0.0924679	10.8146	1.03401
Q9DBF1|AL7A1_MOUSE	Alpha-aminoadipic semialdehyde dehydrogenase OS=Mus musculus OX=10090 GN=Aldh7a1 PE=1 SV=4	5.25705	0.00190682	-2.71969	24963.7	2306.74	23897.5	2408.24	8578.03	846.195	22657	0.0924038	10.8221	1.03431
Q91YT0|NDUV1_MOUSE	NADH dehydrogenase [ubiquinone] flavoprotein 1, mitochondrial OS=Mus musculus OX=10090 GN=Ndufv1 PE=1 SV=1"	4.93088	0.00262789	-2.58039	20068.8	1839.09	20526.6	1420.59	7340.62	887.76	18229.7	0.0916392	10.9124	1.03792
Q8R0N6|HOT_MOUSE	Hydroxyacid-oxoacid transhydrogenase, mitochondrial OS=Mus musculus OX=10090 GN=Adhfe1 PE=1 SV=2"	3.11929	0.0206035	-1.68606	5938.1	541.694	6304.45	600.346	3436.22	405.171	5396.41	0.0912234	10.9621	1.03989
Q8VDD5|MYH9_MOUSE	Myosin-9 OS=Mus musculus OX=10090 GN=Myh9 PE=1 SV=4	5.78761	0.00116432	-2.93393	63368.2	5776.34	53953.2	6120.18	19691.6	2884.37	57591.8	0.0911553	10.9703	1.04022
P61804|DAD1_MOUSE	Dolichyl-diphosphooligosaccharide--protein glycosyltransferase subunit DAD1 OS=Mus musculus OX=10090 GN=Dad1 PE=1 SV=3	6.69114	0.000540383	-3.2673	26811.5	2443.43	26245.6	1767.61	7014.91	1960.44	24368.1	0.0911335	10.9729	1.04032
P27046|MA2A1_MOUSE	Alpha-mannosidase 2 OS=Mus musculus OX=10090 GN=Man2a1 PE=1 SV=2	8.88395	0.000113255	-3.94594	18452.5	1669.18	18970.2	1641.47	3732.03	589.768	16783.3	0.0904583	11.0548	1.04355
Q8BWF0|SSDH_MOUSE	Succinate-semialdehyde dehydrogenase, mitochondrial OS=Mus musculus OX=10090 GN=Aldh5a1 PE=1 SV=1"	3.70884	0.00998335	-2.00072	13444	1212.8	15566.1	1252	6553.74	742.937	12231.2	0.0902111	11.0851	1.04474
Q9CZ13|QCR1_MOUSE	Cytochrome b-c1 complex subunit 1, mitochondrial OS=Mus musculus OX=10090 GN=Uqcrc1 PE=1 SV=2"	5.25334	0.00191363	-2.71814	187785	16875.7	167270	11499.5	63714.9	13195.4	170909	0.089867	11.1276	1.0464
Q62425|NDUA4_MOUSE	Cytochrome c oxidase subunit NDUFA4 OS=Mus musculus OX=10090 GN=Ndufa4 PE=1 SV=2	4.20571	0.00564991	-2.24796	29041.7	2604.24	27604.9	2422.78	12468.4	1611.75	26437.5	0.0896724	11.1517	1.04734
P97821|CATC_MOUSE	Dipeptidyl peptidase 1 OS=Mus musculus OX=10090 GN=Ctsc PE=1 SV=1	2.66219	0.0374143	-1.42696	13633.3	1204.44	9942.14	1211.97	9335.79	167.319	12428.8	0.0883457	11.3192	1.05381
Q8VCW8|ACSF2_MOUSE	Medium-chain acyl-CoA ligase ACSF2, mitochondrial OS=Mus musculus OX=10090 GN=Acsf2 PE=1 SV=1"	5.3041	0.00182266	-2.73929	47704.5	4208.43	49688.2	3141.4	15992.1	3639.1	43496.1	0.0882188	11.3355	1.05444
Q60605|MYL6_MOUSE	Myosin light polypeptide 6 OS=Mus musculus OX=10090 GN=Myl6 PE=1 SV=3	18.3404	1.69311e-06	-5.77131	10086.5	842.115	9702	855.173	934.26	378.669	9244.34	0.0834896	11.9775	1.07837
P54869|HMCS2_MOUSE	Hydroxymethylglutaryl-CoA synthase, mitochondrial OS=Mus musculus OX=10090 GN=Hmgcs2 PE=1 SV=2"	4.407	0.00453402	-2.34352	640368	53384	611000	46102.5	265009	27059.5	586983	0.0833647	11.9955	1.07902
P47738|ALDH2_MOUSE	Aldehyde dehydrogenase, mitochondrial OS=Mus musculus OX=10090 GN=Aldh2 PE=1 SV=1"	4.8652	0.00280801	-2.5516	572212	47597.4	547150	47924.8	214698	20351.7	524615	0.0831814	12.0219	1.07997
Q9ET22|DPP2_MOUSE	Dipeptidyl peptidase 2 OS=Mus musculus OX=10090 GN=Dpp7 PE=1 SV=2	2.32212	0.0592767	-1.22712	16050.2	1322.14	10065.4	1507.01	12668.9	639.202	14728.1	0.0823754	12.1395	1.0842
P10605|CATB_MOUSE	Cathepsin B OS=Mus musculus OX=10090 GN=Ctsb PE=1 SV=2	2.33227	0.0584585	-1.23315	29985.4	2469.46	20572.5	2667.63	23585.5	696.67	27515.9	0.0823555	12.1425	1.08431
P26443|DHE3_MOUSE	Glutamate dehydrogenase 1, mitochondrial OS=Mus musculus OX=10090 GN=Glud1 PE=1 SV=1"	5.59101	0.00139234	-2.85625	467322	37944.2	427325	39121.4	153024	13244.9	429378	0.0811949	12.316	1.09047
Q921L3|TMCO1_MOUSE	Calcium load-activated calcium channel OS=Mus musculus OX=10090 GN=Tmco1 PE=1 SV=1	11.456	2.65528e-05	-4.57589	2183.98	176.214	2221.89	168.65	285.145	203.849	2007.76	0.0806848	12.3939	1.09321
Q9WUM5|SUCA_MOUSE	Succinate--CoA ligase [ADP_GDP-forming] subunit alpha, mitochondrial OS=Mus musculus OX=10090 GN=Suclg1 PE=1 SV=4"	6.86092	0.0004721	-3.32597	107164	8617.43	109032	8322.94	28447.3	3997.95	98546.4	0.0804136	12.4357	1.09467
Q9WVM8|AADAT_MOUSE	Kynurenine_alpha-aminoadipate aminotransferase, mitochondrial OS=Mus musculus OX=10090 GN=Aadat PE=1 SV=1"	3.00396	0.023886	-1.62186	22711.9	1819.69	23806.8	1809.59	13901.4	484.022	20892.2	0.0801206	12.4812	1.09626
Q9WTP6|KAD2_MOUSE	Adenylate kinase 2, mitochondrial OS=Mus musculus OX=10090 GN=Ak2 PE=1 SV=5"	4.19227	0.00573476	-2.24148	84648.1	6760.14	93785	4209.79	36692.6	5861.8	77887.9	0.0798617	12.5217	1.09766
Q8C196|CPSM_MOUSE	Carbamoyl-phosphate synthase [ammonia], mitochondrial OS=Mus musculus OX=10090 GN=Cps1 PE=1 SV=2"	4.99155	0.00247308	-2.60676	6506800	514795	5949350	522380	2.39106e+06	216706	5992005	0.0791165	12.6396	1.10173
Q91WG0|EST2C_MOUSE	Acylcarnitine hydrolase OS=Mus musculus OX=10090 GN=Ces2c PE=1 SV=1	2.33187	0.0584906	-1.23291	7887.81	617.806	8834.13	401.659	6207.1	592.662	7270.01	0.0783241	12.7675	1.1061
Q9CZU6|CISY_MOUSE	Citrate synthase, mitochondrial OS=Mus musculus OX=10090 GN=Cs PE=1 SV=1"	4.86283	0.00281475	-2.55056	113029	8834.26	107791	9502.45	42789.4	2343.95	104195	0.0781593	12.7944	1.10702
Q8BMF4|ODP2_MOUSE	Dihydrolipoyllysine-residue acetyltransferase component of pyruvate dehydrogenase complex, mitochondrial OS=Mus musculus OX=10090 GN=Dlat PE=1 SV=2"	6.2402	0.000784235	-3.10555	48976.7	3813.14	45980.9	4086.84	14398.9	1482.99	45163.6	0.0778562	12.8442	1.10871
Q9WUR9|KAD4_MOUSE	Adenylate kinase 4, mitochondrial OS=Mus musculus OX=10090 GN=Ak4 PE=1 SV=1"	2.22364	0.0678571	-1.1684	2074.86	160.706	2065.8	207.882	1718.28	107.528	1914.15	0.0774541	12.9109	1.11096
O35604|NPC1_MOUSE	NPC intracellular cholesterol transporter 1 OS=Mus musculus OX=10090 GN=Npc1 PE=1 SV=2	3.01858	0.02344	-1.63004	21614.5	1670.76	17820.3	1591.69	13209.8	331.697	19943.8	0.0772982	12.9369	1.11183
Q07417|ACADS_MOUSE	Short-chain specific acyl-CoA dehydrogenase, mitochondrial OS=Mus musculus OX=10090 GN=Acads PE=1 SV=2"	6.77766	0.000504265	-3.29734	34618.1	2640.55	31591.4	2685.85	9426.04	437.097	31977.5	0.0762765	13.1102	1.11761
P61922|GABT_MOUSE	4-aminobutyrate aminotransferase, mitochondrial OS=Mus musculus OX=10090 GN=Abat PE=1 SV=1"	4.00814	0.00705332	-2.15161	15407.7	1170.43	13210.8	1167.41	7082	560.662	14237.2	0.0759639	13.1642	1.11939
Q8K297|GT251_MOUSE	Procollagen galactosyltransferase 1 OS=Mus musculus OX=10090 GN=Colgalt1 PE=1 SV=2	6.80213	0.000494556	-3.30578	2692.86	203.51	2465.6	129.989	682.707	263.885	2489.35	0.0755738	13.2321	1.12163
Q8R086|SUOX_MOUSE	Sulfite oxidase, mitochondrial OS=Mus musculus OX=10090 GN=Suox PE=1 SV=2"	7.08854	0.000395536	-3.40281	59431.7	4489.1	58169.1	3949.28	15415.5	1633.34	54942.6	0.0755337	13.2391	1.12186
P56480|ATPB_MOUSE	ATP synthase subunit beta, mitochondrial OS=Mus musculus OX=10090 GN=Atp5f1b PE=1 SV=2"	5.7522	0.00120204	-2.92008	1471550	110733	1383100	105800	471173	43176.5	1.36082e+06	0.075249	13.2892	1.1235
Q03265|ATPA_MOUSE	ATP synthase subunit alpha, mitochondrial OS=Mus musculus OX=10090 GN=Atp5f1a PE=1 SV=1"	5.64964	0.0013194	-2.87962	1639675	122477	1515950	125430	535723	38365.2	1.5172e+06	0.0746957	13.3876	1.1267
Q9CQ62|DECR_MOUSE	2,4-dienoyl-CoA reductase [(3E)-enoyl-CoA-producing], mitochondrial OS=Mus musculus OX=10090 GN=Decr1 PE=1 SV=1"	5.80278	0.00114858	-2.93984	136470	9920	127470	9891.02	43458.7	3712.85	126550	0.0726899	13.7571	1.13853
Q64433|CH10_MOUSE	10 kDa heat shock protein, mitochondrial OS=Mus musculus OX=10090 GN=Hspe1 PE=1 SV=2"	5.94686	0.00101057	-2.99543	45623.2	3315.76	43093	3297.76	14192.7	1009.05	42307.4	0.0726772	13.7595	1.1386
Q9DCW4|ETFB_MOUSE	Electron transfer flavoprotein subunit beta OS=Mus musculus OX=10090 GN=Etfb PE=1 SV=3	6.08212	0.000898026	-3.04671	237428	17205	242285	16782.5	72070.2	7072.13	220223	0.0724642	13.7999	1.13988
Q99LB7|SARDH_MOUSE	Sarcosine dehydrogenase, mitochondrial OS=Mus musculus OX=10090 GN=Sardh PE=1 SV=1"	10.9785	3.39329e-05	-4.46938	373165	27006.5	361980	22820	60164.7	18891.6	346158	0.0723716	13.8176	1.14043
P42125|ECI1_MOUSE	Enoyl-CoA delta isomerase 1, mitochondrial OS=Mus musculus OX=10090 GN=Eci1 PE=1 SV=2"	6.51576	0.000623105	-3.20544	66736.6	4804.81	72488.9	2258.76	18186.6	5533.71	61931.8	0.0719966	13.8895	1.14269
P19783|COX41_MOUSE	Cytochrome c oxidase subunit 4 isoform 1, mitochondrial OS=Mus musculus OX=10090 GN=Cox4i1 PE=1 SV=2"	6.54193	0.000609883	-3.21475	136046	9739.73	136080	9947.04	38161.6	5895.16	126306	0.0715916	13.9681	1.14514
P38647|GRP75_MOUSE	Stress-70 protein, mitochondrial OS=Mus musculus OX=10090 GN=Hspa9 PE=1 SV=3"	6.02132	0.000946744	-3.02377	158908	11368.2	154225	11536	48975.9	1708.11	147539	0.0715395	13.9783	1.14545
P52196|THTR_MOUSE	Thiosulfate sulfurtransferase OS=Mus musculus OX=10090 GN=Tst PE=1 SV=3	5.54359	0.00145472	-2.83722	208490	14890.9	200740	15634	69804.3	2416.02	193599	0.0714228	14.0011	1.14616
Q91VA0|ACSM1_MOUSE	Acyl-coenzyme A synthetase ACSM1, mitochondrial OS=Mus musculus OX=10090 GN=Acsm1 PE=1 SV=1"	3.7926	0.00904577	-2.04355	35151.7	2486.15	30730.9	2276.87	17184.5	1194.09	32665.5	0.0707264	14.139	1.15042
P11725|OTC_MOUSE	Ornithine transcarbamylase, mitochondrial OS=Mus musculus OX=10090 GN=Otc PE=1 SV=1"	7.49043	0.000292611	-3.53371	400260	28257.2	419900	28585	98558.6	12335.4	372003	0.0705971	14.1649	1.15121
Q99K67|AASS_MOUSE	Alpha-aminoadipic semialdehyde synthase, mitochondrial OS=Mus musculus OX=10090 GN=Aass PE=1 SV=1"	5.13378	0.00214904	-2.66776	50063.3	3494.13	47410.8	3057.77	18051.8	1809.56	46569.2	0.0697942	14.3278	1.15618
Q99LC5|ETFA_MOUSE	Electron transfer flavoprotein subunit alpha, mitochondrial OS=Mus musculus OX=10090 GN=Etfa PE=1 SV=2"	6.08636	0.000894734	-3.04831	118901	8266.69	112431	9119.8	36101.5	4283.65	110634	0.0695259	14.3831	1.15785
P07724|ALBU_MOUSE	Albumin OS=Mus musculus OX=10090 GN=Alb PE=1 SV=3	6.34833	0.000715896	-3.14515	114105	7910.55	102881	7148.63	33091.8	4921.82	106194	0.0693271	14.4244	1.1591
P51174|ACADL_MOUSE	Long-chain specific acyl-CoA dehydrogenase, mitochondrial OS=Mus musculus OX=10090 GN=Acadl PE=1 SV=2"	4.2115	0.00561381	-2.25074	60309.2	4162.94	61545.5	4142.62	26604.7	1766.37	56146.3	0.0690266	14.4872	1.16098
P51863|VA0D1_MOUSE	V-type proton ATPase subunit d 1 OS=Mus musculus OX=10090 GN=Atp6v0d1 PE=1 SV=2	2.79672	0.0312992	-1.50447	17387.7	1200.17	12234.7	1283.88	11562.9	552.574	16187.5	0.0690241	14.4877	1.161
Q06185|ATP5I_MOUSE	ATP synthase subunit e, mitochondrial OS=Mus musculus OX=10090 GN=Atp5me PE=1 SV=2"	13.2607	1.13669e-05	-4.94436	22868.3	1576.44	23539.1	1744.78	3172.77	495.777	21291.9	0.0689355	14.5063	1.16156
Q60759|GCDH_MOUSE	Glutaryl-CoA dehydrogenase, mitochondrial OS=Mus musculus OX=10090 GN=Gcdh PE=1 SV=2"	5.35467	0.00173688	-2.76023	84410.1	5686.23	84175.5	5607.99	29285.3	2637.43	78723.9	0.0673644	14.8446	1.17157
Q921G7|ETFD_MOUSE	Electron transfer flavoprotein-ubiquinone oxidoreductase, mitochondrial OS=Mus musculus OX=10090 GN=Etfdh PE=1 SV=1"	4.70868	0.00329638	-2.48196	57741.4	3870.82	53312.5	3755.07	22787	2076.27	53870.6	0.0670372	14.9171	1.17368
Q99KI0|ACON_MOUSE	Aconitate hydratase, mitochondrial OS=Mus musculus OX=10090 GN=Aco2 PE=1 SV=1"	5.47064	0.00155698	-2.80772	37638	2509.07	35299.2	2693.19	12735.3	1657.57	35128.9	0.0666633	15.0008	1.17611
Q9D6R2|IDH3A_MOUSE	Isocitrate dehydrogenase [NAD] subunit alpha, mitochondrial OS=Mus musculus OX=10090 GN=Idh3a PE=1 SV=1"	4.76913	0.00309719	-2.50903	10046.1	660.716	10481.5	679.471	3932.75	156.934	9385.37	0.0657685	15.2049	1.18198
Q9CQZ6|NDUB3_MOUSE	NADH dehydrogenase [ubiquinone] 1 beta subcomplex subunit 3 OS=Mus musculus OX=10090 GN=Ndufb3 PE=1 SV=1	8.58681	0.0001371	-3.86296	3592.49	229.523	3489.31	228.371	737.084	265.037	3362.96	0.0638897	15.652	1.19457
Q8BWT1|THIM_MOUSE	3-ketoacyl-CoA thiolase, mitochondrial OS=Mus musculus OX=10090 GN=Acaa2 PE=1 SV=3"	6.26383	0.000768682	-3.11425	582255	36730.8	597670	37928.7	173555	14763.8	545524	0.0630838	15.8519	1.20008
Q62087|PON3_MOUSE	Serum paraoxonase_lactonase 3 OS=Mus musculus OX=10090 GN=Pon3 PE=1 SV=2	2.44562	0.0500881	-1.30027	15268.2	958.552	16021.8	852.279	11683.9	655.886	14309.6	0.0627811	15.9284	1.20217
Q60648|SAP3_MOUSE	Ganglioside GM2 activator OS=Mus musculus OX=10090 GN=Gm2a PE=1 SV=2	5.10167	0.00221776	-2.65409	3966.76	248.996	3347.23	245.362	1428.82	287.577	3717.77	0.0627706	15.931	1.20224
Q9Z0X1|AIFM1_MOUSE	Apoptosis-inducing factor 1, mitochondrial OS=Mus musculus OX=10090 GN=Aifm1 PE=1 SV=1"	4.44431	0.00435563	-2.36095	41333.8	2590.78	36213.2	2640.03	17432.4	294.297	38743	0.0626794	15.9542	1.20288
Q9CQF9|PCYOX_MOUSE	Prenylcysteine oxidase OS=Mus musculus OX=10090 GN=Pcyox1 PE=1 SV=1	6.53433	0.000613691	-3.21205	3456.82	216.029	3096.81	172.399	957.401	259.425	3240.79	0.0624937	16.0016	1.20416
Q9DBT9|M2GD_MOUSE	Dimethylglycine dehydrogenase, mitochondrial OS=Mus musculus OX=10090 GN=Dmgdh PE=1 SV=1"	5.23772	0.00194266	-2.7116	131063	8144.57	119630	7888.37	46904.7	1709.24	122918	0.0621425	16.0921	1.20661
Q61425|HCDH_MOUSE	Hydroxyacyl-coenzyme A dehydrogenase, mitochondrial OS=Mus musculus OX=10090 GN=Hadh PE=1 SV=2"	4.39198	0.0046081	-2.33648	269802	16745.1	241335	19051.2	115062	6326.87	253057	0.0620643	16.1123	1.20716
P45952|ACADM_MOUSE	Medium-chain specific acyl-CoA dehydrogenase, mitochondrial OS=Mus musculus OX=10090 GN=Acadm PE=1 SV=1"	6.04028	0.000931235	-3.03094	92878.2	5647.89	91751.2	6075.62	28704.1	3208.4	87230.3	0.0608097	16.4448	1.21603
P12265|BGLR_MOUSE	Beta-glucuronidase OS=Mus musculus OX=10090 GN=Gusb PE=1 SV=2	2.25602	0.0649025	-1.18774	13029.2	761.385	10957.6	695.628	10871.2	311.66	12267.8	0.0584369	17.1125	1.23331
P63038|CH60_MOUSE	60 kDa heat shock protein, mitochondrial OS=Mus musculus OX=10090 GN=Hspd1 PE=1 SV=1"	5.58026	0.00140621	-2.85195	380760	21591.8	374485	20889.4	128446	8520.13	359168	0.0567071	17.6345	1.24636
Q9JHI5|IVD_MOUSE	Isovaleryl-CoA dehydrogenase, mitochondrial OS=Mus musculus OX=10090 GN=Ivd PE=1 SV=1"	6.02547	0.000943326	-3.02534	131856	7350.91	132625	7906.93	41237.4	2708.6	124505	0.0557496	17.9374	1.25376
O09111|NDUBB_MOUSE	NADH dehydrogenase [ubiquinone] 1 beta subcomplex subunit 11, mitochondrial OS=Mus musculus OX=10090 GN=Ndufb11 PE=1 SV=2"	6.75785	0.000512284	-3.29049	28111.2	1527.68	26902.7	637.798	7619.51	1959.55	26583.5	0.0543443	18.4012	1.26485
Q99LP6|GRPE1_MOUSE	GrpE protein homolog 1, mitochondrial OS=Mus musculus OX=10090 GN=Grpel1 PE=1 SV=1"	2.71302	0.0349656	-1.45636	5896.67	319.257	6296.26	261.55	4099.51	315.032	5577.41	0.054142	18.4699	1.26647
Q9DCU9|HOGA1_MOUSE	4-hydroxy-2-oxoglutarate aldolase, mitochondrial OS=Mus musculus OX=10090 GN=Hoga1 PE=1 SV=1"	7.72999	0.000246045	-3.60898	52057.2	2757.22	52502.9	2769.94	12652.7	1616.02	49300	0.0529651	18.8804	1.27601
Q8QZT1|THIL_MOUSE	Acetyl-CoA acetyltransferase, mitochondrial OS=Mus musculus OX=10090 GN=Acat1 PE=1 SV=1"	5.09788	0.00222604	-2.65247	161463	8450.23	161515	8364.52	59944.7	3200.5	153013	0.0523353	19.1076	1.28121
P08249|MDHM_MOUSE	Malate dehydrogenase, mitochondrial OS=Mus musculus OX=10090 GN=Mdh2 PE=1 SV=3"	5.39471	0.00167223	-2.7767	176028	8455.85	168010	9973.28	61994.3	4019.5	167572	0.0480371	20.8172	1.31842
Q9CQA3|SDHB_MOUSE	Succinate dehydrogenase [ubiquinone] iron-sulfur subunit, mitochondrial OS=Mus musculus OX=10090 GN=Sdhb PE=1 SV=1"	6.45813	0.000653395	-3.18482	77533.9	3585.89	85760.7	3093.69	22776	2387.58	73948	0.0462493	21.6219	1.33489
Q8CHT0|AL4A1_MOUSE	Delta-1-pyrroline-5-carboxylate dehydrogenase, mitochondrial OS=Mus musculus OX=10090 GN=Aldh4a1 PE=1 SV=3"	4.87434	0.00278213	-2.55562	348198	15733.6	325635	16891.7	136316	5176.2	332464	0.0451859	22.1308	1.345
Q9CPP6|NDUA5_MOUSE	NADH dehydrogenase [ubiquinone] 1 alpha subcomplex subunit 5 OS=Mus musculus OX=10090 GN=Ndufa5 PE=1 SV=3	8.76273	0.000122353	-3.91238	5305.48	238.207	5242.33	175.234	1127.76	256.452	5067.27	0.0448984	22.2725	1.34777
P05202|AATM_MOUSE	Aspartate aminotransferase, mitochondrial OS=Mus musculus OX=10090 GN=Got2 PE=1 SV=1"	5.74852	0.00120604	-2.91864	301772	13166.9	304715	14343.5	100079	8153.34	288606	0.0436319	22.919	1.3602
Q9WUU7|CATZ_MOUSE	Cathepsin Z OS=Mus musculus OX=10090 GN=Ctsz PE=1 SV=1	2.37842	0.0548862	-1.26054	58016.5	2502.05	41814.3	2334.79	46664.9	1251.68	55514.4	0.0431266	23.1876	1.36526
Q99JB2|STML2_MOUSE	Stomatin-like protein 2, mitochondrial OS=Mus musculus OX=10090 GN=Stoml2 PE=1 SV=1"	4.33994	0.00487563	-2.31197	1855.36	74.1861	1868.29	0	807.306	148.372	1781.17	0.0399848	25.0095	1.3981
P11438|LAMP1_MOUSE	Lysosome-associated membrane glycoprotein 1 OS=Mus musculus OX=10090 GN=Lamp1 PE=1 SV=2	3.0999	0.0211191	-1.67533	14687	549.407	11795.9	443.796	9110.43	446.063	14137.6	0.0374076	26.7325	1.42704
Q99L13|3HIDH_MOUSE	3-hydroxyisobutyrate dehydrogenase, mitochondrial OS=Mus musculus OX=10090 GN=Hibadh PE=1 SV=1"	3.70531	0.0100251	-1.99891	23014.6	820.847	20630.9	771.093	11975.5	306.696	22193.8	0.0356663	28.0377	1.44774
Q9CRD2|EMC2_MOUSE	ER membrane protein complex subunit 2 OS=Mus musculus OX=10090 GN=Emc2 PE=1 SV=1	7.8066	0.000232999	-3.63265	4512.53	147.684	4446.98	129.06	1104.75	173.221	4364.85	0.0327275	30.5554	1.48509
P19536|COX5B_MOUSE	Cytochrome c oxidase subunit 5B, mitochondrial OS=Mus musculus OX=10090 GN=Cox5b PE=1 SV=1"	2.22423	0.0678021	-1.16876	2265.76	73.76	2430.88	0	1965.49	147.52	2192	0.0325543	30.718	1.48739
P17047|LAMP2_MOUSE	Lysosome-associated membrane glycoprotein 2 OS=Mus musculus OX=10090 GN=Lamp2 PE=1 SV=2	2.47646	0.048035	-1.31844	44184.7	1319.36	31725.8	1481.42	34601.5	1074.61	42865.3	0.0298601	33.4895	1.52491
P17439|GLCM_MOUSE	Lysosomal acid glucosylceramidase OS=Mus musculus OX=10090 GN=Gba PE=1 SV=1	2.11053	0.079315	-1.10064	14918.6	355.707	12971.7	387.003	13797.6	269.304	14562.9	0.0238432	41.9407	1.62264
P29758|OAT_MOUSE	Ornithine aminotransferase, mitochondrial OS=Mus musculus OX=10090 GN=Oat PE=1 SV=1"	5.08383	0.002257	-2.64647	208885	4021.74	193640	3448.97	80554.2	2531.82	204863	0.0192534	51.9389	1.71549

## Sheet: Quantification_FLM-Top_FLM-PO
Peak Name	Group	t-value	p-value	Log (p-value)	Mean FLM-Top	Mean FLM-PO	Median FLM-Top	Median FLM-PO	Sigma FLM-Top	Sigma FLM-PO	Delta	FLM-Po/FLMTop	Fold Change	Log (Fold Change)
Q8R086|SUOX_MOUSE	Sulfite oxidase, mitochondrial OS=Mus musculus OX=10090 GN=Suox PE=1 SV=2"	18.3114	1.70903e-06	-5.76725	33557.1	2472.99	34174.9	2583.91	3297.42	808.366	31084.1	0.073695	13.5695	1.13256
P42925|PXMP2_MOUSE	Peroxisomal membrane protein 2 OS=Mus musculus OX=10090 GN=Pxmp2 PE=1 SV=2	-15.8898	3.94283e-06	-5.40419	32426.9	204505	29437.7	203595	11172.6	18554.8	-172078	6.30666	0.158563	-0.799799
Q3UJU9|RMD3_MOUSE	Regulator of microtubule dynamics protein 3 OS=Mus musculus OX=10090 GN=Rmdn3 PE=1 SV=2	11.8739	2.15873e-05	-4.6658	7916.08	1527.89	7893.8	1693.3	906.553	579.605	6388.19	0.19301	5.18107	0.714419
P62897|CYC_MOUSE	Cytochrome c, somatic OS=Mus musculus OX=10090 GN=Cycs PE=1 SV=2"	11.6567	2.4019e-05	-4.61945	9425.71	712.045	9187.24	388.305	1170.19	930.483	8713.66	0.0755429	13.2375	1.12181
P50544|ACADV_MOUSE	Very long-chain specific acyl-CoA dehydrogenase, mitochondrial OS=Mus musculus OX=10090 GN=Acadvl PE=1 SV=3"	10.5403	4.28722e-05	-4.36782	30902.1	6750.33	30996.6	7041.01	4318.24	1534.34	24151.7	0.218443	4.57786	0.660662
Q791V5|MTCH2_MOUSE	Mitochondrial carrier homolog 2 OS=Mus musculus OX=10090 GN=Mtch2 PE=1 SV=1	10.4785	4.43423e-05	-4.35318	55208.8	12110.1	54802.8	12245.2	7871.23	2390.24	43098.7	0.21935	4.55891	0.658861
Q91WG0|EST2C_MOUSE	Acylcarnitine hydrolase OS=Mus musculus OX=10090 GN=Ces2c PE=1 SV=1	10.2959	4.90348e-05	-4.3095	15354.6	1273.35	15067	1499.03	2583.48	898.647	14081.3	0.0829291	12.0585	1.08129
P57780|ACTN4_MOUSE	Alpha-actinin-4 OS=Mus musculus OX=10090 GN=Actn4 PE=1 SV=1	9.97761	5.86648e-05	-4.23162	46624.6	3966.17	46090.1	4014.74	8409.62	1547.56	42658.4	0.0850661	11.7556	1.07024
Q80XN0|BDH_MOUSE	D-beta-hydroxybutyrate dehydrogenase, mitochondrial OS=Mus musculus OX=10090 GN=Bdh1 PE=1 SV=2"	9.83054	6.38439e-05	-4.19488	65378.5	14956.1	66294.5	17914.4	7123.5	7381.68	50422.5	0.228761	4.37137	0.640618
P03930|ATP8_MOUSE	ATP synthase protein 8 OS=Mus musculus OX=10090 GN=Mtatp8 PE=1 SV=1	9.662	7.04423e-05	-4.15217	18045.3	3260.89	18556.6	3971.11	2284.54	2036.29	14784.4	0.180705	5.53387	0.743029
P47758|SRPRB_MOUSE	Signal recognition particle receptor subunit beta OS=Mus musculus OX=10090 GN=Srprb PE=1 SV=1	9.13029	9.70717e-05	-4.01291	7108.29	1441.72	6931.88	1389.33	841.927	912.09	5666.57	0.202823	4.93042	0.692884
Q99PG0|AAAD_MOUSE	Arylacetamide deacetylase OS=Mus musculus OX=10090 GN=Aadac PE=1 SV=3	9.10063	9.88714e-05	-4.00493	87136.5	7452.9	92095.5	7241.93	17190.5	3338.24	79683.6	0.0855313	11.6916	1.06787
P00405|COX2_MOUSE	Cytochrome c oxidase subunit 2 OS=Mus musculus OX=10090 GN=Mtco2 PE=1 SV=1	8.97554	0.000106899	-3.97103	47113.8	11827	49396.2	12896	6236.62	4788.47	35286.8	0.251031	3.98358	0.600273
P56135|ATPK_MOUSE	ATP synthase subunit f, mitochondrial OS=Mus musculus OX=10090 GN=Atp5mf PE=1 SV=3"	8.87814	0.000113673	-3.94434	89245.2	33595.6	87254.4	32988.3	10611.5	6674.91	55649.6	0.376442	2.65645	0.424302
Q9CQ62|DECR_MOUSE	2,4-dienoyl-CoA reductase [(3E)-enoyl-CoA-producing], mitochondrial OS=Mus musculus OX=10090 GN=Decr1 PE=1 SV=1"	8.8455	0.000116054	-3.93534	50979.1	14129	51763.1	15897.7	5465.35	6288.99	36850.1	0.277153	3.60812	0.55728
Q7TNG8|LDHD_MOUSE	Probable D-lactate dehydrogenase, mitochondrial OS=Mus musculus OX=10090 GN=Ldhd PE=1 SV=1"	8.814	0.000118406	-3.92663	2743.02	905.881	2872.1	895.032	378.991	173.625	1837.14	0.330249	3.02802	0.481158
Q8R0F9|S14L4_MOUSE	SEC14-like protein 4 OS=Mus musculus OX=10090 GN=Sec14l4 PE=1 SV=1	8.80801	0.000118859	-3.92497	20720.3	2696.96	21435.7	2835.4	3810.74	1492.26	18023.4	0.13016	7.68286	0.885523
P19253|RL13A_MOUSE	60S ribosomal protein L13a OS=Mus musculus OX=10090 GN=Rpl13a PE=1 SV=4	8.49195	0.0001459	-3.83595	25220.1	2872.33	24860.5	2674.81	4517.07	2701.52	22347.8	0.113891	8.78035	0.943512
Q6XVG2|CP254_MOUSE	Cytochrome P450 2C54 OS=Mus musculus OX=10090 GN=Cyp2c54 PE=1 SV=1	8.40991	0.00015404	-3.81237	119658	32028.3	113721	30641.9	18513.7	9567.22	87629.6	0.267665	3.73601	0.572408
Q9Z239|PLM_MOUSE	Phospholemman OS=Mus musculus OX=10090 GN=Fxyd1 PE=1 SV=1	8.39323	0.000155758	-3.80755	6204.17	605.776	6608.88	502.511	1172.55	636.198	5598.4	0.0976402	10.2417	1.01037
Q9CZ13|QCR1_MOUSE	Cytochrome b-c1 complex subunit 1, mitochondrial OS=Mus musculus OX=10090 GN=Uqcrc1 PE=1 SV=2"	8.2981	0.000165993	-3.77991	122462	15948	117435	15519.4	24707	6972.46	106514	0.130228	7.67885	0.885296
Q9WTP6|KAD2_MOUSE	Adenylate kinase 2, mitochondrial OS=Mus musculus OX=10090 GN=Ak2 PE=1 SV=5"	8.27554	0.000168532	-3.77332	60887.6	5835.37	64631.3	5777	13066.7	2505.81	55052.3	0.0958384	10.4342	1.01846
P18242|CATD_MOUSE	Cathepsin D OS=Mus musculus OX=10090 GN=Ctsd PE=1 SV=1	8.27354	0.000168759	-3.77273	35423.7	6877.14	36612.3	7246.15	6173.57	3083.26	28546.5	0.19414	5.15093	0.711886
Q80UM7|MOGS_MOUSE	Mannosyl-oligosaccharide glucosidase OS=Mus musculus OX=10090 GN=Mogs PE=1 SV=1	8.26189	0.00017009	-3.76932	40916.1	3109.97	39429.5	3607.34	9024.58	1521.45	37806.1	0.0760086	13.1564	1.11914
P67778|PHB_MOUSE	Prohibitin OS=Mus musculus OX=10090 GN=Phb PE=1 SV=1	8.2597	0.000170341	-3.76868	93329.2	31383.2	90543.6	31574.3	13099.4	7307.05	61946	0.336263	2.97386	0.47332
Q8BHN3|GANAB_MOUSE	Neutral alpha-glucosidase AB OS=Mus musculus OX=10090 GN=Ganab PE=1 SV=1	8.21042	0.000176117	-3.7542	107095	7534.81	110273	7445.76	24092.7	2776	99559.9	0.0703565	14.2133	1.1527
P50172|DHI1_MOUSE	Corticosteroid 11-beta-dehydrogenase isozyme 1 OS=Mus musculus OX=10090 GN=Hsd11b1 PE=1 SV=3	8.20844	0.000176354	-3.75361	90854.6	14250.7	93773	15350.8	17956.1	5094.1	76603.9	0.156852	6.37543	0.804509
Q8VC48|PEX12_MOUSE	Peroxisome assembly protein 12 OS=Mus musculus OX=10090 GN=Pex12 PE=1 SV=1	-8.17161	0.000180825	-3.74274	1092.29	4100.63	1049.37	3995.91	400.828	617.625	-3008.34	3.75416	0.266371	-0.574513
Q9CZU6|CISY_MOUSE	Citrate synthase, mitochondrial OS=Mus musculus OX=10090 GN=Cs PE=1 SV=1"	8.14879	0.000183661	-3.73598	51726.6	7842.6	53681.6	7215.8	9216.6	5573.3	43884	0.151616	6.59559	0.819254
Q921X9|PDIA5_MOUSE	Protein disulfide-isomerase A5 OS=Mus musculus OX=10090 GN=Pdia5 PE=1 SV=1	8.0472	0.000196927	-3.70569	29463.1	2640.89	29972.9	2687.53	6475.85	1581.79	26822.2	0.0896336	11.1565	1.04753
O09111|NDUBB_MOUSE	NADH dehydrogenase [ubiquinone] 1 beta subcomplex subunit 11, mitochondrial OS=Mus musculus OX=10090 GN=Ndufb11 PE=1 SV=2"	8.04118	0.000197748	-3.70389	18146.8	2002.97	19661.1	1736.77	3660.19	1650.96	16143.9	0.110376	9.05997	0.957127
Q60605|MYL6_MOUSE	Myosin light polypeptide 6 OS=Mus musculus OX=10090 GN=Myl6 PE=1 SV=3	8.00635	0.00020257	-3.69343	13299.7	928.963	14164.4	910.736	2991.2	776.056	12370.7	0.0698484	14.3167	1.15584
P52430|PON1_MOUSE	Serum paraoxonase_arylesterase 1 OS=Mus musculus OX=10090 GN=Pon1 PE=1 SV=2	7.99194	0.000204606	-3.68908	82444.2	7868.88	78490.3	7484.4	18479	2611.53	74575.3	0.0954449	10.4773	1.02025
Q9CPQ1|COX6C_MOUSE	Cytochrome c oxidase subunit 6C OS=Mus musculus OX=10090 GN=Cox6c PE=1 SV=3	7.99188	0.000204614	-3.68906	61057.2	15911.9	63161.1	14568.3	9583.52	5983	45145.3	0.260606	3.8372	0.584015
Q62452|UD19_MOUSE	UDP-glucuronosyltransferase 1A9 OS=Mus musculus OX=10090 GN=Ugt1a9 PE=1 SV=3	7.9848	0.000205622	-3.68693	12709.8	917.388	12270.6	876.067	2943.51	245.242	11792.4	0.0721797	13.8543	1.14158
P26443|DHE3_MOUSE	Glutamate dehydrogenase 1, mitochondrial OS=Mus musculus OX=10090 GN=Glud1 PE=1 SV=1"	7.9659	0.000208343	-3.68122	193985	52067.6	189660	51719	34842.9	7453.74	141917	0.26841	3.72564	0.571201
Q9ERS2|NDUAD_MOUSE	NADH dehydrogenase [ubiquinone] 1 alpha subcomplex subunit 13 OS=Mus musculus OX=10090 GN=Ndufa13 PE=1 SV=3	7.77629	0.000238064	-3.62331	8975.18	1706.45	9152.22	1604.13	1604.22	959.873	7268.73	0.19013	5.25956	0.72095
Q9DB77|QCR2_MOUSE	Cytochrome b-c1 complex subunit 2, mitochondrial OS=Mus musculus OX=10090 GN=Uqcrc2 PE=1 SV=1"	7.73247	0.000245609	-3.60976	63027.2	13948.8	67965.2	14875.2	11746.4	4812.66	49078.4	0.221313	4.51848	0.654992
P22599|A1AT2_MOUSE	Alpha-1-antitrypsin 1-2 OS=Mus musculus OX=10090 GN=Serpina1b PE=1 SV=2	7.66837	0.000257151	-3.58981	48535.7	4225.78	45978.9	4648.53	11447.1	1586.99	44309.9	0.0870655	11.4856	1.06015
P56654|CP237_MOUSE	Cytochrome P450 2C37 OS=Mus musculus OX=10090 GN=Cyp2c37 PE=1 SV=2	7.65045	0.000260487	-3.58421	5658.39	716.346	5606.06	880.947	1233.4	384.57	4942.04	0.126599	7.89897	0.89757
P45878|FKBP2_MOUSE	Peptidyl-prolyl cis-trans isomerase FKBP2 OS=Mus musculus OX=10090 GN=Fkbp2 PE=1 SV=1	7.54644	0.000280875	-3.55149	37296.5	4165.87	37509.3	3998.44	8697.43	1204.7	33130.6	0.111696	8.95286	0.951962
P80316|TCPE_MOUSE	T-complex protein 1 subunit epsilon OS=Mus musculus OX=10090 GN=Cct5 PE=1 SV=1	7.50921	0.000288614	-3.53968	7313.79	925.099	6925.2	690.322	1564.25	669.666	6388.69	0.126487	7.90595	0.897954
Q01339|APOH_MOUSE	Beta-2-glycoprotein 1 OS=Mus musculus OX=10090 GN=Apoh PE=1 SV=1	7.50633	0.000289223	-3.53877	8510.44	714.782	8990.71	795.675	2003.49	548.036	7795.66	0.0839888	11.9063	1.07578
P11725|OTC_MOUSE	Ornithine transcarbamylase, mitochondrial OS=Mus musculus OX=10090 GN=Otc PE=1 SV=1"	7.49542	0.000291542	-3.5353	141186	28680.8	140910	25738.8	27317.7	12446.9	112505	0.203142	4.92266	0.6922
P52825|CPT2_MOUSE	Carnitine O-palmitoyltransferase 2, mitochondrial OS=Mus musculus OX=10090 GN=Cpt2 PE=1 SV=2"	7.45339	0.000300683	-3.52189	17955.2	4889.8	18202.9	3948.29	2055.33	2840.22	13065.4	0.272334	3.67196	0.564898
P56480|ATPB_MOUSE	ATP synthase subunit beta, mitochondrial OS=Mus musculus OX=10090 GN=Atp5f1b PE=1 SV=2"	7.44805	0.000301867	-3.52018	617612	155592	588260	153175	123498	11846.6	462020	0.251926	3.96942	0.598727
Q8VCW8|ACSF2_MOUSE	Medium-chain acyl-CoA ligase ACSF2, mitochondrial OS=Mus musculus OX=10090 GN=Acsf2 PE=1 SV=1"	7.36164	0.000321805	-3.49241	17071.9	4981.84	17090.1	4752.67	2480.52	2153.06	12090	0.291816	3.42682	0.534891
Q9D172|GAL3A_MOUSE	Glutamine amidotransferase-like class 1 domain-containing protein 3A, mitochondrial OS=Mus musculus OX=10090 GN=Gatd3a PE=1 SV=1"	7.34871	0.000324916	-3.48823	29989.2	5279.04	28106	4875.46	6630.15	1125.64	24710.1	0.176032	5.6808	0.754409
Q9CR62|M2OM_MOUSE	Mitochondrial 2-oxoglutarate_malate carrier protein OS=Mus musculus OX=10090 GN=Slc25a11 PE=1 SV=3	7.29723	0.000337656	-3.47153	13268.4	3096.89	13406.4	3207.12	1203.49	2514.61	10171.5	0.233403	4.28443	0.631893
P51863|VA0D1_MOUSE	V-type proton ATPase subunit d 1 OS=Mus musculus OX=10090 GN=Atp6v0d1 PE=1 SV=2	7.29066	0.000339322	-3.46939	6818.85	878.608	6132.8	826.526	1611.46	242.133	5940.25	0.12885	7.76097	0.889916
P08113|ENPL_MOUSE	Endoplasmin OS=Mus musculus OX=10090 GN=Hsp90b1 PE=1 SV=2	7.25642	0.000348163	-3.45822	874320	60259.7	949630	54736.2	223601	18559	814060	0.0689218	14.5092	1.16164
Q14DH7|ACSS3_MOUSE	Acyl-CoA synthetase short-chain family member 3, mitochondrial OS=Mus musculus OX=10090 GN=Acss3 PE=1 SV=2"	7.24455	0.000351288	-3.45434	34016.4	6677.37	32949.3	7404.96	6726.1	3424.04	27339.1	0.196299	5.09428	0.707083
Q9DBG6|RPN2_MOUSE	Dolichyl-diphosphooligosaccharide--protein glycosyltransferase subunit 2 OS=Mus musculus OX=10090 GN=Rpn2 PE=1 SV=1	7.208	0.00036112	-3.44235	56908.5	5825.92	62163.5	5409.34	13681.4	3703.57	51082.6	0.102373	9.76817	0.989813
P33267|CP2F2_MOUSE	Cytochrome P450 2F2 OS=Mus musculus OX=10090 GN=Cyp2f2 PE=1 SV=1	7.20563	0.000361769	-3.44157	239640	24094.9	261140	23946.2	59449.4	6709.67	215545	0.100546	9.94568	0.997634
Q9D6M3|GHC1_MOUSE	Mitochondrial glutamate carrier 1 OS=Mus musculus OX=10090 GN=Slc25a22 PE=1 SV=1	7.11692	0.000387029	-3.41226	21544.6	6154.84	20546.8	5385.94	3540.45	2483.85	15389.8	0.285679	3.50043	0.544122
O54734|OST48_MOUSE	Dolichyl-diphosphooligosaccharide--protein glycosyltransferase 48 kDa subunit OS=Mus musculus OX=10090 GN=Ddost PE=1 SV=2	7.02869	0.000414185	-3.38281	273848	17667.7	294865	14225.1	72094.6	10775.6	256180	0.0645164	15.4999	1.19033
P97807|FUMH_MOUSE	Fumarate hydratase, mitochondrial OS=Mus musculus OX=10090 GN=Fh PE=1 SV=3"	6.99975	0.000423567	-3.37308	18648.7	4850.69	18628.6	3645.23	2665.12	2905.17	13798.1	0.260108	3.84456	0.584846
Q8K0E8|FIBB_MOUSE	Fibrinogen beta chain OS=Mus musculus OX=10090 GN=Fgb PE=1 SV=1	6.96874	0.000433888	-3.36262	9229.65	865.599	8732.51	829.659	2383.52	284.622	8364.06	0.0937845	10.6627	1.02787
Q99MR8|MCCA_MOUSE	Methylcrotonoyl-CoA carboxylase subunit alpha, mitochondrial OS=Mus musculus OX=10090 GN=Mccc1 PE=1 SV=2"	6.90995	0.000454263	-3.34269	9090.2	2256.69	9169.92	1803.95	1287.97	1501.04	6833.51	0.248255	4.02812	0.605102
Q9WVD5|ORNT1_MOUSE	Mitochondrial ornithine transporter 1 OS=Mus musculus OX=10090 GN=Slc25a15 PE=1 SV=1	6.90221	0.000457027	-3.34006	4481.01	2540.54	4658.13	2568.19	537.092	166.388	1940.47	0.566957	1.7638	0.24645
Q8VCM8|NCLN_MOUSE	Nicalin OS=Mus musculus OX=10090 GN=Ncln PE=1 SV=2	6.89369	0.000460092	-3.33716	18812.4	1025.9	19192.1	986.404	5145.35	391.717	17786.5	0.0545333	18.3374	1.26334
P29758|OAT_MOUSE	Ornithine aminotransferase, mitochondrial OS=Mus musculus OX=10090 GN=Oat PE=1 SV=1"	6.87144	0.000468206	-3.32956	90068.3	9897.71	89040.3	8856.12	23101.2	3291.03	80170.6	0.109891	9.09992	0.959038
Q8VEK0|CC50A_MOUSE	Cell cycle control protein 50A OS=Mus musculus OX=10090 GN=Tmem30a PE=1 SV=1	6.83333	0.000482488	-3.31651	24499.8	1145.8	22814.1	513.464	6707.1	1317.7	23354	0.0467679	21.3822	1.33005
Q9QXX4|CMC2_MOUSE	Calcium-binding mitochondrial carrier protein Aralar2 OS=Mus musculus OX=10090 GN=Slc25a13 PE=1 SV=1	6.79316	0.000498088	-3.30269	48718.9	13589.2	49710.9	13084.3	9526.47	4027.01	35129.7	0.278931	3.58512	0.554503
P42125|ECI1_MOUSE	Enoyl-CoA delta isomerase 1, mitochondrial OS=Mus musculus OX=10090 GN=Eci1 PE=1 SV=2"	6.77535	0.000505192	-3.29654	25042.9	4088.57	26834.2	3868.14	5982.3	1572.21	20954.3	0.163263	6.12509	0.787112
Q63880|EST3A_MOUSE	Carboxylesterase 3A OS=Mus musculus OX=10090 GN=Ces3a PE=1 SV=2	6.76878	0.000507842	-3.29427	427072	44414.1	446325	44139.8	112384	12396.3	382658	0.103997	9.61571	0.982981
Q9D1Q6|ERP44_MOUSE	Endoplasmic reticulum resident protein 44 OS=Mus musculus OX=10090 GN=Erp44 PE=1 SV=1	6.7459	0.000517188	-3.28635	51042	3271.95	52472.3	3407.35	14122.5	1065.66	47770	0.0641032	15.5998	1.19312
P17047|LAMP2_MOUSE	Lysosome-associated membrane glycoprotein 2 OS=Mus musculus OX=10090 GN=Lamp2 PE=1 SV=2	6.70268	0.000535396	-3.27132	17626.7	759.352	17199.5	553.894	4963.7	832.409	16867.4	0.0430796	23.2128	1.36573
Q91WU0|EST1F_MOUSE	Carboxylesterase 1F OS=Mus musculus OX=10090 GN=Ces1f PE=1 SV=1	6.69853	0.000537184	-3.26988	154088	15118.1	162855	15674.4	41154.6	5284.41	138969	0.0981135	10.1923	1.00827
Q91YQ5|RPN1_MOUSE	Dolichyl-diphosphooligosaccharide--protein glycosyltransferase subunit 1 OS=Mus musculus OX=10090 GN=Rpn1 PE=1 SV=1	6.64103	0.000562656	-3.24976	282522	20863.2	297015	18444	78384.9	8085.67	261659	0.0738462	13.5417	1.13167
P20918|PLMN_MOUSE	Plasminogen OS=Mus musculus OX=10090 GN=Plg PE=1 SV=3	6.61008	0.000576942	-3.23887	27719.1	3183.75	28117.7	3295.27	7398.04	615.623	24535.3	0.114858	8.70642	0.939839
Q9Z2I8|SUCB2_MOUSE	Succinate--CoA ligase [GDP-forming] subunit beta, mitochondrial OS=Mus musculus OX=10090 GN=Suclg2 PE=1 SV=3"	6.59013	0.00058637	-3.23183	13134.8	2808.49	12811.1	2768.01	2411.14	2001.89	10326.3	0.21382	4.67683	0.669952
Q9R0H0|ACOX1_MOUSE	Peroxisomal acyl-coenzyme A oxidase 1 OS=Mus musculus OX=10090 GN=Acox1 PE=1 SV=5	-6.55191	0.000604928	-3.2183	134462	1915325	135715	1752450	26686.6	542961	-1.78086e+06	14.2443	0.0702035	-1.15364
Q99LC5|ETFA_MOUSE	Electron transfer flavoprotein subunit alpha, mitochondrial OS=Mus musculus OX=10090 GN=Etfa PE=1 SV=2"	6.5514	0.000605181	-3.21811	48941.7	8402.8	51317.2	7082.97	11733.5	3934.71	40538.9	0.17169	5.82445	0.765255
P20029|BIP_MOUSE	Endoplasmic reticulum chaperone BiP OS=Mus musculus OX=10090 GN=Hspa5 PE=1 SV=3	6.53591	0.000612897	-3.21261	428158	36106.8	446545	34163.4	119146	14020	392051	0.0843307	11.8581	1.07401
P12815|PDCD6_MOUSE	Programmed cell death protein 6 OS=Mus musculus OX=10090 GN=Pdcd6 PE=1 SV=2	-6.52562	0.000618089	-3.20895	694.254	3048.66	741.285	3083.1	578.316	431.556	-2354.4	4.39127	0.227725	-0.64259
Q8VCH0|THIKB_MOUSE	3-ketoacyl-CoA thiolase B, peroxisomal OS=Mus musculus OX=10090 GN=Acaa1b PE=1 SV=1"	-6.52049	0.000620693	-3.20712	200355	1357800	189950	1243900	48215.1	351729	-1157445	6.77697	0.147559	-0.831036
Q8CHT0|AL4A1_MOUSE	Delta-1-pyrroline-5-carboxylate dehydrogenase, mitochondrial OS=Mus musculus OX=10090 GN=Aldh4a1 PE=1 SV=3"	6.51418	0.000623914	-3.20488	119489	20781.9	118040	22446	28728.8	9646.81	98706.8	0.173923	5.74966	0.759642
Q922D8|C1TC_MOUSE	C-1-tetrahydrofolate synthase, cytoplasmic OS=Mus musculus OX=10090 GN=Mthfd1 PE=1 SV=4"	6.41148	0.00067915	-3.16803	91900.2	10897.5	98349.4	11042.9	25254	840.394	81002.7	0.11858	8.43314	0.925989
P97501|FMO3_MOUSE	Dimethylaniline monooxygenase [N-oxide-forming] 3 OS=Mus musculus OX=10090 GN=Fmo3 PE=1 SV=1	6.3901	0.000691344	-3.16031	174825	18990.2	182160	20658.2	48017.8	8554.37	155835	0.108624	9.20608	0.964075
Q03265|ATPA_MOUSE	ATP synthase subunit alpha, mitochondrial OS=Mus musculus OX=10090 GN=Atp5f1a PE=1 SV=1"	6.38339	0.000695221	-3.15788	737995	182390	733510	177705	173440	14890.4	555605	0.247143	4.04625	0.607052
Q8BWQ1|UD2A3_MOUSE	UDP-glucuronosyltransferase 2A3 OS=Mus musculus OX=10090 GN=Ugt2a3 PE=1 SV=1	6.37851	0.000698056	-3.15611	213435	20869	233420	20477	59123.5	12251.7	192566	0.0977768	10.2274	1.00976
P80314|TCPB_MOUSE	T-complex protein 1 subunit beta OS=Mus musculus OX=10090 GN=Cct2 PE=1 SV=4	6.36338	0.000706935	-3.15062	13323.2	1425.08	14275.7	800.313	3494.33	1331.87	11898.1	0.106963	9.34903	0.970767
P14824|ANXA6_MOUSE	Annexin A6 OS=Mus musculus OX=10090 GN=Anxa6 PE=1 SV=3	6.3356	0.000723578	-3.14051	61266.1	11232.2	59424.2	9558.52	14608.7	6004.42	50034	0.183334	5.45453	0.736757
Q9CQS8|SC61B_MOUSE	Protein transport protein Sec61 subunit beta OS=Mus musculus OX=10090 GN=Sec61b PE=1 SV=3	6.28618	0.000754297	-3.12246	46810.6	4140.98	45394.7	3661.24	13420.2	2048.63	42669.6	0.0884625	11.3042	1.05324
Q9D0S9|HINT2_MOUSE	Histidine triad nucleotide-binding protein 2, mitochondrial OS=Mus musculus OX=10090 GN=Hint2 PE=1 SV=1"	6.24861	0.000778656	-3.10865	6450.28	1464.95	6106.68	1242.22	1396.84	771.336	4985.33	0.227114	4.40308	0.643757
Q8VCC2|EST1_MOUSE	Liver carboxylesterase 1 OS=Mus musculus OX=10090 GN=Ces1 PE=1 SV=1	6.24488	0.000781127	-3.10728	63380.7	6753.68	60928.4	7150.92	18046.2	1797.26	56627	0.106557	9.38461	0.972416
Q3UEG6|AGT2_MOUSE	Alanine--glyoxylate aminotransferase 2, mitochondrial OS=Mus musculus OX=10090 GN=Agxt2 PE=1 SV=1"	6.24259	0.000782646	-3.10643	8859.71	2950.59	9003.04	2721.84	1564.98	1065.32	5909.11	0.333035	3.00269	0.47751
P51881|ADT2_MOUSE	ADP_ATP translocase 2 OS=Mus musculus OX=10090 GN=Slc25a5 PE=1 SV=3	6.2351	0.000787638	-3.10367	452962	123867	463710	121090	101880	27639.3	329095	0.273461	3.65683	0.563105
Q9Z0R9|FADS2_MOUSE	Acyl-CoA 6-desaturase OS=Mus musculus OX=10090 GN=Fads2 PE=1 SV=1	6.21863	0.000798742	-3.09759	4885.84	581.57	5208.54	456.09	1245.16	604.894	4304.27	0.119032	8.40112	0.924337
Q00897|A1AT4_MOUSE	Alpha-1-antitrypsin 1-4 OS=Mus musculus OX=10090 GN=Serpina1d PE=1 SV=1	6.21037	0.000804382	-3.09454	21040.5	1685.37	22317.4	1781.39	6220.13	403.203	19355.2	0.0801009	12.4843	1.09636
P08003|PDIA4_MOUSE	Protein disulfide-isomerase A4 OS=Mus musculus OX=10090 GN=Pdia4 PE=1 SV=3	6.18823	0.000819719	-3.08634	181060	11707.1	193200	10866.3	54447.6	5591.09	169353	0.0646585	15.4659	1.18937
Q4LDG0|S27A5_MOUSE	Bile acyl-CoA synthetase OS=Mus musculus OX=10090 GN=Slc27a5 PE=1 SV=2	6.17243	0.000830867	-3.08047	143372	13874.8	155320	15409.9	41225.7	7814.39	129497	0.0967748	10.3333	1.01424
Q8CAQ8|MIC60_MOUSE	MICOS complex subunit Mic60 OS=Mus musculus OX=10090 GN=Immt PE=1 SV=1	6.15462	0.000843644	-3.07384	33474	5340.72	37573.1	5215.75	9097.6	901.469	28133.2	0.159548	6.26769	0.797107
P56593|CP2AC_MOUSE	Cytochrome P450 2A12 OS=Mus musculus OX=10090 GN=Cyp2a12 PE=1 SV=2	6.15095	0.000846304	-3.07247	175212	23724.5	187935	25139.4	48411.7	9085.14	151488	0.135404	7.38529	0.868368
Q9DBT9|M2GD_MOUSE	Dimethylglycine dehydrogenase, mitochondrial OS=Mus musculus OX=10090 GN=Dmgdh PE=1 SV=1"	6.1309	0.000861008	-3.06499	52773.1	9516.28	53903.4	9559.08	13952.2	2111.32	43256.8	0.180325	5.54556	0.743945
Q8K3J1|NDUS8_MOUSE	NADH dehydrogenase [ubiquinone] iron-sulfur protein 8, mitochondrial OS=Mus musculus OX=10090 GN=Ndufs8 PE=1 SV=1"	6.12744	0.00086358	-3.0637	5737.39	1696.29	5520.92	1563.32	1187.19	574.789	4041.09	0.295656	3.38231	0.529213
O08601|MTP_MOUSE	Microsomal triglyceride transfer protein large subunit OS=Mus musculus OX=10090 GN=Mttp PE=1 SV=2	6.12411	0.000866053	-3.06246	110834	10677.9	122688	11657.5	32522	3489.53	100156	0.0963415	10.3797	1.01619
P15392|CP2A4_MOUSE	Cytochrome P450 2A4 OS=Mus musculus OX=10090 GN=Cyp2a4 PE=2 SV=3	6.10382	0.000881339	-3.05486	12254.8	1690.58	13515.2	1688.23	3377.48	758.095	10564.2	0.137952	7.24888	0.860271
P80318|TCPG_MOUSE	T-complex protein 1 subunit gamma OS=Mus musculus OX=10090 GN=Cct3 PE=1 SV=1	6.09419	0.000888697	-3.05125	30123	2786.9	28485.2	2277.07	8782.41	1830.76	27336.1	0.0925172	10.8088	1.03378
O35728|CP4AE_MOUSE	Cytochrome P450 4A14 OS=Mus musculus OX=10090 GN=Cyp4a14 PE=1 SV=1	6.08324	0.000897159	-3.04713	10465.5	964.05	10542.3	863.409	2998	877.65	9501.47	0.0921168	10.8558	1.03566
P32020|SCP2_MOUSE	Sterol carrier protein 2 OS=Mus musculus OX=10090 GN=Scp2 PE=1 SV=3	-6.08216	0.000897992	-3.04673	73625.3	596272	73488	566140	10200.9	171559	-522647	8.09875	0.123476	-0.908418
P45952|ACADM_MOUSE	Medium-chain specific acyl-CoA dehydrogenase, mitochondrial OS=Mus musculus OX=10090 GN=Acadm PE=1 SV=1"	6.05897	0.000916226	-3.038	38122.6	7896.35	38999.7	7176.86	9806.31	1839.56	30226.3	0.20713	4.82788	0.683757
Q921I1|TRFE_MOUSE	Serotransferrin OS=Mus musculus OX=10090 GN=Tf PE=1 SV=1	6.05534	0.00091912	-3.03663	139263	11980.1	140790	8725.33	41233.9	8192.86	127283	0.0860248	11.6245	1.06538
Q91X77|CY250_MOUSE	Cytochrome P450 2C50 OS=Mus musculus OX=10090 GN=Cyp2c50 PE=1 SV=2	6.05037	0.000923101	-3.03475	64584.7	9079.96	65538.7	9022.9	17680.9	4900.99	55504.8	0.14059	7.11289	0.852046
P08752|GNAI2_MOUSE	Guanine nucleotide-binding protein G(i) subunit alpha-2 OS=Mus musculus OX=10090 GN=Gnai2 PE=1 SV=5	6.04921	0.000924033	-3.03431	28226.9	2912.26	29964.5	2983.25	8032.52	2351.27	25314.7	0.103173	9.69246	0.986434
Q76M72|S22AR_MOUSE	Solute carrier family 22 member 27 OS=Mus musculus OX=10090 GN=Slc22a27 PE=1 SV=1	6.04713	0.000925702	-3.03353	40177.4	4235.85	39927.1	3728.61	11818	1280.03	35941.6	0.105429	9.48509	0.977042
P19783|COX41_MOUSE	Cytochrome c oxidase subunit 4 isoform 1, mitochondrial OS=Mus musculus OX=10090 GN=Cox4i1 PE=1 SV=2"	6.04361	0.000928543	-3.0322	78496.6	14980.8	83599.1	12803.1	20451.6	4851.58	63515.7	0.190847	5.2398	0.719315
P38647|GRP75_MOUSE	Stress-70 protein, mitochondrial OS=Mus musculus OX=10090 GN=Hspa9 PE=1 SV=3"	6.00848	0.000957416	-3.0189	61591.7	11901.9	63119.5	13645.2	14644.4	7688.24	49689.8	0.193238	5.17496	0.713907
Q64433|CH10_MOUSE	10 kDa heat shock protein, mitochondrial OS=Mus musculus OX=10090 GN=Hspe1 PE=1 SV=2"	6.00304	0.000961978	-3.01683	16586.8	3128.4	16736.3	2629.31	4193.98	1586.11	13458.5	0.188607	5.30203	0.724442
P54869|HMCS2_MOUSE	Hydroxymethylglutaryl-CoA synthase, mitochondrial OS=Mus musculus OX=10090 GN=Hmgcs2 PE=1 SV=2"	5.91776	0.00103685	-2.98428	272852	55781.9	253050	53825.3	72272.2	12601	217071	0.20444	4.89142	0.689435
O08795|GLU2B_MOUSE	Glucosidase 2 subunit beta OS=Mus musculus OX=10090 GN=Prkcsh PE=1 SV=1	5.90104	0.0010523	-2.97786	58950.8	5572.2	60838.5	5811.65	18076	743.933	53378.6	0.0945229	10.5795	1.02446
Q922R8|PDIA6_MOUSE	Protein disulfide-isomerase A6 OS=Mus musculus OX=10090 GN=Pdia6 PE=1 SV=3	5.89061	0.00106206	-2.97385	104771	6965.7	105385	6751.31	33090.9	2776.36	97805.4	0.0664849	15.041	1.17728
Q91VD9|NDUS1_MOUSE	NADH-ubiquinone oxidoreductase 75 kDa subunit, mitochondrial OS=Mus musculus OX=10090 GN=Ndufs1 PE=1 SV=2"	5.85795	0.00109334	-2.96125	22904.1	5172.96	20862.6	4931.56	5497.15	2535.47	17731.1	0.225853	4.42766	0.646174
Q8BGC4|PTGR3_MOUSE	Prostaglandin reductase-3 OS=Mus musculus OX=10090 GN=Zadh2 PE=1 SV=1	-5.85051	0.0011006	-2.95837	11992	66912.2	11089.4	68478.2	3008.37	18531.9	-54920.2	5.57973	0.17922	-0.746613
Q9JLF6|TGM1_MOUSE	Protein-glutamine gamma-glutamyltransferase K OS=Mus musculus OX=10090 GN=Tgm1 PE=1 SV=2	5.81821	0.00113281	-2.94584	4806.85	462.864	4536.32	419.127	1392.48	539.22	4343.99	0.0962924	10.385	1.01641
Q05421|CP2E1_MOUSE	Cytochrome P450 2E1 OS=Mus musculus OX=10090 GN=Cyp2e1 PE=1 SV=1	5.81791	0.00113311	-2.94573	174438	34966.9	193325	34605.6	44681.3	17387.6	139471	0.200455	4.98864	0.697982
Q91W64|CP270_MOUSE	Cytochrome P450 2C70 OS=Mus musculus OX=10090 GN=Cyp2c70 PE=1 SV=2	5.79299	0.00115871	-2.93603	72654.1	10446.9	74990.2	10981.7	21036	4328.66	62207.2	0.14379	6.95458	0.842271
P09103|PDIA1_MOUSE	Protein disulfide-isomerase OS=Mus musculus OX=10090 GN=P4hb PE=1 SV=2	5.77944	0.0011729	-2.93074	362812	41060.1	385495	38237.6	110730	11671.9	321752	0.113172	8.83612	0.946262
Q9JIM1|S29A1_MOUSE	Equilibrative nucleoside transporter 1 OS=Mus musculus OX=10090 GN=Slc29a1 PE=1 SV=3	5.74796	0.00120665	-2.91842	14249	1340.88	14241.4	1355.18	4457.12	553.507	12908.1	0.0941034	10.6266	1.02639
Q61425|HCDH_MOUSE	Hydroxyacyl-coenzyme A dehydrogenase, mitochondrial OS=Mus musculus OX=10090 GN=Hadh PE=1 SV=2"	5.7375	0.00121811	-2.91431	97988.2	16884.1	99130	14691.9	27861.1	4800.3	81104.1	0.172308	5.80357	0.763695
Q9WVM8|AADAT_MOUSE	Kynurenine_alpha-aminoadipate aminotransferase, mitochondrial OS=Mus musculus OX=10090 GN=Aadat PE=1 SV=1"	5.72978	0.00122665	-2.91128	12001.6	2493.4	13239.2	2562.22	3272.7	551.682	9508.19	0.207756	4.81334	0.682447
Q8VDN2|AT1A1_MOUSE	Sodium_potassium-transporting ATPase subunit alpha-1 OS=Mus musculus OX=10090 GN=Atp1a1 PE=1 SV=1	5.70863	0.00125037	-2.90296	141974	14772.3	144485	11648.7	43889	7731.02	127202	0.104049	9.61082	0.982761
Q8QZR3|EST2A_MOUSE	Pyrethroid hydrolase Ces2a OS=Mus musculus OX=10090 GN=Ces2a PE=1 SV=1	5.67141	0.00129344	-2.88825	248670	19238.5	269540	16772.6	80261.1	10212.1	229432	0.0773655	12.9257	1.11145
Q9Z2I9|SUCB1_MOUSE	Succinate--CoA ligase [ADP-forming] subunit beta, mitochondrial OS=Mus musculus OX=10090 GN=Sucla2 PE=1 SV=2"	5.6624	0.00130411	-2.88469	25338.4	4700.43	26279	5026.36	7208.58	1082.9	20637.9	0.185506	5.39065	0.731641
P32261|ANT3_MOUSE	Antithrombin-III OS=Mus musculus OX=10090 GN=Serpinc1 PE=1 SV=1	5.64104	0.00132982	-2.87621	33180	2618.41	33965.1	1935.71	10682	1816.81	30561.6	0.0789154	12.6718	1.10284
P61804|DAD1_MOUSE	Dolichyl-diphosphooligosaccharide--protein glycosyltransferase subunit DAD1 OS=Mus musculus OX=10090 GN=Dad1 PE=1 SV=3	5.63878	0.00133257	-2.87531	35734.9	4437.76	37281.8	4493.88	10985	1598.5	31297.1	0.124186	8.05245	0.905928
Q62425|NDUA4_MOUSE	Cytochrome c oxidase subunit NDUFA4 OS=Mus musculus OX=10090 GN=Ndufa4 PE=1 SV=2	5.61727	0.00135911	-2.86674	22143.5	6142.55	22553.4	6105.58	5613.91	969.839	16001	0.277397	3.60494	0.556899
Q61490|CD166_MOUSE	CD166 antigen OS=Mus musculus OX=10090 GN=Alcam PE=1 SV=3	5.58439	0.00140087	-2.8536	3584.97	505.462	3638.98	569.427	1071.17	262.65	3079.51	0.140995	7.09245	0.850797
Q60759|GCDH_MOUSE	Glutaryl-CoA dehydrogenase, mitochondrial OS=Mus musculus OX=10090 GN=Gcdh PE=1 SV=2"	5.56392	0.00142759	-2.8454	37449.5	8498.67	34742.6	7885.55	9963.02	3006.07	28950.9	0.226937	4.40652	0.644095
Q9DC50|OCTC_MOUSE	Peroxisomal carnitine O-octanoyltransferase OS=Mus musculus OX=10090 GN=Crot PE=1 SV=1	-5.5327	0.00146948	-2.83284	16872.1	200890	17671.5	188175	5659.36	66278.9	-184018	11.9067	0.0839866	-1.07579
P00186|CP1A2_MOUSE	Cytochrome P450 1A2 OS=Mus musculus OX=10090 GN=Cyp1a2 PE=1 SV=1	5.49884	0.00151651	-2.81916	43962.3	5895.17	45967	6255.1	13501.8	3066.07	38067.2	0.134096	7.45735	0.872585
P37040|NCPR_MOUSE	NADPH--cytochrome P450 reductase OS=Mus musculus OX=10090 GN=Por PE=1 SV=2	5.49163	0.00152674	-2.81624	189735	26809.7	202950	30053.9	58615.9	9215.43	162925	0.141301	7.0771	0.849856
P24456|CP2DA_MOUSE	Cytochrome P450 2D10 OS=Mus musculus OX=10090 GN=Cyp2d10 PE=1 SV=2	5.48021	0.00154311	-2.8116	176472	35569	180015	38502	50236.1	10982.7	140903	0.201556	4.96141	0.695605
Q8BK48|EST2E_MOUSE	Pyrethroid hydrolase Ces2e OS=Mus musculus OX=10090 GN=Ces2e PE=1 SV=1	5.45608	0.00157836	-2.80179	36116.3	2876.34	38952.5	2468.44	12118.6	1266.27	33240	0.0796409	12.5564	1.09886
P21614|VTDB_MOUSE	Vitamin D-binding protein OS=Mus musculus OX=10090 GN=Gc PE=1 SV=2	5.45062	0.00158647	-2.79957	40799.4	2797.35	36968.8	2255.12	13683.4	2684.09	38002	0.0685635	14.585	1.16391
Q9D0F3|LMAN1_MOUSE	Protein ERGIC-53 OS=Mus musculus OX=10090 GN=Lman1 PE=1 SV=1	5.43198	0.00161449	-2.79196	86739.8	9076.94	89325.2	7530.28	28366.5	3605.09	77662.9	0.104646	9.55606	0.980279
Q811D0|DLG1_MOUSE	Disks large homolog 1 OS=Mus musculus OX=10090 GN=Dlg1 PE=1 SV=1	5.42499	0.00162514	-2.78911	5800.65	622.208	5760.83	491.151	1866.61	400.571	5178.44	0.107265	9.32269	0.969541
P50285|FMO1_MOUSE	Dimethylaniline monooxygenase [N-oxide-forming] 1 OS=Mus musculus OX=10090 GN=Fmo1 PE=1 SV=1	5.42072	0.00163169	-2.78736	97384.3	15609.4	103275	18090.6	29295.9	7214.77	81774.9	0.160286	6.23883	0.795103
P16332|MUTA_MOUSE	Methylmalonyl-CoA mutase, mitochondrial OS=Mus musculus OX=10090 GN=Mmut PE=1 SV=2"	5.40337	0.00165859	-2.78026	8173.19	2295.3	7682.42	1896.76	1646.41	1422.22	5877.88	0.280833	3.56083	0.551551
Q9QYR7|ACOT3_MOUSE	Acyl-coenzyme A thioesterase 3 OS=Mus musculus OX=10090 GN=Acot3 PE=1 SV=1	-5.40033	0.00166336	-2.77901	3805.32	20324.8	4240.6	19139.7	1626.97	5897.63	-16519.4	5.34114	0.187226	-0.727634
Q8QZT1|THIL_MOUSE	Acetyl-CoA acetyltransferase, mitochondrial OS=Mus musculus OX=10090 GN=Acat1 PE=1 SV=1"	5.39118	0.00167781	-2.77526	72137.8	9228.47	71072.9	9823.55	23219	2352.83	62909.4	0.127928	7.81688	0.893033
Q8BXB6|SO2B1_MOUSE	Solute carrier organic anion transporter family member 2B1 OS=Mus musculus OX=10090 GN=Slco2b1 PE=1 SV=1	5.37467	0.00170424	-2.76847	9126.34	881.235	8217.03	833.157	3021.74	531.523	8245.1	0.0965596	10.3563	1.0152
Q9Z2Z6|MCAT_MOUSE	Mitochondrial carnitine_acylcarnitine carrier protein OS=Mus musculus OX=10090 GN=Slc25a20 PE=1 SV=1	5.37127	0.00170974	-2.76707	24073.8	8513.15	24993.9	8158.31	5427.37	2028.4	15560.7	0.353627	2.82784	0.451454
P13707|GPDA_MOUSE	Glycerol-3-phosphate dehydrogenase [NAD(+)], cytoplasmic OS=Mus musculus OX=10090 GN=Gpd1 PE=1 SV=3"	-5.36007	0.001728	-2.76246	7668.69	128689	6969.46	115595	3727.39	45002.2	-121021	16.7811	0.0595907	-1.22482
Q78XF5|OSTC_MOUSE	Oligosaccharyltransferase complex subunit OSTC OS=Mus musculus OX=10090 GN=Ostc PE=1 SV=1	5.35538	0.00173572	-2.76052	18564.6	2306.92	20522.3	2563.24	5982.36	1036.81	16257.7	0.124264	8.04736	0.905653
P63038|CH60_MOUSE	60 kDa heat shock protein, mitochondrial OS=Mus musculus OX=10090 GN=Hspd1 PE=1 SV=1"	5.35329	0.00173916	-2.75966	139689	26304.1	136760	27258	41981.2	5659.36	113385	0.188304	5.31055	0.725139
P35979|RL12_MOUSE	60S ribosomal protein L12 OS=Mus musculus OX=10090 GN=Rpl12 PE=1 SV=2	5.35172	0.00174177	-2.75901	68121.6	9059.61	77992.5	10251.2	21872.8	2960.24	59062	0.132992	7.51927	0.876175
O08705|NTCP_MOUSE	Sodium_bile acid cotransporter OS=Mus musculus OX=10090 GN=Slc10a1 PE=1 SV=1	5.34334	0.00175569	-2.75555	16087.6	858.085	17452.8	1047.17	5669.93	588.261	15229.5	0.0533383	18.7483	1.27296
P05202|AATM_MOUSE	Aspartate aminotransferase, mitochondrial OS=Mus musculus OX=10090 GN=Got2 PE=1 SV=1"	5.32596	0.00178501	-2.74836	126763	29159.9	125940	29185.4	36266.8	5299.01	97603.1	0.230035	4.34717	0.638207
P23953|EST1C_MOUSE	Carboxylesterase 1C OS=Mus musculus OX=10090 GN=Ces1c PE=1 SV=4	5.32453	0.00178744	-2.74777	17116.4	1738.44	18382.6	1578.01	5666.21	1122.12	15377.9	0.101566	9.84579	0.993251
Q922Q8|LRC59_MOUSE	Leucine-rich repeat-containing protein 59 OS=Mus musculus OX=10090 GN=Lrrc59 PE=1 SV=1	5.32277	0.00179044	-2.74704	141469	11068.5	152765	10425.7	48815.1	4221.95	130401	0.0782394	12.7813	1.10657
P56657|CP240_MOUSE	Cytochrome P450 2C40 OS=Mus musculus OX=10090 GN=Cyp2c40 PE=1 SV=2	5.31872	0.00179738	-2.74536	282440	31303.3	299755	32787.4	94243.3	6014.83	251137	0.110832	9.02268	0.955336
Q8VDD5|MYH9_MOUSE	Myosin-9 OS=Mus musculus OX=10090 GN=Myh9 PE=1 SV=4	5.3003	0.0018293	-2.73772	76733.5	4852.46	86327.2	3712.41	26867.8	3714.8	71881	0.0632378	15.8133	1.19902
P70245|EBP_MOUSE	3-beta-hydroxysteroid-Delta(8),Delta(7)-isomerase OS=Mus musculus OX=10090 GN=Ebp PE=1 SV=3"	5.28148	0.00186257	-2.72989	97307.5	7481.5	108780	8593.19	33658.3	4916.41	89826	0.0768851	13.0064	1.11416
Q8VCU1|EST3B_MOUSE	Carboxylesterase 3B OS=Mus musculus OX=10090 GN=Ces3b PE=1 SV=2	5.26424	0.00189367	-2.7227	87276.5	5072.81	88208.2	4639.26	31206.7	1231.96	82203.7	0.0581235	17.2048	1.23565
Q8CFX1|G6PE_MOUSE	GDH_6PGL endoplasmic bifunctional protein OS=Mus musculus OX=10090 GN=H6pd PE=1 SV=2	5.2397	0.00193896	-2.71243	23819.7	2508.37	24983.2	2133.25	8010.59	1414.72	21311.3	0.105307	9.49607	0.977544
P26043|RADI_MOUSE	Radixin OS=Mus musculus OX=10090 GN=Rdx PE=1 SV=3	5.21576	0.00198431	-2.70239	56956.7	5077.73	56900.5	5841.47	19518.1	3844.51	51879	0.0891507	11.217	1.04988
P14246|GTR2_MOUSE	Solute carrier family 2, facilitated glucose transporter member 2 OS=Mus musculus OX=10090 GN=Slc2a2 PE=1 SV=3"	5.21573	0.00198436	-2.70238	41221.5	3011.99	40251.1	2706.3	14605.8	1157.25	38209.5	0.0730684	13.6858	1.13627
P12265|BGLR_MOUSE	Beta-glucuronidase OS=Mus musculus OX=10090 GN=Gusb PE=1 SV=2	5.20411	0.00200683	-2.69749	5957.14	632.809	5328.13	687.463	1983.62	502.196	5324.33	0.106227	9.41381	0.973765
Q78KK3|S22AI_MOUSE	Solute carrier family 22 member 18 OS=Mus musculus OX=10090 GN=Slc22a18 PE=1 SV=2	5.19856	0.00201765	-2.69515	5176.99	1092.76	5550.35	673.932	1143.01	1078.19	4084.23	0.21108	4.73754	0.675553
P19221|THRB_MOUSE	Prothrombin OS=Mus musculus OX=10090 GN=F2 PE=1 SV=1	5.18012	0.00205409	-2.68738	5600.14	300.691	6157.07	293.979	2030.44	252.43	5299.45	0.0536935	18.6242	1.27008
P62880|GBB2_MOUSE	Guanine nucleotide-binding protein G(I)_G(S)_G(T) subunit beta-2 OS=Mus musculus OX=10090 GN=Gnb2 PE=1 SV=3	5.16615	0.00208221	-2.68148	18510.4	1603.9	17260.7	1775.02	6473.05	968.556	16906.5	0.0866485	11.5409	1.06224
Q9NYQ2|HAOX2_MOUSE	Hydroxyacid oxidase 2 OS=Mus musculus OX=10090 GN=Hao2 PE=1 SV=1	-5.1661	0.00208231	-2.68145	1496.06	7467.09	1286.49	6758.38	738.949	2190.33	-5971.03	4.99117	0.200354	-0.698202
P04938|MUP11_MOUSE	Major urinary protein 11 OS=Mus musculus OX=10090 GN=Mup11 PE=1 SV=2	5.152	0.00211114	-2.67548	251960	30700.1	286640	30436.4	85470.3	8509.79	221260	0.121845	8.20715	0.914192
Q8JZZ0|UD3A2_MOUSE	UDP-glucuronosyltransferase 3A2 OS=Mus musculus OX=10090 GN=Ugt3a2 PE=1 SV=2	5.14269	0.00213041	-2.67154	103199	10994.8	109679	9172.42	35467.9	5276.92	92204	0.10654	9.38611	0.972486
Q6P5E4|UGGG1_MOUSE	UDP-glucose:glycoprotein glucosyltransferase 1 OS=Mus musculus OX=10090 GN=Uggt1 PE=1 SV=4	5.13686	0.00214258	-2.66906	9482.8	961.369	10839.7	1004.59	3189.78	912.579	8521.43	0.10138	9.86385	0.994047
Q80XL6|ACD11_MOUSE	Acyl-CoA dehydrogenase family member 11 OS=Mus musculus OX=10090 GN=Acad11 PE=1 SV=2	-5.10034	0.00222067	-2.65352	120506	828832	112051	873550	20563.1	276995	-708327	6.87796	0.145392	-0.83746
Q05117|PPA5_MOUSE	Tartrate-resistant acid phosphatase type 5 OS=Mus musculus OX=10090 GN=Acp5 PE=1 SV=2	5.09598	0.0022302	-2.65166	2142.96	458.557	2120.47	541.007	564.958	343.273	1684.4	0.213983	4.67326	0.66962
P51174|ACADL_MOUSE	Long-chain specific acyl-CoA dehydrogenase, mitochondrial OS=Mus musculus OX=10090 GN=Acadl PE=1 SV=2"	5.09291	0.00223693	-2.65035	28713.7	5613.42	31206.8	5196.37	8974.57	1322.8	23100.3	0.195496	5.11519	0.708862
Q9CQQ7|AT5F1_MOUSE	ATP synthase F(0) complex subunit B1, mitochondrial OS=Mus musculus OX=10090 GN=Atp5pb PE=1 SV=1"	5.07482	0.00227715	-2.64261	62772.7	15340	55625	15679.2	17779.7	5772.66	47432.7	0.244374	4.09209	0.611945
Q64435|UD16_MOUSE	UDP-glucuronosyltransferase 1-6 OS=Mus musculus OX=10090 GN=Ugt1a6 PE=1 SV=1	5.07256	0.00228221	-2.64164	23918.7	4381.11	26465.8	3413.94	7400.24	2139.33	19537.6	0.183166	5.45952	0.737154
Q9D3D9|ATPD_MOUSE	ATP synthase subunit delta, mitochondrial OS=Mus musculus OX=10090 GN=Atp5f1d PE=1 SV=1"	5.056	0.00231984	-2.63454	2782.11	238.958	2971.42	56.0252	920.137	406.661	2543.15	0.0858909	11.6427	1.06605
Q9CQH3|NDUB5_MOUSE	NADH dehydrogenase [ubiquinone] 1 beta subcomplex subunit 5, mitochondrial OS=Mus musculus OX=10090 GN=Ndufb5 PE=1 SV=1"	5.05176	0.00232957	-2.63272	7192.86	2078.57	7483.81	2355.03	1841.93	840.805	5114.29	0.288977	3.46049	0.539137
P14094|AT1B1_MOUSE	Sodium_potassium-transporting ATPase subunit beta-1 OS=Mus musculus OX=10090 GN=Atp1b1 PE=1 SV=1	5.04255	0.00235089	-2.62877	44464.3	4201.42	43180.6	4031.17	15895.8	1530.36	40262.9	0.0944896	10.5832	1.02462
Q8BSY0|ASPH_MOUSE	Aspartyl_asparaginyl beta-hydroxylase OS=Mus musculus OX=10090 GN=Asph PE=1 SV=1	5.03792	0.00236169	-2.62678	8662.63	646.89	7897.96	619.65	3165.01	329.931	8015.74	0.074676	13.3912	1.12682
O35465|FKBP8_MOUSE	Peptidyl-prolyl cis-trans isomerase FKBP8 OS=Mus musculus OX=10090 GN=Fkbp8 PE=1 SV=2	5.03781	0.00236195	-2.62673	2971.03	1151.57	3093.99	1010.12	508.79	512.72	1819.46	0.3876	2.57998	0.411616
O35459|ECH1_MOUSE	Delta(3,5)-Delta(2,4)-dienoyl-CoA isomerase, mitochondrial OS=Mus musculus OX=10090 GN=Ech1 PE=1 SV=1"	-5.03765	0.00236233	-2.62666	19273.4	70634.6	19860.3	76865	5419.23	19657.6	-51361.2	3.66488	0.27286	-0.56406
Q99MZ7|PECR_MOUSE	Peroxisomal trans-2-enoyl-CoA reductase OS=Mus musculus OX=10090 GN=Pecr PE=1 SV=1	-5.03578	0.00236672	-2.62585	76819.8	605652	82751.1	576230	12434	209662	-528833	7.88406	0.126838	-0.89675
Q9D1D4|TMEDA_MOUSE	Transmembrane emp24 domain-containing protein 10 OS=Mus musculus OX=10090 GN=Tmed10 PE=1 SV=1	5.02612	0.0023895	-2.62169	9558.69	2213.97	9218.26	2084.14	2826.15	744.711	7344.73	0.231618	4.31745	0.635227
O88908|SOAT2_MOUSE	Sterol O-acyltransferase 2 OS=Mus musculus OX=10090 GN=Soat2 PE=1 SV=2	5.01802	0.00240879	-2.6182	14625	2514.44	16351.4	2230.34	4674.55	1202.76	12110.5	0.171928	5.81639	0.764653
P80313|TCPH_MOUSE	T-complex protein 1 subunit eta OS=Mus musculus OX=10090 GN=Cct7 PE=1 SV=1	5.00663	0.00243621	-2.61328	27346.7	5021.85	27620.6	4609.96	8606.86	2335.48	22324.8	0.183637	5.44554	0.736041
P08226|APOE_MOUSE	Apolipoprotein E OS=Mus musculus OX=10090 GN=Apoe PE=1 SV=2	5.00036	0.00245146	-2.61058	174948	17490.3	191095	18061.9	62346.7	8898.4	157458	0.0999743	10.0026	1.00011
Q8BMS1|ECHA_MOUSE	Trifunctional enzyme subunit alpha, mitochondrial OS=Mus musculus OX=10090 GN=Hadha PE=1 SV=1"	4.99736	0.00245879	-2.60928	63775.6	17946.7	63469.1	15265.7	16787.5	7387.79	45828.8	0.281404	3.55361	0.550669
Q63886|UD11_MOUSE	UDP-glucuronosyltransferase 1A1 OS=Mus musculus OX=10090 GN=Ugt1a1 PE=1 SV=2	4.98628	0.0024861	-2.60448	490348	45060.2	526960	39772.8	177713	17824.2	445287	0.0918945	10.882	1.03671
P58252|EF2_MOUSE	Elongation factor 2 OS=Mus musculus OX=10090 GN=Eef2 PE=1 SV=2	4.97766	0.00250758	-2.60075	107972	21828.8	113999	22768.6	34246.1	5018.47	86143.1	0.202171	4.9463	0.694281
O09174|AMACR_MOUSE	Alpha-methylacyl-CoA racemase OS=Mus musculus OX=10090 GN=Amacr PE=1 SV=4	-4.97439	0.00251578	-2.59933	24352.1	224678	22318.2	197705	7556.9	80187.3	-200325	9.2262	0.108387	-0.965023
P54071|IDHP_MOUSE	Isocitrate dehydrogenase [NADP], mitochondrial OS=Mus musculus OX=10090 GN=Idh2 PE=1 SV=3"	4.95857	0.00255591	-2.59245	40461.8	2661.27	42291.2	2991.01	15121.4	1949.49	37800.5	0.0657724	15.2039	1.18196
Q8CIM7|CP2DQ_MOUSE	Cytochrome P450 2D26 OS=Mus musculus OX=10090 GN=Cyp2d26 PE=1 SV=1	4.95326	0.00256954	-2.59014	108322	27315.9	115508	28567.7	30847.6	10874.4	81006.2	0.252173	3.96554	0.598302
Q8VCT4|EST1D_MOUSE	Carboxylesterase 1D OS=Mus musculus OX=10090 GN=Ces1d PE=1 SV=1	4.94257	0.00259723	-2.58549	887820	77293.5	876030	78445.5	327691	13725.5	810527	0.0870598	11.4864	1.06018
Q5BL07|PEX1_MOUSE	Peroxisome biogenesis factor 1 OS=Mus musculus OX=10090 GN=Pex1 PE=1 SV=2	-4.94252	0.00259737	-2.58547	11313.1	75506.1	11677.1	73189	1985.23	25899.9	-64193.1	6.67425	0.14983	-0.824402
Q91W90|TXND5_MOUSE	Thioredoxin domain-containing protein 5 OS=Mus musculus OX=10090 GN=Txndc5 PE=1 SV=2	4.91571	0.00266829	-2.57377	32097.9	2075.01	32595.4	2061.84	12206.8	450.382	30022.9	0.0646462	15.4688	1.18946
P51658|DHB2_MOUSE	Estradiol 17-beta-dehydrogenase 2 OS=Mus musculus OX=10090 GN=Hsd17b2 PE=1 SV=2	4.90412	0.00269965	-2.56869	58816.9	7257.29	59147	7973.12	20957.8	1705.64	51559.7	0.123388	8.10453	0.908728
O88455|DHCR7_MOUSE	7-dehydrocholesterol reductase OS=Mus musculus OX=10090 GN=Dhcr7 PE=1 SV=1	4.89531	0.00272376	-2.56483	45461.3	4047.52	48492	4639.03	16799.6	2013.63	41413.8	0.0890322	11.2319	1.05045
E9Q5K4|CP2CN_MOUSE	Cytochrome P450 2C44 OS=Mus musculus OX=10090 GN=Cyp2c23 PE=1 SV=1	4.8817	0.00276147	-2.55886	14365.1	2011.94	14205.2	1593.91	4886.2	1318.6	12353.1	0.140058	7.13992	0.853693
Q8VCM7|FIBG_MOUSE	Fibrinogen gamma chain OS=Mus musculus OX=10090 GN=Fgg PE=1 SV=1	4.83915	0.00288328	-2.54011	11839.7	1089.96	13493.6	1117.2	4353.65	885.569	10749.7	0.0920601	10.8625	1.03593
P01901|HA1B_MOUSE	H-2 class I histocompatibility antigen, K-B alpha chain OS=Mus musculus OX=10090 GN=H2-K1 PE=1 SV=1"	4.8374	0.00288843	-2.53934	51467.6	4258.43	54192.6	3618.82	19290.8	2971.94	47209.1	0.0827402	12.086	1.08228
Q9CRC0|VKOR1_MOUSE	Vitamin K epoxide reductase complex subunit 1 OS=Mus musculus OX=10090 GN=Vkorc1 PE=1 SV=1	4.83477	0.00289617	-2.53818	10918.5	746.351	11202.1	547.862	4105.94	920.751	10172.1	0.0683566	14.6292	1.16522
Q91VR2|ATPG_MOUSE	ATP synthase subunit gamma, mitochondrial OS=Mus musculus OX=10090 GN=Atp5f1c PE=1 SV=1"	4.80722	0.00297868	-2.52598	23323.3	9663.56	23696.4	8347.39	4655.21	3259.7	13659.7	0.414331	2.41353	0.382653
Q8BU14|SEC62_MOUSE	Translocation protein SEC62 OS=Mus musculus OX=10090 GN=Sec62 PE=1 SV=1	4.80653	0.00298078	-2.52567	4699.63	469.786	4686.32	384.871	1697.88	463.606	4229.84	0.0999623	10.0038	1.00016
Q9JHI5|IVD_MOUSE	Isovaleryl-CoA dehydrogenase, mitochondrial OS=Mus musculus OX=10090 GN=Ivd PE=1 SV=1"	4.79328	0.00302143	-2.51979	54193.8	13353.9	55903.4	13708.4	16296.3	4980.74	40839.9	0.246409	4.05829	0.608343
Q9D051|ODPB_MOUSE	Pyruvate dehydrogenase E1 component subunit beta, mitochondrial OS=Mus musculus OX=10090 GN=Pdhb PE=1 SV=1"	4.78575	0.00304484	-2.51644	2302.68	778.475	2373.64	758.725	581.079	260.935	1524.21	0.338073	2.95794	0.470989
Q9EQ20|MMSA_MOUSE	Methylmalonate-semialdehyde dehydrogenase [acylating], mitochondrial OS=Mus musculus OX=10090 GN=Aldh6a1 PE=1 SV=1"	4.78024	0.00306208	-2.51398	54020.5	11457.5	47453.3	11580.8	17681.2	2120.56	42563	0.212095	4.71487	0.67347
P18572|BASI_MOUSE	Basigin OS=Mus musculus OX=10090 GN=Bsg PE=1 SV=2	4.77657	0.00307365	-2.51235	30416.4	2894.08	32038.4	3087.99	11478	1027.98	27522.4	0.0951485	10.5099	1.0216
P07758|A1AT1_MOUSE	Alpha-1-antitrypsin 1-1 OS=Mus musculus OX=10090 GN=Serpina1a PE=1 SV=4	4.76032	0.00312535	-2.5051	10573.8	1328.62	11110.3	998.957	3652.08	1322.87	9245.22	0.125651	7.95854	0.900833
Q99LB2|DHRS4_MOUSE	Dehydrogenase_reductase SDR family member 4 OS=Mus musculus OX=10090 GN=Dhrs4 PE=1 SV=3	-4.74892	0.00316225	-2.5	57940	419100	55717.5	383180	6301.02	151971	-361160	7.23335	0.138249	-0.859339
O35386|PAHX_MOUSE	Phytanoyl-CoA dioxygenase, peroxisomal OS=Mus musculus OX=10090 GN=Phyh PE=1 SV=1"	-4.74367	0.00317938	-2.49766	14002.7	155662	15496.3	156150	4081.14	59585.9	-141659	11.1166	0.0899556	-1.04597
P47738|ALDH2_MOUSE	Aldehyde dehydrogenase, mitochondrial OS=Mus musculus OX=10090 GN=Aldh2 PE=1 SV=1"	4.73458	0.00320933	-2.49359	182472	60711.2	168570	55475.4	47435.2	19885.5	121761	0.332715	3.00558	0.477928
P28843|DPP4_MOUSE	Dipeptidyl peptidase 4 OS=Mus musculus OX=10090 GN=Dpp4 PE=1 SV=3	4.73379	0.00321194	-2.49323	38775.8	7389.12	38072.2	6981.01	12903	3059.05	31386.6	0.19056	5.24768	0.719968
Q9JJL3|SO1B2_MOUSE	Solute carrier organic anion transporter family member 1B2 OS=Mus musculus OX=10090 GN=Slco1b2 PE=1 SV=1	4.7311	0.00322088	-2.49203	25912.3	2154	28736.6	2072.86	9978.59	1139.85	23758.3	0.0831264	12.0299	1.08026
Q9D0M3|CY1_MOUSE	Cytochrome c1, heme protein, mitochondrial OS=Mus musculus OX=10090 GN=Cyc1 PE=1 SV=1"	4.71647	0.00326994	-2.48546	60627.7	16927.2	60987.4	17512	18243.2	3253.58	43700.5	0.279198	3.58168	0.554087
Q64458|CP2CT_MOUSE	Cytochrome P450 2C29 OS=Mus musculus OX=10090 GN=Cyp2c29 PE=1 SV=2	4.71103	0.00328836	-2.48302	135474	13933.5	145607	14321.9	50853.2	8736.65	121540	0.10285	9.72292	0.987797
O35129|PHB2_MOUSE	Prohibitin-2 OS=Mus musculus OX=10090 GN=Phb2 PE=1 SV=1	4.65712	0.00347778	-2.4587	33162.8	14521.9	31931.1	16288.5	6704.23	4374.72	18640.8	0.437899	2.28363	0.358626
Q62087|PON3_MOUSE	Serum paraoxonase_lactonase 3 OS=Mus musculus OX=10090 GN=Pon3 PE=1 SV=2	4.64888	0.0035078	-2.45497	30314.3	799.649	33790.6	810.045	12693.5	321.314	29514.7	0.0263786	37.9095	1.57875
Q9JLJ2|AL9A1_MOUSE	4-trimethylaminobutyraldehyde dehydrogenase OS=Mus musculus OX=10090 GN=Aldh9a1 PE=1 SV=1	4.61547	0.00363256	-2.43979	3777.35	854.529	3990.32	954.192	1220.52	338.272	2922.82	0.226225	4.42039	0.64546
Q8R0N6|HOT_MOUSE	Hydroxyacid-oxoacid transhydrogenase, mitochondrial OS=Mus musculus OX=10090 GN=Adhfe1 PE=1 SV=2"	4.61539	0.00363287	-2.43975	2616.67	694.091	2577.79	716.035	625.198	550.649	1922.58	0.265257	3.76993	0.576333
Q8K297|GT251_MOUSE	Procollagen galactosyltransferase 1 OS=Mus musculus OX=10090 GN=Colgalt1 PE=1 SV=2	4.61106	0.00364941	-2.43778	5382.18	435.968	5342.64	179.86	2043.11	654.472	4946.21	0.0810021	12.3454	1.0915
Q60932|VDAC1_MOUSE	Voltage-dependent anion-selective channel protein 1 OS=Mus musculus OX=10090 GN=Vdac1 PE=1 SV=3	4.60565	0.00367019	-2.43531	32613.3	9761.12	36262.3	10408.5	8408.53	5270.04	22852.2	0.299299	3.34114	0.523895
Q61838|PZP_MOUSE	Pregnancy zone protein OS=Mus musculus OX=10090 GN=Pzp PE=1 SV=3	4.60434	0.00367525	-2.43471	11013.5	455.467	11560.4	499.869	4576.94	290.255	10558.1	0.0413553	24.1807	1.38347
P08249|MDHM_MOUSE	Malate dehydrogenase, mitochondrial OS=Mus musculus OX=10090 GN=Mdh2 PE=1 SV=3"	4.60204	0.00368412	-2.43367	61954.3	8057.32	64443.4	6017.52	22673.6	5877.98	53897	0.130053	7.6892	0.885881
Q8BWT1|THIM_MOUSE	3-ketoacyl-CoA thiolase, mitochondrial OS=Mus musculus OX=10090 GN=Acaa2 PE=1 SV=3"	4.57951	0.00377248	-2.42337	236245	44572.9	227630	42202.9	82936.4	11344.2	191672	0.188672	5.30019	0.724291
Q921H8|THIKA_MOUSE	3-ketoacyl-CoA thiolase A, peroxisomal OS=Mus musculus OX=10090 GN=Acaa1a PE=1 SV=1"	-4.57041	0.00380885	-2.41921	19441.9	195129	21875.6	186740	9074.41	76342.9	-175687	10.0365	0.0996363	-1.00158
P47754|CAZA2_MOUSE	F-actin-capping protein subunit alpha-2 OS=Mus musculus OX=10090 GN=Capza2 PE=1 SV=3	4.55976	0.00385189	-2.41433	6053.76	1407.61	5684.44	1427.48	1875.37	797.494	4646.15	0.232517	4.30075	0.633544
P20852|CP2A5_MOUSE	Cytochrome P450 2A5 OS=Mus musculus OX=10090 GN=Cyp2a5 PE=2 SV=1	4.53667	0.00394715	-2.40372	51104.2	6487.28	55940.8	6056.98	19577.3	1902.22	44617	0.126942	7.87761	0.896394
P17717|UDB17_MOUSE	UDP-glucuronosyltransferase 2B17 OS=Mus musculus OX=10090 GN=Ugt2b17 PE=1 SV=1	4.53376	0.00395934	-2.40238	352838	57611.2	349820	53756.7	129420	14543.2	295226	0.16328	6.12446	0.787068
Q9DCW4|ETFB_MOUSE	Electron transfer flavoprotein subunit beta OS=Mus musculus OX=10090 GN=Etfb PE=1 SV=3	4.52999	0.0039752	-2.40064	87757.8	21865	77501.9	18540.2	27669.8	8984.28	65892.8	0.249152	4.01362	0.603536
Q9CQY5|MAGT1_MOUSE	Magnesium transporter protein 1 OS=Mus musculus OX=10090 GN=Magt1 PE=1 SV=1	4.52461	0.00399797	-2.39816	18084.2	6628.36	18064.1	6246.35	4573.85	2172.96	11455.8	0.366528	2.7283	0.435892
P42932|TCPQ_MOUSE	T-complex protein 1 subunit theta OS=Mus musculus OX=10090 GN=Cct8 PE=1 SV=3	4.52165	0.00401052	-2.3968	27344.8	2644.74	22671.1	2968.61	10843.4	1334.4	24700	0.0967185	10.3393	1.01449
P27786|CP17A_MOUSE	Steroid 17-alpha-hydroxylase_17,20 lyase OS=Mus musculus OX=10090 GN=Cyp17a1 PE=1 SV=1"	4.51578	0.00403563	-2.39409	17706.1	2370.91	17078.6	2556.99	6462.37	2089.61	15335.2	0.133904	7.46803	0.873206
P18760|COF1_MOUSE	Cofilin-1 OS=Mus musculus OX=10090 GN=Cfl1 PE=1 SV=3	4.50482	0.00408295	-2.38903	33791.3	2646.78	36763.5	2172.89	13760.2	1360.03	31144.5	0.0783274	12.7669	1.10609
Q8BWN8|ACOT4_MOUSE	Peroxisomal succinyl-coenzyme A thioesterase OS=Mus musculus OX=10090 GN=Acot4 PE=1 SV=1	-4.50047	0.00410186	-2.38702	27602.6	209918	25254.8	189790	8899.95	80530.2	-182315	7.605	0.131492	-0.881099
Q6GQT9|NOMO1_MOUSE	Nodal modulator 1 OS=Mus musculus OX=10090 GN=Nomo1 PE=1 SV=1	4.49931	0.00410696	-2.38648	25249.8	3197.2	27148.5	3274.28	9628.22	1841.21	22052.6	0.126622	7.89749	0.897489
Q9DBM2|ECHP_MOUSE	Peroxisomal bifunctional enzyme OS=Mus musculus OX=10090 GN=Ehhadh PE=1 SV=4	-4.48368	0.00417596	-2.37924	410880	3919075	418060	3923150	74337.3	1.56311e+06	-3508195	9.53825	0.104841	-0.979469
Q9WUU7|CATZ_MOUSE	Cathepsin Z OS=Mus musculus OX=10090 GN=Ctsz PE=1 SV=1	4.47588	0.00421087	-2.37563	10097.6	2138.51	10181.1	2449.71	3334.45	1236.83	7959.13	0.211783	4.72181	0.674109
Q9WU19|HAOX1_MOUSE	Hydroxyacid oxidase 1 OS=Mus musculus OX=10090 GN=Hao1 PE=1 SV=1	-4.47564	0.00421195	-2.37552	11950.5	106177	11678.1	99215.5	3085.73	41993.1	-94226.5	8.88473	0.112553	-0.948644
P25688|URIC_MOUSE	Uricase OS=Mus musculus OX=10090 GN=Uox PE=1 SV=2	-4.46136	0.00427679	-2.36888	423022	2357225	427220	2184650	37616.6	866275	-1.9342e+06	5.57234	0.179458	-0.746038
Q9JIZ0|CMLO1_MOUSE	Probable N-acetyltransferase CML1 OS=Mus musculus OX=10090 GN=Cml1 PE=1 SV=1	4.46064	0.0042801	-2.36855	39771.2	1523.48	46493.1	1600.85	17111.5	1133.45	38247.7	0.0383061	26.1055	1.41673
Q9DCT2|NDUS3_MOUSE	NADH dehydrogenase [ubiquinone] iron-sulfur protein 3, mitochondrial OS=Mus musculus OX=10090 GN=Ndufs3 PE=1 SV=2"	4.43623	0.00439358	-2.35718	12550.8	5029.75	11812.6	4772.32	2618.26	2154.49	7521.05	0.400751	2.49531	0.397125
P57759|ERP29_MOUSE	Endoplasmic reticulum resident protein 29 OS=Mus musculus OX=10090 GN=Erp29 PE=1 SV=2	4.40836	0.00452734	-2.34416	18616.9	3428.86	19870.9	3355.6	6646.72	1816.92	15188.1	0.18418	5.42949	0.734759
Q64310|SURF4_MOUSE	Surfeit locus protein 4 OS=Mus musculus OX=10090 GN=Surf4 PE=1 SV=1	4.40132	0.00456189	-2.34086	9879.12	3339.6	10636.1	3379.3	2281.45	1904.08	6539.52	0.338046	2.95817	0.471024
Q91X34|BAAT_MOUSE	Bile acid-CoA:amino acid N-acyltransferase OS=Mus musculus OX=10090 GN=Baat PE=1 SV=1	-4.39154	0.00461032	-2.33627	6562.58	112720	6373.12	108515	1719.65	48315.6	-106157	17.1761	0.0582205	-1.23492
Q9DCX2|ATP5H_MOUSE	ATP synthase subunit d, mitochondrial OS=Mus musculus OX=10090 GN=Atp5pd PE=1 SV=3"	4.38393	0.0046484	-2.3327	22860.2	7662.47	21708.6	7745.05	6907.28	600.791	15197.7	0.335189	2.98339	0.47471
P62889|RL30_MOUSE	60S ribosomal protein L30 OS=Mus musculus OX=10090 GN=Rpl30 PE=1 SV=2	4.37956	0.00467045	-2.33064	24777.5	5798.62	26343.3	5173.83	8319.7	2429.01	18978.9	0.234028	4.273	0.630733
P07759|SPA3K_MOUSE	Serine protease inhibitor A3K OS=Mus musculus OX=10090 GN=Serpina3k PE=1 SV=2	4.37083	0.00471481	-2.32654	7566.63	1785.42	8044.14	1007.49	1875.91	1865.19	5781.21	0.235959	4.23802	0.627163
P97872|FMO5_MOUSE	Flavin-containing monooxygenase 5 OS=Mus musculus OX=10090 GN=Fmo5 PE=1 SV=4	4.36693	0.00473479	-2.3247	199382	26717.5	188045	29510.5	78572.6	8930.78	172665	0.134001	7.4626	0.87289
Q2TPA8|HSDL2_MOUSE	Hydroxysteroid dehydrogenase-like protein 2 OS=Mus musculus OX=10090 GN=Hsdl2 PE=1 SV=1	-4.36033	0.00476877	-2.32159	8160.96	41612.1	9382.24	41291.8	2779.62	15089.5	-33451.2	5.09892	0.19612	-0.707479
Q9WV68|DECR2_MOUSE	Peroxisomal 2,4-dienoyl-CoA reductase [(3E)-enoyl-CoA-producing] OS=Mus musculus OX=10090 GN=Decr2 PE=1 SV=1"	-4.34562	0.0048456	-2.31465	121466	886945	122302	845105	24566.3	351441	-765479	7.30199	0.136949	-0.863441
Q9DB20|ATPO_MOUSE	ATP synthase subunit O, mitochondrial OS=Mus musculus OX=10090 GN=Atp5po PE=1 SV=1"	4.3433	0.00485782	-2.31356	108344	30997.8	117441	32011.9	34953.2	6839.97	77345.9	0.286106	3.49521	0.543473
Q9EQH2|ERAP1_MOUSE	Endoplasmic reticulum aminopeptidase 1 OS=Mus musculus OX=10090 GN=Erap1 PE=1 SV=2	4.33955	0.00487767	-2.31179	26088.3	5296.27	26308.9	4778.23	8974.44	3359.27	20792	0.203014	4.92578	0.692475
P11589|MUP2_MOUSE	Major urinary protein 2 OS=Mus musculus OX=10090 GN=Mup2 PE=1 SV=1	4.33789	0.00488649	-2.311	81776	12835.3	90663	12795.1	31778.7	647.268	68940.7	0.156957	6.37116	0.804219
Q9CRB3|HIUH_MOUSE	5-hydroxyisourate hydrolase OS=Mus musculus OX=10090 GN=Urah PE=1 SV=1	-4.3365	0.0048939	-2.31034	16805.6	208156	19703.5	192230	8888.8	87802.1	-191350	12.3861	0.0807358	-1.09293
A2AS89|SPEB_MOUSE	Agmatinase, mitochondrial OS=Mus musculus OX=10090 GN=Agmat PE=1 SV=1"	4.32691	0.00494529	-2.30581	5880.7	2287.24	5721.55	2293.28	1659.66	66.2079	3593.46	0.38894	2.57109	0.410117
Q8BGI5|PEX26_MOUSE	Peroxisome assembly protein 26 OS=Mus musculus OX=10090 GN=Pex26 PE=1 SV=2	-4.32537	0.00495359	-2.30508	1853.16	10523.2	1764.41	10623.2	743.843	3939.33	-8670.08	5.67853	0.176102	-0.754236
P06802|ENPP1_MOUSE	Ectonucleotide pyrophosphatase_phosphodiesterase family member 1 OS=Mus musculus OX=10090 GN=Enpp1 PE=1 SV=4	4.32503	0.00495544	-2.30492	1098.08	59.9344	1069.96	0	464.856	119.869	1038.14	0.0545813	18.3213	1.26296
P07724|ALBU_MOUSE	Albumin OS=Mus musculus OX=10090 GN=Alb PE=1 SV=3	4.32177	0.00497312	-2.30337	209962	22103.2	209555	9960.39	82495.8	27429.4	187859	0.105272	9.49918	0.977686
P52196|THTR_MOUSE	Thiosulfate sulfurtransferase OS=Mus musculus OX=10090 GN=Tst PE=1 SV=3	4.30929	0.00504133	-2.29745	80452.8	12838.5	77243.5	9927.31	30169.5	8634.42	67614.3	0.159579	6.26651	0.797025
P35980|RL18_MOUSE	60S ribosomal protein L18 OS=Mus musculus OX=10090 GN=Rpl18 PE=1 SV=3	4.30214	0.00508089	-2.29406	80744.4	8535.54	85051.8	8536.91	32979.7	6261.32	72208.8	0.105711	9.45978	0.975881
P50171|DHB8_MOUSE	Estradiol 17-beta-dehydrogenase 8 OS=Mus musculus OX=10090 GN=Hsd17b8 PE=1 SV=2	4.29717	0.00510857	-2.2917	5824.58	2091.12	5611.6	2027.88	1473.07	921.658	3733.47	0.359016	2.78539	0.444887
Q64464|CP3AD_MOUSE	Cytochrome P450 3A13 OS=Mus musculus OX=10090 GN=Cyp3a13 PE=1 SV=1	4.29022	0.00514762	-2.28839	81537	18032.6	83556.3	18553.5	29115.3	5358.15	63504.4	0.221158	4.52165	0.655297
Q9CY50|SSRA_MOUSE	Translocon-associated protein subunit alpha OS=Mus musculus OX=10090 GN=Ssr1 PE=1 SV=1	4.28291	0.00518902	-2.28491	48655.6	4471.19	50851.9	4592.89	20504.1	2301.61	44184.4	0.0918947	10.882	1.03671
Q64459|CP3AB_MOUSE	Cytochrome P450 3A11 OS=Mus musculus OX=10090 GN=Cyp3a11 PE=1 SV=1	4.27276	0.00524716	-2.28008	269970	34058.2	278700	34809.8	110293	5416.87	235912	0.126155	7.92673	0.899094
Q9QZW0|AT11C_MOUSE	Phospholipid-transporting ATPase 11C OS=Mus musculus OX=10090 GN=Atp11c PE=1 SV=2	4.26363	0.00530003	-2.27572	13998.4	1066.16	12820.7	1051.88	6042.7	534.523	12932.2	0.0761631	13.1297	1.11826
Q62186|SSRD_MOUSE	Translocon-associated protein subunit delta OS=Mus musculus OX=10090 GN=Ssr4 PE=1 SV=1	4.26131	0.00531361	-2.27461	30051.2	2395.7	32322.6	2236.33	12893.7	1492.23	27655.5	0.0797206	12.5438	1.09843
P15105|GLNA_MOUSE	Glutamine synthetase OS=Mus musculus OX=10090 GN=Glul PE=1 SV=6	4.25448	0.00535364	-2.27135	78398.7	22331	77990.2	20284.7	24611.2	9432.89	56067.7	0.284839	3.51076	0.545401
Q9CYV5|TM135_MOUSE	Transmembrane protein 135 OS=Mus musculus OX=10090 GN=Tmem135 PE=2 SV=1	-4.25328	0.00536072	-2.27078	12498.2	98109.7	10723.1	87115.4	4994.46	39945.6	-85611.5	7.84989	0.12739	-0.894863
Q8BSE0|RMD2_MOUSE	Regulator of microtubule dynamics protein 2 OS=Mus musculus OX=10090 GN=Rmdn2 PE=1 SV=1	4.25115	0.00537335	-2.26975	2482.56	154.696	2510.35	101.066	1076.95	198.94	2327.86	0.0623131	16.048	1.20542
Q99KR3|LACB2_MOUSE	Endoribonuclease LACTB2 OS=Mus musculus OX=10090 GN=Lactb2 PE=1 SV=1	-4.24737	0.00539576	-2.26795	11275.5	118376	13048.5	109590	4609.91	50220.6	-107101	10.4986	0.0952509	-1.02113
P27773|PDIA3_MOUSE	Protein disulfide-isomerase A3 OS=Mus musculus OX=10090 GN=Pdia3 PE=1 SV=2	4.24212	0.00542708	-2.26543	176272	25025.8	165955	24670.1	71204.9	3816.79	151247	0.141972	7.04364	0.847797
Q9CZN7|GLYM_MOUSE	Serine hydroxymethyltransferase, mitochondrial OS=Mus musculus OX=10090 GN=Shmt2 PE=1 SV=1"	4.24066	0.0054358	-2.26474	36846.7	12603.7	36814.5	12668.5	10460.1	4616.69	24243	0.342059	2.92348	0.4659
P51660|DHB4_MOUSE	Peroxisomal multifunctional enzyme type 2 OS=Mus musculus OX=10090 GN=Hsd17b4 PE=1 SV=3	-4.23888	0.0054465	-2.26388	334168	3071175	320790	2861400	60791.5	1.28995e+06	-2.73701e+06	9.19053	0.108808	-0.96334
Q920L1|FADS1_MOUSE	Acyl-CoA (8-3)-desaturase OS=Mus musculus OX=10090 GN=Fads1 PE=1 SV=1	4.23866	0.00544781	-2.26378	4781.58	468.736	4768.12	549.277	2007.74	331.971	4312.84	0.0980296	10.201	1.00864
P35762|CD81_MOUSE	CD81 antigen OS=Mus musculus OX=10090 GN=Cd81 PE=1 SV=2	4.23648	0.00546095	-2.26273	2239.47	68.8325	2157.52	0	1015.45	137.665	2170.63	0.0307361	32.535	1.51235
O35423|SPYA_MOUSE	Serine--pyruvate aminotransferase, mitochondrial OS=Mus musculus OX=10090 GN=Agxt PE=1 SV=3"	-4.23437	0.00547364	-2.26172	37101.7	414988	34974.3	355480	5442.33	178402	-377886	11.1851	0.0894045	-1.04864
Q91YT0|NDUV1_MOUSE	NADH dehydrogenase [ubiquinone] flavoprotein 1, mitochondrial OS=Mus musculus OX=10090 GN=Ndufv1 PE=1 SV=1"	4.22968	0.0055021	-2.25947	8420.75	1132.94	8028.32	1091.24	3433.39	294.984	7287.81	0.134541	7.43268	0.871146
Q99P30|NUDT7_MOUSE	Peroxisomal coenzyme A diphosphatase NUDT7 OS=Mus musculus OX=10090 GN=Nudt7 PE=1 SV=2	-4.21859	0.00556997	-2.25415	26508.6	394838	24602.6	348770	13197.2	174123	-368329	14.8947	0.0671379	-1.17303
O55022|PGRC1_MOUSE	Membrane-associated progesterone receptor component 1 OS=Mus musculus OX=10090 GN=Pgrmc1 PE=1 SV=4	4.21789	0.00557428	-2.25381	202802	27763.9	210815	31112.9	82221.8	11326.7	175039	0.136901	7.30454	0.863593
Q9Z0X1|AIFM1_MOUSE	Apoptosis-inducing factor 1, mitochondrial OS=Mus musculus OX=10090 GN=Aifm1 PE=1 SV=1"	4.21218	0.00560957	-2.25107	20962.5	3116.75	20808.7	3050.44	8412.37	1015.12	17845.7	0.148682	6.72575	0.82774
Q99LC9|PEX6_MOUSE	Peroxisome assembly factor 2 OS=Mus musculus OX=10090 GN=Pex6 PE=1 SV=1	-4.20904	0.00562914	-2.24956	9226.41	88349.8	10020.2	91630.5	2674.88	37501.6	-79123.3	9.57575	0.10443	-0.981173
P11276|FINC_MOUSE	Fibronectin OS=Mus musculus OX=10090 GN=Fn1 PE=1 SV=4	4.20869	0.00563132	-2.24939	4948.56	1029.63	4247.74	844.778	1723.51	705.467	3918.93	0.208066	4.80617	0.681799
O09158|CP3AP_MOUSE	Cytochrome P450 3A25 OS=Mus musculus OX=10090 GN=Cyp3a25 PE=1 SV=1	4.2058	0.0056494	-2.248	200505	26042.2	212600	24365.5	82669.1	6977.71	174463	0.129883	7.69924	0.886448
Q8VDG7|PAFA2_MOUSE	Platelet-activating factor acetylhydrolase 2, cytoplasmic OS=Mus musculus OX=10090 GN=Pafah2 PE=1 SV=2"	-4.20506	0.00565398	-2.24765	6321.45	53696.2	6095.84	50032.4	1190.69	22500.7	-47374.7	8.49428	0.117726	-0.929127
Q9EP96|SO1A4_MOUSE	Solute carrier organic anion transporter family member 1A4 OS=Mus musculus OX=10090 GN=Slco1a4 PE=1 SV=1	4.19857	0.00569484	-2.24452	3222.11	375.933	3449.91	264.336	1271.42	470.792	2846.18	0.116673	8.57097	0.93303
Q8K1N1|PLPL8_MOUSE	Calcium-independent phospholipase A2-gamma OS=Mus musculus OX=10090 GN=Pnpla8 PE=1 SV=1	-4.19844	0.00569566	-2.24446	3160.44	14571	3115.94	12550.2	1582.93	5200.02	-11410.5	4.61043	0.2169	-0.663741
O88962|CP8B1_MOUSE	7-alpha-hydroxycholest-4-en-3-one 12-alpha-hydroxylase OS=Mus musculus OX=10090 GN=Cyp8b1 PE=1 SV=1	4.19294	0.00573052	-2.24181	10300.9	1381.72	10869.9	1536.48	4130.86	1017.75	8919.19	0.134135	7.45515	0.872457
Q8C0C7|SYFA_MOUSE	Phenylalanine--tRNA ligase alpha subunit OS=Mus musculus OX=10090 GN=Farsa PE=1 SV=1	4.18685	0.00576941	-2.23887	2129.01	305.118	1935.21	176.896	768.832	409.843	1823.89	0.143314	6.97766	0.84371
P14869|RLA0_MOUSE	60S acidic ribosomal protein P0 OS=Mus musculus OX=10090 GN=Rplp0 PE=1 SV=3	4.18382	0.00578887	-2.23741	54354.7	8818.8	58045.3	9229.35	21257	4687.13	45535.9	0.162245	6.1635	0.789828
O08677|KNG1_MOUSE	Kininogen-1 OS=Mus musculus OX=10090 GN=Kng1 PE=1 SV=1	4.1788	0.00582123	-2.23499	8229.2	345.679	7532.02	384.813	3769.4	166.975	7883.52	0.0420064	23.8059	1.37668
Q99J08|S14L2_MOUSE	SEC14-like protein 2 OS=Mus musculus OX=10090 GN=Sec14l2 PE=1 SV=1	4.17847	0.00582341	-2.23482	16310	4091.44	17440.4	3135.72	5045.99	2956.55	12218.6	0.250855	3.98637	0.600578
O09012|PEX5_MOUSE	Peroxisomal targeting signal 1 receptor OS=Mus musculus OX=10090 GN=Pex5 PE=1 SV=2	-4.17179	0.00586682	-2.2316	1794.71	12038.7	1672.39	12484.5	786.787	4847.63	-10244	6.70786	0.149079	-0.826584
Q61285|ABCD2_MOUSE	ATP-binding cassette sub-family D member 2 OS=Mus musculus OX=10090 GN=Abcd2 PE=1 SV=1	-4.16153	0.00593425	-2.22663	12960.3	65197.9	11481.9	58723.4	4473.92	24703.1	-52237.5	5.03058	0.198784	-0.701618
P63030|MPC1_MOUSE	Mitochondrial pyruvate carrier 1 OS=Mus musculus OX=10090 GN=Mpc1 PE=1 SV=1	4.1577	0.0059597	-2.22478	7630.6	2932	7860.03	2941.92	2171.57	626.696	4698.59	0.384243	2.60252	0.415394
P11983|TCPA_MOUSE	T-complex protein 1 subunit alpha OS=Mus musculus OX=10090 GN=Tcp1 PE=1 SV=3	4.15675	0.00596601	-2.22432	5913.96	866.302	4984.12	802.426	2297.21	788.181	5047.66	0.146484	6.82668	0.834209
P27046|MA2A1_MOUSE	Alpha-mannosidase 2 OS=Mus musculus OX=10090 GN=Man2a1 PE=1 SV=2	4.14826	0.0060228	-2.2202	26390	1576.78	26361.4	1024.19	11898.9	1239.32	24813.3	0.0597489	16.7367	1.22367
P61620|S61A1_MOUSE	Protein transport protein Sec61 subunit alpha isoform 1 OS=Mus musculus OX=10090 GN=Sec61a1 PE=1 SV=2	4.12987	0.00614793	-2.21127	24425.1	2326.28	27313.8	2703.19	10568.3	1685.69	22098.8	0.0952415	10.4996	1.02117
Q9D826|SOX_MOUSE	Peroxisomal sarcosine oxidase OS=Mus musculus OX=10090 GN=Pipox PE=1 SV=1	-4.12509	0.00618091	-2.20895	71857.2	842502	68375.3	795650	14751.8	373347	-770645	11.7247	0.0852902	-1.0691
O70503|DHB12_MOUSE	Very-long-chain 3-oxoacyl-CoA reductase OS=Mus musculus OX=10090 GN=Hsd17b12 PE=1 SV=1	4.12045	0.00621308	-2.20669	25332.4	7539.04	26283.6	6727.4	7781.41	3747.08	17793.4	0.297605	3.36016	0.526361
P59999|ARPC4_MOUSE	Actin-related protein 2_3 complex subunit 4 OS=Mus musculus OX=10090 GN=Arpc4 PE=1 SV=3	4.10407	0.00632839	-2.19871	15381.5	2307.66	17695.9	1752.84	6207.28	1435.69	13073.8	0.150029	6.66539	0.823826
Q8CHQ9|NT8F2_MOUSE	N-acetyltransferase family 8 member 2 OS=Mus musculus OX=10090 GN=Nat8f2 PE=1 SV=1	4.10021	0.0063559	-2.19682	98896.2	11071.9	108855	11106.8	42579.8	4704.84	87824.3	0.111955	8.93219	0.950958
P14115|RL27A_MOUSE	60S ribosomal protein L27a OS=Mus musculus OX=10090 GN=Rpl27a PE=1 SV=5	4.08933	0.00643414	-2.19151	28127.3	2790.43	32087.2	3160.49	12303.3	1477.98	25336.9	0.099207	10.0799	1.00346
Q8VEM8|MPCP_MOUSE	Phosphate carrier protein, mitochondrial OS=Mus musculus OX=10090 GN=Slc25a3 PE=1 SV=1"	4.07884	0.00651057	-2.18638	72905.8	27544	78602.9	25809	19450	10790.2	45361.9	0.377802	2.64689	0.422736
Q8CC88|VWA8_MOUSE	von Willebrand factor A domain-containing protein 8 OS=Mus musculus OX=10090 GN=Vwa8 PE=1 SV=2	-4.07757	0.0065199	-2.18576	11734.6	54902	11616.3	55892.9	4545.2	20679.5	-43167.4	4.67864	0.213737	-0.670119
P45700|MA1A1_MOUSE	Mannosyl-oligosaccharide 1,2-alpha-mannosidase IA OS=Mus musculus OX=10090 GN=Man1a1 PE=1 SV=1"	4.07014	0.00657477	-2.18212	15561.2	2115.94	16668.3	1934.86	6422.41	1549.94	13445.3	0.135975	7.35427	0.86654
Q60597|ODO1_MOUSE	2-oxoglutarate dehydrogenase, mitochondrial OS=Mus musculus OX=10090 GN=Ogdh PE=1 SV=3"	4.05965	0.00665311	-2.17698	9368.64	3154.79	9686.05	3457.05	2286.04	2036.03	6213.85	0.336739	2.96965	0.472706
Q60936|COQ8A_MOUSE	Atypical kinase COQ8A, mitochondrial OS=Mus musculus OX=10090 GN=Coq8a PE=1 SV=2"	4.04132	0.00679254	-2.16797	4923.61	1721.92	5166.84	1464.44	1149.99	1090	3201.69	0.349727	2.85937	0.45627
Q8R1V4|TMED4_MOUSE	Transmembrane emp24 domain-containing protein 4 OS=Mus musculus OX=10090 GN=Tmed4 PE=1 SV=1	4.0356	0.00683674	-2.16515	2805.88	344.763	2719.7	447.857	1197.73	230.467	2461.12	0.122872	8.13857	0.910548
Q8BJ64|CHDH_MOUSE	Choline dehydrogenase, mitochondrial OS=Mus musculus OX=10090 GN=Chdh PE=1 SV=1"	4.03334	0.00685426	-2.16404	29719.8	6741.99	32652.6	5910.09	10826.7	3550.18	22977.8	0.226852	4.40816	0.644257
Q9DBF1|AL7A1_MOUSE	Alpha-aminoadipic semialdehyde dehydrogenase OS=Mus musculus OX=10090 GN=Aldh7a1 PE=1 SV=4	4.01132	0.0070278	-2.15318	8914.52	2587.26	8741.41	2675.16	2668.66	1682.38	6327.26	0.29023	3.44555	0.537258
Q8QZR5|ALAT1_MOUSE	Alanine aminotransferase 1 OS=Mus musculus OX=10090 GN=Gpt PE=1 SV=3	3.99391	0.00716852	-2.14457	2726.63	549.386	2890.99	702.318	1026.04	368.739	2177.25	0.201489	4.96306	0.695749
Q8K2B3|SDHA_MOUSE	Succinate dehydrogenase [ubiquinone] flavoprotein subunit, mitochondrial OS=Mus musculus OX=10090 GN=Sdha PE=1 SV=1"	3.9912	0.00719073	-2.14323	43768.9	10641.3	41175.2	12604.2	15538.7	5841.12	33127.5	0.243126	4.1131	0.614169
Q9D880|TIM50_MOUSE	Mitochondrial import inner membrane translocase subunit TIM50 OS=Mus musculus OX=10090 GN=Timm50 PE=1 SV=1	-3.98631	0.00723093	-2.14081	321.826	1965.81	317.002	2160.93	266.769	780.481	-1643.98	6.10829	0.163712	-0.78592
Q99KB8|GLO2_MOUSE	Hydroxyacylglutathione hydrolase, mitochondrial OS=Mus musculus OX=10090 GN=Hagh PE=1 SV=2"	-3.98289	0.00725923	-2.13911	5217.96	23408.3	5064.12	20957.9	1061.12	9072.38	-18190.3	4.4861	0.222911	-0.651869
Q8BL86|MBLC2_MOUSE	Metallo-beta-lactamase domain-containing protein 2 OS=Mus musculus OX=10090 GN=Mblac2 PE=1 SV=2	3.98113	0.00727388	-2.13823	26061.8	2176.36	26501.6	1712.59	11833.3	1989.37	23885.5	0.0835076	11.975	1.07827
Q9DD20|MET7B_MOUSE	Methyltransferase-like protein 7B OS=Mus musculus OX=10090 GN=Mettl7b PE=1 SV=2	3.96663	0.00739539	-2.13104	170141	27481.2	182655	27869.7	71005.4	11496.5	142660	0.16152	6.19119	0.791774
Q9QY30|ABCBB_MOUSE	Bile salt export pump OS=Mus musculus OX=10090 GN=Abcb11 PE=1 SV=2	3.96598	0.00740091	-2.13071	10318.6	1912.83	10616.8	1574.8	3981.84	1453.78	8405.75	0.185377	5.39441	0.731944
P60710|ACTB_MOUSE	Actin, cytoplasmic 1 OS=Mus musculus OX=10090 GN=Actb PE=1 SV=1"	3.9599	0.00745258	-2.12769	1054940	111426	1062710	93540	473618	52635.5	943514	0.105623	9.46759	0.976239
Q9CR68|UCRI_MOUSE	Cytochrome b-c1 complex subunit Rieske, mitochondrial OS=Mus musculus OX=10090 GN=Uqcrfs1 PE=1 SV=1"	3.95536	0.00749148	-2.12543	33745	7282.19	33697.8	5710.49	12776.3	3976.15	26462.8	0.215801	4.63391	0.665947
P01899|HA11_MOUSE	H-2 class I histocompatibility antigen, D-B alpha chain OS=Mus musculus OX=10090 GN=H2-D1 PE=1 SV=2"	3.95025	0.00753547	-2.12289	13314.3	1335.96	13233.2	1392.31	6013.53	785.456	11978.4	0.10034	9.9661	0.998525
P24270|CATA_MOUSE	Catalase OS=Mus musculus OX=10090 GN=Cat PE=1 SV=4	-3.94969	0.00754033	-2.12261	449662	4366350	449785	3712100	78776.7	1.98172e+06	-3.91669e+06	9.71028	0.102984	-0.987232
Q06185|ATP5I_MOUSE	ATP synthase subunit e, mitochondrial OS=Mus musculus OX=10090 GN=Atp5me PE=1 SV=2"	3.94834	0.00755199	-2.12194	16427.4	2737.77	16091.4	2811.1	6690.86	1821.5	13689.6	0.166659	6.00029	0.778172
Q9DCN2|NB5R3_MOUSE	NADH-cytochrome b5 reductase 3 OS=Mus musculus OX=10090 GN=Cyb5r3 PE=1 SV=3	3.92884	0.00772303	-2.11221	83754.8	32110.6	89673.2	30816	22300.3	13923	51644.2	0.383388	2.60832	0.416362
Q8BM55|TM214_MOUSE	Transmembrane protein 214 OS=Mus musculus OX=10090 GN=Tmem214 PE=1 SV=1	3.9207	0.00779573	-2.10814	2704.98	332.417	2611.1	338.57	1180.52	266.705	2372.56	0.122891	8.1373	0.91048
Q9DBN5|LONP2_MOUSE	Lon protease homolog 2, peroxisomal OS=Mus musculus OX=10090 GN=Lonp2 PE=1 SV=1"	-3.91485	0.00784845	-2.10522	18759.6	113707	17567.3	100165	3671.14	48367.4	-94947.8	6.06129	0.164981	-0.782565
Q99L88|SNTB1_MOUSE	Beta-1-syntrophin OS=Mus musculus OX=10090 GN=Sntb1 PE=1 SV=4	3.91134	0.00788019	-2.10346	27050.5	1814.63	25901.5	1709.59	12882.6	741.567	25235.9	0.067083	14.9069	1.17339
Q8VCR2|DHB13_MOUSE	17-beta-hydroxysteroid dehydrogenase 13 OS=Mus musculus OX=10090 GN=Hsd17b13 PE=1 SV=2	3.91025	0.00789016	-2.10291	57423.1	11063.6	64587.9	10171.6	23456.2	3472.08	46359.5	0.192669	5.19026	0.715189
P47962|RL5_MOUSE	60S ribosomal protein L5 OS=Mus musculus OX=10090 GN=Rpl5 PE=1 SV=3	3.909	0.00790147	-2.10229	39231.2	3340.71	39528.2	2955.72	18239.8	2123.62	35890.5	0.0851543	11.7434	1.06979
Q9D2C7|BI1_MOUSE	Bax inhibitor 1 OS=Mus musculus OX=10090 GN=Tmbim6 PE=1 SV=1	3.89878	0.00799519	-2.09717	7297.6	888.925	6877.03	822.664	3262.6	404.058	6408.67	0.121811	8.20946	0.914315
Q9DBA6|TYSD1_MOUSE	Peroxisomal leader peptide-processing protease OS=Mus musculus OX=10090 GN=Tysnd1 PE=1 SV=1	-3.8859	0.00811509	-2.09071	2383.27	25177.8	2493.79	22677.8	626.594	11715.2	-22794.6	10.5644	0.0946573	-1.02385
Q91XE8|TM205_MOUSE	Transmembrane protein 205 OS=Mus musculus OX=10090 GN=Tmem205 PE=1 SV=1	3.88575	0.00811655	-2.09063	37678.2	2724.78	36777.9	1792.06	17815.4	2504.45	34953.4	0.0723171	13.828	1.14076
Q8BMF4|ODP2_MOUSE	Dihydrolipoyllysine-residue acetyltransferase component of pyruvate dehydrogenase complex, mitochondrial OS=Mus musculus OX=10090 GN=Dlat PE=1 SV=2"	3.87705	0.00819864	-2.08626	18877.7	5181.4	16899.5	4356.72	6553.91	2639.1	13696.3	0.274472	3.64336	0.561502
P58710|GGLO_MOUSE	L-gulonolactone oxidase OS=Mus musculus OX=10090 GN=Gulo PE=1 SV=3	3.87622	0.00820651	-2.08584	79351.3	24876.4	82802.7	26360.5	26348	9787.7	54474.9	0.313497	3.18982	0.503766
O89023|TPP1_MOUSE	Tripeptidyl-peptidase 1 OS=Mus musculus OX=10090 GN=Tpp1 PE=1 SV=2	3.87394	0.00822827	-2.08469	21332.7	9134.5	21429.4	10560.2	5155.7	3616.37	12198.2	0.428193	2.3354	0.368361
P47963|RL13_MOUSE	60S ribosomal protein L13 OS=Mus musculus OX=10090 GN=Rpl13 PE=1 SV=3	3.87296	0.00823762	-2.0842	33440.9	5125.14	36655.6	5277.37	14204.2	3471.76	28315.8	0.153259	6.52488	0.814573
P46978|STT3A_MOUSE	Dolichyl-diphosphooligosaccharide--protein glycosyltransferase subunit STT3A OS=Mus musculus OX=10090 GN=Stt3a PE=1 SV=1	3.85976	0.00836462	-2.07755	28547.1	3969.03	32181.3	3288.72	12308.7	3269.56	24578.1	0.139034	7.19247	0.856878
Q91XC9|PEX16_MOUSE	Peroxisomal membrane protein PEX16 OS=Mus musculus OX=10090 GN=Pex16 PE=1 SV=2	-3.85351	0.00842554	-2.0744	6875.08	43874.1	6361.13	43177.5	3251.49	18925.5	-36999	6.38162	0.1567	-0.804931
O08807|PRDX4_MOUSE	Peroxiredoxin-4 OS=Mus musculus OX=10090 GN=Prdx4 PE=1 SV=1	3.85074	0.0084527	-2.073	31325.2	3911.43	31432.1	3862.33	14234.4	328.073	27413.8	0.124865	8.00864	0.903559
Q9ET22|DPP2_MOUSE	Dipeptidyl peptidase 2 OS=Mus musculus OX=10090 GN=Dpp7 PE=1 SV=2	3.84703	0.00848923	-2.07113	3656.29	646.063	3974.59	388.128	1347.24	796.263	3010.23	0.176699	5.65934	0.752766
P47911|RL6_MOUSE	60S ribosomal protein L6 OS=Mus musculus OX=10090 GN=Rpl6 PE=1 SV=3	3.84307	0.00852843	-2.06913	87620.6	12279	97442.5	12209.7	39072.8	3266.24	75341.7	0.140138	7.13584	0.853445
P46735|MYO1B_MOUSE	Unconventional myosin-Ib OS=Mus musculus OX=10090 GN=Myo1b PE=1 SV=3	3.83979	0.008561	-2.06748	4569.41	809.698	4573.95	678.127	1784.69	806.096	3759.71	0.1772	5.64335	0.751537
O55143|AT2A2_MOUSE	Sarcoplasmic_endoplasmic reticulum calcium ATPase 2 OS=Mus musculus OX=10090 GN=Atp2a2 PE=1 SV=2	3.83905	0.00856844	-2.0671	15224.8	3315.53	15813.5	3059.18	5981.05	1649.31	11909.3	0.217772	4.59197	0.661999
P14148|RL7_MOUSE	60S ribosomal protein L7 OS=Mus musculus OX=10090 GN=Rpl7 PE=1 SV=2	3.83157	0.00864332	-2.06332	68695.3	9753.99	74821.2	9101.33	30352.1	5030.48	58941.3	0.141989	7.04279	0.847745
Q8JZR0|ACSL5_MOUSE	Long-chain-fatty-acid--CoA ligase 5 OS=Mus musculus OX=10090 GN=Acsl5 PE=1 SV=1	3.82114	0.00874908	-2.05804	180169	47308.9	190300	50526.2	67630.1	16183.1	132860	0.262581	3.80834	0.580736
Q9WU84|CCS_MOUSE	Copper chaperone for superoxide dismutase OS=Mus musculus OX=10090 GN=Ccs PE=1 SV=1	-3.81565	0.00880528	-2.05526	2059.83	9377.17	1982.28	7683.66	453.357	3808.55	-7317.34	4.55241	0.219664	-0.658241
P24369|PPIB_MOUSE	Peptidyl-prolyl cis-trans isomerase B OS=Mus musculus OX=10090 GN=Ppib PE=1 SV=2	3.78887	0.00908539	-2.04166	111067	9234.02	128285	8179.01	53631.9	3614.71	101833	0.0831394	12.028	1.08019
P62814|VATB2_MOUSE	V-type proton ATPase subunit B, brain isoform OS=Mus musculus OX=10090 GN=Atp6v1b2 PE=1 SV=1"	3.78653	0.00911031	-2.04047	610.772	191.802	563.785	177.841	208.205	74.9798	418.97	0.314032	3.18439	0.503026
P80315|TCPD_MOUSE	T-complex protein 1 subunit delta OS=Mus musculus OX=10090 GN=Cct4 PE=1 SV=3	3.75664	0.00943578	-2.02522	19792.1	1888.55	20832.7	1794.09	9512.79	599.782	17903.5	0.0954193	10.4801	1.02036
P56395|CYB5_MOUSE	Cytochrome b5 OS=Mus musculus OX=10090 GN=Cyb5a PE=1 SV=2	3.74961	0.00951412	-2.02163	142494	26088.3	141564	29624.6	59678.2	17135.6	116406	0.183083	5.46199	0.737351
Q9WUM5|SUCA_MOUSE	Succinate--CoA ligase [ADP_GDP-forming] subunit alpha, mitochondrial OS=Mus musculus OX=10090 GN=Suclg1 PE=1 SV=4"	3.74146	0.00960591	-2.01746	40013.7	9599.4	39385.6	7085.75	14894.7	6516.95	30414.3	0.239903	4.16835	0.619965
P53026|RL10A_MOUSE	60S ribosomal protein L10a OS=Mus musculus OX=10090 GN=Rpl10a PE=1 SV=3	3.72013	0.00985088	-2.00652	68721	9908.78	78808.1	8561.35	31373.3	3929.13	58812.2	0.144188	6.93537	0.841069
P34927|ASGR1_MOUSE	Asialoglycoprotein receptor 1 OS=Mus musculus OX=10090 GN=Asgr1 PE=1 SV=4	3.7118	0.00994843	-2.00225	26011.7	2783.75	23546.8	3082.75	12462.3	1154.88	23227.9	0.107019	9.34411	0.970538
P10126|EF1A1_MOUSE	Elongation factor 1-alpha 1 OS=Mus musculus OX=10090 GN=Eef1a1 PE=1 SV=3	3.71068	0.00996162	-2.00167	464332	108952	519145	88824.5	184146	52723.3	355380	0.234642	4.26181	0.629594
Q9DBG1|CP27A_MOUSE	Sterol 26-hydroxylase, mitochondrial OS=Mus musculus OX=10090 GN=Cyp27a1 PE=1 SV=1"	3.70787	0.00999477	-2.00023	31149	7530.26	29538.5	6815.6	12226.8	3578.85	23618.7	0.24175	4.13651	0.616634
Q8BP67|RL24_MOUSE	60S ribosomal protein L24 OS=Mus musculus OX=10090 GN=Rpl24 PE=1 SV=2	3.70761	0.0099978	-2.0001	12941.9	2418.5	13577.2	2524.11	5608.3	878.197	10523.4	0.186874	5.35121	0.728452
Q8R1S0|COQ6_MOUSE	Ubiquinone biosynthesis monooxygenase COQ6, mitochondrial OS=Mus musculus OX=10090 GN=Coq6 PE=1 SV=3"	3.70751	0.00999906	-2.00004	850.346	240.019	816.292	207.349	169.526	282.239	610.327	0.282261	3.54282	0.549349
Q9DBW0|CP4V2_MOUSE	Cytochrome P450 4V2 OS=Mus musculus OX=10090 GN=Cyp4v2 PE=1 SV=1	3.70631	0.0100132	-1.99943	19131.7	6364.09	21799.7	5828.2	6708.06	1571.4	12767.6	0.332646	3.00619	0.478017
Q78PY7|SND1_MOUSE	Staphylococcal nuclease domain-containing protein 1 OS=Mus musculus OX=10090 GN=Snd1 PE=1 SV=1	3.6979	0.0101136	-1.9951	11692.7	3095.99	9694.03	2599.32	4487.25	1217.49	8596.66	0.264781	3.7767	0.577113
P17665|COX7C_MOUSE	Cytochrome c oxidase subunit 7C, mitochondrial OS=Mus musculus OX=10090 GN=Cox7c PE=1 SV=1"	3.69312	0.010171	-1.99263	1072.01	65.3268	1154.67	0	529.278	130.654	1006.68	0.0609388	16.4099	1.21511
Q9DCM2|GSTK1_MOUSE	Glutathione S-transferase kappa 1 OS=Mus musculus OX=10090 GN=Gstk1 PE=1 SV=3	-3.67756	0.0103607	-1.98461	24854.6	123259	25161.6	110860	3807.76	53380.5	-98404.4	4.9592	0.201645	-0.695412
Q91YH5|ATLA3_MOUSE	Atlastin-3 OS=Mus musculus OX=10090 GN=Atl3 PE=1 SV=1	3.66657	0.010497	-1.97894	4655.34	1017.99	4435.36	965.863	1760.91	914.163	3637.36	0.21867	4.57309	0.66021
Q921G7|ETFD_MOUSE	Electron transfer flavoprotein-ubiquinone oxidoreductase, mitochondrial OS=Mus musculus OX=10090 GN=Etfdh PE=1 SV=1"	3.66203	0.0105539	-1.97659	30130.6	6884.6	34891	7587.22	12488.8	2282.45	23246	0.228492	4.37652	0.641129
Q9DCJ5|NDUA8_MOUSE	NADH dehydrogenase [ubiquinone] 1 alpha subcomplex subunit 8 OS=Mus musculus OX=10090 GN=Ndufa8 PE=1 SV=3	3.65469	0.0106466	-1.97279	9769.93	2057.83	11309.2	1955.94	3907.11	1595.67	7712.1	0.210629	4.74769	0.676483
Q99KI0|ACON_MOUSE	Aconitate hydratase, mitochondrial OS=Mus musculus OX=10090 GN=Aco2 PE=1 SV=1"	3.63058	0.0109576	-1.96029	14517.2	2744.18	14862.2	2666.54	6337.13	1379.18	11773	0.189029	5.29018	0.723471
Q9QXD1|ACOX2_MOUSE	Peroxisomal acyl-coenzyme A oxidase 2 OS=Mus musculus OX=10090 GN=Acox2 PE=1 SV=2	-3.62895	0.010979	-1.95944	55765	338592	60796.4	316660	14485.6	155198	-282828	6.07178	0.164696	-0.783316
Q99LB7|SARDH_MOUSE	Sarcosine dehydrogenase, mitochondrial OS=Mus musculus OX=10090 GN=Sardh PE=1 SV=1"	3.62692	0.0110057	-1.95838	137281	33133.9	136630	34546.9	57029.8	6768.94	104147	0.241358	4.14322	0.617338
Q99PL5|RRBP1_MOUSE	Ribosome-binding protein 1 OS=Mus musculus OX=10090 GN=Rrbp1 PE=1 SV=2	3.62495	0.0110316	-1.95736	10474.6	1787.72	12036.2	1670.57	4732.17	759.999	8686.86	0.170672	5.85919	0.767838
O08573|LEG9_MOUSE	Galectin-9 OS=Mus musculus OX=10090 GN=Lgals9 PE=1 SV=1	3.62029	0.0110933	-1.95494	48565.1	15237.1	48301.7	14079.3	16993.1	7087.06	33328	0.313747	3.18728	0.503421
O88451|RDH7_MOUSE	Retinol dehydrogenase 7 OS=Mus musculus OX=10090 GN=Rdh7 PE=1 SV=1	3.60899	0.0112445	-1.94906	287108	92755	318835	87303.8	102819	32070	194353	0.323067	3.09533	0.490707
P70441|NHRF1_MOUSE	Na(+)_H(+) exchange regulatory cofactor NHE-RF1 OS=Mus musculus OX=10090 GN=Slc9a3r1 PE=1 SV=3	3.60749	0.0112648	-1.94828	38916.8	13122.9	38858.8	12352	12944.9	6076.62	25793.9	0.337203	2.96557	0.472108
O08749|DLDH_MOUSE	Dihydrolipoyl dehydrogenase, mitochondrial OS=Mus musculus OX=10090 GN=Dld PE=1 SV=2"	3.60673	0.0112751	-1.94788	25465.3	6267.3	21901.5	6032.19	10390.1	2318.71	19198	0.246112	4.0632	0.608868
Q05920|PYC_MOUSE	Pyruvate carboxylase, mitochondrial OS=Mus musculus OX=10090 GN=Pc PE=1 SV=1"	3.60106	0.011352	-1.94493	121082	35238.5	125100	34170	47420.1	4940.03	85843.4	0.29103	3.43607	0.536062
Q8BGG9|ACNT2_MOUSE	Acyl-coenzyme A amino acid N-acyltransferase 2 OS=Mus musculus OX=10090 GN=Acnat2 PE=1 SV=1	-3.59754	0.0114001	-1.94309	8668.3	50289.7	8628.17	45401.1	1358.69	23098.8	-41621.4	5.80156	0.172367	-0.763545
Q3TC72|FAHD2_MOUSE	Fumarylacetoacetate hydrolase domain-containing protein 2A OS=Mus musculus OX=10090 GN=Fahd2 PE=1 SV=1	3.59348	0.0114558	-1.94097	1348.1	45.4443	1381.25	0	719.29	90.8886	1302.66	0.0337099	29.6649	1.47224
Q9DCU9|HOGA1_MOUSE	4-hydroxy-2-oxoglutarate aldolase, mitochondrial OS=Mus musculus OX=10090 GN=Hoga1 PE=1 SV=1"	3.59272	0.0114663	-1.94058	14988.5	5804.54	14444	5770.5	3904.61	3300.32	9183.96	0.387266	2.5822	0.41199
P62806|H4_MOUSE	Histone H4 OS=Mus musculus OX=10090 GN=H4c1 PE=1 SV=2	-3.59076	0.0114934	-1.93955	4945.56	15514.1	4676.75	16407.5	1253.41	5751.53	-10568.5	3.13698	0.318778	-0.496512
Q9CQA3|SDHB_MOUSE	Succinate dehydrogenase [ubiquinone] iron-sulfur subunit, mitochondrial OS=Mus musculus OX=10090 GN=Sdhb PE=1 SV=1"	3.56857	0.0118045	-1.92795	40897.3	6527.25	43015.4	5497.69	18999.3	3174.22	34370.1	0.159601	6.26563	0.796965
P35486|ODPA_MOUSE	Pyruvate dehydrogenase E1 component subunit alpha, somatic form, mitochondrial OS=Mus musculus OX=10090 GN=Pdha1 PE=1 SV=1"	3.53305	0.0123221	-1.90932	19302.3	6296.6	20226.5	5209.91	6617.8	3226.2	13005.7	0.32621	3.06551	0.486503
Q99L13|3HIDH_MOUSE	3-hydroxyisobutyrate dehydrogenase, mitochondrial OS=Mus musculus OX=10090 GN=Hibadh PE=1 SV=1"	3.52817	0.0123952	-1.90675	7746.1	1861.64	7685.71	1893.38	3245.53	770.376	5884.46	0.240332	4.16091	0.619188
Q91VS7|MGST1_MOUSE	Microsomal glutathione S-transferase 1 OS=Mus musculus OX=10090 GN=Mgst1 PE=1 SV=3	3.52544	0.0124362	-1.90531	102909	25516.5	97147.2	23375.3	43234.8	7642.21	77392.3	0.247952	4.03303	0.605632
Q9D379|HYEP_MOUSE	Epoxide hydrolase 1 OS=Mus musculus OX=10090 GN=Ephx1 PE=1 SV=2	3.52331	0.0124685	-1.90419	40691.9	6242.27	39876.6	6398.6	19524.9	1090.93	34449.7	0.153403	6.51877	0.814166
Q02257|PLAK_MOUSE	Junction plakoglobin OS=Mus musculus OX=10090 GN=Jup PE=1 SV=3	3.52302	0.0124727	-1.90404	3017.63	674.849	2693.23	602.346	1274.55	379.982	2342.78	0.223635	4.47156	0.650459
Q91YW3|DNJC3_MOUSE	DnaJ homolog subfamily C member 3 OS=Mus musculus OX=10090 GN=Dnajc3 PE=1 SV=1	3.50702	0.0127174	-1.8956	18585.3	2835.97	21523.9	2774.6	8974.77	350.577	15749.3	0.152592	6.55343	0.816469
Q9CQF9|PCYOX_MOUSE	Prenylcysteine oxidase OS=Mus musculus OX=10090 GN=Pcyox1 PE=1 SV=1	3.5013	0.0128061	-1.89258	3572.66	269.459	3144.43	154.745	1851.56	363.183	3303.2	0.0754224	13.2587	1.1225
P80317|TCPZ_MOUSE	T-complex protein 1 subunit zeta OS=Mus musculus OX=10090 GN=Cct6a PE=1 SV=3	3.49593	0.0128901	-1.88975	20548.4	2273.11	16944.2	1823.29	10370	1331.67	18275.3	0.110622	9.03976	0.956157
Q9CRD0|OCAD1_MOUSE	OCIA domain-containing protein 1 OS=Mus musculus OX=10090 GN=Ociad1 PE=1 SV=1	-3.49165	0.0129573	-1.88748	2766.36	8747.11	2690.57	8300.74	2405.28	2439.33	-5980.75	3.16195	0.31626	-0.499955
Q8BXA1|GOLI4_MOUSE	Golgi integral membrane protein 4 OS=Mus musculus OX=10090 GN=Golim4 PE=1 SV=1	3.48643	0.0130399	-1.88473	4944.92	488.636	4427.11	343.807	2495.38	555.029	4456.29	0.0988158	10.1198	1.00517
Q9QYC7|VKGC_MOUSE	Vitamin K-dependent gamma-carboxylase OS=Mus musculus OX=10090 GN=Ggcx PE=1 SV=1	3.48571	0.0130513	-1.88435	8660.48	1043.66	10281.3	1064.82	4367	170.044	7616.83	0.120508	8.29821	0.918984
O88833|CP4AA_MOUSE	Cytochrome P450 4A10 OS=Mus musculus OX=10090 GN=Cyp4a10 PE=1 SV=2	3.48565	0.0130524	-1.88431	4457.5	1018.22	4799.55	965.839	1933.24	396.057	3439.27	0.22843	4.37772	0.641248
Q9CYW4|HDHD3_MOUSE	Haloacid dehalogenase-like hydrolase domain-containing protein 3 OS=Mus musculus OX=10090 GN=Hdhd3 PE=1 SV=1	3.47603	0.0132063	-1.87922	3898.33	933.327	4449.86	776.834	1675.34	321.818	2965	0.239417	4.17681	0.620845
P11352|GPX1_MOUSE	Glutathione peroxidase 1 OS=Mus musculus OX=10090 GN=Gpx1 PE=1 SV=2	3.45897	0.0134842	-1.87017	94255.8	24805.4	109584	23269.7	38946.1	9785.23	69450.3	0.263172	3.7998	0.579761
P26150|3BHS3_MOUSE	3 beta-hydroxysteroid dehydrogenase_Delta 5-->4-isomerase type 3 OS=Mus musculus OX=10090 GN=Hsd3b3 PE=1 SV=3	3.45687	0.013519	-1.86906	13809.4	4300.44	13731.6	4080.72	5082.71	2105.3	9508.93	0.311415	3.21115	0.506661
Q9DCQ2|ASPD_MOUSE	Putative L-aspartate dehydrogenase OS=Mus musculus OX=10090 GN=Aspdh PE=1 SV=1	3.45603	0.0135328	-1.86861	51264.5	6532.49	46787.8	4290.49	25020.3	6639.81	44732	0.127427	7.84762	0.894738
P05213|TBA1B_MOUSE	Tubulin alpha-1B chain OS=Mus musculus OX=10090 GN=Tuba1b PE=1 SV=2	3.44039	0.0137943	-1.8603	15829.7	7869.53	15808.6	7175.79	4103.08	2139.65	7960.14	0.497138	2.01151	0.303523
Q99JY0|ECHB_MOUSE	Trifunctional enzyme subunit beta, mitochondrial OS=Mus musculus OX=10090 GN=Hadhb PE=1 SV=1"	3.43118	0.0139509	-1.8554	24499.8	8805.59	26146.2	8948.97	8916.51	2044.77	15694.2	0.359416	2.78229	0.444403
Q9CR57|RL14_MOUSE	60S ribosomal protein L14 OS=Mus musculus OX=10090 GN=Rpl14 PE=1 SV=3	3.42531	0.0140518	-1.85227	105834	17416.5	124166	16696.2	50811.8	9131.37	88417.1	0.164565	6.07662	0.783662
Q02248|CTNB1_MOUSE	Catenin beta-1 OS=Mus musculus OX=10090 GN=Ctnnb1 PE=1 SV=1	3.42399	0.0140746	-1.85157	17450.7	1846.63	16350.3	1160.49	8917.26	1886.14	15604.1	0.10582	9.45003	0.975433
P34914|HYES_MOUSE	Bifunctional epoxide hydrolase 2 OS=Mus musculus OX=10090 GN=Ephx2 PE=1 SV=2	-3.41849	0.01417	-1.84863	59379.4	514838	61931.4	461995	10344.2	266266	-455458	8.6703	0.115336	-0.938034
Q9CQX2|CYB5B_MOUSE	Cytochrome b5 type B OS=Mus musculus OX=10090 GN=Cyb5b PE=1 SV=1	3.41187	0.0142857	-1.8451	28054.1	14099.4	30439.3	15292.1	7735.3	2660.63	13954.7	0.502579	1.98974	0.298796
Q8BH59|CMC1_MOUSE	Calcium-binding mitochondrial carrier protein Aralar1 OS=Mus musculus OX=10090 GN=Slc25a12 PE=1 SV=1	3.40373	0.0144295	-1.84075	4514.36	1214.84	4752.63	920.755	1654.2	1011.16	3299.52	0.269106	3.71601	0.570077
Q9CY27|TECR_MOUSE	Very-long-chain enoyl-CoA reductase OS=Mus musculus OX=10090 GN=Tecr PE=1 SV=1	3.40122	0.0144742	-1.8394	15898.2	2774.55	17878.2	2774.43	7561.8	1540.04	13123.6	0.17452	5.73	0.758155
Q9CQC7|NDUB4_MOUSE	NADH dehydrogenase [ubiquinone] 1 beta subcomplex subunit 4 OS=Mus musculus OX=10090 GN=Ndufb4 PE=1 SV=3	3.39559	0.0145749	-1.83639	5108.09	1240.43	5073.85	1218.03	2217.47	521.863	3867.67	0.242835	4.11802	0.614688
Q9DBK0|ACO12_MOUSE	Acetyl-coenzyme A thioesterase OS=Mus musculus OX=10090 GN=Acot12 PE=1 SV=1	-3.39483	0.0145886	-1.83599	2600.16	27165	2524.9	21932.3	778.548	14451	-24564.8	10.4474	0.0957171	-1.01901
P62717|RL18A_MOUSE	60S ribosomal protein L18a OS=Mus musculus OX=10090 GN=Rpl18a PE=1 SV=1	3.39449	0.0145946	-1.83581	8589.19	846.843	10080.4	699.216	4543.51	407.078	7742.34	0.0985941	10.1426	1.00615
P67984|RL22_MOUSE	60S ribosomal protein L22 OS=Mus musculus OX=10090 GN=Rpl22 PE=1 SV=2	3.37972	0.014863	-1.82789	19788	5144.15	20093.7	5237.6	8390.74	2165.85	14643.9	0.259962	3.84671	0.585089
Q8C165|P20D1_MOUSE	N-fatty-acyl-amino acid synthase_hydrolase PM20D1 OS=Mus musculus OX=10090 GN=Pm20d1 PE=1 SV=1	3.37971	0.0148631	-1.82789	21861.7	2854.1	22203.8	2062.45	11096.3	1841.51	19007.6	0.130552	7.65976	0.884215
O09159|MA2B1_MOUSE	Lysosomal alpha-mannosidase OS=Mus musculus OX=10090 GN=Man2b1 PE=1 SV=4	3.37334	0.0149805	-1.82447	5952.45	2240.01	5661.77	1950.84	1551.66	1561.07	3712.44	0.376317	2.65733	0.424446
O08547|SC22B_MOUSE	Vesicle-trafficking protein SEC22b OS=Mus musculus OX=10090 GN=Sec22b PE=1 SV=3	3.36665	0.015105	-1.82088	5520.08	1155.24	5181.48	1224.06	2569.84	345.706	4364.84	0.20928	4.77829	0.679272
Q9D7J9|ECHD3_MOUSE	Enoyl-CoA hydratase domain-containing protein 3, mitochondrial OS=Mus musculus OX=10090 GN=Echdc3 PE=1 SV=1"	3.34772	0.015463	-1.81071	9582.81	2146.92	10648.7	1186.95	3943.95	2044.47	7435.89	0.224039	4.46352	0.649677
Q924Z4|CERS2_MOUSE	Ceramide synthase 2 OS=Mus musculus OX=10090 GN=Cers2 PE=1 SV=1	3.34675	0.0154815	-1.81019	10488	1755.27	10002.4	1896.24	5199.91	441.802	8732.77	0.167359	5.97517	0.77635
Q9QXZ6|SO1A1_MOUSE	Solute carrier organic anion transporter family member 1A1 OS=Mus musculus OX=10090 GN=Slco1a1 PE=1 SV=1	3.34052	0.0156017	-1.80683	10246.2	882.267	12293.5	758.626	5563.72	689.642	9363.96	0.0861065	11.6135	1.06496
Q9R0A0|PEX14_MOUSE	Peroxisomal membrane protein PEX14 OS=Mus musculus OX=10090 GN=Pex14 PE=1 SV=1	-3.32723	0.0158611	-1.79967	6552.53	42844.5	7177.23	40789.2	2524.97	21668.5	-36292	6.53862	0.152937	-0.815486
Q9QXE0|HACL1_MOUSE	2-hydroxyacyl-CoA lyase 1 OS=Mus musculus OX=10090 GN=Hacl1 PE=1 SV=2	-3.31388	0.0161268	-1.79245	209052	1648180	225440	1513950	43655.3	867449	-1.43913e+06	7.88405	0.126838	-0.896749
P62900|RL31_MOUSE	60S ribosomal protein L31 OS=Mus musculus OX=10090 GN=Rpl31 PE=1 SV=1	3.30846	0.0162359	-1.78952	31478.5	6457.16	37222.5	4679.9	14514.1	4257.7	25021.3	0.205129	4.87497	0.687972
Q9Z2G9|HTAI2_MOUSE	Oxidoreductase HTATIP2 OS=Mus musculus OX=10090 GN=Htatip2 PE=1 SV=3	-3.3077	0.0162512	-1.78911	3715.11	15017.7	4026.02	14061.7	1242.94	6720.15	-11302.6	4.04234	0.247382	-0.606633
Q6ZWV3|RL10_MOUSE	60S ribosomal protein L10 OS=Mus musculus OX=10090 GN=Rpl10 PE=1 SV=3	3.30695	0.0162663	-1.78871	18278.2	3275.77	21304.6	3225.82	8843.77	2027.67	15002.4	0.179218	5.57981	0.746619
Q8JZU2|TXTP_MOUSE	Tricarboxylate transport protein, mitochondrial OS=Mus musculus OX=10090 GN=Slc25a1 PE=1 SV=1"	3.30566	0.0162925	-1.78801	19625.1	7124.2	19860.2	7456.27	7347.65	1793.27	12500.9	0.363015	2.75471	0.440075
Q9R092|H17B6_MOUSE	17-beta-hydroxysteroid dehydrogenase type 6 OS=Mus musculus OX=10090 GN=Hsd17b6 PE=1 SV=1	3.29643	0.0164811	-1.78301	14676.5	5927.38	16004.8	6707.85	4805	2255.98	8749.13	0.403868	2.47606	0.39376
Q68FF9|S5A1_MOUSE	3-oxo-5-alpha-steroid 4-dehydrogenase 1 OS=Mus musculus OX=10090 GN=Srd5a1 PE=2 SV=2	3.28866	0.0166416	-1.7788	2173.02	115.964	2157.83	104.812	1243.68	135.136	2057.06	0.0533653	18.7388	1.27274
Q9DCF9|SSRG_MOUSE	Translocon-associated protein subunit gamma OS=Mus musculus OX=10090 GN=Ssr3 PE=1 SV=1	3.28449	0.0167286	-1.77654	14436.4	2580.61	16408.2	2564.22	7088.54	1367.62	11855.8	0.178757	5.59417	0.747736
Q9DCV4|RMD1_MOUSE	Regulator of microtubule dynamics protein 1 OS=Mus musculus OX=10090 GN=Rmdn1 PE=1 SV=2	3.27843	0.0168556	-1.77325	1039.16	0	1100.21	0	633.941	0	1039.16	#DIV/0!	0	0
Q68FD5|CLH1_MOUSE	Clathrin heavy chain 1 OS=Mus musculus OX=10090 GN=Cltc PE=1 SV=3	3.27788	0.0168672	-1.77296	15139.5	8051.9	14551.7	8303.8	2392.65	3602.3	7087.59	0.531847	1.88024	0.274213
P28665|MUG1_MOUSE	Murinoglobulin-1 OS=Mus musculus OX=10090 GN=Mug1 PE=1 SV=3	3.26884	0.0170589	-1.76805	16599.8	2179.09	18674.1	2096.78	8785.09	818.191	14420.7	0.131273	7.61773	0.881826
P84091|AP2M1_MOUSE	AP-2 complex subunit mu OS=Mus musculus OX=10090 GN=Ap2m1 PE=1 SV=1	3.26406	0.0171613	-1.76545	11343.2	1835.55	11465.8	1498.4	5750.65	931.812	9507.64	0.16182	6.17972	0.790969
Q61207|SAP_MOUSE	Prosaposin OS=Mus musculus OX=10090 GN=Psap PE=1 SV=2	3.25964	0.0172566	-1.76305	4053.74	373.606	4603.24	415.413	2240.72	278.814	3680.13	0.0921633	10.8503	1.03544
Q9R1J0|NSDHL_MOUSE	Sterol-4-alpha-carboxylate 3-dehydrogenase, decarboxylating OS=Mus musculus OX=10090 GN=Nsdhl PE=1 SV=1"	3.25961	0.0172572	-1.76303	6628.03	1630.65	6882.5	2025.7	2854.44	1119.82	4997.38	0.246023	4.06465	0.609023
Q61176|ARGI1_MOUSE	Arginase-1 OS=Mus musculus OX=10090 GN=Arg1 PE=1 SV=1	3.24593	0.0175556	-1.75558	40594.6	15761.3	39681.9	10537	7312.14	13440.9	24833.3	0.388261	2.57559	0.410877
Q9CXI5|MANF_MOUSE	Mesencephalic astrocyte-derived neurotrophic factor OS=Mus musculus OX=10090 GN=Manf PE=1 SV=1	3.23682	0.0177578	-1.75061	4171.87	1398.08	4884.21	1285.09	1619.07	562.207	2773.79	0.33512	2.984	0.474799
P09671|SODM_MOUSE	Superoxide dismutase [Mn], mitochondrial OS=Mus musculus OX=10090 GN=Sod2 PE=1 SV=3"	3.22548	0.0180126	-1.74442	6026.38	2907.23	5729.62	2428.42	1391.31	1343.45	3119.14	0.482418	2.07289	0.316576
Q8K0R6|GLTD2_MOUSE	Glycolipid transfer protein domain-containing protein 2 OS=Mus musculus OX=10090 GN=Gltpd2 PE=1 SV=1	3.20715	0.0184332	-1.7344	6959.48	337.663	6417.39	386.442	4119.83	281.147	6621.82	0.0485185	20.6107	1.31409
Q9CZ42|NNRD_MOUSE	ATP-dependent (S)-NAD(P)H-hydrate dehydratase OS=Mus musculus OX=10090 GN=Naxd PE=1 SV=1	3.20458	0.0184929	-1.733	1382.35	449.106	1379.1	416.697	425.279	397.97	933.246	0.324885	3.07801	0.48827
P43006|EAA2_MOUSE	Excitatory amino acid transporter 2 OS=Mus musculus OX=10090 GN=Slc1a2 PE=1 SV=1	3.20234	0.0185452	-1.73177	1569.78	570.999	1549.75	406.547	467.814	412.619	998.782	0.363744	2.74919	0.439204
P61027|RAB10_MOUSE	Ras-related protein Rab-10 OS=Mus musculus OX=10090 GN=Rab10 PE=1 SV=1	3.2018	0.0185579	-1.73147	23989.1	10221.1	26368.2	11553.4	7533.9	4147.64	13768	0.426073	2.34702	0.370516
P27659|RL3_MOUSE	60S ribosomal protein L3 OS=Mus musculus OX=10090 GN=Rpl3 PE=1 SV=3	3.20033	0.0185923	-1.73067	44859	5747.29	46622.5	5778.51	24251.1	3051.19	39111.7	0.128119	7.80525	0.892387
Q9JKR6|HYOU1_MOUSE	Hypoxia up-regulated protein 1 OS=Mus musculus OX=10090 GN=Hyou1 PE=1 SV=1	3.19125	0.0188067	-1.72569	42332.3	3392.34	49612.2	3055.7	24387.7	897.738	38940	0.0801359	12.4788	1.09617
P62918|RL8_MOUSE	60S ribosomal protein L8 OS=Mus musculus OX=10090 GN=Rpl8 PE=1 SV=2	3.18424	0.0189738	-1.72184	74514.1	17073.1	71270.7	16734.2	35221.1	7817.75	57441	0.229126	4.36441	0.639926
Q8BW75|AOFB_MOUSE	Amine oxidase [flavin-containing] B OS=Mus musculus OX=10090 GN=Maob PE=1 SV=4	3.18005	0.0190746	-1.71955	70447.8	37344.5	72184	39309.3	15709.6	13662.1	33103.4	0.530101	1.88643	0.275642
O35488|S27A2_MOUSE	Very long-chain acyl-CoA synthetase OS=Mus musculus OX=10090 GN=Slc27a2 PE=1 SV=2	3.17576	0.0191784	-1.71719	189170	42853.1	173610	44824.2	90388.1	17913	146317	0.226532	4.41438	0.64487
Q9QUI0|RHOA_MOUSE	Transforming protein RhoA OS=Mus musculus OX=10090 GN=Rhoa PE=1 SV=1	3.16277	0.0194964	-1.71005	5039.37	899.478	6051.6	1088.41	2536.88	646.193	4139.89	0.17849	5.60255	0.748386
Q8C196|CPSM_MOUSE	Carbamoyl-phosphate synthase [ammonia], mitochondrial OS=Mus musculus OX=10090 GN=Cps1 PE=1 SV=2"	3.14887	0.0198431	-1.70239	1.89346e+06	571822	1667500	521455	832739	105836	1321640	0.301998	3.31128	0.519995
Q8VCI0|PLBL1_MOUSE	Phospholipase B-like 1 OS=Mus musculus OX=10090 GN=Plbd1 PE=1 SV=1	-3.14153	0.0200288	-1.69834	3627.89	10726.8	3348.7	11880.3	1145.7	4371.76	-7098.91	2.95676	0.338208	-0.470816
P56391|CX6B1_MOUSE	Cytochrome c oxidase subunit 6B1 OS=Mus musculus OX=10090 GN=Cox6b1 PE=1 SV=2	3.14105	0.0200411	-1.69808	13906.9	4893.95	13490.7	5020.95	5632.77	1097.94	9012.9	0.351909	2.84164	0.453569
Q9CPP6|NDUA5_MOUSE	NADH dehydrogenase [ubiquinone] 1 alpha subcomplex subunit 5 OS=Mus musculus OX=10090 GN=Ndufa5 PE=1 SV=3	3.13613	0.0201669	-1.69536	3222.91	650.521	3742.18	719.934	1568.31	481.26	2572.39	0.201843	4.95436	0.694987
Q9QZD8|DIC_MOUSE	Mitochondrial dicarboxylate carrier OS=Mus musculus OX=10090 GN=Slc25a10 PE=1 SV=2	3.13506	0.0201943	-1.69477	23943.5	10701.3	25217.6	11339.1	8180.73	2107.45	13242.2	0.44694	2.23744	0.349751
P10605|CATB_MOUSE	Cathepsin B OS=Mus musculus OX=10090 GN=Ctsb PE=1 SV=2	3.1342	0.0202164	-1.6943	5377.04	1596.85	5180.95	1456.21	2125.09	1141.39	3780.19	0.296976	3.36727	0.527278
Q9JIL4|NHRF3_MOUSE	Na(+)_H(+) exchange regulatory cofactor NHE-RF3 OS=Mus musculus OX=10090 GN=Pdzk1 PE=1 SV=1	3.13266	0.0202561	-1.69344	8792.07	1392.19	8177.63	1247.63	4697.01	507.485	7399.88	0.158346	6.31529	0.800393
P26039|TLN1_MOUSE	Talin-1 OS=Mus musculus OX=10090 GN=Tln1 PE=1 SV=2	3.12945	0.0203388	-1.69168	2430.85	142.248	2100.5	123.3	1453.04	167.143	2288.6	0.0585178	17.0888	1.23271
Q9R1S7|MRP6_MOUSE	ATP-binding cassette sub-family C member 6 OS=Mus musculus OX=10090 GN=Abcc6 PE=1 SV=3	3.12844	0.0203649	-1.69112	5789.1	1594.36	5099.65	1360.92	2555.15	814.039	4194.75	0.275406	3.631	0.560026
Q9JJW0|PXMP4_MOUSE	Peroxisomal membrane protein 4 OS=Mus musculus OX=10090 GN=Pxmp4 PE=1 SV=3	-3.12091	0.0205611	-1.68695	9106.54	38380.6	9312.25	29282.7	2168.05	18634.3	-29274.1	4.21462	0.237269	-0.624758
O08756|HCD2_MOUSE	3-hydroxyacyl-CoA dehydrogenase type-2 OS=Mus musculus OX=10090 GN=Hsd17b10 PE=1 SV=4	3.11812	0.0206344	-1.68541	27686.4	6283.73	30084.8	4595.78	12997.4	4418.81	21402.7	0.226961	4.40605	0.644049
Q8C7X2|EMC1_MOUSE	ER membrane protein complex subunit 1 OS=Mus musculus OX=10090 GN=Emc1 PE=1 SV=1	3.11717	0.0206594	-1.68488	5535.08	1062.92	5246.17	842.423	2806.61	596.847	4472.15	0.192034	5.20741	0.716622
P55096|ABCD3_MOUSE	ATP-binding cassette sub-family D member 3 OS=Mus musculus OX=10090 GN=Abcd3 PE=1 SV=2	-3.11534	0.0207075	-1.68387	106966	609218	106961	499185	12582.9	322192	-502251	5.69541	0.17558	-0.755525
P39054|DYN2_MOUSE	Dynamin-2 OS=Mus musculus OX=10090 GN=Dnm2 PE=1 SV=2	3.11225	0.020789	-1.68217	17512.5	3317.21	18142	2449.08	8892.83	2032.74	14195.3	0.189419	5.27929	0.722576
Q9CZM2|RL15_MOUSE	60S ribosomal protein L15 OS=Mus musculus OX=10090 GN=Rpl15 PE=1 SV=4	3.11074	0.0208292	-1.68133	41825	8128.34	44430.4	7258.55	21447.8	3057.72	33696.6	0.194342	5.14557	0.711433
O08600|NUCG_MOUSE	Endonuclease G, mitochondrial OS=Mus musculus OX=10090 GN=Endog PE=1 SV=1"	3.11033	0.0208402	-1.6811	2466.41	172.791	2727.1	69.2499	1451.47	261.529	2293.62	0.0700577	14.2739	1.15454
P62830|RL23_MOUSE	60S ribosomal protein L23 OS=Mus musculus OX=10090 GN=Rpl23 PE=1 SV=1	3.09992	0.0211186	-1.67534	16192.1	1722.31	16835.9	1063.05	9215.53	1492.53	14469.8	0.106367	9.40142	0.973194
P47915|RL29_MOUSE	60S ribosomal protein L29 OS=Mus musculus OX=10090 GN=Rpl29 PE=1 SV=2	3.09238	0.021323	-1.67115	9970.83	1271.28	10917.6	1278.12	5517.63	1101.19	8699.55	0.1275	7.84314	0.89449
Q8BNI4|DERL2_MOUSE	Derlin-2 OS=Mus musculus OX=10090 GN=Derl2 PE=1 SV=2	3.08844	0.0214305	-1.66897	2125.93	103.196	2570.08	0	1293.51	206.391	2022.73	0.0485414	20.601	1.31389
Q9EST5|AN32B_MOUSE	Acidic leucine-rich nuclear phosphoprotein 32 family member B OS=Mus musculus OX=10090 GN=Anp32b PE=1 SV=1	-3.08657	0.0214818	-1.66793	16964.5	54862.1	16313.3	51270.4	8523.84	23029.6	-37897.6	3.23393	0.309221	-0.509731
E9PV24|FIBA_MOUSE	Fibrinogen alpha chain OS=Mus musculus OX=10090 GN=Fga PE=1 SV=1	3.08474	0.0215322	-1.66691	10532.3	1093.39	10617.4	907.93	6096.31	535.449	9438.95	0.103813	9.63271	0.983748
P01898|HA10_MOUSE	H-2 class I histocompatibility antigen, Q10 alpha chain OS=Mus musculus OX=10090 GN=H2-Q10 PE=1 SV=3"	3.07884	0.0216951	-1.66364	3910.24	482.013	3107.2	484.229	2219.22	185.491	3428.23	0.123269	8.11232	0.909145
Q8R2Q4|RRF2M_MOUSE	Ribosome-releasing factor 2, mitochondrial OS=Mus musculus OX=10090 GN=Gfm2 PE=1 SV=2"	3.07698	0.021747	-1.6626	503.53	137.998	467.962	104.77	167.674	168.331	365.533	0.27406	3.64883	0.562154
Q60930|VDAC2_MOUSE	Voltage-dependent anion-selective channel protein 2 OS=Mus musculus OX=10090 GN=Vdac2 PE=1 SV=2	3.07599	0.0217744	-1.66205	29865.2	11002.9	29225.8	10592.5	9395.58	7882.48	18862.3	0.368419	2.7143	0.433658
P50516|VATA_MOUSE	V-type proton ATPase catalytic subunit A OS=Mus musculus OX=10090 GN=Atp6v1a PE=1 SV=2	-3.06624	0.022048	-1.65663	564.009	2028.17	436.661	2329	337.985	893.217	-1464.17	3.59599	0.278087	-0.555819
P12791|CP2BA_MOUSE	Cytochrome P450 2B10 OS=Mus musculus OX=10090 GN=Cyp2b10 PE=1 SV=1	3.06429	0.0221032	-1.65554	8461.38	977.813	7918.88	984.433	4866.08	422.428	7483.57	0.115562	8.65337	0.937185
P62984|RL40_MOUSE	Ubiquitin-60S ribosomal protein L40 OS=Mus musculus OX=10090 GN=Uba52 PE=1 SV=2	3.05704	0.0223094	-1.65151	22739.1	10371.6	21863.3	10617.2	6086.8	5330.81	12367.5	0.456114	2.19244	0.340927
O35604|NPC1_MOUSE	NPC intracellular cholesterol transporter 1 OS=Mus musculus OX=10090 GN=Npc1 PE=1 SV=2	3.04543	0.0226444	-1.64504	4008.49	1359.38	4514.15	1402.68	1564.08	761.794	2649.11	0.339125	2.94877	0.469641
Q9CXW4|RL11_MOUSE	60S ribosomal protein L11 OS=Mus musculus OX=10090 GN=Rpl11 PE=1 SV=4	3.03503	0.022949	-1.63924	20149.3	2467.11	22778.6	2677.4	11593.7	1164.62	17682.2	0.122441	8.16718	0.912072
P01027|CO3_MOUSE	Complement C3 OS=Mus musculus OX=10090 GN=C3 PE=1 SV=3	3.03494	0.0229518	-1.63918	42600.4	6226.79	39568.3	4214.94	22848	7247.79	36373.7	0.146167	6.84148	0.83515
O55125|NIPS1_MOUSE	Protein NipSnap homolog 1 OS=Mus musculus OX=10090 GN=Nipsnap1 PE=1 SV=1	3.02624	0.0232099	-1.63433	25854.8	12513.2	24320.8	12429	8025.98	3650.77	13341.6	0.483979	2.0662	0.315173
Q99J47|DRS7B_MOUSE	Dehydrogenase_reductase SDR family member 7B OS=Mus musculus OX=10090 GN=Dhrs7b PE=1 SV=1	-3.00698	0.0237929	-1.62355	4413.88	15648.9	4181.89	13658.2	3933.35	6353.68	-11235.1	3.54539	0.282056	-0.549664
Q71KT5|ERG24_MOUSE	Delta(14)-sterol reductase TM7SF2 OS=Mus musculus OX=10090 GN=Tm7sf2 PE=1 SV=2	3.00288	0.0239192	-1.62125	5511.74	502.403	4123.8	584.997	3315.23	374.857	5009.34	0.0911514	10.9708	1.04024
Q8VEB4|PAG15_MOUSE	Phospholipase A2 group XV OS=Mus musculus OX=10090 GN=Pla2g15 PE=1 SV=1	2.98961	0.0243326	-1.61381	2447.62	560.798	2212.08	608.608	1245	208.005	1886.82	0.22912	4.36453	0.639937
P62862|RS30_MOUSE	40S ribosomal protein S30 OS=Mus musculus OX=10090 GN=Fau PE=1 SV=1	2.98642	0.024433	-1.61202	6095.03	1218.32	5945.7	1105.43	3154.27	846.655	4876.7	0.199888	5.00279	0.699213
P14211|CALR_MOUSE	Calreticulin OS=Mus musculus OX=10090 GN=Calr PE=1 SV=1	2.98164	0.0245844	-1.60934	67761.5	23748.4	69240	19441.9	16679	24359.8	44013	0.350471	2.8533	0.455348
P25911|LYN_MOUSE	Tyrosine-protein kinase Lyn OS=Mus musculus OX=10090 GN=Lyn PE=1 SV=4	2.97614	0.0247599	-1.60625	7272.31	2339.35	7721.36	2138.44	2756.49	1841.48	4932.96	0.321679	3.10869	0.492578
Q6ZQI3|MLEC_MOUSE	Malectin OS=Mus musculus OX=10090 GN=Mlec PE=1 SV=2	2.97533	0.0247858	-1.6058	9826.59	2172.21	9685.04	2008.91	4978.22	1300.25	7654.38	0.221054	4.52378	0.655502
Q9EQ06|DHB11_MOUSE	Estradiol 17-beta-dehydrogenase 11 OS=Mus musculus OX=10090 GN=Hsd17b11 PE=1 SV=1	2.96431	0.0251421	-1.5996	8886.42	1744.11	10609	1521.94	4705.63	1038.53	7142.31	0.196266	5.09511	0.707154
Q8BHI7|ELOV5_MOUSE	Elongation of very long chain fatty acids protein 5 OS=Mus musculus OX=10090 GN=Elovl5 PE=1 SV=1	2.96029	0.0252733	-1.59734	2264.8	188.404	2604.94	207.168	1395.73	140.954	2076.4	0.083188	12.021	1.07994
P58137|ACOT8_MOUSE	Acyl-coenzyme A thioesterase 8 OS=Mus musculus OX=10090 GN=Acot8 PE=1 SV=1	-2.95783	0.0253542	-1.59595	2464.45	19039.6	2187.05	18302.2	1071.66	11156.3	-16575.2	7.7257	0.129438	-0.887938
Q6P6M5|PX11C_MOUSE	Peroxisomal membrane protein 11C OS=Mus musculus OX=10090 GN=Pex11g PE=1 SV=2	-2.94349	0.0258305	-1.58787	4011.36	17432.9	3612.97	18637.5	1092.17	9053.87	-13421.6	4.34589	0.230102	-0.638079
Q9D2G2|ODO2_MOUSE	Dihydrolipoyllysine-residue succinyltransferase component of 2-oxoglutarate dehydrogenase complex, mitochondrial OS=Mus musculus OX=10090 GN=Dlst PE=1 SV=1"	2.92502	0.026458	-1.57744	43326.1	15860.2	38903.1	18567.8	15278	10921.1	27465.9	0.366065	2.73176	0.436442
Q80UU9|PGRC2_MOUSE	Membrane-associated progesterone receptor component 2 OS=Mus musculus OX=10090 GN=Pgrmc2 PE=1 SV=2	2.9238	0.0264998	-1.57676	9870.1	1872.96	8385.39	1571.82	5402.02	862.051	7997.14	0.189761	5.26979	0.721793
Q5XG73|ACBD5_MOUSE	Acyl-CoA-binding domain-containing protein 5 OS=Mus musculus OX=10090 GN=Acbd5 PE=1 SV=1	-2.92207	0.0265597	-1.57578	16422.4	33735.2	16495.9	33783.9	6424.13	9957.21	-17312.8	2.05422	0.486803	-0.312647
Q9WUZ9|ENTP5_MOUSE	Ectonucleoside triphosphate diphosphohydrolase 5 OS=Mus musculus OX=10090 GN=Entpd5 PE=1 SV=1	2.91925	0.0266573	-1.57418	28595.3	3195.81	29631.1	2288.33	17038.5	3535.07	25399.5	0.11176	8.94775	0.951714
P99029|PRDX5_MOUSE	Peroxiredoxin-5, mitochondrial OS=Mus musculus OX=10090 GN=Prdx5 PE=1 SV=2"	-2.91626	0.0267614	-1.57249	43718.1	132339	43201.2	127760	10104.8	59931.4	-88621.2	3.0271	0.330349	-0.481027
Q8C5H8|NAKD2_MOUSE	NAD kinase 2, mitochondrial OS=Mus musculus OX=10090 GN=Nadk2 PE=1 SV=2"	2.91322	0.0268675	-1.57077	4508.75	911.246	4181.73	949.306	2414.73	518.567	3597.51	0.202106	4.9479	0.694421
Q80WJ7|LYRIC_MOUSE	Protein LYRIC OS=Mus musculus OX=10090 GN=Mtdh PE=1 SV=1	2.90943	0.0270004	-1.56863	25479.1	1275.33	32954	933.429	16580.8	1381.08	24203.8	0.0500539	19.9785	1.30056
O88342|WDR1_MOUSE	WD repeat-containing protein 1 OS=Mus musculus OX=10090 GN=Wdr1 PE=1 SV=3	2.89841	0.0273914	-1.56239	5515.03	851.434	5527.97	717.414	3189.06	430.915	4663.59	0.154384	6.47734	0.811397
P35564|CALX_MOUSE	Calnexin OS=Mus musculus OX=10090 GN=Canx PE=1 SV=1	2.89571	0.0274878	-1.56086	7273	1423.96	7904.4	1582.92	3893.43	1077.53	5849.04	0.195787	5.10759	0.708216
P60867|RS20_MOUSE	40S ribosomal protein S20 OS=Mus musculus OX=10090 GN=Rps20 PE=1 SV=1	2.88169	0.0279958	-1.55291	5073.71	559.172	5003.2	440.278	3110.82	374.256	4514.54	0.11021	9.07362	0.95778
Q571F8|GLSL_MOUSE	Glutaminase liver isoform, mitochondrial OS=Mus musculus OX=10090 GN=Gls2 PE=1 SV=2"	2.8814	0.0280065	-1.55274	5784.79	2504.43	5650.9	1814.27	1666.83	1551.15	3280.36	0.432934	2.30982	0.363579
Q9ESB3|HRG_MOUSE	Histidine-rich glycoprotein OS=Mus musculus OX=10090 GN=Hrg PE=1 SV=2	2.87778	0.0281393	-1.55069	1078	70.3425	1133.54	0	686.029	140.685	1007.66	0.0652525	15.3251	1.1854
Q8BWF0|SSDH_MOUSE	Succinate-semialdehyde dehydrogenase, mitochondrial OS=Mus musculus OX=10090 GN=Aldh5a1 PE=1 SV=1"	2.87173	0.0283627	-1.54725	4089.13	744.964	3882.31	750.055	2241.81	631.364	3344.17	0.182182	5.48903	0.739496
Q9JMA7|CP341_MOUSE	Cytochrome P450 3A41 OS=Mus musculus OX=10090 GN=Cyp3a41a PE=1 SV=2	2.87055	0.0284066	-1.54658	14740.6	1016.7	16841.4	770.155	9497.24	1109.99	13723.9	0.0689728	14.4985	1.16132
P12970|RL7A_MOUSE	60S ribosomal protein L7a OS=Mus musculus OX=10090 GN=Rpl7a PE=1 SV=2	2.85241	0.0290896	-1.53626	62660.4	9774.11	72927.2	11008	36862.7	4025.1	52886.3	0.155986	6.41085	0.806916
P11859|ANGT_MOUSE	Angiotensinogen OS=Mus musculus OX=10090 GN=Agt PE=1 SV=1	2.85143	0.029127	-1.5357	1187.04	202.8	1171.65	184.977	648.763	235.975	984.236	0.170846	5.85324	0.767396
Q9D1R9|RL34_MOUSE	60S ribosomal protein L34 OS=Mus musculus OX=10090 GN=Rpl34 PE=1 SV=2	2.84345	0.0294336	-1.53116	25419.9	5190.54	22508.6	4772.27	13891.4	3080.11	20229.4	0.204192	4.89735	0.689961
P35700|PRDX1_MOUSE	Peroxiredoxin-1 OS=Mus musculus OX=10090 GN=Prdx1 PE=1 SV=1	2.83815	0.0296388	-1.52814	595365	148594	492670	121125	299479	97118.9	446771	0.249584	4.00666	0.602783
Q9DCM0|ETHE1_MOUSE	Persulfide dioxygenase ETHE1, mitochondrial OS=Mus musculus OX=10090 GN=Ethe1 PE=1 SV=2"	2.83403	0.0297996	-1.52579	6206.83	2446.48	5775.62	2848.22	2377.33	1179.19	3760.34	0.39416	2.53704	0.404328
Q9WUR2|ECI2_MOUSE	Enoyl-CoA delta isomerase 2 OS=Mus musculus OX=10090 GN=Eci2 PE=1 SV=2	-2.83393	0.0298034	-1.52573	11387.5	52241.3	12079.7	48614.6	3151.96	28659.1	-40853.8	4.5876	0.217979	-0.661586
Q9EP69|SAC1_MOUSE	Phosphatidylinositol-3-phosphatase SAC1 OS=Mus musculus OX=10090 GN=Sacm1l PE=1 SV=1	2.81999	0.0303546	-1.51778	10491.4	2332.09	10552.1	1978.62	5593.26	1483.86	8159.28	0.222286	4.4987	0.653087
Q8CFA2|GCST_MOUSE	Aminomethyltransferase, mitochondrial OS=Mus musculus OX=10090 GN=Amt PE=1 SV=1"	2.81568	0.0305271	-1.51531	1216.19	813.9	1191.27	750.142	170.888	229.017	402.287	0.669223	1.49427	0.174429
Q9QXY9|PEX3_MOUSE	Peroxisomal biogenesis factor 3 OS=Mus musculus OX=10090 GN=Pex3 PE=1 SV=1	-2.81517	0.0305477	-1.51502	1710.69	8751.31	890.689	8612.8	1885.01	4633.13	-7040.62	5.11567	0.195478	-0.708903
O88844|IDHC_MOUSE	Isocitrate dehydrogenase [NADP] cytoplasmic OS=Mus musculus OX=10090 GN=Idh1 PE=1 SV=2	-2.81464	0.030569	-1.51472	51099.4	264647	50885	227820	6286.4	151610	-213548	5.17906	0.193085	-0.714251
O35114|SCRB2_MOUSE	Lysosome membrane protein 2 OS=Mus musculus OX=10090 GN=Scarb2 PE=1 SV=3	2.7959	0.0313328	-1.504	6069.29	1372.12	6512.95	1205.08	3241.54	884.485	4697.18	0.226075	4.42331	0.645747
P62751|RL23A_MOUSE	60S ribosomal protein L23a OS=Mus musculus OX=10090 GN=Rpl23a PE=1 SV=1	2.79528	0.0313585	-1.50364	26521.3	3933.37	25820.5	3195.25	15905.7	2864.01	22587.9	0.14831	6.74264	0.82883
Q8BP40|PPA6_MOUSE	Lysophosphatidic acid phosphatase type 6 OS=Mus musculus OX=10090 GN=Acp6 PE=1 SV=1	2.79159	0.0315114	-1.50153	1076.5	432.37	1060.31	467.784	299.796	350.832	644.127	0.401645	2.48976	0.396158
Q9EPL9|ACOX3_MOUSE	Peroxisomal acyl-coenzyme A oxidase 3 OS=Mus musculus OX=10090 GN=Acox3 PE=1 SV=2	-2.79158	0.031512	-1.50152	3931.12	17760.1	3418.72	14452.5	1398.71	9808.4	-13828.9	4.51781	0.221346	-0.654928
Q9D8E6|RL4_MOUSE	60S ribosomal protein L4 OS=Mus musculus OX=10090 GN=Rpl4 PE=1 SV=3	2.78449	0.031808	-1.49746	39307.5	6619.47	40297.2	5932.23	23327.8	2657.88	32688.1	0.168402	5.93817	0.773652
Q3ULJ0|GPD1L_MOUSE	Glycerol-3-phosphate dehydrogenase 1-like protein OS=Mus musculus OX=10090 GN=Gpd1l PE=1 SV=2	-2.77887	0.0320447	-1.49424	0	4383	0	5101.32	0	3154.52	-4383	#DIV/0!	0	0
P47199|QOR_MOUSE	Quinone oxidoreductase OS=Mus musculus OX=10090 GN=Cryz PE=1 SV=1	2.77881	0.0320474	-1.49421	5015.44	997.26	6118.37	1089.91	2790.33	760.134	4018.18	0.198838	5.02922	0.701501
Q62167|DDX3X_MOUSE	ATP-dependent RNA helicase DDX3X OS=Mus musculus OX=10090 GN=Ddx3x PE=1 SV=3	2.775	0.0322092	-1.49202	2607.78	970.551	2428.59	889.082	1102.89	419.54	1637.23	0.372175	2.68691	0.429253
P12787|COX5A_MOUSE	Cytochrome c oxidase subunit 5A, mitochondrial OS=Mus musculus OX=10090 GN=Cox5a PE=1 SV=2"	2.76854	0.0324853	-1.48831	1736.76	646.21	1855.57	643.398	575.157	538.38	1090.55	0.372077	2.68761	0.429367
E9Q414|APOB_MOUSE	Apolipoprotein B-100 OS=Mus musculus OX=10090 GN=Apob PE=1 SV=1	2.76253	0.0327441	-1.48487	14014.6	3612.48	13234.4	3321.88	7215.93	2155.11	10402.2	0.257765	3.8795	0.588776
Q8CCJ3|UFL1_MOUSE	E3 UFM1-protein ligase 1 OS=Mus musculus OX=10090 GN=Ufl1 PE=1 SV=2	2.75687	0.0329905	-1.48161	6064.61	1344.7	6587.61	1437.09	3338.59	760.498	4719.91	0.221729	4.51002	0.654178
Q9CQ54|NDUC2_MOUSE	NADH dehydrogenase [ubiquinone] 1 subunit C2 OS=Mus musculus OX=10090 GN=Ndufc2 PE=1 SV=1	2.74913	0.0333302	-1.47716	673.081	172.088	702.791	145.61	302.467	203.36	500.993	0.255672	3.91126	0.592317
Q9CQ69|QCR8_MOUSE	Cytochrome b-c1 complex subunit 8 OS=Mus musculus OX=10090 GN=Uqcrq PE=1 SV=3	2.7369	0.0338745	-1.47013	25364.8	8119.49	24833.7	7235.84	12468.7	1828.66	17245.3	0.320108	3.12394	0.494703
Q9QY76|VAPB_MOUSE	Vesicle-associated membrane protein-associated protein B OS=Mus musculus OX=10090 GN=Vapb PE=1 SV=3	2.73494	0.0339628	-1.469	24076.6	10617.3	25591	9886.31	8596.35	4793.48	13459.3	0.44098	2.26768	0.355581
Q9WU79|PROD_MOUSE	Proline dehydrogenase 1, mitochondrial OS=Mus musculus OX=10090 GN=Prodh PE=1 SV=2"	2.72971	0.0341991	-1.46599	13143.2	3620.58	11144.3	3572.18	6962.32	452.426	9522.6	0.275472	3.63013	0.559923
Q99LP6|GRPE1_MOUSE	GrpE protein homolog 1, mitochondrial OS=Mus musculus OX=10090 GN=Grpel1 PE=1 SV=1"	2.72518	0.0344055	-1.46337	3252.5	604.389	2918.53	652.91	1881.49	486.784	2648.11	0.185823	5.38147	0.730901
Q8BGS7|CEPT1_MOUSE	Choline_ethanolaminephosphotransferase 1 OS=Mus musculus OX=10090 GN=Cept1 PE=1 SV=1	2.71675	0.0347929	-1.45851	12334	743.374	14359.4	657.076	8519.49	475.715	11590.7	0.0602701	16.592	1.2199
Q9WTP7|KAD3_MOUSE	GTP:AMP phosphotransferase AK3, mitochondrial OS=Mus musculus OX=10090 GN=Ak3 PE=1 SV=3"	2.7153	0.0348599	-1.45767	9152.48	2042.48	7494.9	1914.19	5168.81	842.381	7110.01	0.223161	4.48107	0.651382
P12710|FABPL_MOUSE	Fatty acid-binding protein, liver OS=Mus musculus OX=10090 GN=Fabp1 PE=1 SV=2"	2.70756	0.0352204	-1.45321	111135	45184.2	112188	38793.4	41517	25487.3	65950.9	0.40657	2.4596	0.390865
P62835|RAP1A_MOUSE	Ras-related protein Rap-1A OS=Mus musculus OX=10090 GN=Rap1a PE=1 SV=1	2.70446	0.0353655	-1.45142	48426.6	13909.6	52370.1	16485.7	24270.3	7907.61	34517	0.28723	3.48153	0.54177
P50427|STS_MOUSE	Steryl-sulfatase OS=Mus musculus OX=10090 GN=Sts PE=1 SV=1	2.68283	0.0363985	-1.43892	9127.41	1153.59	10994.2	828.354	5905.18	681.005	7973.81	0.126388	7.91216	0.898295
Q8VCH6|DHC24_MOUSE	Delta(24)-sterol reductase OS=Mus musculus OX=10090 GN=Dhcr24 PE=1 SV=1	2.68279	0.0364004	-1.43889	8909	1500.69	9424.91	1418.24	5517.92	232.93	7408.31	0.168447	5.9366	0.773538
Q64176|EST1E_MOUSE	Carboxylesterase 1E OS=Mus musculus OX=10090 GN=Ces1e PE=1 SV=1	2.68175	0.0364512	-1.43829	3355.01	909.859	2670.2	1039.32	1695.53	671.207	2445.15	0.271194	3.68739	0.56672
Q02819|NUCB1_MOUSE	Nucleobindin-1 OS=Mus musculus OX=10090 GN=Nucb1 PE=1 SV=2	2.67907	0.0365815	-1.43674	2549.97	727.49	2416.45	668.483	1316.79	342.221	1822.48	0.285293	3.50516	0.544708
O35643|AP1B1_MOUSE	AP-1 complex subunit beta-1 OS=Mus musculus OX=10090 GN=Ap1b1 PE=1 SV=2	2.6773	0.0366679	-1.43571	2511.75	388.536	2954.31	425.107	1558.73	293.3	2123.21	0.154687	6.46465	0.810545
P01029|CO4B_MOUSE	Complement C4-B OS=Mus musculus OX=10090 GN=C4b PE=1 SV=3	2.67587	0.036738	-1.43488	5962.7	730.911	6075.64	630.471	3900.42	278.546	5231.79	0.12258	8.15791	0.911579
Q61171|PRDX2_MOUSE	Peroxiredoxin-2 OS=Mus musculus OX=10090 GN=Prdx2 PE=1 SV=3	2.66731	0.0371595	-1.42993	18615.8	6441.3	19871.6	6245.69	8896.54	2045.59	12174.5	0.346012	2.89007	0.460909
Q9CQN1|TRAP1_MOUSE	Heat shock protein 75 kDa, mitochondrial OS=Mus musculus OX=10090 GN=Trap1 PE=1 SV=1"	2.66392	0.037328	-1.42797	7316.48	4074.44	7504.34	3825.54	709.009	2328.48	3242.04	0.556885	1.7957	0.254234
A2AKK5|ACNT1_MOUSE	Acyl-coenzyme A amino acid N-acyltransferase 1 OS=Mus musculus OX=10090 GN=Acnat1 PE=1 SV=1	-2.66245	0.0374014	-1.42711	2042.02	11912.6	2227.41	12468.1	440.029	7401.56	-9870.54	5.83372	0.171417	-0.765946
Q9Z210|PX11B_MOUSE	Peroxisomal membrane protein 11B OS=Mus musculus OX=10090 GN=Pex11b PE=1 SV=1	-2.66049	0.0374997	-1.42597	3228.54	9069.53	3161.56	10088.1	1074.54	4257.41	-5840.99	2.80918	0.355976	-0.448579
P56379|ATP68_MOUSE	ATP synthase subunit ATP5MJ, mitochondrial OS=Mus musculus OX=10090 GN=Atp5mj PE=1 SV=1"	2.65207	0.0379238	-1.42109	2533.05	570.98	2812.31	527.861	1366.7	567.029	1962.07	0.225412	4.43632	0.647023
P57716|NICA_MOUSE	Nicastrin OS=Mus musculus OX=10090 GN=Ncstn PE=1 SV=3	2.64665	0.0381992	-1.41795	1974.91	33.54	1978.25	0	1465.51	67.08	1941.37	0.016983	58.8822	1.76998
Q9QYF1|RDH11_MOUSE	Retinol dehydrogenase 11 OS=Mus musculus OX=10090 GN=Rdh11 PE=1 SV=2	2.64306	0.0383828	-1.41586	13822.7	4567.07	15123.2	5066.92	6734.81	1922.18	9255.67	0.330403	3.02661	0.480956
P09055|ITB1_MOUSE	Integrin beta-1 OS=Mus musculus OX=10090 GN=Itgb1 PE=1 SV=1	2.64219	0.0384278	-1.41535	10789.9	1000.47	10288.1	875.314	7361.73	845.233	9789.43	0.0927225	10.7849	1.03281
P30999|CTND1_MOUSE	Catenin delta-1 OS=Mus musculus OX=10090 GN=Ctnnd1 PE=1 SV=2	2.64204	0.0384356	-1.41527	6021.16	694.919	6909.57	757.16	4024.42	245.808	5326.24	0.115413	8.66455	0.937746
P11930|NUD19_MOUSE	Nucleoside diphosphate-linked moiety X motif 19 OS=Mus musculus OX=10090 GN=Nudt19 PE=1 SV=2	-2.62945	0.0390884	-1.40795	3294.05	42658.4	3258.69	33666	1795.33	29887.2	-39364.3	12.9501	0.0772192	-1.11227
P84099|RL19_MOUSE	60S ribosomal protein L19 OS=Mus musculus OX=10090 GN=Rpl19 PE=1 SV=1	2.6294	0.0390909	-1.40792	17364.3	4172.34	19676.7	3618.96	9879.79	1753.52	13192	0.240282	4.16177	0.619278
Q91WD5|NDUS2_MOUSE	NADH dehydrogenase [ubiquinone] iron-sulfur protein 2, mitochondrial OS=Mus musculus OX=10090 GN=Ndufs2 PE=1 SV=1"	2.62669	0.0392332	-1.40635	4252.22	2094.76	4850.38	2126.33	1607.79	336.963	2157.46	0.492628	2.02993	0.307481
P83882|RL36A_MOUSE	60S ribosomal protein L36a OS=Mus musculus OX=10090 GN=Rpl36a PE=3 SV=2	2.61998	0.0395875	-1.40244	15317	2191.53	16705.6	1988.44	10000.6	615.412	13125.4	0.143079	6.98917	0.844426
Q925I1|ATAD3_MOUSE	ATPase family AAA domain-containing protein 3 OS=Mus musculus OX=10090 GN=Atad3 PE=1 SV=1	2.61803	0.039691	-1.40131	4240.22	1744.63	4416.17	1517.75	1594.19	1045.55	2495.59	0.411448	2.43044	0.385685
P45591|COF2_MOUSE	Cofilin-2 OS=Mus musculus OX=10090 GN=Cfl2 PE=1 SV=1	2.61078	0.0400784	-1.39709	2649.82	382.221	2611.78	324.311	1697.98	366.601	2267.6	0.144244	6.93269	0.840902
Q91V92|ACLY_MOUSE	ATP-citrate synthase OS=Mus musculus OX=10090 GN=Acly PE=1 SV=1	2.60446	0.0404194	-1.39341	9508.92	1925.24	7446.58	2203.68	5648.53	1417.2	7583.68	0.202466	4.93909	0.693647
P47955|RLA1_MOUSE	60S acidic ribosomal protein P1 OS=Mus musculus OX=10090 GN=Rplp1 PE=1 SV=1	2.59332	0.0410286	-1.38691	9113.84	1294.74	11156.9	879.747	5896.47	1262.83	7819.1	0.142063	7.03913	0.847519
P61358|RL27_MOUSE	60S ribosomal protein L27 OS=Mus musculus OX=10090 GN=Rpl27 PE=1 SV=2	2.58913	0.0412599	-1.38447	40494.5	10070.8	45335.4	10678.8	23266.3	3313.64	30423.7	0.248695	4.02098	0.604332
Q91Y97|ALDOB_MOUSE	Fructose-bisphosphate aldolase B OS=Mus musculus OX=10090 GN=Aldob PE=1 SV=3	2.58145	0.0416882	-1.37999	168095	60608.4	166430	36790.7	55755.5	61856.7	107487	0.36056	2.77346	0.443022
P14152|MDHC_MOUSE	Malate dehydrogenase, cytoplasmic OS=Mus musculus OX=10090 GN=Mdh1 PE=1 SV=3"	-2.58136	0.0416934	-1.37993	24422.1	75217.9	23469.5	61965.7	4354.68	39114.2	-50795.7	3.07991	0.324685	-0.488538
Q99K51|PLST_MOUSE	Plastin-3 OS=Mus musculus OX=10090 GN=Pls3 PE=1 SV=3	2.57311	0.0421582	-1.37512	7589.42	1809.79	6616.03	1233.96	4217.92	1546.01	5779.63	0.238462	4.19354	0.62258
Q9CQW0|EMC6_MOUSE	ER membrane protein complex subunit 6 OS=Mus musculus OX=10090 GN=Emc6 PE=1 SV=1	2.55029	0.0434738	-1.36177	1330.14	637.167	1300.38	655.035	318.219	440.537	692.974	0.479022	2.08759	0.319644
P55302|AMRP_MOUSE	Alpha-2-macroglobulin receptor-associated protein OS=Mus musculus OX=10090 GN=Lrpap1 PE=1 SV=1	2.5486	0.0435728	-1.36078	4238.36	1924.66	4435.36	1909.65	1497.61	1026.54	2313.7	0.454105	2.20214	0.342844
Q9ET30|TM9S3_MOUSE	Transmembrane 9 superfamily member 3 OS=Mus musculus OX=10090 GN=Tm9sf3 PE=1 SV=1	2.5437	0.0438614	-1.35792	16518.8	664.102	17219	645.628	12461.9	312.662	15854.7	0.0402029	24.8738	1.39574
Q99J39|DCMC_MOUSE	Malonyl-CoA decarboxylase, mitochondrial OS=Mus musculus OX=10090 GN=Mlycd PE=1 SV=1"	-2.52836	0.0447784	-1.34893	1778.77	4605.33	1802.19	5431.13	126.475	2232.3	-2826.56	2.58905	0.386242	-0.413141
P01887|B2MG_MOUSE	Beta-2-microglobulin OS=Mus musculus OX=10090 GN=B2m PE=1 SV=2	2.52456	0.0450088	-1.3467	8725.92	1887.04	8453.55	1225.26	5230.38	1412.97	6838.88	0.216257	4.62413	0.66503
Q9D5T0|ATAD1_MOUSE	Outer mitochondrial transmembrane helix translocase OS=Mus musculus OX=10090 GN=Atad1 PE=1 SV=1	-2.5233	0.0450858	-1.34596	8874.9	26808.4	8330.9	22027.9	5679.86	13030.2	-17933.5	3.02069	0.33105	-0.480107
P06151|LDHA_MOUSE	L-lactate dehydrogenase A chain OS=Mus musculus OX=10090 GN=Ldha PE=1 SV=3	-2.51485	0.0456035	-1.341	24137.6	94677.7	23316.5	71624.7	8882.17	55391.4	-70540.2	3.92242	0.254944	-0.593555
Q8VCR7|ABHEB_MOUSE	Protein ABHD14B OS=Mus musculus OX=10090 GN=Abhd14b PE=1 SV=1	-2.50522	0.0462006	-1.33535	8023.64	37510.8	7637.02	30530.9	2581.61	23398.5	-29487.1	4.67503	0.213902	-0.669785
Q61009|SCRB1_MOUSE	Scavenger receptor class B member 1 OS=Mus musculus OX=10090 GN=Scarb1 PE=1 SV=1	2.5048	0.0462272	-1.3351	13088.4	3391.93	11195.3	3244.13	7537.53	1768.99	9696.49	0.259155	3.85869	0.58644
Q62261|SPTB2_MOUSE	Spectrin beta chain, non-erythrocytic 1 OS=Mus musculus OX=10090 GN=Sptbn1 PE=1 SV=2"	2.50218	0.0463912	-1.33356	5584.07	635.604	6066.02	392.214	3877.81	779.204	4948.47	0.113825	8.78545	0.943764
B1AUE5|PEX10_MOUSE	Peroxisome biogenesis factor 10 OS=Mus musculus OX=10090 GN=Pex10 PE=2 SV=1	-2.49205	0.0470315	-1.32761	2325.48	8752.52	2323.01	7546.57	1646.67	4888.12	-6427.03	3.76374	0.265693	-0.57562
Q9CPW4|ARPC5_MOUSE	Actin-related protein 2_3 complex subunit 5 OS=Mus musculus OX=10090 GN=Arpc5 PE=1 SV=3	2.49141	0.0470721	-1.32724	4317.7	250.177	4470.28	256.387	3259.01	201.487	4067.53	0.0579422	17.2586	1.23701
P15535|B4GT1_MOUSE	Beta-1,4-galactosyltransferase 1 OS=Mus musculus OX=10090 GN=B4galt1 PE=1 SV=1"	2.48895	0.0472292	-1.32579	1100.97	0	1145.03	0	884.687	0	1100.97	#DIV/0!	0	0
Q91V64|ISOC1_MOUSE	Isochorismatase domain-containing protein 1 OS=Mus musculus OX=10090 GN=Isoc1 PE=1 SV=1	-2.48865	0.0472486	-1.32561	1642.77	7895.96	1721.58	7356.08	549.102	4995.28	-6253.19	4.8065	0.208051	-0.681829
P51410|RL9_MOUSE	60S ribosomal protein L9 OS=Mus musculus OX=10090 GN=Rpl9 PE=1 SV=2	2.48755	0.0473187	-1.32497	9962.96	2429.83	11133.8	1276.83	5374.54	2792.38	7533.13	0.243886	4.10027	0.612812
O88587|COMT_MOUSE	Catechol O-methyltransferase OS=Mus musculus OX=10090 GN=Comt PE=1 SV=2	2.48537	0.0474586	-1.32369	22092.7	5787.1	19599.2	4668.52	12808.8	2846.51	16305.6	0.261946	3.81758	0.581788
Q64521|GPDM_MOUSE	Glycerol-3-phosphate dehydrogenase, mitochondrial OS=Mus musculus OX=10090 GN=Gpd2 PE=1 SV=2"	2.48437	0.0475235	-1.32309	3063.94	1349.46	2988.19	1133.11	1195.26	690.161	1714.47	0.440435	2.27048	0.356118
Q62093|SRSF2_MOUSE	Serine_arginine-rich splicing factor 2 OS=Mus musculus OX=10090 GN=Srsf2 PE=1 SV=4	-2.47192	0.0483315	-1.31577	1348.49	4601.37	938.068	4015.73	857.897	2488.12	-3252.88	3.41224	0.293063	-0.53304
Q9DCN1|NUD12_MOUSE	NAD-capped RNA hydrolase NUDT12 OS=Mus musculus OX=10090 GN=Nudt12 PE=1 SV=1	-2.47123	0.0483772	-1.31536	4265.11	38155.8	5173.06	39008.7	1982.55	27356.5	-33890.7	8.94604	0.111781	-0.951631
Q8C7E7|STBD1_MOUSE	Starch-binding domain-containing protein 1 OS=Mus musculus OX=10090 GN=Stbd1 PE=1 SV=1	-2.46756	0.0486181	-1.3132	2982.31	36367.8	2874.27	37599.8	758.324	27048.9	-33385.5	12.1945	0.082004	-1.08617
P05064|ALDOA_MOUSE	Fructose-bisphosphate aldolase A OS=Mus musculus OX=10090 GN=Aldoa PE=1 SV=2	2.46752	0.0486207	-1.31318	15940	1745.75	15693.5	1653.59	11498.3	387.828	14194.3	0.10952	9.13078	0.960508
Q9DBL1|ACDSB_MOUSE	Short_branched chain specific acyl-CoA dehydrogenase, mitochondrial OS=Mus musculus OX=10090 GN=Acadsb PE=1 SV=1"	2.45268	0.0496097	-1.30443	7924.2	3523.48	8608.18	2793.16	2653.05	2416.31	4400.71	0.444649	2.24897	0.351983
P53994|RAB2A_MOUSE	Ras-related protein Rab-2A OS=Mus musculus OX=10090 GN=Rab2a PE=1 SV=1	2.44672	0.0500132	-1.30092	6496.7	1612.47	6865.2	1679.44	3784.1	1272.98	4884.23	0.248198	4.02904	0.605201
P61922|GABT_MOUSE	4-aminobutyrate aminotransferase, mitochondrial OS=Mus musculus OX=10090 GN=Abat PE=1 SV=1"	2.4438	0.0502118	-1.29919	5887.44	792.456	5886.74	533.147	4069.19	910.086	5094.98	0.134601	7.42935	0.870951
P16546|SPTN1_MOUSE	Spectrin alpha chain, non-erythrocytic 1 OS=Mus musculus OX=10090 GN=Sptan1 PE=1 SV=4"	2.43569	0.0507685	-1.29441	4091.43	1261.44	4047.84	1194.72	2293.89	371.498	2829.99	0.308313	3.24346	0.511008
Q64727|VINC_MOUSE	Vinculin OS=Mus musculus OX=10090 GN=Vcl PE=1 SV=4	-2.43553	0.0507793	-1.29431	438.889	2941.02	503.146	3559.2	333.47	2027.45	-2502.13	6.70105	0.14923	-0.826143
Q9CQC9|SAR1B_MOUSE	GTP-binding protein SAR1b OS=Mus musculus OX=10090 GN=Sar1b PE=1 SV=1	-2.42975	0.0511795	-1.2909	1765.01	10857.6	1687.78	9900.77	985.756	7419.13	-9092.55	6.15156	0.16256	-0.788985
Q9CPQ8|ATP5L_MOUSE	ATP synthase subunit g, mitochondrial OS=Mus musculus OX=10090 GN=Atp5mg PE=1 SV=1"	2.42602	0.0514399	-1.2887	8730.93	3486.22	8982.13	3329.43	4301.53	437.432	5244.71	0.399295	2.50441	0.398706
Q9QXT0|CNPY2_MOUSE	Protein canopy homolog 2 OS=Mus musculus OX=10090 GN=Cnpy2 PE=1 SV=1	2.41987	0.0518725	-1.28506	4095.88	685.619	4430.52	678.886	2785.33	431.435	3410.26	0.167393	5.97398	0.776264
P17427|AP2A2_MOUSE	AP-2 complex subunit alpha-2 OS=Mus musculus OX=10090 GN=Ap2a2 PE=1 SV=2	2.40912	0.0526367	-1.27871	14454.7	4364.2	15595.2	4775.5	8050.66	2315.08	10090.5	0.301922	3.31211	0.520105
P24457|CP2DB_MOUSE	Cytochrome P450 2D11 OS=Mus musculus OX=10090 GN=Cyp2d11 PE=2 SV=2	2.40495	0.0529363	-1.27625	890.797	63.5404	981.08	0	676.121	127.081	827.256	0.0713299	14.0194	1.14673
Q3UQ44|IQGA2_MOUSE	Ras GTPase-activating-like protein IQGAP2 OS=Mus musculus OX=10090 GN=Iqgap2 PE=1 SV=2	2.40042	0.0532642	-1.27356	4373.12	541.698	4450.58	621.043	3184.35	224.928	3831.42	0.12387	8.07298	0.907034
O88822|SC5D_MOUSE	Lathosterol oxidase OS=Mus musculus OX=10090 GN=Sc5d PE=2 SV=2	2.39466	0.0536843	-1.27015	4044.84	750.496	4669.46	737.618	2666.7	677.491	3294.34	0.185544	5.38955	0.731553
Q7TMB8|CYFP1_MOUSE	Cytoplasmic FMR1-interacting protein 1 OS=Mus musculus OX=10090 GN=Cyfip1 PE=1 SV=1	2.38257	0.0545765	-1.26299	2034.32	403.691	1558.43	335.879	1306.63	407.814	1630.63	0.198441	5.03929	0.70237
Q9WVJ3|CBPQ_MOUSE	Carboxypeptidase Q OS=Mus musculus OX=10090 GN=Cpq PE=1 SV=1	-2.37807	0.0549129	-1.26033	1928.78	4230.97	1409.31	4691.57	1197.29	1521.61	-2302.18	2.19359	0.455873	-0.341156
P07309|TTHY_MOUSE	Transthyretin OS=Mus musculus OX=10090 GN=Ttr PE=1 SV=1	2.3715	0.0554069	-1.25644	5665.4	773.398	6477.56	919.554	4087.91	556.819	4892.01	0.136512	7.32534	0.864828
Q8JZN5|ACAD9_MOUSE	Complex I assembly factor ACAD9, mitochondrial OS=Mus musculus OX=10090 GN=Acad9 PE=1 SV=2"	2.36316	0.0560419	-1.25149	5874.72	3151.33	6434.76	2952.99	1967.58	1200.45	2723.39	0.536422	1.8642	0.270494
P58735|S26A1_MOUSE	Sulfate anion transporter 1 OS=Mus musculus OX=10090 GN=Slc26a1 PE=1 SV=1	2.36239	0.0561009	-1.25103	16410.2	1371.5	17482.7	1281.26	12668.3	1269.52	15038.7	0.0835764	11.9651	1.07792
Q9DCX8|IYD1_MOUSE	Iodotyrosine deiodinase 1 OS=Mus musculus OX=10090 GN=Iyd PE=1 SV=1	2.35958	0.0563161	-1.24937	13409.8	2211.33	16392.2	1244.3	9144.72	2543.74	11198.5	0.164904	6.06414	0.782769
Q9Z211|PX11A_MOUSE	Peroxisomal membrane protein 11A OS=Mus musculus OX=10090 GN=Pex11a PE=1 SV=1	-2.35175	0.0569218	-1.24472	4776.62	16976.7	4423.35	17388.4	2972.25	9940.46	-12200.1	3.55413	0.281363	-0.550733
Q01279|EGFR_MOUSE	Epidermal growth factor receptor OS=Mus musculus OX=10090 GN=Egfr PE=1 SV=1	2.33216	0.0584676	-1.23309	13362.6	2144.32	11504	2234.03	9585.53	819.265	11218.3	0.160472	6.23161	0.7946
O54749|CP2J5_MOUSE	Cytochrome P450 2J5 OS=Mus musculus OX=10090 GN=Cyp2j5 PE=1 SV=1	2.3161	0.0597669	-1.22354	3320.09	636.404	4322.87	644.184	2221.59	659.524	2683.69	0.191683	5.21696	0.717417
O70325|GPX4_MOUSE	Phospholipid hydroperoxide glutathione peroxidase OS=Mus musculus OX=10090 GN=Gpx4 PE=1 SV=4	-2.31523	0.0598384	-1.22302	2144.61	4795.09	1453.36	5267.78	1929.6	1232.45	-2650.48	2.23588	0.447251	-0.349448
Q3THE2|ML12B_MOUSE	Myosin regulatory light chain 12B OS=Mus musculus OX=10090 GN=Myl12b PE=1 SV=2	2.30774	0.0604557	-1.21856	4246.75	1126.9	4500.86	1063.62	2632.23	618.056	3119.85	0.265356	3.76853	0.576172
Q8C767|PPR3B_MOUSE	Protein phosphatase 1 regulatory subunit 3B OS=Mus musculus OX=10090 GN=Ppp1r3b PE=1 SV=1	-2.30579	0.0606179	-1.2174	1536.96	22567.4	1544.49	22790	973.023	18215.5	-21030.5	14.6831	0.0681054	-1.16682
Q8CGK3|LONM_MOUSE	Lon protease homolog, mitochondrial OS=Mus musculus OX=10090 GN=Lonp1 PE=1 SV=2"	2.29897	0.0611869	-1.21334	6383.14	1958.36	5745.84	2109.8	3655.28	1206.86	4424.78	0.306802	3.25943	0.513142
Q91XD4|FTCD_MOUSE	Formimidoyltransferase-cyclodeaminase OS=Mus musculus OX=10090 GN=Ftcd PE=1 SV=1	2.29581	0.0614525	-1.21146	7382.12	2260.34	8027.32	2105.44	3997.56	1981.82	5121.78	0.306191	3.26593	0.514007
Q64FW2|RETST_MOUSE	All-trans-retinol 13,14-reductase OS=Mus musculus OX=10090 GN=Retsat PE=1 SV=3"	2.2951	0.0615124	-1.21104	3124.45	546.233	3196.48	558.7	2218.97	351.981	2578.22	0.174825	5.72	0.757396
Q6ZWV7|RL35_MOUSE	60S ribosomal protein L35 OS=Mus musculus OX=10090 GN=Rpl35 PE=1 SV=1	2.28625	0.0622632	-1.20577	10548	2541.7	11797.4	1910.22	6789.1	1721.2	8006.33	0.240965	4.14999	0.618047
Q3ULD5|MCCB_MOUSE	Methylcrotonoyl-CoA carboxylase beta chain, mitochondrial OS=Mus musculus OX=10090 GN=Mccc2 PE=1 SV=1"	2.28294	0.0625466	-1.2038	2409.85	1409.98	2536.15	1575.66	598.035	640.028	999.868	0.585091	1.70913	0.232776
Q8CI51|PDLI5_MOUSE	PDZ and LIM domain protein 5 OS=Mus musculus OX=10090 GN=Pdlim5 PE=1 SV=4	-2.27807	0.0629662	-1.20089	637.168	1283.93	645.237	1375.97	522.581	222.098	-646.766	2.01506	0.496262	-0.304289
P57776|EF1D_MOUSE	Elongation factor 1-delta OS=Mus musculus OX=10090 GN=Eef1d PE=1 SV=3	2.27159	0.0635285	-1.19703	1321.2	351.518	1145.06	341.348	793.891	314.029	969.678	0.26606	3.75854	0.57502
Q9CZS1|AL1B1_MOUSE	Aldehyde dehydrogenase X, mitochondrial OS=Mus musculus OX=10090 GN=Aldh1b1 PE=1 SV=1"	2.27103	0.0635781	-1.19669	12274.3	6372.69	12181	6544.02	3814.53	3530.07	5901.61	0.51919	1.92608	0.284674
P41317|MBL2_MOUSE	Mannose-binding protein C OS=Mus musculus OX=10090 GN=Mbl2 PE=1 SV=2	2.25951	0.0645918	-1.18982	2647.63	582.505	3233.44	259.554	1628.96	829.387	2065.13	0.22001	4.54525	0.657558
Q9DC16|ERGI1_MOUSE	Endoplasmic reticulum-Golgi intermediate compartment protein 1 OS=Mus musculus OX=10090 GN=Ergic1 PE=1 SV=1	2.25938	0.0646033	-1.18975	2909.84	1431.9	2981.94	1278.57	667.571	1125.13	1477.94	0.492089	2.03215	0.307956
Q91WN4|KMO_MOUSE	Kynurenine 3-monooxygenase OS=Mus musculus OX=10090 GN=Kmo PE=1 SV=1	2.25439	0.0650474	-1.18677	27393.3	14588.7	25751.7	14488.7	9528.08	6185.37	12804.6	0.532563	1.87771	0.273629
P11438|LAMP1_MOUSE	Lysosome-associated membrane glycoprotein 1 OS=Mus musculus OX=10090 GN=Lamp1 PE=1 SV=2	2.24556	0.0658421	-1.1815	3928.31	446.889	2974.35	246.071	3046.39	577.874	3481.42	0.113761	8.79035	0.944006
Q8BH95|ECHM_MOUSE	Enoyl-CoA hydratase, mitochondrial OS=Mus musculus OX=10090 GN=Echs1 PE=1 SV=1"	2.23799	0.0665306	-1.17698	20859.5	6741	19973.7	4461.55	10732.8	6633.13	14118.5	0.323162	3.09442	0.49058
Q9D1G1|RAB1B_MOUSE	Ras-related protein Rab-1B OS=Mus musculus OX=10090 GN=Rab1b PE=1 SV=1	2.23236	0.0670477	-1.17362	5253.7	2145.84	4383.91	2101.55	2688.72	723.545	3107.86	0.408443	2.44832	0.388868
Q07417|ACADS_MOUSE	Short-chain specific acyl-CoA dehydrogenase, mitochondrial OS=Mus musculus OX=10090 GN=Acads PE=1 SV=2"	2.23151	0.0671261	-1.17311	10840.9	3853.08	11097.3	4306.22	6147.52	1196.21	6987.79	0.355422	2.81356	0.449256
Q99K67|AASS_MOUSE	Alpha-aminoadipic semialdehyde synthase, mitochondrial OS=Mus musculus OX=10090 GN=Aass PE=1 SV=1"	2.23063	0.0672079	-1.17258	13928.1	4186.82	12999.1	4483.6	8662.87	1113.34	9741.28	0.300602	3.32666	0.522008
P06909|CFAH_MOUSE	Complement factor H OS=Mus musculus OX=10090 GN=Cfh PE=1 SV=2	2.2214	0.0680662	-1.16707	1864.61	289.684	1675.23	339.193	1403.07	204.903	1574.93	0.155359	6.4367	0.808664
O09167|RL21_MOUSE	60S ribosomal protein L21 OS=Mus musculus OX=10090 GN=Rpl21 PE=1 SV=3	2.21812	0.0683744	-1.16511	12160.8	3422.12	15141.8	3000.68	7645.02	1907.24	8738.66	0.281406	3.55358	0.550666
Q8BFR5|EFTU_MOUSE	Elongation factor Tu, mitochondrial OS=Mus musculus OX=10090 GN=Tufm PE=1 SV=1"	2.21601	0.0685737	-1.16384	19639	6070.84	21501.2	5977.04	12176.6	1298.14	13568.2	0.309122	3.23497	0.509871
P63260|ACTG_MOUSE	Actin, cytoplasmic 2 OS=Mus musculus OX=10090 GN=Actg1 PE=1 SV=1"	2.20916	0.0692237	-1.15975	2469.64	552.899	2715.7	444.791	1603.87	662.392	1916.74	0.223878	4.46671	0.649988
Q9DBH5|LMAN2_MOUSE	Vesicular integral-membrane protein VIP36 OS=Mus musculus OX=10090 GN=Lman2 PE=1 SV=2	2.20727	0.0694036	-1.15862	2943.81	287.431	2879.32	313.712	2397.12	217.112	2656.38	0.097639	10.2418	1.01038
P20108|PRDX3_MOUSE	Thioredoxin-dependent peroxide reductase, mitochondrial OS=Mus musculus OX=10090 GN=Prdx3 PE=1 SV=1"	2.20172	0.0699361	-1.1553	29069.4	12829.7	31444.5	11156.3	13286.5	6409.75	16239.7	0.441347	2.26579	0.35522
P10852|4F2_MOUSE	4F2 cell-surface antigen heavy chain OS=Mus musculus OX=10090 GN=Slc3a2 PE=1 SV=1	2.19856	0.0702418	-1.1534	3107.94	848.642	3206.01	534.631	1934.3	694.663	2259.3	0.273056	3.66225	0.563748
P47934|CACP_MOUSE	Carnitine O-acetyltransferase OS=Mus musculus OX=10090 GN=Crat PE=1 SV=3	-2.19168	0.0709102	-1.14929	4600.77	13267.4	3277.78	12924.2	2989.07	7322.01	-8666.6	2.88373	0.346773	-0.459954
Q01853|TERA_MOUSE	Transitional endoplasmic reticulum ATPase OS=Mus musculus OX=10090 GN=Vcp PE=1 SV=4	2.19051	0.0710247	-1.14859	6957.84	649.071	6691.17	642.55	5752.92	287.253	6308.77	0.0932862	10.7197	1.03018
P12790|CP2B9_MOUSE	Cytochrome P450 2B9 OS=Mus musculus OX=10090 GN=Cyp2b9 PE=1 SV=2	2.17904	0.0721568	-1.14172	16976.3	4351.75	19095.8	3405.3	10986.7	3681.93	12624.5	0.256343	3.90102	0.591178
Q9CRD2|EMC2_MOUSE	ER membrane protein complex subunit 2 OS=Mus musculus OX=10090 GN=Emc2 PE=1 SV=1	2.17109	0.0729526	-1.13696	4144.82	869.481	4101.79	963.132	2948.01	642.635	3275.34	0.209775	4.76701	0.678246
P98192|GNPAT_MOUSE	Dihydroxyacetone phosphate acyltransferase OS=Mus musculus OX=10090 GN=Gnpat PE=1 SV=1	-2.1483	0.0752829	-1.1233	905.166	4249.34	969.937	4304.68	382.433	3089.75	-3344.17	4.69454	0.213013	-0.671593
Q91ZV0|MIA2_MOUSE	Melanoma inhibitory activity protein 2 OS=Mus musculus OX=10090 GN=Mia2 PE=1 SV=3	2.14288	0.0758477	-1.12006	1669.78	817.581	1407.43	801.387	735.195	303.487	852.195	0.489635	2.04234	0.310127
Q99JB2|STML2_MOUSE	Stomatin-like protein 2, mitochondrial OS=Mus musculus OX=10090 GN=Stoml2 PE=1 SV=1"	2.14264	0.0758736	-1.11991	849.722	170.514	673.24	0	534.46	341.027	679.208	0.20067	4.98331	0.697518
Q9CZW5|TOM70_MOUSE	Mitochondrial import receptor subunit TOM70 OS=Mus musculus OX=10090 GN=Tomm70 PE=1 SV=2	2.14138	0.0760058	-1.11915	11555.5	2446.27	11270.2	2157.49	8320.23	1776.78	9109.24	0.211697	4.72373	0.674285
Q8R0F8|FAHD1_MOUSE	Acylpyruvase FAHD1, mitochondrial OS=Mus musculus OX=10090 GN=Fahd1 PE=1 SV=2"	2.14078	0.0760685	-1.1188	2929.88	904.858	2356.55	881.182	1878.56	223.892	2025.02	0.308838	3.23794	0.510269
Q5FW57|GLYAL_MOUSE	Glycine N-acyltransferase-like protein OS=Mus musculus OX=10090 GN=Gm4952 PE=1 SV=3	2.13847	0.0763112	-1.11741	4776.68	1415.09	3841.5	1332.21	3112.19	445.564	3361.59	0.29625	3.37553	0.528342
Q99LX0|PARK7_MOUSE	Parkinson disease protein 7 homolog OS=Mus musculus OX=10090 GN=Park7 PE=1 SV=1	2.13642	0.076528	-1.11618	1801.78	429.32	1338.6	478.69	1253.29	282.884	1372.46	0.238276	4.19682	0.62292
Q6NXH9|K2C73_MOUSE	Keratin, type II cytoskeletal 73 OS=Mus musculus OX=10090 GN=Krt73 PE=1 SV=1"	-2.13278	0.0769138	-1.114	870.484	8573.37	894.287	7093.2	345.974	7215.05	-7702.88	9.84897	0.101534	-0.993391
Q9CQ92|FIS1_MOUSE	Mitochondrial fission 1 protein OS=Mus musculus OX=10090 GN=Fis1 PE=1 SV=1	-2.10772	0.0796229	-1.09896	2672.98	9087.11	2615.4	7497.19	1670.11	5852.68	-6414.13	3.39961	0.294151	-0.53143
P85094|ISC2A_MOUSE	Isochorismatase domain-containing protein 2A OS=Mus musculus OX=10090 GN=Isoc2a PE=1 SV=1	2.10729	0.0796705	-1.0987	6751.04	1357.35	4904.02	1409.18	5097.3	471.678	5393.69	0.201057	4.9737	0.69668
Q925N2|SFXN2_MOUSE	Sideroflexin-2 OS=Mus musculus OX=10090 GN=Sfxn2 PE=1 SV=1	2.10672	0.079733	-1.09836	3967.38	2271.36	4246.49	2254.28	1387.5	816.878	1696.03	0.572507	1.7467	0.242219
P48410|ABCD1_MOUSE	ATP-binding cassette sub-family D member 1 OS=Mus musculus OX=10090 GN=Abcd1 PE=1 SV=1	-2.1047	0.0799565	-1.09715	1004.25	4433.29	886.214	4280.92	565.724	3208.97	-3429.03	4.41451	0.226526	-0.644883
Q571E4|GALNS_MOUSE	N-acetylgalactosamine-6-sulfatase OS=Mus musculus OX=10090 GN=Galns PE=1 SV=2	-2.0999	0.0804888	-1.09426	1862.61	6331.32	1764.57	7650.15	1131.84	4102.86	-4468.71	3.39917	0.29419	-0.531372
P56404|AQP8_MOUSE	Aquaporin-8 OS=Mus musculus OX=10090 GN=Aqp8 PE=2 SV=1	2.09043	0.0815499	-1.08858	2891.46	886.266	2872.28	1003.33	1893.68	307.249	2005.19	0.306512	3.26251	0.513552
P00687|AMY1_MOUSE	Alpha-amylase 1 OS=Mus musculus OX=10090 GN=Amy1 PE=1 SV=2	-2.07656	0.0831299	-1.08024	1144.09	3030.02	1019.04	3457.59	571.892	1724.03	-1885.93	2.64841	0.377585	-0.422985
P60766|CDC42_MOUSE	Cell division control protein 42 homolog OS=Mus musculus OX=10090 GN=Cdc42 PE=1 SV=2	2.0733	0.0835055	-1.07829	5792.78	1588.46	5791.81	1743.37	3992.23	714.663	4204.33	0.274213	3.6468	0.561912
Q8CG76|ARK72_MOUSE	Aflatoxin B1 aldehyde reductase member 2 OS=Mus musculus OX=10090 GN=Akr7a2 PE=1 SV=3	2.07303	0.0835359	-1.07813	807.318	280.205	876.392	299.607	460.994	214.71	527.113	0.347081	2.88117	0.459569
Q6PA06|ATLA2_MOUSE	Atlastin-2 OS=Mus musculus OX=10090 GN=Atl2 PE=1 SV=1	2.07282	0.0835608	-1.078	3267.78	706.493	3858.1	634.037	2376.72	677.154	2561.28	0.2162	4.62535	0.665144
Q80Z19|MUC2_MOUSE	Mucin-2 (Fragments) OS=Mus musculus OX=10090 GN=Muc2 PE=1 SV=2	2.0648	0.0844937	-1.07318	6491.88	1078.51	6041.25	1168.73	5221.63	478.289	5413.36	0.166132	6.01929	0.779545
O08966|S22A1_MOUSE	Solute carrier family 22 member 1 OS=Mus musculus OX=10090 GN=Slc22a1 PE=1 SV=2	2.06403	0.0845838	-1.07271	3053.43	364.511	3353.15	372.042	2589.14	291.655	2688.92	0.119377	8.37679	0.923078
P04919|B3AT_MOUSE	Band 3 anion transport protein OS=Mus musculus OX=10090 GN=Slc4a1 PE=1 SV=1	2.06037	0.0850124	-1.07052	17469.2	1426.76	11880	1286.41	15563.8	515.511	16042.4	0.0816731	12.2439	1.08792
Q9D7B6|ACAD8_MOUSE	Isobutyryl-CoA dehydrogenase, mitochondrial OS=Mus musculus OX=10090 GN=Acad8 PE=1 SV=2"	2.05411	0.0857522	-1.06675	4330.58	1942.42	4821.31	1949.72	2310.05	265.458	2388.16	0.448535	2.22948	0.348204
Q9D1N9|RM21_MOUSE	39S ribosomal protein L21, mitochondrial OS=Mus musculus OX=10090 GN=Mrpl21 PE=1 SV=1"	2.05069	0.0861596	-1.0647	1768.03	250.742	1308.41	272.61	1462.29	226.86	1517.29	0.14182	7.0512	0.848263
O70579|PM34_MOUSE	Peroxisomal membrane protein PMP34 OS=Mus musculus OX=10090 GN=Slc25a17 PE=1 SV=1	-2.04876	0.0863901	-1.06354	337.785	1200.68	337.56	1441.14	121.861	833.493	-862.891	3.55456	0.281329	-0.550786
O88986|KBL_MOUSE	2-amino-3-ketobutyrate coenzyme A ligase, mitochondrial OS=Mus musculus OX=10090 GN=Gcat PE=1 SV=2"	2.04437	0.0869165	-1.0609	2567.8	558.31	2298.96	446.542	1878.93	578.141	2009.48	0.217428	4.59923	0.662685
Q6TCG2|PAQR9_MOUSE	Membrane progesterone receptor epsilon OS=Mus musculus OX=10090 GN=Paqr9 PE=1 SV=2	2.04228	0.0871692	-1.05964	2399.99	190.876	1978.58	173.665	2151.95	222.19	2209.12	0.079532	12.5736	1.09946
P17742|PPIA_MOUSE	Peptidyl-prolyl cis-trans isomerase A OS=Mus musculus OX=10090 GN=Ppia PE=1 SV=2	2.04094	0.0873301	-1.05884	26385.1	12916.2	27994.1	8381.34	6320.37	11587	13468.9	0.489527	2.04279	0.310223
Q9CRB9|MIC19_MOUSE	MICOS complex subunit Mic19 OS=Mus musculus OX=10090 GN=Chchd3 PE=1 SV=1	2.03442	0.088123	-1.05491	2604.9	1066.58	2651.09	938.475	1351.32	678.956	1538.32	0.40945	2.4423	0.387799
Q64339|ISG15_MOUSE	Ubiquitin-like protein ISG15 OS=Mus musculus OX=10090 GN=Isg15 PE=1 SV=4	-2.03235	0.0883762	-1.05366	2337.93	7681.1	2316.29	8153.2	1972.69	4874.06	-5343.17	3.28543	0.304374	-0.516592
Q9JKJ9|CP39A_MOUSE	24-hydroxycholesterol 7-alpha-hydroxylase OS=Mus musculus OX=10090 GN=Cyp39a1 PE=1 SV=1	2.03158	0.0884696	-1.05321	23062.5	1730.61	24026.1	1629.46	20965.8	1203.83	21331.9	0.0750397	13.3263	1.12471
P16460|ASSY_MOUSE	Argininosuccinate synthase OS=Mus musculus OX=10090 GN=Ass1 PE=1 SV=1	2.02864	0.0888307	-1.05144	866840	372565	996270	288320	427083	234645	494275	0.429797	2.32668	0.366737
P35576|G6PC1_MOUSE	Glucose-6-phosphatase catalytic subunit 1 OS=Mus musculus OX=10090 GN=G6pc1 PE=1 SV=2	2.02674	0.0890656	-1.05029	1576.81	106.964	1539.53	99.2405	1445.13	124.154	1469.85	0.0678357	14.7415	1.16854
Q9CR67|TMM33_MOUSE	Transmembrane protein 33 OS=Mus musculus OX=10090 GN=Tmem33 PE=1 SV=1	2.02397	0.0894077	-1.04863	5776.12	1490.31	5161.09	1428.77	3973.84	1464.36	4285.82	0.258012	3.87579	0.58836
Q9D7N9|APMAP_MOUSE	Adipocyte plasma membrane-associated protein OS=Mus musculus OX=10090 GN=Apmap PE=1 SV=1	2.02367	0.0894449	-1.04844	9338.4	2290.47	8693.66	2469.87	6851.31	1256.13	7047.93	0.245274	4.07707	0.610348
O55142|RL35A_MOUSE	60S ribosomal protein L35a OS=Mus musculus OX=10090 GN=Rpl35a PE=1 SV=2	2.02005	0.0898938	-1.04627	12768.2	5172.62	12683.1	2312.16	4168.81	6258.96	7595.61	0.405116	2.46843	0.39242
Q99MD6|TRXR3_MOUSE	Thioredoxin reductase 3 OS=Mus musculus OX=10090 GN=Txnrd3 PE=1 SV=3	-2.01894	0.0900323	-1.0456	805.83	2297.7	778.556	2555.38	367.899	1431.35	-1491.87	2.85135	0.350712	-0.45505
O09173|HGD_MOUSE	Homogentisate 1,2-dioxygenase OS=Mus musculus OX=10090 GN=Hgd PE=1 SV=2"	2.00957	0.0912085	-1.03996	12427	5214.64	10358.8	4207.72	5891.37	4100.62	7212.33	0.419623	2.38309	0.377141
Q9WUB3|PYGM_MOUSE	Glycogen phosphorylase, muscle form OS=Mus musculus OX=10090 GN=Pygm PE=1 SV=3"	-2.00611	0.0916475	-1.03788	3741.32	35373.7	3335.37	36118.6	964.183	31521.3	-31632.4	9.45487	0.105766	-0.975655
P27808|MGAT1_MOUSE	Alpha-1,3-mannosyl-glycoprotein 2-beta-N-acetylglucosaminyltransferase OS=Mus musculus OX=10090 GN=Mgat1 PE=1 SV=1"	2.00405	0.091909	-1.03664	3462.28	472.946	2356.36	434.353	2981.37	106.942	2989.33	0.1366	7.32067	0.864551
Q9DBL7|COASY_MOUSE	Bifunctional coenzyme A synthase OS=Mus musculus OX=10090 GN=Coasy PE=1 SV=2	2.00387	0.0919314	-1.03654	2478.42	948.735	2600.58	1008.04	1431.8	529.934	1529.68	0.382799	2.61234	0.417029
P09405|NUCL_MOUSE	Nucleolin OS=Mus musculus OX=10090 GN=Ncl PE=1 SV=2	-1.99678	0.0928401	-1.03226	652.766	2143.6	536.364	2156.46	367.486	1447.31	-1490.83	3.28387	0.304519	-0.516386
Q9DCP2|S38A3_MOUSE	Sodium-coupled neutral amino acid transporter 3 OS=Mus musculus OX=10090 GN=Slc38a3 PE=1 SV=1	1.98949	0.0937825	-1.02788	8102.84	968.929	7308.4	968.948	7169.16	187.185	7133.91	0.119579	8.36267	0.922345
Q8BX90|FND3A_MOUSE	Fibronectin type-III domain-containing protein 3A OS=Mus musculus OX=10090 GN=Fndc3a PE=1 SV=3	1.9724	0.0960307	-1.01759	2015.98	661.666	1964.58	593.936	1292.47	464.097	1354.32	0.32821	3.04683	0.483848
P62821|RAB1A_MOUSE	Ras-related protein Rab-1A OS=Mus musculus OX=10090 GN=Rab1A PE=1 SV=3	1.96156	0.0974836	-1.01107	47471.4	22626	47802.1	21382	24518.4	6369.31	24845.4	0.476624	2.09809	0.321824
Q922Q1|MARC2_MOUSE	Mitochondrial amidoxime reducing component 2 OS=Mus musculus OX=10090 GN=Mtarc2 PE=1 SV=1	-1.96049	0.0976284	-1.01042	140328	225449	144301	214025	26086.9	82825.4	-85121.2	1.60659	0.622437	-0.205905
Q91XE0|GLYAT_MOUSE	Glycine N-acyltransferase OS=Mus musculus OX=10090 GN=Glyat PE=1 SV=1	1.94314	0.100005	-0.999976	7008.24	1323.31	4788.66	1325.23	5797.62	790.639	5684.93	0.188822	5.296	0.723948
Q61070|EI24_MOUSE	Etoposide-induced protein 2.4 OS=Mus musculus OX=10090 GN=Ei24 PE=1 SV=3	1.94129	0.100263	-0.99886	3941.05	808.142	3621.16	717.521	3182.19	539.864	3132.91	0.205058	4.87668	0.688124
Q03311|CHLE_MOUSE	Cholinesterase OS=Mus musculus OX=10090 GN=Bche PE=1 SV=2	1.94077	0.100335	-0.998546	5427.75	1067.28	4145.77	1051.04	4470.56	454.025	4360.47	0.196634	5.0856	0.706342
P61255|RL26_MOUSE	60S ribosomal protein L26 OS=Mus musculus OX=10090 GN=Rpl26 PE=1 SV=1	1.93309	0.101408	-0.993927	19962.6	7488.76	18462.9	6246.61	12536.7	3063.43	12473.8	0.37514	2.66567	0.425807
P62852|RS25_MOUSE	40S ribosomal protein S25 OS=Mus musculus OX=10090 GN=Rps25 PE=1 SV=1	1.92551	0.10248	-0.989361	16099.8	4208.59	15097.9	2181.62	11477	4564.24	11891.2	0.261406	3.82546	0.582684
P55264|ADK_MOUSE	Adenosine kinase OS=Mus musculus OX=10090 GN=Adk PE=1 SV=2	-1.92501	0.102551	-0.989062	969.553	11236.3	1000.93	11085.4	302.71	10662.4	-10266.8	11.5892	0.0862874	-1.06405
P29788|VTNC_MOUSE	Vitronectin OS=Mus musculus OX=10090 GN=Vtn PE=1 SV=2	-1.92029	0.103225	-0.986216	1888.31	4853.22	1661.71	3849.3	1221.25	2836.23	-2964.91	2.57014	0.389084	-0.409957
Q9CQJ8|NDUB9_MOUSE	NADH dehydrogenase [ubiquinone] 1 beta subcomplex subunit 9 OS=Mus musculus OX=10090 GN=Ndufb9 PE=1 SV=3	1.91981	0.103293	-0.98593	1401.68	253.225	1007.94	215.57	1158.51	298.794	1148.46	0.180658	5.53532	0.743143
Q9JHW2|NIT2_MOUSE	Omega-amidase NIT2 OS=Mus musculus OX=10090 GN=Nit2 PE=1 SV=1	1.9138	0.104158	-0.982309	724.359	390.457	614.704	362.798	313.247	153.742	333.903	0.539037	1.85516	0.268381
P28666|MUG2_MOUSE	Murinoglobulin-2 OS=Mus musculus OX=10090 GN=Mug2 PE=1 SV=2	1.90215	0.105854	-0.975293	2438.55	589.034	2095.31	534.931	1935.88	184.602	1849.52	0.241551	4.13991	0.616991
P62492|RB11A_MOUSE	Ras-related protein Rab-11A OS=Mus musculus OX=10090 GN=Rab11a PE=1 SV=3	1.87474	0.109954	-0.95879	11948.8	5080.69	11862.1	4487.61	6694.92	2977	6868.09	0.425206	2.3518	0.371401
P48771|CX7A2_MOUSE	Cytochrome c oxidase subunit 7A2, mitochondrial OS=Mus musculus OX=10090 GN=Cox7a2 PE=1 SV=2"	1.87144	0.110458	-0.956802	1785.42	564.421	1865.35	632.429	1237.29	414.529	1221	0.316127	3.16328	0.500138
Q9JMH9|MY18A_MOUSE	Unconventional myosin-XVIIIa OS=Mus musculus OX=10090 GN=Myo18a PE=1 SV=2	1.86792	0.110998	-0.954686	7424.17	2435.7	6192.99	2678.82	5260.35	925.739	4988.47	0.328078	3.04806	0.484023
Q9JM62|REEP6_MOUSE	Receptor expression-enhancing protein 6 OS=Mus musculus OX=10090 GN=Reep6 PE=1 SV=1	1.86643	0.111228	-0.953786	20299.7	6561.77	25222.2	5646.27	13501.6	5866.81	13738	0.323244	3.09364	0.49047
Q8VCG4|CO8G_MOUSE	Complement component C8 gamma chain OS=Mus musculus OX=10090 GN=C8g PE=1 SV=1	1.85994	0.112233	-0.949878	2943.53	1035.27	3113.47	943.976	1963.24	596.857	1908.26	0.35171	2.84325	0.453815
Q9R0P5|DEST_MOUSE	Destrin OS=Mus musculus OX=10090 GN=Dstn PE=1 SV=3	1.85993	0.112235	-0.94987	3512.51	859.185	3325.99	204.691	2498.02	1378.53	2653.32	0.244607	4.08818	0.61153
Q60598|SRC8_MOUSE	Src substrate cortactin OS=Mus musculus OX=10090 GN=Cttn PE=1 SV=2	1.85423	0.113125	-0.946441	3761.96	1219.4	4109.8	651.822	2226.73	1600.82	2542.55	0.324141	3.08508	0.489266
Q9CXV1|DHSD_MOUSE	Succinate dehydrogenase [ubiquinone] cytochrome b small subunit, mitochondrial OS=Mus musculus OX=10090 GN=Sdhd PE=1 SV=2"	1.85315	0.113294	-0.945794	766.996	300.932	683.813	334.524	440.4	243.007	466.064	0.392351	2.54874	0.406325
Q9CPY7|AMPL_MOUSE	Cytosol aminopeptidase OS=Mus musculus OX=10090 GN=Lap3 PE=1 SV=3	1.84127	0.115175	-0.938642	8266.64	4946.81	8377.94	3857.92	1396.9	3324.47	3319.84	0.598406	1.67111	0.223004
Q9DBG7|SRPRA_MOUSE	Signal recognition particle receptor subunit alpha OS=Mus musculus OX=10090 GN=Srpra PE=1 SV=1	1.84062	0.11528	-0.938247	3832.24	1228.28	3888.57	1123.69	2797.32	425.143	2603.96	0.320511	3.12001	0.494156
P62892|RL39_MOUSE	60S ribosomal protein L39 OS=Mus musculus OX=10090 GN=Rpl39 PE=1 SV=2	1.83874	0.11558	-0.937118	5088.09	924.524	3134.43	869.277	4486.34	618.109	4163.57	0.181703	5.50347	0.740637
Q9WV54|ASAH1_MOUSE	Acid ceramidase OS=Mus musculus OX=10090 GN=Asah1 PE=1 SV=1	1.83555	0.116092	-0.935198	1801.75	434.014	1434.31	493.103	1447.1	356.118	1367.74	0.240885	4.15136	0.618191
Q3UMF0|COBL1_MOUSE	Cordon-bleu protein-like 1 OS=Mus musculus OX=10090 GN=Cobll1 PE=1 SV=2	1.83241	0.116598	-0.933307	4039.27	1592.69	3550.31	1585.96	2668.59	96.7434	2446.58	0.394301	2.53613	0.404172
P11609|CD1D1_MOUSE	Antigen-presenting glycoprotein CD1d1 OS=Mus musculus OX=10090 GN=Cd1d1 PE=1 SV=3	1.81868	0.118838	-0.925046	3279.11	1142.49	2415.82	1099.7	2293.07	512.474	2136.62	0.348414	2.87015	0.457904
Q8VCF0|MAVS_MOUSE	Mitochondrial antiviral-signaling protein OS=Mus musculus OX=10090 GN=Mavs PE=1 SV=1	-1.81406	0.1196	-0.92227	2134.84	3208.96	2345.61	3142.64	1121.51	380.258	-1074.13	1.50314	0.665273	-0.177
P51150|RAB7A_MOUSE	Ras-related protein Rab-7a OS=Mus musculus OX=10090 GN=Rab7a PE=1 SV=2	1.81055	0.120184	-0.920154	17758.7	7647.73	18349.7	7283.47	9844.18	5276.15	10111	0.430647	2.32209	0.365878
Q9JI39|ABCBA_MOUSE	ATP-binding cassette sub-family B member 10, mitochondrial OS=Mus musculus OX=10090 GN=Abcb10 PE=1 SV=1"	1.80232	0.121562	-0.915203	393.436	76.5075	427.49	0	316.658	153.015	316.929	0.19446	5.14245	0.71117
P62874|GBB1_MOUSE	Guanine nucleotide-binding protein G(I)_G(S)_G(T) subunit beta-1 OS=Mus musculus OX=10090 GN=Gnb1 PE=1 SV=3	1.79545	0.122723	-0.911076	2622.56	271.348	1719.74	218.245	2598.82	325.104	2351.21	0.103467	9.66494	0.985199
P48758|CBR1_MOUSE	Carbonyl reductase [NADPH] 1 OS=Mus musculus OX=10090 GN=Cbr1 PE=1 SV=3	1.79267	0.123197	-0.909401	4552.01	2096.28	5356.32	1567.57	2015.54	1855.76	2455.74	0.460516	2.17148	0.336755
O88983|STX8_MOUSE	Syntaxin-8 OS=Mus musculus OX=10090 GN=Stx8 PE=1 SV=1	1.79189	0.12333	-0.908933	1165.47	334.072	1340.72	283.425	839.915	394.519	831.398	0.286641	3.48868	0.542661
P53798|FDFT_MOUSE	Squalene synthase OS=Mus musculus OX=10090 GN=Fdft1 PE=1 SV=2	1.78711	0.124148	-0.906059	1213.76	62.7803	997.524	0	1281.96	125.561	1150.98	0.0517237	19.3335	1.28631
P55258|RAB8A_MOUSE	Ras-related protein Rab-8A OS=Mus musculus OX=10090 GN=Rab8a PE=1 SV=2	1.78474	0.124556	-0.904634	3831.2	696.986	3103.08	640.802	3483.12	451.255	3134.21	0.181924	5.4968	0.74011
Q9D0K1|PEX13_MOUSE	Peroxisomal membrane protein PEX13 OS=Mus musculus OX=10090 GN=Pex13 PE=1 SV=1	-1.78312	0.124837	-0.903657	371.389	1633.16	457.31	1614.87	259.592	1391.23	-1261.77	4.39743	0.227406	-0.643199
Q8BWP5|TTPA_MOUSE	Alpha-tocopherol transfer protein OS=Mus musculus OX=10090 GN=Ttpa PE=1 SV=1	-1.77283	0.126627	-0.897474	2684.92	7272.05	2770.39	6873.89	345.492	5163.38	-4587.13	2.70848	0.369211	-0.432726
P97425|ECP2_MOUSE	Eosinophil cationic protein 2 OS=Mus musculus OX=10090 GN=Ear2 PE=2 SV=1	-1.77105	0.126939	-0.896405	46.8146	1584.47	0	1071.88	93.6292	1733.91	-1537.66	33.8456	0.0295459	-1.5295
O70570|PIGR_MOUSE	Polymeric immunoglobulin receptor OS=Mus musculus OX=10090 GN=Pigr PE=1 SV=1	1.7707	0.127	-0.896195	1511.63	135.513	1514.02	0	1530.5	271.026	1376.11	0.089647	11.1549	1.04746
Q99M87|DNJA3_MOUSE	DnaJ homolog subfamily A member 3, mitochondrial OS=Mus musculus OX=10090 GN=Dnaja3 PE=1 SV=1"	1.76779	0.127513	-0.894446	1554.07	446.6	1103.59	531.885	1206.58	337.67	1107.47	0.287375	3.47978	0.541551
P36552|HEM6_MOUSE	Oxygen-dependent coproporphyrinogen-III oxidase, mitochondrial OS=Mus musculus OX=10090 GN=Cpox PE=1 SV=2"	1.75853	0.129157	-0.888882	4345.78	2294.76	3768.25	1691.25	1860.68	1406.81	2051.02	0.528044	1.89378	0.27733
Q9D6R2|IDH3A_MOUSE	Isocitrate dehydrogenase [NAD] subunit alpha, mitochondrial OS=Mus musculus OX=10090 GN=Idh3a PE=1 SV=1"	1.75685	0.129458	-0.887871	3484.1	492.711	2231.81	508.495	3399.67	197.42	2991.39	0.141417	7.07128	0.849498
Q9DBD0|ICA_MOUSE	Inhibitor of carbonic anhydrase OS=Mus musculus OX=10090 GN=Ica PE=1 SV=1	1.75624	0.129567	-0.887505	436.739	91.9269	414.288	67.9	376.01	113.167	344.812	0.210485	4.75094	0.67678
Q60648|SAP3_MOUSE	Ganglioside GM2 activator OS=Mus musculus OX=10090 GN=Gm2a PE=1 SV=2	1.75217	0.130299	-0.885059	557.822	0	379.745	0	636.722	0	557.822	#DIV/0!	0	0
Q61335|BAP31_MOUSE	B-cell receptor-associated protein 31 OS=Mus musculus OX=10090 GN=Bcap31 PE=1 SV=4	1.74166	0.132206	-0.87875	2609.85	801.257	1972.36	754.251	2073.46	118.781	1808.6	0.307012	3.2572	0.512844
P00688|AMYP_MOUSE	Pancreatic alpha-amylase OS=Mus musculus OX=10090 GN=Amy2 PE=1 SV=2	-1.72664	0.134981	-0.869727	11683.6	75276.7	5318.83	65813.4	13558.5	72402.7	-63593.1	6.44294	0.155209	-0.809084
Q921L3|TMCO1_MOUSE	Calcium load-activated calcium channel OS=Mus musculus OX=10090 GN=Tmco1 PE=1 SV=1	1.72493	0.1353	-0.868703	1754.87	174.747	1455.34	137.675	1819.95	210.666	1580.12	0.0995783	10.0423	1.00184
P84228|H32_MOUSE	Histone H3.2 OS=Mus musculus OX=10090 GN=H3c2 PE=1 SV=2	-1.70446	0.139179	-0.856426	7698.84	17467.4	7323.17	14326.2	2987.61	11066.1	-9768.56	2.26884	0.440755	-0.355803
O08914|FAAH1_MOUSE	Fatty-acid amide hydrolase 1 OS=Mus musculus OX=10090 GN=Faah PE=1 SV=1	1.70051	0.13994	-0.854058	3286.2	1003.92	2995.38	908.75	2416	1169.6	2282.28	0.305496	3.27336	0.514994
P48962|ADT1_MOUSE	ADP_ATP translocase 1 OS=Mus musculus OX=10090 GN=Slc25a4 PE=1 SV=4	1.69982	0.140074	-0.853643	1490.15	613.735	1478.63	523.883	987.416	297.234	876.415	0.411861	2.428	0.385249
Q8R0X7|SGPL1_MOUSE	Sphingosine-1-phosphate lyase 1 OS=Mus musculus OX=10090 GN=Sgpl1 PE=1 SV=1	1.69644	0.140729	-0.851616	849.179	384.145	754.438	434.996	464.087	291.885	465.033	0.452373	2.21057	0.344503
Q922U2|K2C5_MOUSE	Keratin, type II cytoskeletal 5 OS=Mus musculus OX=10090 GN=Krt5 PE=1 SV=1"	-1.69494	0.14102	-0.850718	20850.1	44679.9	18604.1	41178.6	10467	26098	-23829.8	2.14291	0.466655	-0.331004
O88531|PPT1_MOUSE	Palmitoyl-protein thioesterase 1 OS=Mus musculus OX=10090 GN=Ppt1 PE=1 SV=2	1.69425	0.141156	-0.850302	2814.92	1336.9	2829.74	1041.06	1608.35	676.3	1478.02	0.474933	2.10556	0.323368
P15116|CADH2_MOUSE	Cadherin-2 OS=Mus musculus OX=10090 GN=Cdh2 PE=1 SV=2	1.69154	0.141684	-0.84868	276.194	74.6008	353.536	0	185.881	149.202	201.593	0.270103	3.70229	0.568471
P26041|MOES_MOUSE	Moesin OS=Mus musculus OX=10090 GN=Msn PE=1 SV=3	1.68877	0.142227	-0.847018	2458.79	721.607	1619.04	875.015	1993.96	506.682	1737.18	0.293481	3.40737	0.53242
Q8JZS0|LIN7A_MOUSE	Protein lin-7 homolog A OS=Mus musculus OX=10090 GN=Lin7a PE=1 SV=2	1.68748	0.142481	-0.846243	4413.91	1926.03	4603.53	1863.03	2830.16	827.434	2487.88	0.436355	2.29171	0.36016
Q9CZX8|RS19_MOUSE	40S ribosomal protein S19 OS=Mus musculus OX=10090 GN=Rps19 PE=1 SV=3	1.68432	0.143104	-0.844349	1533.84	782.245	1653.52	571.079	685.277	571.733	751.592	0.509992	1.96081	0.292436
P0DN91|T254C_MOUSE	Transmembrane protein 254c OS=Mus musculus OX=10090 GN=Tmem254c PE=1 SV=1	1.68246	0.143471	-0.843237	2409.55	393.58	1631.18	427.675	2378.09	296.146	2015.97	0.163342	6.12214	0.786903
Q7TMF3|NDUAC_MOUSE	NADH dehydrogenase [ubiquinone] 1 alpha subcomplex subunit 12 OS=Mus musculus OX=10090 GN=Ndufa12 PE=1 SV=2	1.67972	0.144014	-0.841594	162.446	0	133.55	0	193.42	0	162.446	#DIV/0!	0	0
P46656|ADX_MOUSE	Adrenodoxin, mitochondrial OS=Mus musculus OX=10090 GN=Fdx1 PE=1 SV=1"	1.67629	0.144697	-0.83954	712.493	243.46	627.627	0	275.81	486.92	469.033	0.341701	2.92653	0.466353
Q8BVE3|VATH_MOUSE	V-type proton ATPase subunit H OS=Mus musculus OX=10090 GN=Atp6v1h PE=1 SV=1	1.66037	0.147907	-0.830013	129.492	0	102.298	0	155.979	0	129.492	#DIV/0!	0	0
Q9CQ22|LTOR1_MOUSE	Ragulator complex protein LAMTOR1 OS=Mus musculus OX=10090 GN=Lamtor1 PE=1 SV=1	1.65939	0.148107	-0.829424	496.213	0	391.248	0	598.066	0	496.213	#DIV/0!	0	0
Q8BFR4|GNS_MOUSE	N-acetylglucosamine-6-sulfatase OS=Mus musculus OX=10090 GN=Gns PE=1 SV=1	1.65678	0.148642	-0.827859	1818.4	1281.82	1963.17	1115.75	389.547	517.502	536.573	0.70492	1.4186	0.15186
Q61792|LASP1_MOUSE	LIM and SH3 domain protein 1 OS=Mus musculus OX=10090 GN=Lasp1 PE=1 SV=1	-1.65587	0.148827	-0.827317	1474.34	3759.11	1352.27	3434.1	1189	2490.32	-2284.77	2.5497	0.392204	-0.406488
P97449|AMPN_MOUSE	Aminopeptidase N OS=Mus musculus OX=10090 GN=Anpep PE=1 SV=4	1.65119	0.14979	-0.824517	4791.92	957.711	3471.74	815.922	4546.63	946.878	3834.21	0.19986	5.00351	0.699275
P16406|AMPE_MOUSE	Glutamyl aminopeptidase OS=Mus musculus OX=10090 GN=Enpep PE=1 SV=1	1.64491	0.15109	-0.820763	3926.32	1339.81	2971.21	1499.79	3125.93	344.419	2586.51	0.341239	2.9305	0.466941
Q61414|K1C15_MOUSE	Keratin, type I cytoskeletal 15 OS=Mus musculus OX=10090 GN=Krt15 PE=1 SV=2"	-1.63757	0.152626	-0.816372	5896.93	9004.15	6586.64	9527.16	2324.17	2999.94	-3107.22	1.52692	0.654913	-0.183816
Q9D6K5|SYJ2B_MOUSE	Synaptojanin-2-binding protein OS=Mus musculus OX=10090 GN=Synj2bp PE=1 SV=1	1.63333	0.153518	-0.813841	3440.46	2074.48	3657.94	2289.29	634.744	1547.5	1365.97	0.602967	1.65846	0.219706
Q8VCH8|UBXN4_MOUSE	UBX domain-containing protein 4 OS=Mus musculus OX=10090 GN=Ubxn4 PE=1 SV=1	1.63154	0.153898	-0.812768	522.381	249.624	455.091	261.388	271.637	194.955	272.757	0.477858	2.09267	0.320701
Q9EP75|CP4FE_MOUSE	Leukotriene-B4 omega-hydroxylase 3 OS=Mus musculus OX=10090 GN=Cyp4f14 PE=1 SV=1	1.62777	0.154698	-0.810514	9757.35	4693.05	11627.5	3042.89	3885.01	4860.54	5064.3	0.480976	2.07911	0.317877
Q9JHS4|CLPX_MOUSE	ATP-dependent Clp protease ATP-binding subunit clpX-like, mitochondrial OS=Mus musculus OX=10090 GN=Clpx PE=1 SV=2"	1.61892	0.156592	-0.805232	550.486	99.5742	479.471	0	520.237	199.148	450.911	0.180884	5.5284	0.742599
Q9QWR8|NAGAB_MOUSE	Alpha-N-acetylgalactosaminidase OS=Mus musculus OX=10090 GN=Naga PE=1 SV=2	1.61278	0.15792	-0.801563	1436.47	760.821	1478.94	640.576	652.055	526.171	675.651	0.529646	1.88806	0.276015
Q9R099|TBL2_MOUSE	Transducin beta-like protein 2 OS=Mus musculus OX=10090 GN=Tbl2 PE=1 SV=2	1.59671	0.161443	-0.791981	7056.44	1384.28	6446.38	1412.11	7065.3	748.064	5672.16	0.196172	5.09756	0.707362
Q61147|CERU_MOUSE	Ceruloplasmin OS=Mus musculus OX=10090 GN=Cp PE=1 SV=2	1.59632	0.16153	-0.791746	465.925	157.481	469.764	0	223.916	314.961	308.444	0.337996	2.95862	0.471089
P63017|HSP7C_MOUSE	Heat shock cognate 71 kDa protein OS=Mus musculus OX=10090 GN=Hspa8 PE=1 SV=1	1.58737	0.163526	-0.786414	38051.3	23324	36213.9	22296.3	11314.4	14706.9	14727.3	0.612961	1.63142	0.212567
Q6ZWY9|H2B1C_MOUSE	Histone H2B type 1-C_E_G OS=Mus musculus OX=10090 GN=H2bc4 PE=1 SV=3	-1.57293	0.166797	-0.777812	258.008	1062.57	175.949	963.527	326.671	969.446	-804.558	4.11835	0.242816	-0.614723
O35381|AN32A_MOUSE	Acidic leucine-rich nuclear phosphoprotein 32 family member A OS=Mus musculus OX=10090 GN=Anp32a PE=1 SV=1	-1.56957	0.167566	-0.775813	2865.64	10855.8	2139.24	9320.52	1569.77	10059.5	-7990.12	3.78825	0.263974	-0.578439
Q8VC28|AK1CD_MOUSE	Aldo-keto reductase family 1 member C13 OS=Mus musculus OX=10090 GN=Akr1c13 PE=1 SV=2	1.56785	0.167962	-0.77479	8201.32	3582.26	7034.43	3525.76	5610.81	1799.13	4619.05	0.436791	2.28942	0.359726
P35279|RAB6A_MOUSE	Ras-related protein Rab-6A OS=Mus musculus OX=10090 GN=Rab6a PE=1 SV=4	1.55285	0.171448	-0.765868	932.777	382.74	926.648	383.144	635.905	312.229	550.037	0.410323	2.4371	0.386874
Q8BGY2|IF5A2_MOUSE	Eukaryotic translation initiation factor 5A-2 OS=Mus musculus OX=10090 GN=Eif5a2 PE=1 SV=3	1.53042	0.176788	-0.752548	1144.64	544.687	959.102	671.229	689.675	372.922	599.958	0.475857	2.10147	0.322524
P23589|CAH5A_MOUSE	Carbonic anhydrase 5A, mitochondrial OS=Mus musculus OX=10090 GN=Ca5a PE=1 SV=2"	1.52833	0.177294	-0.751306	5793.67	3501.07	5508.94	2911	1792.14	2406.05	2292.6	0.604292	1.65483	0.218753
P35282|RAB21_MOUSE	Ras-related protein Rab-21 OS=Mus musculus OX=10090 GN=Rab21 PE=1 SV=4	1.51739	0.179961	-0.744822	1231.83	275.612	1111.02	259.459	1219.21	319.341	956.215	0.223743	4.46942	0.650251
P68372|TBB4B_MOUSE	Tubulin beta-4B chain OS=Mus musculus OX=10090 GN=Tubb4b PE=1 SV=1	1.50513	0.182997	-0.737557	11068.3	6077.58	13053.8	6519.5	5570.35	3598.49	4990.7	0.549099	1.82117	0.260349
Q9JLB0|MPP6_MOUSE	MAGUK p55 subfamily member 6 OS=Mus musculus OX=10090 GN=Mpp6 PE=1 SV=1	1.50341	0.183426	-0.73654	2770.7	691.978	2672.87	541.685	2745.58	329.95	2078.72	0.249748	4.00403	0.602497
Q91V41|RAB14_MOUSE	Ras-related protein Rab-14 OS=Mus musculus OX=10090 GN=Rab14 PE=1 SV=3	1.49837	0.18469	-0.733557	20597.5	12500.5	22452.3	13726.9	8906.49	6122.13	8096.96	0.606895	1.64773	0.216886
P47964|RL36_MOUSE	60S ribosomal protein L36 OS=Mus musculus OX=10090 GN=Rpl36 PE=1 SV=2	1.49569	0.185366	-0.731969	5875.23	891.224	4981.94	943.734	6625.92	716.06	4984.01	0.151692	6.59232	0.819038
Q8K0C4|CP51A_MOUSE	Lanosterol 14-alpha demethylase OS=Mus musculus OX=10090 GN=Cyp51a1 PE=1 SV=1	1.48725	0.187509	-0.726978	26301.6	15666.6	23823.6	17181.4	11890.2	7947.25	10635	0.595653	1.67883	0.225007
Q91ZX7|LRP1_MOUSE	Prolow-density lipoprotein receptor-related protein 1 OS=Mus musculus OX=10090 GN=Lrp1 PE=1 SV=1	1.48131	0.18903	-0.723469	11591	3404.52	7544.65	1871.16	10341.7	3901.21	8186.52	0.29372	3.4046	0.532066
P97364|SPS2_MOUSE	Selenide, water dikinase 2 OS=Mus musculus OX=10090 GN=Sephs2 PE=1 SV=3"	-1.48103	0.189102	-0.723304	5720	8865.68	5358.43	8264.67	1460.72	3988.92	-3145.68	1.54994	0.645185	-0.190316
Q9Z2I0|LETM1_MOUSE	Mitochondrial proton_calcium exchanger protein OS=Mus musculus OX=10090 GN=Letm1 PE=1 SV=1	-1.47854	0.189743	-0.721834	4010.74	8826.37	4503.62	9853.84	1770.93	6268.68	-4815.63	2.20068	0.454404	-0.342558
P07356|ANXA2_MOUSE	Annexin A2 OS=Mus musculus OX=10090 GN=Anxa2 PE=1 SV=2	1.46955	0.192077	-0.716525	1757.69	876.78	1514.49	651.926	744.738	939.517	880.911	0.498825	2.00471	0.302052
P04104|K2C1_MOUSE	Keratin, type II cytoskeletal 1 OS=Mus musculus OX=10090 GN=Krt1 PE=1 SV=4"	-1.46574	0.193074	-0.714277	40436.5	71635.9	40446.4	75878.3	22557.1	36104.2	-31199.4	1.77157	0.564473	-0.248357
Q91ZA3|PCCA_MOUSE	Propionyl-CoA carboxylase alpha chain, mitochondrial OS=Mus musculus OX=10090 GN=Pcca PE=1 SV=2"	1.4653	0.193189	-0.714018	2501.96	1127.39	2068.78	995.414	1714.6	761.689	1374.58	0.4506	2.21926	0.346208
Q9R062|GLYG_MOUSE	Glycogenin-1 OS=Mus musculus OX=10090 GN=Gyg1 PE=1 SV=3	1.46023	0.194524	-0.711028	1520.19	161.909	1161.28	140.768	1850.62	190.118	1358.28	0.106506	9.38914	0.972626
P61982|1433G_MOUSE	14-3-3 protein gamma OS=Mus musculus OX=10090 GN=Ywhag PE=1 SV=2	1.45724	0.195315	-0.709264	3587.58	1458.53	3608.94	184.169	1180.6	2672.92	2129.05	0.406549	2.45973	0.390887
P99028|QCR6_MOUSE	Cytochrome b-c1 complex subunit 6, mitochondrial OS=Mus musculus OX=10090 GN=Uqcrh PE=1 SV=2"	1.45539	0.195806	-0.708175	1328.17	1005.1	1216.93	1090.81	375.02	237.646	323.08	0.756749	1.32144	0.121048
Q99LC3|NDUAA_MOUSE	NADH dehydrogenase [ubiquinone] 1 alpha subcomplex subunit 10, mitochondrial OS=Mus musculus OX=10090 GN=Ndufa10 PE=1 SV=1"	1.44806	0.197761	-0.70386	5934.38	3631.99	6154.55	2635.48	1676.88	2701.88	2302.39	0.612025	1.63392	0.213231
Q91YP0|L2HDH_MOUSE	L-2-hydroxyglutarate dehydrogenase, mitochondrial OS=Mus musculus OX=10090 GN=L2hgdh PE=1 SV=1"	1.43222	0.202051	-0.694539	527.873	166.204	565.486	79.2369	445.053	238.747	361.669	0.314855	3.17606	0.501889
Q9R233|TPSN_MOUSE	Tapasin OS=Mus musculus OX=10090 GN=Tapbp PE=1 SV=2	1.42836	0.20311	-0.692269	13674.2	7506.38	15387.6	5149.91	5833.81	6368	6167.83	0.548944	1.82168	0.260472
Q91W43|GCSP_MOUSE	Glycine dehydrogenase (decarboxylating), mitochondrial OS=Mus musculus OX=10090 GN=Gldc PE=1 SV=1"	1.42495	0.204047	-0.690269	3547.66	1906.17	3217.6	1756.4	2240.04	538.748	1641.49	0.537304	1.86114	0.26978
P21958|TAP1_MOUSE	Antigen peptide transporter 1 OS=Mus musculus OX=10090 GN=Tap1 PE=1 SV=3	1.42367	0.204403	-0.689513	1055.41	314.471	800.042	284.3	1000.71	286.404	740.94	0.297961	3.35615	0.525841
Q9WUR9|KAD4_MOUSE	Adenylate kinase 4, mitochondrial OS=Mus musculus OX=10090 GN=Ak4 PE=1 SV=1"	1.41929	0.205615	-0.686946	609.287	231.888	696.525	289.467	506.343	162.608	377.399	0.38059	2.6275	0.419543
Q9Z2K1|K1C16_MOUSE	Keratin, type I cytoskeletal 16 OS=Mus musculus OX=10090 GN=Krt16 PE=1 SV=3"	1.41758	0.206091	-0.685942	3946.05	1350.18	3229.16	771.14	3329.53	1525.55	2595.87	0.342161	2.9226	0.46577
Q91VA0|ACSM1_MOUSE	Acyl-coenzyme A synthetase ACSM1, mitochondrial OS=Mus musculus OX=10090 GN=Acsm1 PE=1 SV=1"	1.41602	0.206527	-0.685023	10090.1	4954.26	10692.8	2932.23	4599.52	5609.31	5135.88	0.491	2.03666	0.308918
Q9ET01|PYGL_MOUSE	Glycogen phosphorylase, liver form OS=Mus musculus OX=10090 GN=Pygl PE=1 SV=4"	-1.41254	0.207499	-0.682984	2553.78	20804.8	2581.41	11061	403.91	25838.2	-18251	8.14668	0.122749	-0.91098
P02535|K1C10_MOUSE	Keratin, type I cytoskeletal 10 OS=Mus musculus OX=10090 GN=Krt10 PE=1 SV=3"	-1.41052	0.208068	-0.681795	18683.6	32306.1	18786.5	30859.5	6192.39	18296	-13622.5	1.72911	0.578331	-0.237823
O35490|BHMT1_MOUSE	Betaine--homocysteine S-methyltransferase 1 OS=Mus musculus OX=10090 GN=Bhmt PE=1 SV=1	1.41013	0.208176	-0.68157	248522	156950	253385	114165	62741.4	113718	91572.3	0.631533	1.58345	0.199604
Q91VT4|CBR4_MOUSE	Carbonyl reductase family member 4 OS=Mus musculus OX=10090 GN=Cbr4 PE=1 SV=2	1.4057	0.209424	-0.678974	3152.94	1462.19	2784.84	1070	2250.25	850.351	1690.75	0.463755	2.15631	0.333711
Q9DC29|ABCB6_MOUSE	ATP-binding cassette sub-family B member 6, mitochondrial OS=Mus musculus OX=10090 GN=Abcb6 PE=1 SV=1"	1.40236	0.210369	-0.677018	3977.96	1635.91	3628.58	1432.95	2917.86	1625.64	2342.05	0.411243	2.43165	0.385901
Q61586|GPAT1_MOUSE	Glycerol-3-phosphate acyltransferase 1, mitochondrial OS=Mus musculus OX=10090 GN=Gpam PE=1 SV=2"	1.39224	0.213261	-0.671089	749.545	306.83	760.646	331.642	585.742	247.731	442.715	0.409355	2.44287	0.3879
Q9EQI8|RM46_MOUSE	39S ribosomal protein L46, mitochondrial OS=Mus musculus OX=10090 GN=Mrpl46 PE=1 SV=1"	1.38597	0.215068	-0.667424	731.197	321.694	841.196	399.619	549.057	218.466	409.503	0.439956	2.27296	0.356591
Q3UV17|K22O_MOUSE	Keratin, type II cytoskeletal 2 oral OS=Mus musculus OX=10090 GN=Krt76 PE=1 SV=1"	-1.37954	0.216937	-0.663666	12966.9	24506.2	9206.07	23366.8	9543.04	13740.2	-11539.3	1.8899	0.529128	-0.27644
Q8C0I1|ADAS_MOUSE	Alkyldihydroxyacetonephosphate synthase, peroxisomal OS=Mus musculus OX=10090 GN=Agps PE=1 SV=1"	-1.37812	0.217354	-0.662831	2585.41	5631.71	2281.35	5810.12	1456.89	4174.02	-3046.3	2.17827	0.45908	-0.338112
Q80WW9|DDRGK_MOUSE	DDRGK domain-containing protein 1 OS=Mus musculus OX=10090 GN=Ddrgk1 PE=1 SV=2	1.37533	0.218171	-0.661204	623.316	79.289	368.679	0	775.067	158.578	544.027	0.127205	7.86132	0.895496
P40936|INMT_MOUSE	Indolethylamine N-methyltransferase OS=Mus musculus OX=10090 GN=Inmt PE=1 SV=1	-1.37274	0.218933	-0.65969	138.379	1319.58	130.758	720.526	160.27	1713.47	-1181.2	9.53597	0.104866	-0.979365
Q9CZB0|C560_MOUSE	Succinate dehydrogenase cytochrome b560 subunit, mitochondrial OS=Mus musculus OX=10090 GN=Sdhc PE=1 SV=1"	1.36656	0.220758	-0.656084	673.477	522.789	678.971	473.351	61.4297	211.809	150.688	0.776254	1.28824	0.109996
P26231|CTNA1_MOUSE	Catenin alpha-1 OS=Mus musculus OX=10090 GN=Ctnna1 PE=1 SV=1	1.364	0.221517	-0.654593	2409.87	1115.48	2233.16	1148.03	1678.02	886.798	1294.39	0.462879	2.16039	0.334533
P17439|GLCM_MOUSE	Lysosomal acid glucosylceramidase OS=Mus musculus OX=10090 GN=Gba PE=1 SV=1	1.35783	0.223358	-0.650998	2638.84	610.23	1685.53	415.86	2905.7	696.541	2028.61	0.231249	4.32434	0.63592
P41216|ACSL1_MOUSE	Long-chain-fatty-acid--CoA ligase 1 OS=Mus musculus OX=10090 GN=Acsl1 PE=1 SV=2	-1.35769	0.223401	-0.650915	202048	283502	213660	274935	54118.9	107093	-81455	1.40315	0.712683	-0.147103
Q3TTY5|K22E_MOUSE	Keratin, type II cytoskeletal 2 epidermal OS=Mus musculus OX=10090 GN=Krt2 PE=1 SV=1"	-1.35627	0.223828	-0.650086	1730.49	3295.13	1465.96	2928.91	1574.49	1686.57	-1564.64	1.90416	0.525165	-0.279704
Q3TLP5|ECHD2_MOUSE	Enoyl-CoA hydratase domain-containing protein 2, mitochondrial OS=Mus musculus OX=10090 GN=Echdc2 PE=1 SV=2"	1.35623	0.223838	-0.650066	2544.71	1342.52	2325.82	1076.66	1551.8	857.266	1202.19	0.527571	1.89548	0.277719
O09043|NAPSA_MOUSE	Napsin-A OS=Mus musculus OX=10090 GN=Napsa PE=1 SV=1	1.35372	0.224593	-0.648604	3398.13	1064	1838.45	954.089	3387.6	644.989	2334.13	0.313114	3.19373	0.504298
P18581|CTR2_MOUSE	Cationic amino acid transporter 2 OS=Mus musculus OX=10090 GN=Slc7a2 PE=1 SV=3	1.35271	0.224897	-0.648016	1064.03	203.728	882.959	236.563	1263.72	144.637	860.302	0.191468	5.22281	0.717904
Q8R0G7|SPNS1_MOUSE	Protein spinster homolog 1 OS=Mus musculus OX=10090 GN=Spns1 PE=2 SV=1	1.34867	0.22612	-0.645661	598.276	221.778	668.052	117.991	466.287	307.091	376.498	0.370695	2.69764	0.430984
Q3U3R4|LMF1_MOUSE	Lipase maturation factor 1 OS=Mus musculus OX=10090 GN=Lmf1 PE=1 SV=1	1.34283	0.227896	-0.642264	1602.28	782.15	1605.68	842.608	1155.88	394.956	820.13	0.488148	2.04856	0.311448
Q07076|ANXA7_MOUSE	Annexin A7 OS=Mus musculus OX=10090 GN=Anxa7 PE=1 SV=2	1.33758	0.229502	-0.639213	1686.21	848.903	1822.54	833.074	1223.18	266.945	837.305	0.503439	1.98634	0.298053
Q9D9V3|ECHD1_MOUSE	Ethylmalonyl-CoA decarboxylase OS=Mus musculus OX=10090 GN=Echdc1 PE=1 SV=2	1.33019	0.231783	-0.634919	2084.12	663.323	1422.2	490.596	2103.48	372.666	1420.8	0.318275	3.14194	0.497197
Q9Z0M5|LICH_MOUSE	Lysosomal acid lipase_cholesteryl ester hydrolase OS=Mus musculus OX=10090 GN=Lipa PE=1 SV=2	1.32728	0.232683	-0.633235	712.491	391.537	717.797	341.079	150.671	459.555	320.954	0.549533	1.81973	0.260006
Q9CQZ6|NDUB3_MOUSE	NADH dehydrogenase [ubiquinone] 1 beta subcomplex subunit 3 OS=Mus musculus OX=10090 GN=Ndufb3 PE=1 SV=1	1.32425	0.233629	-0.631473	1639.9	309.121	1370.75	85.5569	1943.93	510.579	1330.78	0.1885	5.30504	0.724689
Q8VDJ3|VIGLN_MOUSE	Vigilin OS=Mus musculus OX=10090 GN=Hdlbp PE=1 SV=1	1.32125	0.234565	-0.629737	907.927	431.107	659.98	377.747	707.603	142.295	476.82	0.474826	2.10604	0.323466
Q8BGA8|ACSM5_MOUSE	Acyl-coenzyme A synthetase ACSM5, mitochondrial OS=Mus musculus OX=10090 GN=Acsm5 PE=1 SV=1"	1.31348	0.237012	-0.62523	5169.05	2890.21	5650.22	2507.76	2990.42	1760.06	2278.84	0.559138	1.78847	0.252481
Q99J99|THTM_MOUSE	3-mercaptopyruvate sulfurtransferase OS=Mus musculus OX=10090 GN=Mpst PE=1 SV=4	1.31258	0.237293	-0.624714	8791.18	4521.3	8440.09	2507.84	4190.31	4976.96	4269.88	0.5143	1.94439	0.288784
Q8R1M2|H2AJ_MOUSE	Histone H2A.J OS=Mus musculus OX=10090 GN=H2aj PE=1 SV=1	-1.30846	0.238603	-0.622325	453.717	1501.45	369.06	1382.2	541.839	1507.04	-1047.74	3.30923	0.302185	-0.519727
Q9R013|CATF_MOUSE	Cathepsin F OS=Mus musculus OX=10090 GN=Ctsf PE=1 SV=1	1.30644	0.239246	-0.621155	934.745	509.87	834.007	430.389	561.617	328.101	424.875	0.545465	1.8333	0.263234
Q8K273|EMC5_MOUSE	ER membrane protein complex subunit 5 OS=Mus musculus OX=10090 GN=Mmgt1 PE=1 SV=1	1.30534	0.239596	-0.62052	104.985	20.0354	89.5	0	123.836	40.0708	84.9498	0.19084	5.23998	0.71933
Q9CQW2|ARL8B_MOUSE	ADP-ribosylation factor-like protein 8B OS=Mus musculus OX=10090 GN=Arl8b PE=1 SV=1	1.29832	0.241844	-0.616464	3379.97	1494.9	3190.82	1527.37	2705.49	1054.87	1885.07	0.442281	2.261	0.354301
P61021|RAB5B_MOUSE	Ras-related protein Rab-5B OS=Mus musculus OX=10090 GN=Rab5b PE=1 SV=1	1.29821	0.24188	-0.616399	416.353	123.692	340.631	103.908	426.425	146.436	292.661	0.297085	3.36604	0.527119
O54909|RDH16_MOUSE	Retinol dehydrogenase 16 OS=Mus musculus OX=10090 GN=Rdh16 PE=1 SV=1	1.29673	0.242358	-0.615543	6203.74	2340.43	4026.27	2513.77	5758.85	1529.69	3863.31	0.377261	2.65069	0.423358
O35857|TIM44_MOUSE	Mitochondrial import inner membrane translocase subunit TIM44 OS=Mus musculus OX=10090 GN=Timm44 PE=1 SV=2	1.28857	0.245001	-0.610832	563.072	346.343	555.047	319.901	95.8064	322.456	216.729	0.615095	1.62577	0.211058
Q99M71|EPDR1_MOUSE	Mammalian ependymin-related protein 1 OS=Mus musculus OX=10090 GN=Epdr1 PE=1 SV=1	1.28711	0.245478	-0.609988	1133.67	488.664	849.389	481.775	906.073	428.42	645.003	0.431047	2.31993	0.365475
P14131|RS16_MOUSE	40S ribosomal protein S16 OS=Mus musculus OX=10090 GN=Rps16 PE=1 SV=4	1.28377	0.246566	-0.608066	1524.05	1199.27	1496.66	1239.22	483.346	149.62	324.778	0.786898	1.27081	0.104082
P70404|IDHG1_MOUSE	Isocitrate dehydrogenase [NAD] subunit gamma 1, mitochondrial OS=Mus musculus OX=10090 GN=Idh3g PE=1 SV=1"	1.28246	0.246998	-0.607307	663.545	306.95	731.417	361.259	510.447	220.689	356.595	0.462591	2.16174	0.334803
P70194|CLC4F_MOUSE	C-type lectin domain family 4 member F OS=Mus musculus OX=10090 GN=Clec4f PE=1 SV=1	1.27293	0.250139	-0.601819	1368.47	573.611	841.164	574.31	1222.11	257.127	794.863	0.419161	2.38572	0.377619
Q9CPR4|RL17_MOUSE	60S ribosomal protein L17 OS=Mus musculus OX=10090 GN=Rpl17 PE=1 SV=3	1.26846	0.251625	-0.599246	2461.23	936.629	2087.97	756.45	2301.59	693.742	1524.6	0.380553	2.62776	0.419585
Q9CYH2|PXL2A_MOUSE	Peroxiredoxin-like 2A OS=Mus musculus OX=10090 GN=Prxl2a PE=1 SV=2	1.25881	0.25486	-0.593698	7364.63	3964.94	7335.07	4884.01	4917.83	2233.92	3399.68	0.538377	1.85743	0.268914
Q3TDN2|FAF2_MOUSE	FAS-associated factor 2 OS=Mus musculus OX=10090 GN=Faf2 PE=1 SV=2	-1.25853	0.254954	-0.593538	619.697	1036.64	623.736	1004.31	533.588	392.815	-416.941	1.67282	0.597795	-0.223448
P70694|DHB5_MOUSE	Estradiol 17 beta-dehydrogenase 5 OS=Mus musculus OX=10090 GN=Akr1c6 PE=1 SV=1	1.25004	0.257829	-0.588668	36602.3	23561.5	35950.4	20262.3	13897.6	15562.2	13040.7	0.643718	1.55348	0.191305
Q9WV55|VAPA_MOUSE	Vesicle-associated membrane protein-associated protein A OS=Mus musculus OX=10090 GN=Vapa PE=1 SV=2	1.24854	0.258341	-0.587807	20099.5	13588.2	22524.9	15068.8	9244.57	4829.82	6511.27	0.676047	1.47919	0.170023
Q8R164|BPHL_MOUSE	Valacyclovir hydrolase OS=Mus musculus OX=10090 GN=Bphl PE=1 SV=1	-1.2397	0.261372	-0.582741	15373.9	23683.3	15331.8	21678.1	1943.02	13264	-8309.42	1.54049	0.649144	-0.187659
Q9D1M7|FKB11_MOUSE	Peptidyl-prolyl cis-trans isomerase FKBP11 OS=Mus musculus OX=10090 GN=Fkbp11 PE=1 SV=1	1.22382	0.266892	-0.573664	2863	1174.13	1923.47	1055.71	2693.28	603.09	1688.87	0.410105	2.4384	0.387105
P61161|ARP2_MOUSE	Actin-related protein 2 OS=Mus musculus OX=10090 GN=Actr2 PE=1 SV=1	1.22328	0.267083	-0.573354	1614.85	797.736	1269.2	795.621	1236.94	504.687	817.114	0.494	2.02429	0.306273
Q91WS0|CISD1_MOUSE	CDGSH iron-sulfur domain-containing protein 1 OS=Mus musculus OX=10090 GN=Cisd1 PE=1 SV=1	1.21638	0.269515	-0.569417	13693.8	11193.2	14499.5	11681.4	3492.63	2169.25	2500.55	0.817394	1.2234	0.0875683
Q8R4N0|CLYBL_MOUSE	Citramalyl-CoA lyase, mitochondrial OS=Mus musculus OX=10090 GN=Clybl PE=1 SV=2"	1.21275	0.270804	-0.567345	653.816	197.344	486.35	228.071	737.904	148.964	456.472	0.301834	3.31308	0.520233
Q8QZY2|GLCTK_MOUSE	Glycerate kinase OS=Mus musculus OX=10090 GN=Glyctk PE=1 SV=1	-1.2083	0.272388	-0.564812	123.233	358.551	0	405.286	246.465	301.608	-235.319	2.90955	0.343696	-0.463825
O89017|LGMN_MOUSE	Legumain OS=Mus musculus OX=10090 GN=Lgmn PE=1 SV=1	1.20678	0.27293	-0.563948	638.075	252.097	498.882	157.103	548.079	329.849	385.978	0.39509	2.53107	0.403304
Q9CW42|MARC1_MOUSE	Mitochondrial amidoxime-reducing component 1 OS=Mus musculus OX=10090 GN=Mtarc1 PE=1 SV=2	-1.20351	0.274105	-0.562083	20493.3	31181.2	21934.6	28895.1	5271.08	16961	-10687.9	1.52153	0.657233	-0.18228
P49935|CATH_MOUSE	Pro-cathepsin H OS=Mus musculus OX=10090 GN=Ctsh PE=1 SV=2	1.19896	0.275744	-0.559495	1111.3	735.242	962.843	860.189	321.798	538.474	376.054	0.661608	1.51147	0.179399
P62082|RS7_MOUSE	40S ribosomal protein S7 OS=Mus musculus OX=10090 GN=Rps7 PE=2 SV=1	1.19663	0.276586	-0.55817	3854.49	1897.91	3918.18	1010.93	2101.21	2505.75	1956.58	0.49239	2.03091	0.307691
P97821|CATC_MOUSE	Dipeptidyl peptidase 1 OS=Mus musculus OX=10090 GN=Ctsc PE=1 SV=1	1.19216	0.278208	-0.55563	2013.48	985.893	1814.06	912.776	1662.12	457.412	1027.59	0.489646	2.04229	0.310117
Q60692|PSB6_MOUSE	Proteasome subunit beta type-6 OS=Mus musculus OX=10090 GN=Psmb6 PE=1 SV=3	1.18119	0.282222	-0.549409	1190.94	563.463	1145.93	455.108	821.074	674.262	627.474	0.473126	2.1136	0.325023
Q6P5H2|NEST_MOUSE	Nestin OS=Mus musculus OX=10090 GN=Nes PE=1 SV=1	-1.17986	0.28271	-0.548658	34237.9	61995.5	27420.4	59894.5	18545.4	43243.3	-27757.6	1.81073	0.552264	-0.257853
Q9WUQ2|PREB_MOUSE	Prolactin regulatory element-binding protein OS=Mus musculus OX=10090 GN=Preb PE=1 SV=1	1.1716	0.28577	-0.543984	784.229	478.473	656.503	411.429	422.058	307.071	305.756	0.610119	1.63902	0.214585
P35492|HUTH_MOUSE	Histidine ammonia-lyase OS=Mus musculus OX=10090 GN=Hal PE=1 SV=1	1.16542	0.28808	-0.540487	6013.47	2891.64	5988.35	1043.92	3399.92	4140.35	3121.83	0.480861	2.0796	0.31798
P11679|K2C8_MOUSE	Keratin, type II cytoskeletal 8 OS=Mus musculus OX=10090 GN=Krt8 PE=1 SV=4"	-1.16489	0.288278	-0.540188	22430.4	33937	24635.4	29785.3	11625.3	15973	-11506.6	1.51299	0.660943	-0.179836
P15208|INSR_MOUSE	Insulin receptor OS=Mus musculus OX=10090 GN=Insr PE=1 SV=2	1.15579	0.291708	-0.535052	361.72	116.594	262.133	98.7871	401.186	137.735	245.127	0.322331	3.1024	0.491698
Q3UZZ6|ST1D1_MOUSE	Sulfotransferase 1 family member D1 OS=Mus musculus OX=10090 GN=Sult1d1 PE=1 SV=1	-1.14961	0.294058	-0.531567	329.276	676.335	323.305	837.419	380.34	468.937	-347.059	2.05401	0.486853	-0.312602
P05784|K1C18_MOUSE	Keratin, type I cytoskeletal 18 OS=Mus musculus OX=10090 GN=Krt18 PE=1 SV=5"	-1.1494	0.294135	-0.531453	83081.3	117292	86856	103446	32163.8	50090.6	-34210.8	1.41178	0.708328	-0.149766
Q2TBE6|P4K2A_MOUSE	Phosphatidylinositol 4-kinase type 2-alpha OS=Mus musculus OX=10090 GN=Pi4k2a PE=1 SV=1	1.14803	0.294658	-0.530682	395.905	185.751	434.896	169.9	295.572	216.043	210.154	0.469181	2.13138	0.32866
Q99L04|DHRS1_MOUSE	Dehydrogenase_reductase SDR family member 1 OS=Mus musculus OX=10090 GN=Dhrs1 PE=1 SV=1	1.14703	0.295043	-0.530115	35104.2	23419.2	30845.3	22700	18853.7	7724.03	11685.1	0.667132	1.49895	0.175788
P70699|LYAG_MOUSE	Lysosomal alpha-glucosidase OS=Mus musculus OX=10090 GN=Gaa PE=1 SV=2	-1.14362	0.296348	-0.528199	2691.34	4647.31	2266.78	3938.14	1390.17	3125.44	-1955.97	1.72677	0.579117	-0.237234
O88428|PAPS2_MOUSE	Bifunctional 3'-phosphoadenosine 5'-phosphosulfate synthase 2 OS=Mus musculus OX=10090 GN=Papss2 PE=1 SV=2	1.1421	0.296931	-0.527344	2326.7	1301.39	2608.78	1274.06	1588.68	836.539	1025.31	0.55933	1.78785	0.252332
B2RXS4|PLXB2_MOUSE	Plexin-B2 OS=Mus musculus OX=10090 GN=Plxnb2 PE=1 SV=1	1.12513	0.303517	-0.517818	2608.22	1076.22	2298.7	864.456	2592.05	834.991	1532	0.412627	2.4235	0.384443
Q9DB30|PHKG2_MOUSE	Phosphorylase b kinase gamma catalytic chain, liver_testis isoform OS=Mus musculus OX=10090 GN=Phkg2 PE=2 SV=2"	-1.12398	0.303968	-0.517172	1151.55	2796.83	754.761	1917.99	893.156	2788.01	-1645.27	2.42874	0.411736	-0.385381
Q8VED5|K2C79_MOUSE	Keratin, type II cytoskeletal 79 OS=Mus musculus OX=10090 GN=Krt79 PE=1 SV=2"	-1.12052	0.30533	-0.51523	5037.68	10311.7	3683.92	10086.9	4982.33	7986.97	-5274.02	2.04692	0.48854	-0.3111
P62137|PP1A_MOUSE	Serine_threonine-protein phosphatase PP1-alpha catalytic subunit OS=Mus musculus OX=10090 GN=Ppp1ca PE=1 SV=1	-1.11758	0.30649	-0.513584	1514.83	3340.74	1575.9	3488.29	369.761	3246.65	-1825.91	2.20536	0.45344	-0.34348
Q8BVW3|TRI14_MOUSE	Tripartite motif-containing protein 14 OS=Mus musculus OX=10090 GN=Trim14 PE=1 SV=2	1.11299	0.308305	-0.511019	3177.3	1867.67	2523.07	1784.04	1930.04	1346.59	1309.64	0.587815	1.70121	0.230759
Q64442|DHSO_MOUSE	Sorbitol dehydrogenase OS=Mus musculus OX=10090 GN=Sord PE=1 SV=3	1.11132	0.30897	-0.510084	15797.7	8647.55	15571.9	2687.15	4300.79	12127.9	7150.16	0.547393	1.82684	0.261701
Q8K2C9|HACD3_MOUSE	Very-long-chain (3R)-3-hydroxyacyl-CoA dehydratase 3 OS=Mus musculus OX=10090 GN=Hacd3 PE=1 SV=2	1.10149	0.312897	-0.504599	667.843	247.68	596.657	152.021	689.795	325.877	420.162	0.370866	2.69639	0.430782
Q99L20|GSTT3_MOUSE	Glutathione S-transferase theta-3 OS=Mus musculus OX=10090 GN=Gstt3 PE=1 SV=1	1.08946	0.31776	-0.497901	2389.91	1575.46	2275.43	1571.68	1069.07	1045.23	814.443	0.659216	1.51695	0.180973
Q91X72|HEMO_MOUSE	Hemopexin OS=Mus musculus OX=10090 GN=Hpx PE=1 SV=2	1.08325	0.320297	-0.494447	3202.62	1576.76	1947.82	1890.58	2905.64	753.755	1625.86	0.492335	2.03114	0.30774
P19536|COX5B_MOUSE	Cytochrome c oxidase subunit 5B, mitochondrial OS=Mus musculus OX=10090 GN=Cox5b PE=1 SV=1"	1.08214	0.320751	-0.493832	330.107	116.788	288.199	0	317.612	233.576	213.319	0.353789	2.82655	0.451256
P50429|ARSB_MOUSE	Arylsulfatase B OS=Mus musculus OX=10090 GN=Arsb PE=1 SV=3	1.07424	0.324004	-0.489449	657.437	247.367	468.074	253.954	734.77	207.322	410.07	0.376259	2.65774	0.424513
Q60766|IRGM1_MOUSE	Immunity-related GTPase family M protein 1 OS=Mus musculus OX=10090 GN=Irgm1 PE=1 SV=1	1.0727	0.324644	-0.488593	7336.12	5658.71	7913.04	5130.38	2353.08	2060.09	1677.41	0.771349	1.29643	0.112749
Q8BH24|TM9S4_MOUSE	Transmembrane 9 superfamily member 4 OS=Mus musculus OX=10090 GN=Tm9sf4 PE=1 SV=1	1.07134	0.325206	-0.487842	1813.03	1057.45	1272.18	960.867	1276.28	600.574	755.578	0.583251	1.71453	0.234145
Q7TSH2|KPBB_MOUSE	Phosphorylase b kinase regulatory subunit beta OS=Mus musculus OX=10090 GN=Phkb PE=1 SV=1	-1.07092	0.325382	-0.487606	613.393	1467.22	457.456	1248.49	600.142	1477.33	-853.828	2.39197	0.418065	-0.378756
[truncated: 223 more rows]

## Sheet: Protein quant. - replicates
Protein, Accession Uniprot	LM-Top 1	LM-Top 2	LM-Top 3	LM-Top 4	LM-PO 1	LM-PO 2	LM-PO 3	LM-PO 4	FLM-Top 1	FLM-Top 2	FLM-Top 3	FLM-Top 4	FLM-PO 1	FLM-PO 2	FLM-PO 3	FLM-PO 4
[truncated: 1,077 more rows]

[truncated: 3 more sheets: Log2 LM vs. FLM ratios, Manual cluster affiliation, Random forest prediction]
