# Supplementary figures and images for: Analysis of the Mouse Hepatic Peroxisome Proteome—Identification of Novel Protein Constituents Using a Semi-Quantitative SWATH-MS Approach
Source: MDPI journal article supplement (doi:10.3390/cells13020176), 2024-01-17

A

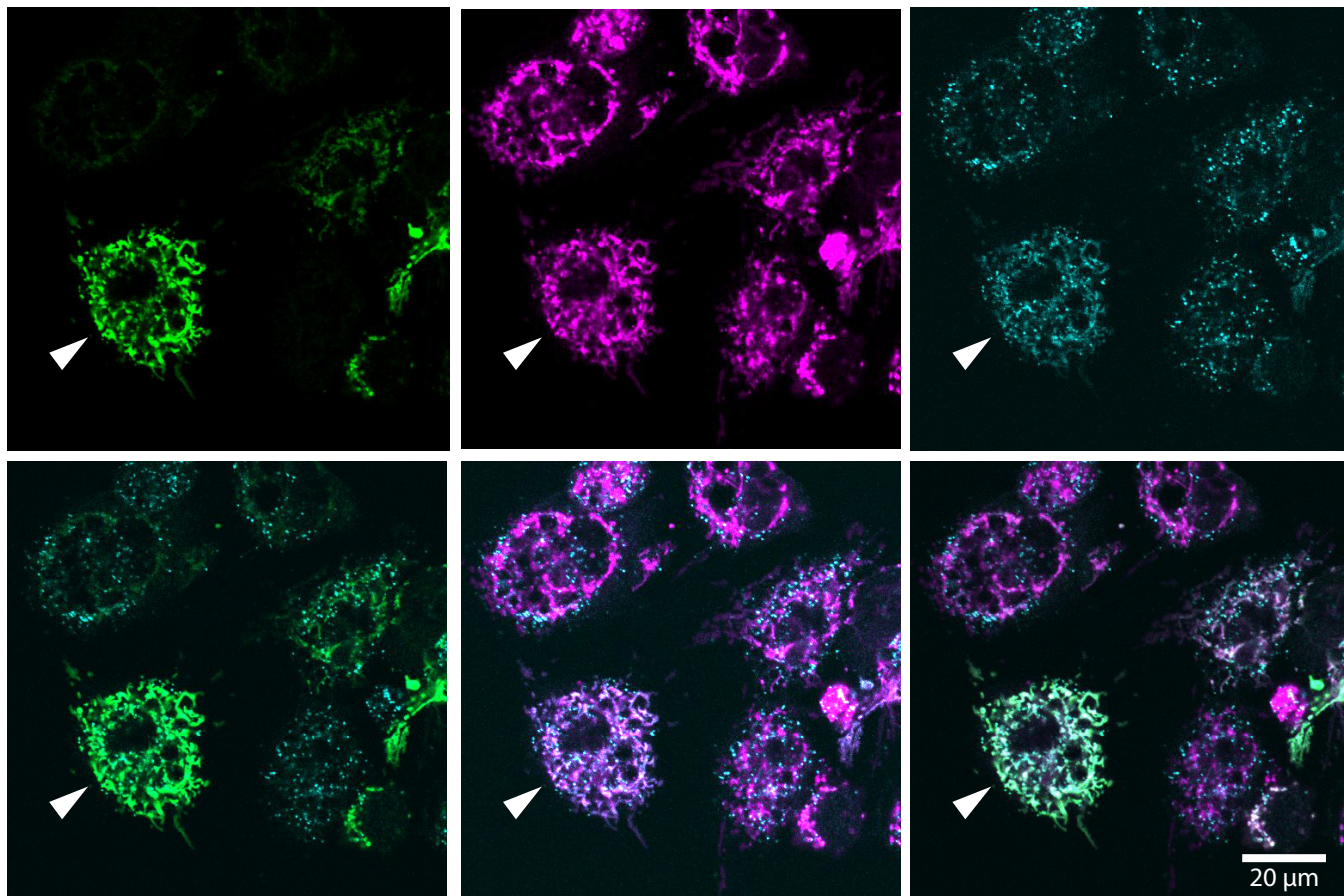

B

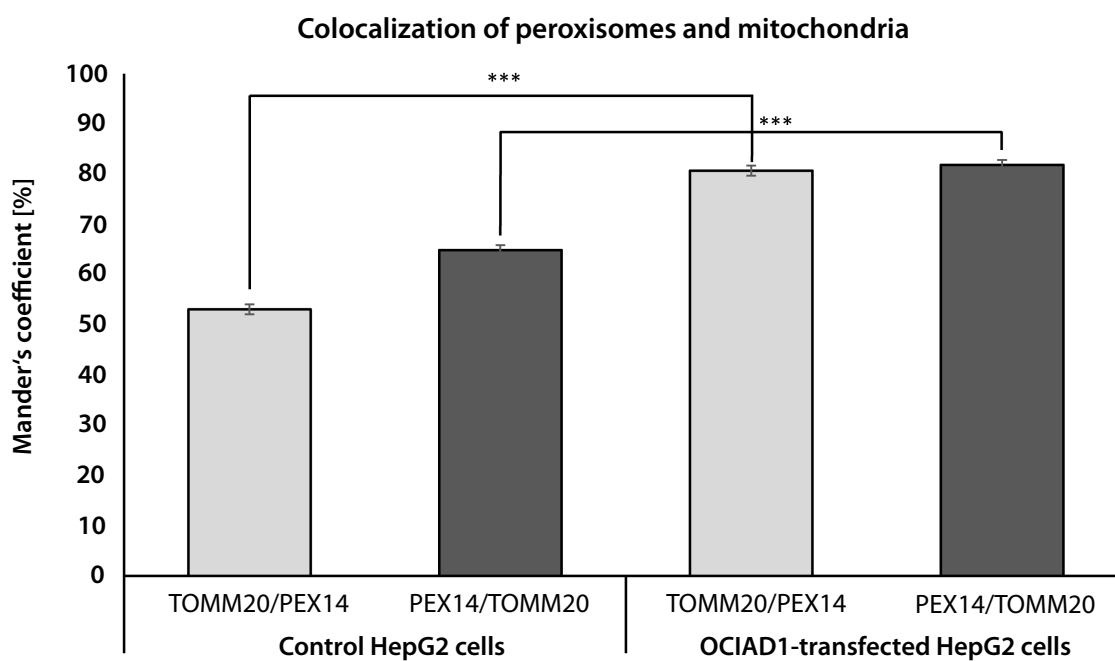

Supplement: s1 [file s1]

Original immunoblots from Fig. 2A:

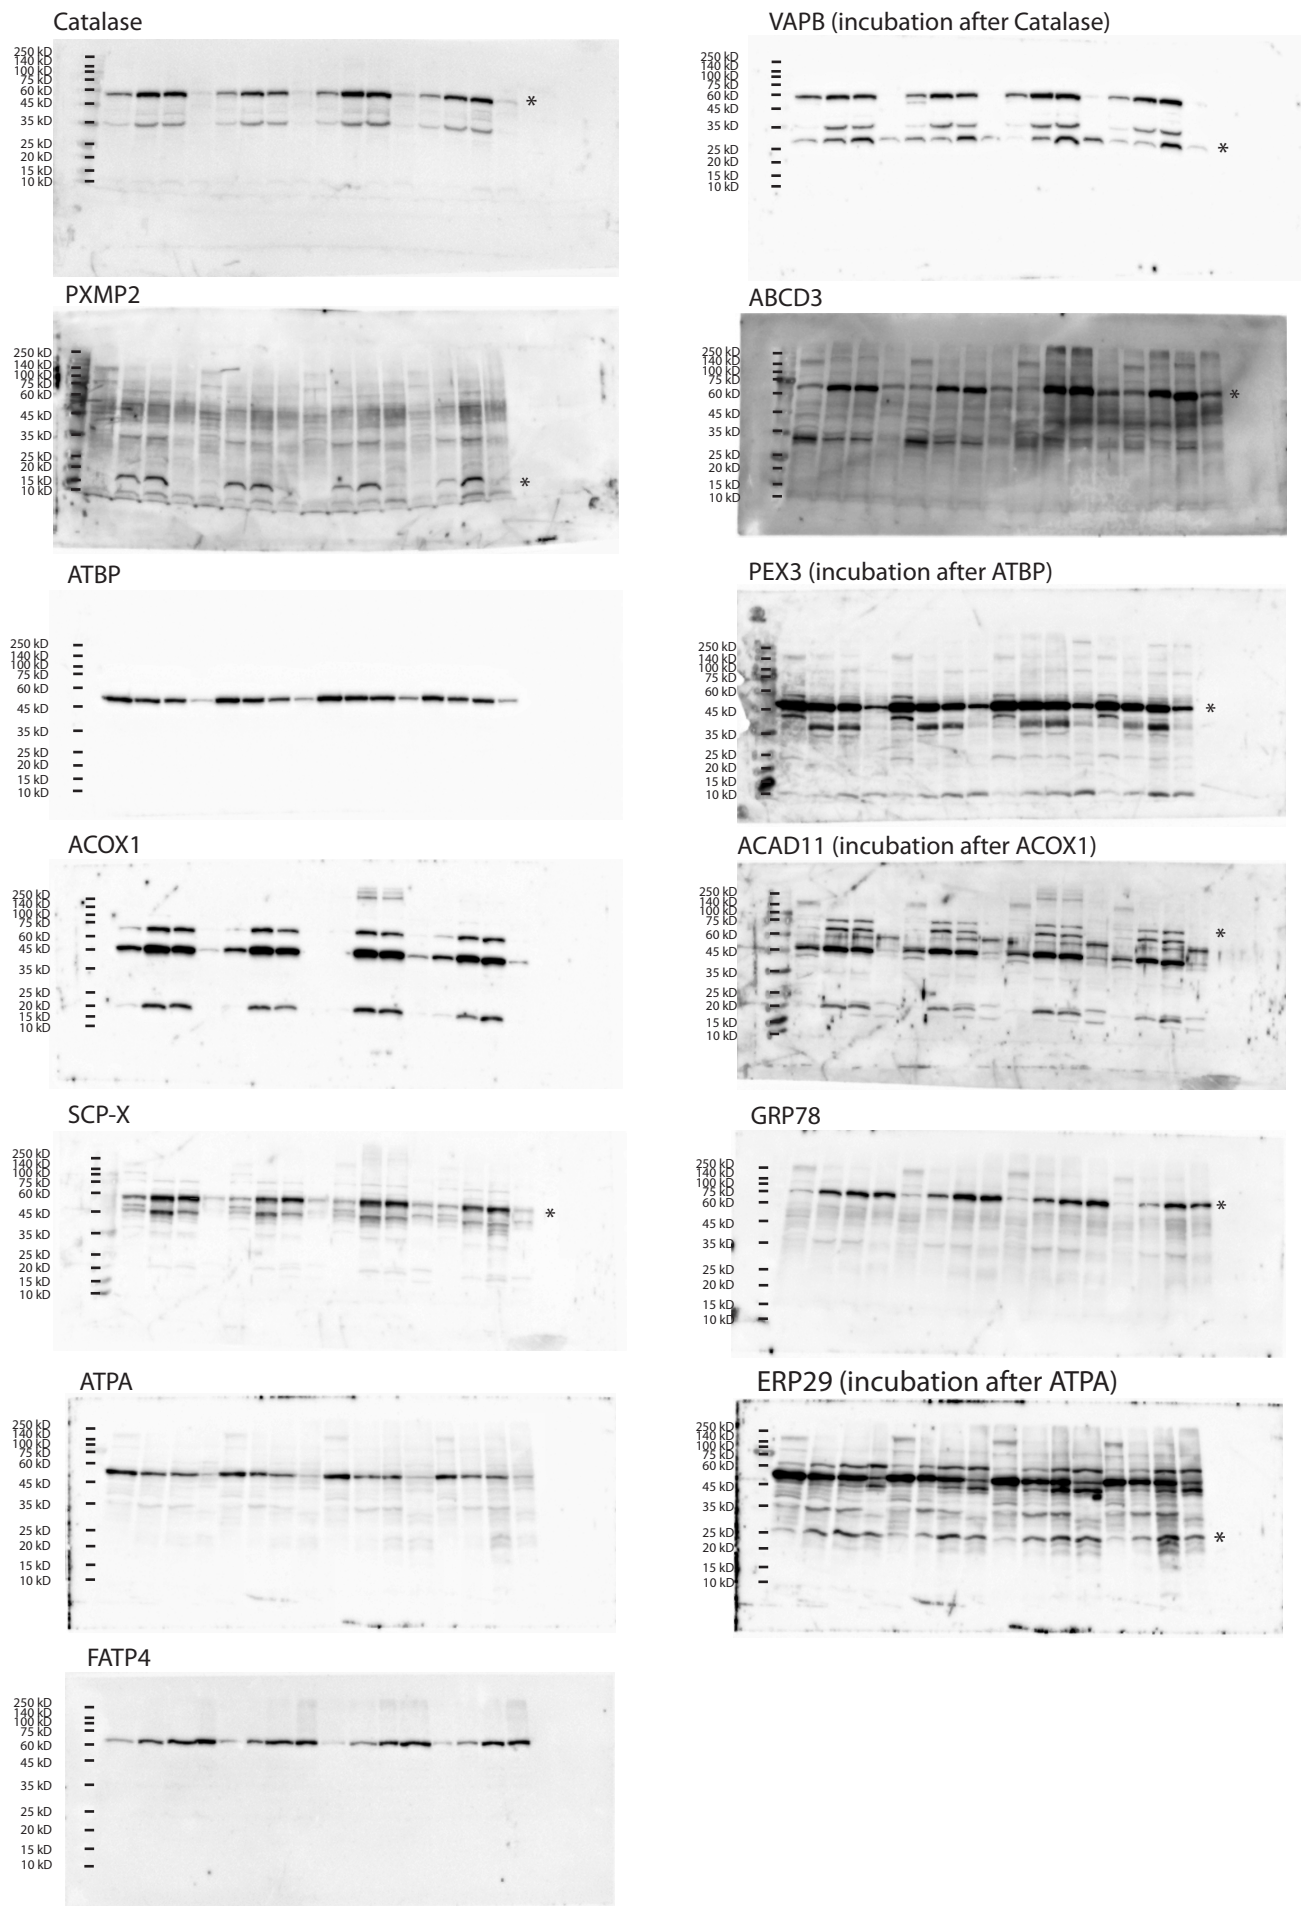

Supplement: s1 [file s1]

Original immunoblots from Fig. 2B

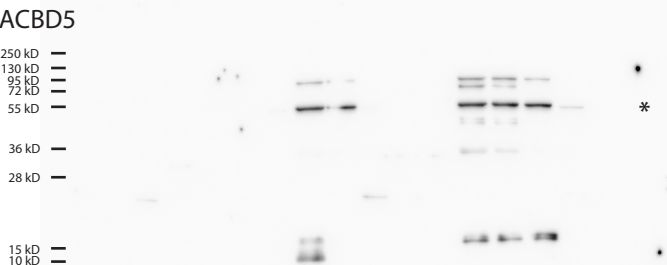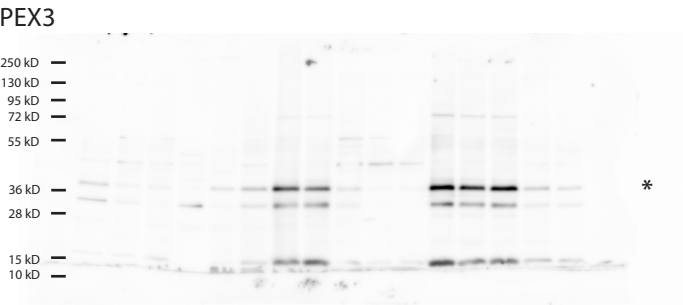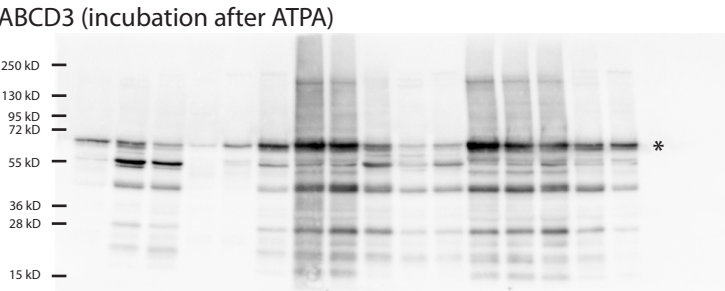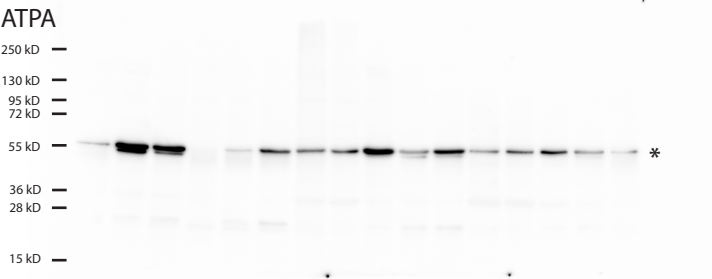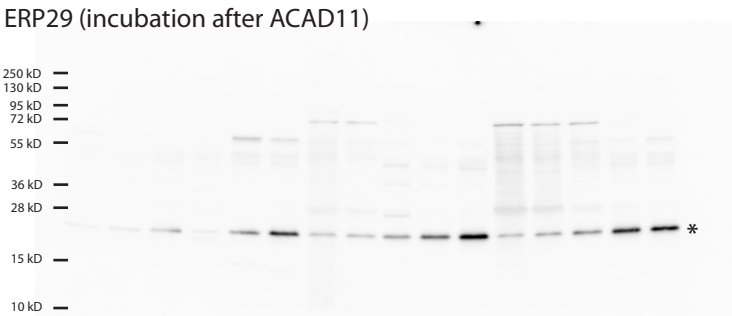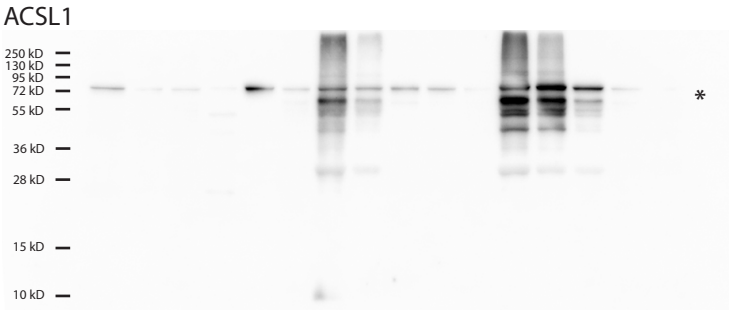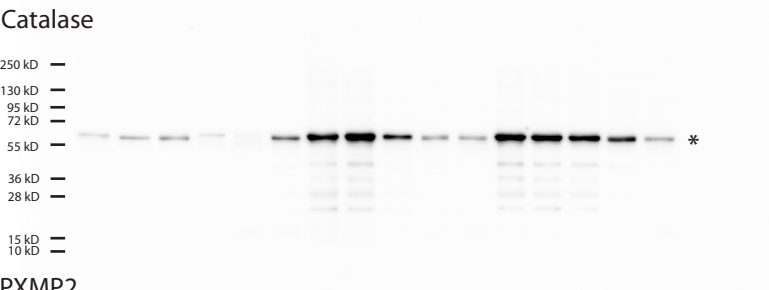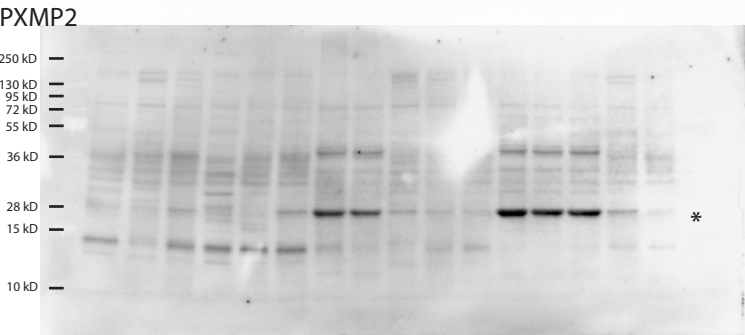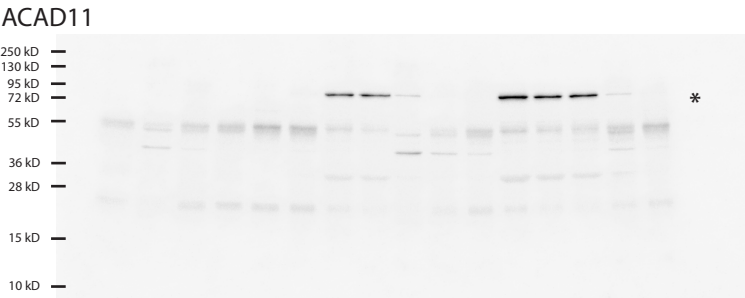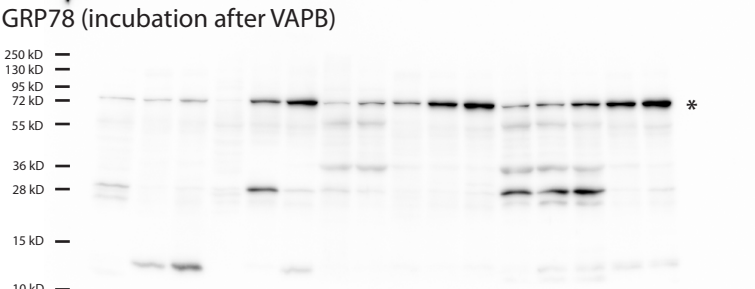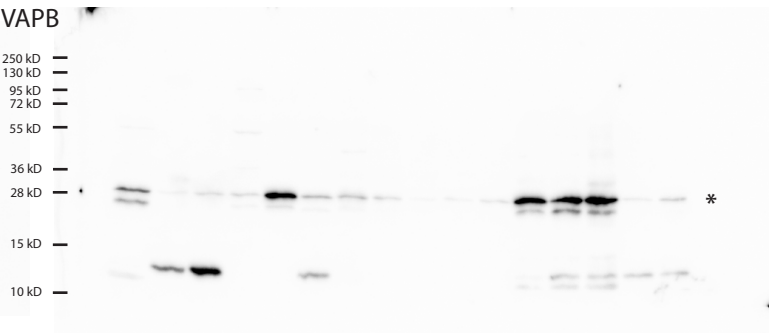

Supplement: s1 [file s1]
